# Supplementary material for: Analysis and Construction of ceRNA Networks Reveal 4 mRNAs as Potential Biomarkers of Temozolomide-resistant Glioblastomas
Source: Research Square preprint supplement (doi:10.21203/rs.3.rs-515099/v1), 2021-05-21
Supplement: Supplementary file 1 [file 1b5e4fad6403afc56ea87e4c.xlsx]

## Sheet: Sheet1
expression profiles of selected samples
gene	Ensembl_ID	Type	TCGA-02-0055	TCGA-02-2483	TCGA-02-2485	TCGA-06-0130	TCGA-06-0141	TCGA-06-0168	TCGA-06-0184	TCGA-06-0644	TCGA-06-0743	TCGA-06-0744	TCGA-06-0882	TCGA-06-2559	TCGA-06-2562	TCGA-06-2563	TCGA-06-2564	TCGA-06-2565	TCGA-06-2567	TCGA-06-2570	TCGA-06-5411	TCGA-06-5412	TCGA-06-5416	TCGA-06-5417	TCGA-06-5859	TCGA-12-1597	TCGA-12-3653	TCGA-12-5295	TCGA-12-5299	TCGA-14-0789	TCGA-14-1402	TCGA-14-1823	TCGA-15-0742	TCGA-19-1389	TCGA-19-1787	TCGA-19-2619	TCGA-19-2620	TCGA-19-4065	TCGA-19-5960	TCGA-26-5132	TCGA-26-5133	TCGA-27-1830	TCGA-27-1835	TCGA-27-2519	TCGA-27-2523	TCGA-27-2528	TCGA-28-2509	TCGA-28-2514	TCGA-28-5204
gene	Ensembl_ID	Type	TCGA-02-0055-01A	TCGA-02-2483-01A	TCGA-02-2485-01A	TCGA-06-0130-01A	TCGA-06-0141-01A	TCGA-06-0168-01A	TCGA-06-0184-01A	TCGA-06-0644-01A	TCGA-06-0743-01A	TCGA-06-0744-01A	TCGA-06-0882-01A	TCGA-06-2559-01A	TCGA-06-2562-01A	TCGA-06-2563-01A	TCGA-06-2564-01A	TCGA-06-2565-01A	TCGA-06-2567-01A	TCGA-06-2570-01A	TCGA-06-5411-01A	TCGA-06-5412-01A	TCGA-06-5416-01A	TCGA-06-5417-01A	TCGA-06-5859-01A	TCGA-12-1597-01B	TCGA-12-3653-01A	TCGA-12-5295-01A	TCGA-12-5299-01A	TCGA-14-0789-01A	TCGA-14-1402-02A	TCGA-14-1823-01A	TCGA-15-0742-01A	TCGA-19-1389-02A	TCGA-19-1787-01B	TCGA-19-2619-01A	TCGA-19-2620-01A	TCGA-19-4065-01A	TCGA-19-5960-01A	TCGA-26-5132-01A	TCGA-26-5133-01A	TCGA-27-1830-01A	TCGA-27-1835-01A	TCGA-27-2519-01A	TCGA-27-2523-01A	TCGA-27-2528-01A	TCGA-28-2509-01A	TCGA-28-2514-01A	TCGA-28-5204-01A
A2M-AS1	ENSG00000245105.2	lncRNA	14.4269	12.1832	11.5819	13.1962	13.4538	12.8002	12.4783	12.4585	11.7768	12.4749	14.409	11.4518	12.5805	13.4252	12.1817	12.4586	12.4799	12.5675	13.3977	15.3484	14.3516	11.9592	12.7905	12.2659	9.8952	13.1926	11.8964	14.4457	13.2321	12.808	11.7539	14.7962	13.1681	12.5267	15.8627	13.0858	13.4184	12.112	11.5546	13.6875	11.8735	13.5915	12.3177	13.0684	12.6152	11.8737	11.2296
ACVR2B-AS1	ENSG00000229589.1	lncRNA	12.5311	15.0607	12.9347	11.7075	12.4538	12.6008	13.6531	12.0956	12.7866	13.3864	13.1419	12.0753	12.629	12.6804	12.871	13.8136	14.1751	13.5904	12.8589	13.1913	15.4012	14.7229	11.9132	13.1883	11.917	10.847	12.5042	13.4301	13.8597	13.056	13.6245	12.8689	13.6885	13.632	14.5782	13.9012	14.5315	13.6229	13.3288	14.9666	12.3658	12.9495	13.3687	13.3187	13.5118	13.7271	11.2525
AGPAT4-IT1	ENSG00000279355.1	lncRNA	13.6804	13.5435	13.5124	13.2077	14.3977	13.8305	12.3388	10.8747	15.6719	16.0254	13.4489	14.0401	14.4181	13.5081	13.7157	15.0738	13.5608	15.2758	13.339	10.4992	13.2736	13.767	9.6932	11.2092	10.5327	11.047	10.9678	13.0295	11.8231	13.9978	14.1141	12.9353	13.6256	12.3062	13.6981	13.2157	13.0092	13.43	13.8279	14.8866	14.2032	13.6412	12.6369	13.0214	11.7878	13.7287	11.4526
ANKRD33B-AS1	ENSG00000250106.1	lncRNA	0	0	0	0	0	0	0	0	0	0	0	9.82255	0	0	0	0	0	0	0	0	0	0	0	0	0	0	0	0	0	0	9.9182	0	0	0	0	0	0	9.72411	0	0	0	0	0	0	9.82869	0	0
APCDD1L-AS1	ENSG00000231290.4	lncRNA	16.0664	10.0685	9.0899	9.88779	12.7747	8.6314	13.6491	16.2082	11.8525	9.24591	10.3764	9.90201	14.7788	10.0842	12.9268	10.9872	15.3074	8.81328	9.08118	10.6887	12.8523	10.4657	8.88416	10.329	10.3075	12.7386	9.86283	13.1236	11.1935	12.9312	10.6752	13.1249	9.78435	15.4492	13.6248	13.5669	9.29411	10.8027	10.8232	10.0452	11.4604	10.599	13.2531	11.4931	15.6589	10.4676	11.1163
ARHGEF26-AS1	ENSG00000243069.6	lncRNA	11.9872	13.2294	15.624	11.0583	16.2966	14.8289	14.9383	13.665	16.3668	15.062	16.619	14.7387	14.6492	15.5253	16.0081	15.3803	15.5873	13.7751	15.5667	16.6454	13.8765	16.7585	15.927	15.4379	16.4525	16.7077	15.9939	15.2239	17.4895	16.3883	15.8607	13.9582	13.2935	15.8419	16.4127	15.5908	16.3469	14.9461	14.1094	15.5129	16.2664	16.3557	15.5229	15.7813	15.4998	16.133	15.8131
BLACAT1	ENSG00000281406.1	lncRNA	12.1232	13.2791	14.0322	13.1696	13.6754	12.1579	10.082	11.2016	11.7864	10.1896	13.566	12.5492	11.6545	10.2216	12.7048	13.8913	12.4895	12.0689	13.4856	10.2415	13.4658	0	11.4785	14.8159	9.86045	0	10.2954	13.0137	12.9574	11.9864	12.3512	11.7887	10.2169	12.4813	11.926	13.2605	13.5222	11.7878	9.29922	11.1148	10.309	9.99996	11.1802	10.0696	11.4776	12.1893	10.3652
C1R	ENSG00000159403.14	lncRNA	21.7599	19.0767	19.219	20.6605	20.2579	22.0496	21.189	20.6314	18.8306	19.2455	19.7929	19.3518	20.0701	19.4626	19.9494	18.0067	20.087	17.3776	18.0534	21.5358	17.4096	17.8465	17.2586	16.9346	20.525	19.5954	20.4635	22.185	19.4062	22.0281	19.5858	23.2204	19.5224	19.5401	19.864	20.8923	17.018	19.7315	18.4732	21.0792	18.1956	20.2994	18.782	19.731	20.1559	17.9255	19.8533
CASC19	ENSG00000254166.1	lncRNA	0	0	0	10.3161	0	0	0	0	0	0	0	0	0	0	0	0	0	0	0	0	0	0	10.0482	0	0	0	0	0	0	0	0	0	0	0	0	0	0	0	0	10.3361	0	0	0	0	0	0	0
CASC21	ENSG00000253929.1	lncRNA	11.7908	0	10.5936	0	11.6174	0	11.6417	10.5699	10.6954	10.7498	13.8809	10.6698	10.4994	11.5888	10.3457	0	11.9831	10.5795	0	0	12.7463	14.1401	10.3876	13.9038	13.227	11.157	0	12.0243	11.1965	0	11.7651	0	10.4147	12.3574	11.4867	12.4191	11.3827	0	12.2501	12.9969	0	0	0	10.6297	0	0	11.5626
CCAT1	ENSG00000247844.1	lncRNA	0	0	0	0	0	0	7.77051	0	7.82353	0	9.26873	0	0	0	7.4753	0	0	0	7.49217	0	8.28839	9.67941	0	0	0	0	0	0	8.32295	0	8.89034	8.11415	0	0	8.61251	0	0	0	8.79073	0	9.21584	0	0	0	0	0	7.69174
CDC37L1-AS1	ENSG00000273061.1	lncRNA	15.0325	14.5473	14.2134	15.8228	15.5144	15.3388	14.649	14.6591	15.5689	13.7567	14.2864	13.9815	13.3256	14.209	13.7243	12.7563	14.1254	14.9582	15.6037	16.4111	16.2106	14.2826	13.6287	14.9234	14.8475	15.8045	14.967	14.1141	15.0702	14.6461	15.6391	13.3661	14.7933	13.5254	14.7988	15.7984	14.9463	14.8829	14.3925	14.7243	16.1608	15.2867	13.8828	15.3039	15.0216	14.3439	13.4824
CDKN2B-AS1	ENSG00000240498.5	lncRNA	13.8445	10.2939	13.9947	14.3057	11.2763	12.6609	14.3157	7.71104	8.8329	9.47113	10.5024	14.6559	14.0087	8.7269	9.65147	9.83516	14.1029	13.482	11.0823	9.06806	14.1912	9.69197	10.6101	13.4214	9.36421	8.8796	8.21723	11.8034	7.33995	9.98805	6.91191	12.4437	13.407	6.50826	10.7921	10.8767	14.0566	15.3055	14.8662	9.81154	14.7652	13.6173	6.52848	8.35338	14.5585	8.60839	7.70426
COX10-AS1	ENSG00000236088.8	lncRNA	14.3692	14.646	15.5756	14.2763	14.4488	14.1724	13.8087	14.0174	14.9289	14.8117	13.8373	14.934	14.8164	14.903	14.5892	14.7074	14.6148	15.1546	14.3239	14.583	14.8345	15.4536	14.6243	14.4591	14.0078	14.1878	14.2252	14.6768	15.0048	14.6542	14.7721	14.2103	14.1612	14.7356	14.3407	14.1712	15.3002	14.4776	14.4692	15.0056	13.8141	14.0733	15.0685	14.7069	14.2701	14.7777	14.693
DGUOK-AS1	ENSG00000237883.1	lncRNA	15.5357	13.34	13.4756	15.4531	15.8732	13.9489	15.042	14.9466	15.3078	15.0052	15.3221	15.3777	14.9218	13.8698	13.8124	14.7068	14.9709	14.6744	14.8935	14.6464	14.7545	14.5634	14.1319	13.8417	13.1098	13.4868	12.2378	14.1478	14.0787	14.3903	14.7117	16.1376	15.4809	13.3656	14.717	15.8422	13.9756	14.5484	12.7889	14.4557	14.6017	15.4337	12.8011	14.2222	14.8264	14.1024	14.1555
EDRF1-AS1	ENSG00000236991.5	lncRNA	10.0139	8.68271	10.623	10.4628	10.8398	9.9417	10.4494	7.79755	10.7248	11.1416	10.1042	12.0613	11.9688	10.6187	10.7374	12.9911	9.62169	12.1229	10.5846	8.83351	10.9689	11.7775	9.61046	10.3195	8.45305	8.3828	7.72117	0	8.42214	10.0749	10.5727	9.21086	10.9584	10.1654	11.0309	7.6481	10.9269	10.3785	10.2101	10.4828	10.8986	9.00643	8.60339	9.43795	10.4832	10.8623	10.3703
EPB41L4A-AS2	ENSG00000278921.2	lncRNA	12.4304	13.8339	14.3479	13.1951	13.3499	14.699	14.7665	13.1093	15.0124	14.7856	14.1497	13.4463	13.4408	13.4912	14.2869	14.7387	15.175	15.2183	14.3039	14.6631	15.7014	13.4579	14.228	14.1868	14.386	12.6968	14.2475	14.0423	13.3882	14.9766	15.4748	14.4741	15.3462	13.675	14.389	13.5093	15.285	14.7627	13.3047	14.0515	14.6566	14.9738	14.8787	14.1946	15.1084	14.0851	13.5046
FAM201A	ENSG00000204860.4	lncRNA	10.2319	12.9175	8.45215	11.3851	11.6951	10.9892	13.2694	9.84093	8.55375	9.82829	12.0775	11.1099	9.77047	9.44575	11.9373	8.23663	11.5266	10.0202	13.4394	9.46566	10.2401	9.82703	8.24664	13.6147	8.50122	7.43515	10.2233	8.29894	10.0526	8.54076	7.04605	10.2579	11.8939	6.64205	13.6636	9.27649	10.9013	8.84393	11.5796	11.1937	0	7.06276	8.65158	6.91125	9.75452	10.5482	6.84515
FAM225B	ENSG00000225684.3	lncRNA	13.4377	10.307	7.92386	11.5951	12.5123	13.5354	9.13902	12.8251	10.2689	11.8295	11.0141	7.00546	8.82684	9.08614	7.67688	12.5221	9.53231	9.60606	11.7316	9.39508	10.2949	10.2034	8.03919	9.59334	13.2104	6.49768	8.40669	13.0636	13.1651	8.59546	13.6675	10.4001	8.32836	14.4306	13.1515	12.8423	9.61616	7.90168	13.5901	11.9073	10.2246	8.43289	13.6098	9.95551	10.6451	12.0619	13.3874
FAM83H-AS1	ENSG00000203499.9	lncRNA	13.3797	9.98158	9.11831	13.1552	12.6948	10.2424	11.165	11.4848	10.0263	10.2732	14.0362	9.51589	10.0229	9.11397	9.67673	9.7086	14.6351	9.91042	10.4706	8.13644	9.68597	0	9.71863	0	0	8.68295	10.6012	9.54892	10.305	9.37666	9.61151	13.0641	10.1079	10.9684	10.8174	9.26612	9.7143	12.7084	10.3589	12.1981	7.62121	11.627	6.91266	10.7377	11.1057	10.9002	8.09049
FBXL19-AS1	ENSG00000260852.1	lncRNA	13.8553	13.596	13.1646	13.545	12.9783	12.8571	13.0632	13.3556	13.7467	13.4728	14.3144	14.6558	13.9399	13.375	13.862	13.8277	13.5723	14.3497	14.3484	13.5952	13.543	12.9571	13.8947	13.0008	11.9827	12.433	12.8943	14.0504	12.8542	12.543	12.3188	13.9048	13.2896	13.0811	13.8057	14.0854	16.1474	13.9213	14.8741	14.1162	12.4929	13.755	13.3778	12.3529	13.5218	13.6323	12.5492
FEZF1-AS1	ENSG00000230316.5	lncRNA	16.1983	8.53196	10.4017	13.207	9.91179	13.5966	13.8416	9.37905	13.4286	12.6275	17.3991	9.47889	8.57317	8.66283	13.9905	10.4485	12.6119	9.3886	11.8923	14.8154	9.64896	11.6265	16.7117	10.905	8.71626	16.453	11.6225	14.2515	13.5148	10.7533	9.57451	15.3365	10.9878	8.43228	15.0808	14.5773	13.9557	14.2561	10.4738	14.0435	13.5542	9.26987	6.87592	12.2026	12.7463	9.5424	9.37224
FOXP1-IT1	ENSG00000242094.1	lncRNA	8.18615	0	0	8.05096	9.59456	0	8.03758	8.54857	7.09592	0	6.96124	7.07051	0	6.9905	0	0	7.79507	6.98078	6.76565	7.01028	8.5558	8.94876	0	0	0	0	0	0	0	0	0	9.70078	0	0	7.88313	6.8224	0	6.97271	0	8.07092	8.48564	8.76062	0	0	0	8.44939	0
FUT8-AS1	ENSG00000276116.2	lncRNA	14.072	12.154	12.2021	12.7235	12.4742	12.6494	12.3381	12.5002	11.4741	12.3583	14.3379	11.2786	13.5671	12.59	12.3463	12.4453	13.7074	12.9952	13.3631	13.9454	12.6774	11.7495	11.996	12.513	10.422	12.0878	11.6867	12.2183	12.6125	11.6834	13.1289	11.5959	12.8303	12.4901	13.0955	12.4876	12.2395	13.465	12.7336	13.5319	10.286	11.561	12.5719	11.8233	12.9848	12.2488	11.6311
FZD10-AS1	ENSG00000250208.5	lncRNA	9.73085	10.8211	10.4138	9.15542	11.0633	15.0384	9.58192	9.06982	11.9856	10.2989	10.6768	10.0616	10.8048	10.2803	9.68101	11.068	9.54994	8.97266	10.9111	10.8234	9.43903	8.83399	8.66586	8.95995	9.09023	9.01992	9.27285	9.03944	10.0579	7.9631	9.54491	9.48652	10.3151	12.2867	11.0846	8.81327	10.4316	8.43531	10.2149	11.1991	9.36878	8.47641	7.07912	11.568	8.17826	10.3709	9.71412
GPC5-AS1	ENSG00000235984.4	lncRNA	10.123	11.7888	9.92545	9.98743	15.4718	0	0	0	10.0272	0	9.89164	0	9.8313	0	0	0	0	0	11.2784	0	12.4927	0	0	10.4286	0	0	0	0	12.5274	10.5987	0	0	0	9.69018	0	9.75177	0	0	0	0	10.4232	0	0	16.688	0	9.80242	0
GRM7-AS3	ENSG00000226258.5	lncRNA	0	7.10932	0	0	0	0	0	0	7.34518	8.39497	0	0	0	0	0	7.02929	0	0	8.59197	0	9.39001	0	0	0	0	0	0	0	0	0	0	0	0	0	0	7.0713	0	0	7.31568	0	0	0	0	0	7.32584	0	0
H19	ENSG00000130600.14	lncRNA	18.4871	12.1733	15.594	18.1683	13.2637	15.3648	12.4018	15.367	15.172	16.0498	17.0821	18.8278	16.8618	11.3922	17.6548	13.9504	11.699	17.8775	12.2476	12.7838	17.2191	15.0783	11.8032	14.778	15.2095	18.9729	20.5055	18.2447	14.7447	13.1524	21.3918	11.9505	12.7736	18.8601	15.9503	14.1005	12.3463	12.5719	11.9661	11.976	12.7138	14.7166	19.012	18.3925	12.7835	14.6449	18.6617
HCG11	ENSG00000228223.2	lncRNA	14.6064	13.1545	12.3704	14.649	14.807	13.8712	14.0422	15.1593	15.2341	12.7766	15.9374	13.2815	13.6812	14.2753	14.0419	13.1734	14.9545	14.3364	14.389	13.6026	15.4571	12.9306	13.2584	12.8344	12.1874	12.2482	13.6149	15.9756	12.2877	13.12	12.5028	14.1691	13.7232	12.5978	13.2243	14.5104	13.4738	12.9199	12.3206	13.3514	12.3595	13.7247	12.3721	13.9111	16.2002	13.5612	15.2543
HHIP-AS1	ENSG00000248890.1	lncRNA	13.9806	13.8905	16.2608	14.9716	13.4404	14.6859	14.2828	16.3342	15.0901	15.7755	13.4919	14.6873	14.613	13.5901	13.8027	15.1016	13.6457	16.3487	14.5068	12.1839	14.6192	15.5228	16.5913	14.3722	12.8024	10.3178	15.3896	12.4069	15.0001	12.6494	13.1476	13.0213	17.6202	15.02	15.691	12.8523	14.7778	13.7005	14.5257	13.4982	14.4736	12.8807	11.2755	15.704	11.251	12.7455	12.1378
HNF1A-AS1	ENSG00000241388.4	lncRNA	8.06171	6.7366	7.86478	6.93248	8.8859	0	8.9102	6.84745	7.96623	7.02597	0	9.25914	9.57357	6.86664	9.41994	8.23215	7.67077	8.84756	7.63472	8.46322	7.43543	8.82414	7.65958	8.95009	8.49674	7.43068	9.34532	0	9.04943	7.54016	8.03611	0	0	8.21288	7.7588	6.69866	8.65168	9.16075	6.94255	8.94359	0	0	0	6.90679	8.52987	7.74217	7.83438
HNF4A-AS1	ENSG00000229005.2	lncRNA	9.13999	0	0	0	0	0	0	8.91897	0	0	0	0	0	0	0	0	0	0	0	0	0	0	0	0	0	0	0	0	0	0	0	0	0	0	0	0	0	0	0	0	0	0	0	0	0	0	0
HOTAIR	ENSG00000228630.4	lncRNA	14.6362	13.9499	17.5147	10.2977	8.45556	12.5529	9.06346	8.40773	16.1801	10.5844	10.5642	16.2382	14.7759	9.42493	14.5101	17.2082	7.24184	9.00082	14.5798	9.76636	8.9985	10.3906	16.8703	9.93229	0	15.3219	9.9132	15.5095	12.6744	16.1122	8.60292	12.465	12.5703	15.1342	14.275	12.5755	16.2223	11.4929	13.0231	13.5755	10.2484	9.61788	15.262	13.2448	13.1822	13.1622	13.8725
HOTTIP	ENSG00000243766.6	lncRNA	8.26765	9.6684	6.49633	9.86579	7.51246	8.60943	0	6.47289	6.59712	6.65097	0	0	0	7.48399	7.24173	0	8.28998	11.1672	9.05919	8.49984	0	10.4437	7.28341	0	7.12481	0	6.39704	6.92348	9.40748	8.15913	9.23964	8.46298	0	0	0	7.89742	10.4407	6.4743	7.56013	10.885	7.98412	8.25881	8.26986	6.53208	0	8.3615	9.25945
HOXA11-AS	ENSG00000240990.8	lncRNA	12.1042	12.6505	11.3503	11.3249	7.2958	11.9731	9.31321	11.4091	12.4089	11.2266	0	8.92653	10.3391	9.26032	12.9451	10.9537	8.07278	15.5336	9.35531	8.28255	9.8324	12.3949	11.757	9.35312	7.90253	7.83238	8.75019	11.3946	0	11.8434	12.7565	11.4638	7.0939	10.8349	11.7412	12.043	15.0462	8.2448	9.33675	13.554	11.346	9.03889	10.0486	10.6213	8.34917	12.3094	13.9733
HOXC-AS3	ENSG00000251151.2	lncRNA	9.9545	11.2833	12.3801	7.24196	9.51852	0	7.22862	0	13.1304	7.33559	0	11.569	9.07877	7.17601	9.92374	11.9545	8.56422	8.16125	11.2617	9.50985	8.74222	0	10.7724	10.4823	7.81096	9.73576	8.65845	11.1872	9.77516	11.652	0	8.56782	0	10.8425	10.872	12.2822	14.3175	10.1493	9.8291	10.9536	0	8.9471	11.1258	9.53038	13.5567	11.2177	10.1411
HOXC13-AS	ENSG00000249641.2	lncRNA	12.3185	12.0848	16.7012	0	9.33965	10.4397	0	8.29405	13.907	8.4735	8.28395	13.9131	9.22132	8.31334	9.65181	14.2263	8.12343	0	13.6968	10.3299	9.88318	0	11.8078	10.4028	8.95024	12.6844	9.21514	15.853	12.376	16.5339	0	11.2924	9.13671	13.6627	14.1137	11.7247	14.817	9.29318	10.7081	10.3963	0	8.50599	10.9062	10.6721	0	9.19246	9.86913
KCTD21-AS1	ENSG00000246174.6	lncRNA	14.3458	13.9136	13.2325	12.5357	12.1551	11.8988	13.4364	13.5042	12.5189	13.7495	13.5466	13.2923	13.2487	12.1265	12.5024	13.4517	14.8307	13.2019	13.8273	12.6714	13.6991	13.9053	13.8337	13.3428	13.1077	12.5848	13.2726	12.0119	14.6523	12.7324	14.1739	12.9481	11.5486	13.4202	11.9888	14.2926	14.4205	13.1431	13.5177	12.9427	13.1781	13.1714	13.7077	12.0189	12.9848	12.4574	13.2504
LINC00114	ENSG00000223806.6	lncRNA	9.02764	0	0	7.89526	0	9.95407	0	0	0	0	9.38043	0	8.73628	7.82915	0	8.61463	8.63587	7.8194	10.1822	0	0	0	7.6283	0	9.46335	0	7.7335	0	9.4324	0	0	0	0	0	0	0	0	0	7.90537	0	0	0	0	0	7.91555	0	0
LINC00265	ENSG00000188185.10	lncRNA	13.8572	15.0036	15.6635	16.2492	16.3989	15.1004	14.52	14.7364	18.0824	17.9069	16.0376	16.31	16.1819	16.6651	16.7171	17.4057	16.1724	16.9033	15.4987	14.2167	15.076	15.2593	15.4002	15.2411	15.9667	13.0534	14.8354	15.6916	14.8042	14.7722	16.6772	14.8467	15.7468	16.5338	16.0211	14.971	17.2121	16.1732	15.7196	16.7985	17.4699	15.7785	15.3319	14.9917	15.1867	16.3954	15.8785
LINC00319	ENSG00000188660.3	lncRNA	0	0	0	7.79742	6.76646	0	0	0	6.84337	0	0	6.818	0	0	7.48883	9.10027	7.54173	8.30426	0	0	0	0	0	0	8.36742	0	0	7.17021	0	0	0	0	0	6.50927	0	0	0	0	0	0	0	0	6.52949	0	0	7.6131	6.71218
LINC00323	ENSG00000226496.2	lncRNA	12.178	11.0861	12.475	12.8682	12.9712	12.4536	14.1691	11.3047	11.7103	11.1369	13.8962	12.352	12.5558	11.3241	11.5208	12.349	9.91207	12.4608	13.7813	11.1217	12.1768	11.0685	10.7746	14.8697	8.15973	9.08689	12.5078	13.0394	13.4814	12.5869	10.0159	9.50113	14.3303	11.8089	14.6236	13.5756	12.8338	10.669	8.59644	11.9249	8.02421	12.102	11.0066	10.7274	12.3037	10.3984	9.49199
LINC00342	ENSG00000232931.4	lncRNA	15.6273	15.6535	15.9419	16.4519	17.3037	15.0674	15.4036	14.4171	18.2422	17.8807	16.1461	17.1528	16.6164	16.5739	16.2524	17.9982	16.4207	17.2116	16.4015	15.4619	16.1213	16.4682	15.367	14.8878	15.6819	12.5673	14.0459	15.259	15.8094	14.7504	17.47	15.8673	15.7824	16.5943	17.0601	16.6854	17.0596	17.3224	15.3423	17.0779	18.2541	15.8834	15.5783	15.5525	15.1374	16.3827	15.6916
LINC00460	ENSG00000233532.4	lncRNA	16.1403	10.0534	10.6036	14.0571	12.5341	13.5356	11.2368	17.6953	11.2901	9.76061	11.7392	8.68246	14.2634	10.921	9.35676	13.7789	8.412	11.1741	14.0995	14.8851	16.8647	0	10.3976	10.1076	9.23922	0	12.9618	13.4264	14.0639	10.8622	9.77633	13.9964	11.0093	11.827	12.8183	14.1838	10.3933	8.58415	12.4825	9.68649	10.6866	0	11.9729	13.3938	13.1447	13.0032	12.3798
LINC00473	ENSG00000223414.2	lncRNA	12.8975	6.55703	13.3638	9.06386	6.71525	12.1249	9.89725	0	7.78562	9.42054	6.65771	11.0761	7.59044	6.68691	8.01962	10.6318	9.06993	6.67721	9.61782	11.9411	9.56952	8.64318	0	9.1833	0	8.82904	6.59178	8.11369	9.60414	11.6734	6.86167	11.3193	12.4984	8.7669	7.5783	8.50729	7.47484	6.66916	9.55866	9.93067	7.18528	6.87837	9.04979	10.2994	12.7822	12.3092	6.66099
LINC00601	ENSG00000235180.1	lncRNA	14.5619	10.77	10.9054	14.1684	13.5613	14.0302	13.9169	13.8811	14.4921	13.3241	15.4193	11.8294	15.3834	12.9709	14.5826	12.7591	14.2706	11.5691	13.306	14.7277	14.4733	11.5456	12.2838	10.0877	11.2175	11.9542	14.6321	13.3361	16.0314	14.6489	12.6619	14.186	15.9507	13.4766	14.2313	16.0162	9.95869	15.0035	12.5621	13.9869	14.0352	13.9416	12.6158	12.867	15.0575	13.2146	13.5967
LINC00619	ENSG00000204187.5	lncRNA	15.8285	0	0	8.70752	8.66983	0	8.69412	10.2045	10.33	8.80153	9.61002	8.72172	8.55162	9.63947	9.39606	0	10.0334	8.63151	9.99726	10.6585	10.2117	0	8.44003	0	0	0	0	0	10.8309	0	8.81724	11.3582	0	8.41073	0	9.47018	0	0	11.0368	9.7258	9.14272	9.83246	8.43112	9.67992	0	0	8.61517
LINC00632	ENSG00000203930.9	lncRNA	13.2488	14.2424	14.5127	11.9243	12.9704	13.5915	10.4376	13.6038	12.0207	13.3286	14.261	11.687	12.6475	11.4621	12.0995	10.9094	10.8312	15.8259	15.1468	9.82015	15.0719	15.0133	14.2787	12.5798	7.85839	12.1743	9.44156	10.82	12.4653	9.89333	11.0911	12.0043	10.7403	13.8529	13.7555	12.927	12.7082	9.51961	14.8752	14.3336	10.0394	15.3494	8.59162	10.2553	9.88691	13.3618	9.77408
LINC00648	ENSG00000259129.4	lncRNA	0	13.605	7.21108	10.4343	9.22798	13.9707	7.25937	8.18257	12.6957	13.3801	0	11.0856	10.2781	0	9.95466	8.98796	13.1151	15.6989	13.4132	8.22174	15.1362	11.4861	14.6605	9.2922	7.84178	11.2251	0	10.2188	11.8049	0	11.3739	11.6829	9.83123	11.9661	11.4173	8.03296	7.99648	11.2671	13.8128	14.3709	11.7873	10.8504	7.9919	7.24698	11.0917	13.4181	7.18076
LINC00844	ENSG00000237949.1	lncRNA	16.3763	17.7107	18.8463	15.4287	19.942	18.4096	18.8688	14.9385	19.2712	17.0083	18.7327	18.3604	16.5084	18.1742	17.4659	16.9159	18.6282	20.1915	20.0045	19.6847	20.2213	21.3548	20.5512	21.3224	17.8665	17.1527	16.9838	16.2368	20.359	19.3527	16.761	15.4779	18.1755	16.8389	19.5496	18.9054	19.7127	17.7042	18.4308	18.8964	17.7652	19.6182	17.3462	17.6524	17.0552	18.2554	18.1016
LINC00960	ENSG00000242516.1	lncRNA	13.1932	15.9791	12.3855	13.1768	12.7468	12.2631	11.9412	10.6994	13.5247	13.0217	12.6887	13.168	13.0876	12.9145	12.6174	12.6218	12.8495	16.1676	12.8133	12.6767	15.4938	15.9199	11.4552	12.3961	10.5798	10.7019	11.6223	12.2693	11.2005	10.9818	13.833	11.9237	15.895	12.9243	11.8386	12.6641	12.5995	12.2853	16.0233	15.8341	13.9754	12.684	12.6229	11.4219	10.0285	13.7557	12.014
LINC00987	ENSG00000237248.4	lncRNA	12.869	13.9656	13.6305	14.3961	15.1693	14.019	14.7882	13.8869	14.0294	14.503	15.7892	13.5548	13.8499	14.3672	14.2531	14.8164	14.0342	15.2879	15.1092	15.3809	17.0975	12.9231	13.8649	13.4967	12.7794	13.8978	12.9858	13.8394	13.6894	14.2835	13.0996	13.0242	12.9661	12.8204	15.7784	15.179	13.9201	13.7457	14.7433	14.2271	14.5992	15.1079	14.0935	13.8593	12.3387	13.5074	13.2781
LINC01012	ENSG00000281706.1	lncRNA	8.2062	10.7757	12.0483	9.65238	9.0306	9.13162	9.8611	0	10.1068	7.16991	10.2928	11.7807	8.91232	8.00485	11.6628	12.3422	11.8091	11.7447	11.6309	7.03024	9.15956	8.96883	6.81034	12.1514	0	7.57488	0	12.2931	8.61044	10.6783	0	7.40577	12.4098	10.7689	9.89863	10.4157	8.79634	6.99267	12.3614	8.67415	9.82524	7.20227	7.795	8.04519	0	11.4045	6.98449
LINC01033	ENSG00000249069.6	lncRNA	10.2561	13.5847	9.47426	8.53817	9.4985	0	8.52478	10.0349	0	8.63215	9.44047	9.55044	0	0	0	9.2584	9.27965	8.46219	10.564	8.49184	10.0421	0	10.2673	8.97873	9.10902	10.6218	9.37397	12.4887	0	9.14859	0	11.4514	10.8789	0	9.36796	9.88485	9.2641	8.45407	11.7148	9.55623	0	10.9837	9.25951	0	10.1409	8.35349	9.44378
LINC01117	ENSG00000224577.1	lncRNA	13.4282	11.9956	12.1311	13.2925	11.6701	14.034	11.6944	12.8849	14.7829	9.48174	9.2919	0	10.815	10.9048	9.07801	12.4294	10.1298	13.7688	13.2624	9.34125	14.2843	13.6079	13.8178	14.471	11.958	11.8875	0	12.9248	11.5121	15.6411	9.49746	12.7173	13.8994	10.6738	10.2182	12.1499	13.8135	0	14.4401	14.691	14.0696	14.3197	15.2581	13.6076	14.1064	14.9282	11.2935
LINC01123	ENSG00000204588.5	lncRNA	9.28656	8.5398	10.8946	8.73692	9.1134	11.2126	7.14537	0	10.6487	10.244	11.2232	8.75112	10.1635	11.783	10.0098	0	9.4786	9.07506	11.9432	8.10735	9.65681	0	6.89257	0	0	0	0	7.52565	9.69144	9.34752	10.8443	7.48824	0	6.86344	8.98292	9.23698	11.9639	0	0	0	0	8.28004	7.87759	9.9315	7.17894	12.2491	8.06141
LINC01139	ENSG00000215808.2	lncRNA	13.8108	12.2993	11.8875	11.8341	13.0691	10.3133	10.5582	11.3335	10.6114	11.8028	11.1535	11.071	11.4149	12.9899	10.7468	12.1407	11.1623	12.1729	12.7631	12.3725	11.0778	11.1497	9.98196	12.1501	9.82245	8.75375	10.6721	9.6198	12.697	11.6683	10.9444	12.9025	10.0091	11.9515	10.6661	11.1834	9.97763	11.165	10.5818	10.2699	12.592	9.96196	11.557	13.5084	8.27378	11.0642	12.0634
LINC01150	ENSG00000229671.1	lncRNA	12.6713	15.0383	12.4736	16.9617	16.2526	16.7688	17.0139	15.6976	15.4333	15.3846	16.5688	14.6372	15.3334	14.639	14.9258	13.7167	15.8932	15.8168	14.6346	16.5114	12.6271	13.4359	14.8522	14.8839	14.1076	15.681	15.3272	16.3309	15.4689	16.9286	14.2304	15.5109	15.2944	14.1448	14.1744	16.6033	13.5849	13.7731	14.6331	15.5999	12.5567	16.4696	14.4283	13.0946	15.1408	13.9353	14.8352
LINC01152	ENSG00000256124.4	lncRNA	13.9047	15.061	14.3078	14.5274	15.3827	15.0954	14.3644	15.0384	15.1919	13.8512	16.1713	15.2382	15.4838	14.1086	15.1444	15.0916	17.6198	14.7574	14.831	15.8518	15.7172	15.7282	16.1465	13.7466	16.2221	16.4617	15.1466	15.1139	15.6511	16.3716	14.6725	15.1244	15.5752	15.1267	15.9882	14.9299	17.3643	16.5899	16.2009	15.3209	16.3642	16.2533	15.421	15.2068	15.0574	15.3842	15.9886
LINC01163	ENSG00000280953.1	lncRNA	0	9.99909	8.13837	0	9.74416	10.2599	0	0	8.82328	0	8.68787	11.38	0	0	0	7.92301	6.95006	7.12944	8.49109	0	8.70521	9.09826	7.93301	10.6378	0	7.7039	0	0	8.73979	0	7.31436	0	0	0	8.03231	6.97092	6.9346	7.12137	0	9.80191	0	11.2296	6.93004	7.17938	7.22534	9.01288	0
LINC01169	ENSG00000259471.1	lncRNA	0	0	0	10.7183	10.096	0	0	9.04943	0	9.2291	0	9.14924	8.97902	0	0	8.85733	0	0	8.84242	0	0	12.0331	0	0	9.70631	0	0	9.50368	0	0	0	10.4651	8.89443	0	0	10.4825	8.86303	9.05086	11.9503	0	9.57046	0	0	9.10917	0	0	0
LINC01216	ENSG00000250223.1	lncRNA	0	0	0	0	0	0	0	0	0	0	0	0	0	0	0	0	0	0	0	0	0	0	0	0	0	0	0	0	0	0	0	0	0	0	0	0	0	0	0	0	0	0	0	0	0	0	0
LINC01219	ENSG00000232987.1	lncRNA	0	0	9.27905	9.341	11.3016	0	9.3276	9.25538	9.38078	0	9.24527	10.9387	10.1837	0	0	10.0619	0	0	9.04832	0	0	0	0	0	0	0	0	0	0	0	10.4498	9.67216	0	12.7418	0	0	9.06894	9.25681	0	11.3594	0	0	0	9.31514	9.36135	9.1561	0
LINC01270	ENSG00000203999.7	lncRNA	13.2956	11.4724	12.0228	14.0974	14.6318	12.3409	13.2639	14.0984	12.8718	11.4594	14.3412	11.6842	15.1816	12.9923	12.6111	11.4589	14.1902	10.2022	11.5694	13.8747	11.1062	11.4999	14.1486	12.1114	13.2418	12.8665	12.7873	12.3471	13.701	13.8663	13.4317	13.3094	12.7368	13.5647	12.109	13.8227	12.2144	13.8654	11.0953	13.6549	12.8427	13.4485	11.8078	12.8953	13.927	11.2625	12.9921
LINC01322	ENSG00000244128.4	lncRNA	10.1105	12.5835	15.7317	10.2966	14.2396	12.0373	15.1099	11.6956	11.1839	12.238	12.2703	13.8459	10.6255	13.8141	14.7295	10.0186	14.4446	14.7303	14.7138	14.4663	15.8809	15.0032	14.6827	16.334	15.6954	9.47724	12.8113	12.7353	12.8368	10.5863	14.7418	0	13.9994	15.5586	11.3905	12.3229	13.2861	14.9661	13.6562	11.1641	9.99602	11.8012	10.5048	14.5916	8.99675	12.6465	13.2031
LINC01351	ENSG00000237457.5	lncRNA	11.3103	17.085	18.5577	14.8371	17.6066	16.5594	17.5414	14.6327	16.1988	18.067	17.3134	18.0992	14.387	15.1374	15.9794	13.8345	16.902	18.1818	17.6796	16.8914	18.4398	18.0593	17.8127	17.8508	17.7906	18.068	17.7885	14.6022	17.2595	17.0082	18.4506	11.5062	15.206	19.168	17.7781	17.7583	17.2938	16.3377	18.0587	15.7384	17.365	16.1422	17.9985	13.8112	15.7794	17.9737	18.2176
LINC01352	ENSG00000238078.1	lncRNA	12.9675	12.4278	11.1852	14.3842	13.5309	12.5734	11.9117	12.7461	13.9189	13.5427	14.5838	12.3987	12.7686	11.6661	11.4225	14.2315	13.5748	12.5492	13.6317	13.8784	0	12.8253	13.701	12.174	11.0825	13.7484	12.7625	14.5794	13.6359	13.5366	11.6201	12.064	8.68718	11.9495	13.8438	14.1483	15.6409	12.0107	8.93784	13.2668	12.3611	13.6366	12.3483	13.5428	10.9458	13.1991	11.4177
LINC01410	ENSG00000238113.5	lncRNA	14.9939	14.7961	13.5614	16.1361	15.2336	14.4167	14.7759	14.8454	15.6454	13.6639	15.891	15.9559	14.2075	14.2218	16.0875	13.3627	14.9688	16.063	14.7864	15.472	16.7322	14.9735	14.792	13.8572	13.1956	14.0713	14.4696	14.7643	13.8293	13.4923	13.8515	15.2121	14.8951	13.3606	15.1525	16.3036	16.2993	15.1758	16.3713	15.5526	14.2565	14.97	13.8956	14.0728	15.0999	13.888	13.5827
LINC01559	ENSG00000180861.8	lncRNA	8.02712	0	7.83021	6.89805	8.43725	0	7.87862	8.38942	6.93755	8.98299	7.79651	6.91216	8.733	6.83222	0	6.62238	7.63622	0	6.60759	8.4286	9.3945	0	6.63232	8.33197	7.4662	9.71122	0	0	9.42911	7.50563	7.00714	7.22717	7.65203	8.17827	0	8.97478	0	6.81445	7.9021	0	7.33099	7.02385	8.61246	8.44909	9.90778	9.51003	9.11786
LUCAT1	ENSG00000248323.4	lncRNA	13.8589	12.3034	7.27808	11.5012	15.2817	12.7164	11.9616	13.4931	12.3251	10.4261	12.8498	13.8209	15.3937	11.265	12.3429	11.5125	13.4663	13.2992	12.3233	14.9138	12.0075	11.2317	12.8957	10.0956	8.90594	9.83406	12.8409	14.4683	12.8263	15.3689	11.0264	15.9151	11.9481	11.5573	13.0694	14.7954	9.64504	12.201	9.34318	14.2934	10.9376	13.8153	10.755	11.1129	12.6733	12.5721	8.82638
LURAP1L-AS1	ENSG00000235448.1	lncRNA	11.9136	8.99779	11.7159	0	11.4772	0	9.18164	11.1075	12.4026	11.6092	10.098	12.377	11.3588	10.1275	12.2047	8.91733	8.93857	10.1177	12.0697	10.1474	11.6995	0	10.5103	10.6351	0	10.6951	12.0304	11.1474	13.1933	12.1266	0	10.5252	9.95298	10.481	11.0248	11.7644	11.9204	12.5679	11.2033	11.798	10.6296	10.9051	10.9162	10.7525	9.21539	13.0075	11.1007
MAN1B1-AS1	ENSG00000268996.3	lncRNA	15.4038	17.2565	14.7478	15.3566	15.1553	15.3853	16.9367	15.1359	15.8496	15.6131	16.2038	15.0446	15.5696	14.7683	14.9579	15.9715	15.5339	15.7336	16.171	16.9622	16.2652	15.7715	15.8859	16.4002	13.1215	13.5953	15.3332	14.8413	16.1493	14.483	15.963	14.1539	14.338	15.4741	16.7441	16.5293	16.0926	15.6744	15.7558	15.7123	15.4228	16.0627	16.2945	15.462	15.1844	15.2467	14.9486
MAP3K14-AS1	ENSG00000267278.4	lncRNA	12.0884	11.2148	12.4452	13.2005	12.869	12.9229	11.7467	11.867	12.9924	12.3688	12.7393	12.4904	12.2558	12.2786	12.4238	13.5446	13.437	11.684	13.3175	11.2284	13.1869	11.8531	11.6388	12.5641	12.3827	10.4551	11.6972	11.7814	13.4709	12.2083	11.3848	11.8079	12.0692	12.8249	12.1765	12.4172	12.4874	12.483	10.9632	12.6731	13.0325	12.2088	11.6757	11.5119	11.9731	12.6003	12.9893
MIR4458HG	ENSG00000247516.4	lncRNA	15.853	17.1932	16.2856	15.078	15.906	14.815	13.382	15.965	16.49	16.9904	15.1753	16.1962	15.49	11.8554	15.909	16.5594	15.195	16.1327	15.9955	16.6578	15.9445	13.1114	16.109	13.3631	11.3242	16.219	15.5634	16.1348	13.2235	15.5382	16.0734	15.9097	15.1029	11.5419	16.9427	15.7659	15.8009	11.755	11.9319	15.5197	11.51	15.2792	17.7997	12.2805	15.5857	17.0551	16.1143
MNX1-AS1	ENSG00000243479.3	lncRNA	10.9473	15.4713	11.0714	0	0	0	11.6053	0	12.3104	10.4911	0	13.1472	9.65637	0	8.50471	13.8547	10.8766	12.5423	14.1027	9.76608	13.0179	0	14.7716	12.9531	9.38516	0	0	11.5025	13.259	0	8.92383	9.14504	0	12.7614	11.2279	11.1606	13.5829	11.5344	13.6791	14.1529	9.24935	0	0	10.371	0	13.4838	8.72173
MYCBP2-AS2	ENSG00000229521.2	lncRNA	10.2301	0	0	11.6786	11.0561	0	0	0	10.1343	0	9.99869	11.1081	9.93834	11.0275	11.3685	12.4002	0	10.0184	9.8016	0	11.6001	0	0	0	0	10.5958	0	0	0	0	0	0	0	10.7964	11.925	9.85881	9.82223	10.0102	11.104	0	11.5298	0	0	11.6527	10.1148	9.90946	0
NCOA7-AS1	ENSG00000232131.1	lncRNA	0	0	0	0	0	0	0	0	0	0	0	0	0	0	0	0	0	0	0	0	0	0	0	0	0	10.3687	0	0	0	0	0	0	0	0	0	0	0	0	0	0	0	0	0	0	0	0	0
NDUFA6-AS1	ENSG00000237037.8	lncRNA	12.6907	12.9206	14.0991	12.9646	12.4512	12.2528	13.4412	12.6511	13.8773	13.4032	13.1344	14.1825	12.6545	13.9062	13.808	14.3754	13.3917	14.2829	13.6135	13.0862	13.7501	12.9128	13.9688	14.7117	13.5528	13.677	13.1208	12.9456	13.5845	13.7153	12.8468	11.4058	13.2364	14.0677	12.9351	13.6537	13.366	13.0044	14.0535	13.3033	13.3172	12.7032	13.0821	14.1633	13.1674	13.8271	14.0255
NFIA-AS1	ENSG00000237853.5	lncRNA	0	0	10.6408	9.11955	0	11.181	0	0	10.1581	0	10.0225	0	9.96211	0	0	8.84186	8.86311	0	0	9.07318	9.62524	0	0	10.5595	9.69082	0	0	0	0	0	0	0	8.87896	8.82257	0	0	0	9.03538	0	0	0	0	0	9.0937	9.13989	8.9347	9.02715
NLGN4Y-AS1	ENSG00000228787.1	lncRNA	0	13.3892	12.3026	11.7798	13.9896	0	13.2255	11.694	12.8194	13.0437	13.9315	12.3788	11.9453	0	10.4702	11.5016	11.8447	0	13.2937	0	0	0	12.8333	0	0	0	0	12.7338	0	10.3922	13.5899	14.0179	13.8603	0	12.6111	14.0671	12.0921	12.0173	13.4901	13.259	10.2167	13.3657	9.50421	13.3385	0	11.5946	12.687
OPCML-IT1	ENSG00000254896.1	lncRNA	7.4589	11.9757	10.5758	0	9.60101	11.7008	7.31069	8.23404	0	9.99561	8.22394	9.33147	7.16876	7.25805	8.01046	7.0477	0	13.1216	11.8296	7.27787	14.6919	10.2165	7.05767	11.0792	9.47411	0	8.74085	7.69123	7.86233	0	10.0113	0	8.07928	9.60424	9.14904	10.2502	0	8.23547	12.4547	11.0362	0	9.02954	9.36199	8.2937	0	9.45378	9.54628
PAPPA-AS2	ENSG00000226604.2	lncRNA	13.021	12.3044	12.9163	11.8855	11.2629	0	11.2873	12.3522	13.6906	11.243	9.88385	10.8006	9.409	8.9148	11.369	9.7017	12.6757	13.5168	10.2712	7.93765	12.1854	10.8793	10.7109	11.0055	0	8.48391	9.40282	10.3485	12.607	12.2907	10.4112	12.3101	0	11.3816	13.5647	10.5506	11.5135	10.8946	11.1589	13.1683	13.1693	12.8057	9.70281	9.95376	10.8067	12.7001	0
PRRT3-AS1	ENSG00000230082.1	lncRNA	15.4087	14.1299	13.318	16.0644	14.8202	13.2211	15.5364	15.8087	15.6124	15.2214	15.4074	15.7962	14.5456	15.5936	15.1451	15.0492	14.1736	14.9558	14.3238	15.8299	14.5385	14.7948	12.4745	15.5687	15.0516	12.0745	15.138	15.0711	15.9963	15.9917	16.0224	14.2965	13.2385	12.7346	14.726	13.6587	15.0549	15.4424	14.3901	15.5926	16.2181	13.2845	15.4247	14.5009	15.5471	14.4749	16.0346
PSMG3-AS1	ENSG00000230487.6	lncRNA	15.5534	15.1883	15.4381	16.3871	15.5119	16.7197	16.8214	15.9917	16.4282	15.8613	17.4747	15.143	16.1995	15.6911	16.7402	15.2379	17.0804	15.1106	16.0664	15.7839	14.2773	14.1458	17.8112	15.1701	15.6527	15.4238	16.5699	16.1996	15.1892	16.0725	16.2387	16.7505	14.9684	16.4082	15.804	16.0135	16.9157	16.1719	15.1478	16.5719	16.2258	17.2459	15.4591	15.8333	16.3938	14.8831	17.0391
PTENP1-AS	ENSG00000281128.1	lncRNA	10.7863	13.1893	14.2123	11.0655	12.4867	12.7134	10.0527	10.565	13.7486	13.4071	12.6696	13.834	11.7163	12.699	12.5622	12.8742	13.3929	14.3462	13.6786	11.8261	14.9288	14.4246	0	14.3138	9.63873	14.776	8.90532	13.6041	13.5129	14.4315	13.8753	12.7186	9.82533	12.5748	12.7039	13.4729	14.8584	8.98332	14.2043	13.6085	12.671	13.2792	14.1097	12.3611	0	14.3715	12.4319
PTPRG-AS1	ENSG00000241472.5	lncRNA	13.2454	10.6734	14.5024	13.2395	14.0634	13.8512	11.2109	12.7846	14.3622	13.1345	13.744	13.7589	13.0519	13.5528	13.5297	13.5306	15.2377	12.4822	14.5208	10.9024	14.5105	9.60239	10.6029	13.4457	13.0274	10.5248	13.8687	12.3176	13.9138	11.4	13.1854	13.4413	11.3177	14.2419	14.1756	14.5358	14.5876	9.42534	14.6293	12.829	14.6909	14.1934	14.2111	14.663	13.2906	13.2566	13.7058
RHPN1-AS1	ENSG00000254389.3	lncRNA	13.9477	15.3316	12.8216	13.9517	13.8916	14.3147	13.8701	14.2011	13.2911	13.068	14.8107	13.5583	14.5009	14.2552	14.4895	13.973	14.967	13.9617	13.3366	13.7655	14.4581	13.637	15.261	13.5804	14.5238	13.186	13.5998	13.6909	13.7559	13.8265	14.8973	13.5829	15.2274	12.5861	13.6188	13.0511	14.9141	14.1848	13.7975	13.6498	13.7578	14.4991	14.4204	12.8104	14.1395	13.1705	14.7194
RORB-AS1	ENSG00000224825.2	lncRNA	10.769	0	13.8185	0	12.4024	13.281	14.5018	12.8689	12.6726	10.7276	13.4436	10.9694	14.3589	12.0259	12.9664	8.35867	13.5851	11.5568	13.0944	11.5865	10.7248	12.5331	12.2715	11.0748	0	11.9419	13.0552	11.0024	13.4957	11.2449	12.3277	10.55	13.7839	14.3574	13.8564	14.0691	14.682	13.6776	11.813	10.9752	12.7693	11.3448	10.9411	11.7769	13.6974	14.002	12.4471
SATB1-AS1	ENSG00000228956.7	lncRNA	11.2941	11.6976	11.2808	7.92672	11.3616	10.1781	8.80367	8.03319	11.4206	12.6673	9.66317	11.2157	8.7678	8.85749	8.97607	12.2105	8.85958	12.9682	12.1425	9.65372	11.9778	13.6721	10.4312	11.1703	6.69949	8.93997	10.3096	8.48669	9.82606	8.05257	9.47336	9.14802	8.33627	11.371	10.6463	10.5789	12.9959	8.20393	12.1351	12.0407	9.6388	11.7952	9.96702	6.10858	7.46393	11.1577	6.0429
SEMA3B-AS1	ENSG00000232352.1	lncRNA	15.3244	14.1431	14.6197	14.9574	15.6814	15.9566	15.8798	14.3481	16.4043	14.528	16.0383	14.3549	14.5994	14.3674	15.2529	14.615	18.0533	14.3576	16.185	18.5821	15.5252	14.3342	15.451	16.6827	12.5911	13.7429	13.9718	14.388	15.6188	15.2155	14.6313	15.2248	15.0507	15.2655	16.1233	16.0558	16.0681	16.6714	14.3509	16.7206	15.2622	16.1753	14.4046	13.5779	15.3611	14.8336	11.9265
SLC25A21-AS1	ENSG00000258708.1	lncRNA	9.06312	14.4954	7.86888	11.832	13.5309	12.3104	11.7191	9.42604	10.9653	11.1895	14.8062	10.5249	11.091	11.1809	12.0744	11.1066	9.25511	15.6365	13.1863	15.0179	13.9231	14.995	7.66368	12.2735	9.49885	10.4275	9.76391	10.2951	10.4669	11.1221	10.0361	8.26106	14.1267	10.6281	12.216	8.69232	11.1123	10.6487	15.656	10.5307	9.36303	8.05699	8.6512	11.7066	9.53203	11.1996	9.83375
SOX21-AS1	ENSG00000227640.2	lncRNA	14.2991	16.8599	16.9134	13.0349	16.5448	16.0859	16.09	16.0776	16.9977	16.8256	17.0979	16.996	16.1757	17.2581	17.1134	17.5975	16.1852	17.5797	15.0138	15.363	16.9416	16.8979	17.2304	16.0531	17.2711	15.2084	16.2796	16.6377	17.1403	16.6887	16.1987	14.0837	15.6287	17.1776	17.3301	16.3939	17.6519	16.6338	16.9121	16.1665	16.3229	15.726	16.9397	16.9685	16.6803	17.617	16.5453
SRD5A3-AS1	ENSG00000249700.7	lncRNA	12.5949	12.4368	12.35	13.6342	13.544	12.8164	12.777	12.895	15.0041	13.565	12.9169	16.841	13.4676	12.6866	12.6706	13.5666	13.1307	13.0727	13.5247	13.2529	13.5813	14.5345	13.0948	15.2179	13.1215	13.8268	12.15	11.6294	13.368	13.071	14.1463	12.9659	12.9078	13.5472	13.3138	13.102	13.8471	14.2535	13.1734	15.6619	14.2264	13.4131	13.3259	12.6886	13.6128	12.8117	12.77
SRP54-AS1	ENSG00000258704.4	lncRNA	12.832	12.9316	13.1703	13.2812	13.3365	12.4379	13.4053	12.3762	13.1691	13.0535	12.366	13.3427	13.2624	12.8315	13.0184	13.4884	13.2467	13.62	12.3292	13.1352	14.01	13.2747	13.4637	12.9859	13.1164	12.1981	12.5339	13.2671	14.5003	13.9402	13.6136	12.291	12.9407	12.8317	12.3759	13.3083	12.7457	13.5754	12.3846	12.7867	12.6179	12.5887	13.1416	12.5184	12.9797	12.944	13.1886
TCL6	ENSG00000187621.13	lncRNA	0	8.73271	6.42236	5.49973	7.02579	8.53481	8.91648	6.39893	7.10282	6.57692	0	9.06937	6.90822	0	7.48734	8.7775	7.22025	6.40838	9.26412	6.43777	12.2031	7.37653	6.2188	6.92103	0	0	0	0	8.0142	7.08989	0	7.39268	0	0	0	6.82928	5.23382	8.38748	9.18057	5.51933	7.49656	0	0	0	0	11.2371	6.97142
TM4SF1-AS1	ENSG00000240541.2	lncRNA	0	9.77603	0	8.97486	0	0	0	0	9.01462	11.3887	9.87764	8.98907	0	0	0	11.2793	8.71847	0	10.2649	10.9263	10.4795	0	8.70725	0	0	9.47569	0	0	0	0	9.08463	0	8.73433	0	10.8043	8.73946	9.7012	0	9.98357	0	0	0	8.69834	9.94755	0	0	9.88095
TTTY22	ENSG00000224075.1	lncRNA	0	0	10.0359	0	0	0	0	0	0	0	0	10.1121	0	0	0	0	0	0	0	0	0	0	0	0	0	0	0	10.4668	0	10.7092	0	0	0	0	0	0	0	11.0129	0	0	0	10.2246	0	0	0	0	0
VPS9D1-AS1	ENSG00000261373.1	lncRNA	12.4429	12.669	12.9972	15.6811	15.0325	13.1226	14.4719	15.708	15.0647	15.1977	15.0185	14.4132	15.6509	14.3502	15.2958	15.3582	14.721	15.0914	13.5733	14.1001	13.7355	12.7669	11.3763	12.5883	15.9349	10.1469	11.5974	15.5678	13.6003	11.8411	16.3188	13.1457	13.8625	15.9903	14.6719	15.052	15.1616	14.5446	13.9022	14.8206	14.5826	12.7096	13.1396	15.3278	14.3463	14.94	11.7742
WNT5A-AS1	ENSG00000244586.1	lncRNA	15.049	12.6715	14.1288	14.7269	13.8312	14.7397	14.9429	14.538	13.9962	13.1332	14.1654	14.1311	14.0346	13.6099	14.9163	13.9126	14.9695	15.4365	14.3306	15.8885	12.3756	14.0912	14.5549	13.6325	13.2485	13.178	14.2914	14.5601	12.7321	14.9401	10.9795	13.901	14.9132	13.7413	13.2855	14.491	15.5963	13.2441	14.5229	15.1369	13.3051	13.9958	11.1773	12.4282	15.1372	12.4912	14.6832
ZBTB20-AS2	ENSG00000241295.1	lncRNA	0	0	0	0	0	0	0	0	0	0	0	0	0	0	0	0	0	0	0	0	0	0	0	0	0	0	0	0	0	0	0	0	10.0558	0	0	0	0	0	0	0	0	0	0	0	0	0	0
ZFAT-AS1	ENSG00000248492.1	lncRNA	0	9.7637	0	0	0	0	0	0	0	0	0	8.97675	0	0	0	0	0	0	0	0	0	0	0	0	0	0	0	0	0	0	0	0	8.72201	0	0	0	0	0	8.97268	0	0	0	0	0	9.98146	8.77773	0
ZFX-AS1	ENSG00000234230.1	lncRNA	12.5886	11.5186	0	11.7161	0	0	13.5769	10.0463	12.1709	12.8101	11.0355	12.1453	9.97587	11.6497	9.82218	11.8529	9.87531	13.0547	11.423	14.7282	12.2224	0	9.86408	0	12.2881	12.9545	9.96968	0	11.6723	10.7433	11.2413	0	9.89119	11.8335	12.5474	11.8952	12.1804	10.0478	12.7261	11.7361	0	11.8429	10.8544	12.427	11.7365	11.9459	10.0395
2021-03-01	ENSG00000186205.11	mRNA	14.1248	15.7904	15.384	12.8283	15.1596	16.1645	14.3137	13.8204	15.1116	15.892	16.3188	14.6554	15.5381	15.4007	14.916	15.3544	13.9011	14.167	15.3565	15.4399	14.4911	14.7384	14.81	14.343	15.6566	15.1256	15.3814	15.1307	15.713	15.692	16.726	14.8478	14.8786	15.1387	15.6292	15.4816	14.8835	14.8845	12.2536	15.7294	16.0543	14.992	15.2849	15.4887	14.8359	15.2395	15.4619
2021-09-08	ENSG00000164402.12	mRNA	17.651	17.8035	18.9226	17.887	18.3224	18.6346	19.313	18.2055	19.1129	18.1116	19.3054	19.1294	18.793	19.2009	19.3309	19.8272	18.8943	19.3282	19.2984	19.1408	18.4656	18.644	19.3339	19.5527	18.8106	18.491	18.4564	18.8366	18.0499	17.9468	19.0307	18.6488	18.8839	19.0776	19.6126	18.0523	18.9701	19.064	17.4615	18.8129	18.886	18.2102	19.7255	19.0364	18.6065	19.6383	18.9178
AATK	ENSG00000181409.10	mRNA	15.4672	15.6106	14.1856	14.827	16.9353	16.798	17.2713	14.8524	15.5444	16.3817	17.3235	15.5982	15.6726	15.4567	16.5509	15.5599	15.3683	17.409	18.1038	14.9459	15.3109	14.623	12.7572	18.0066	14.6484	13.4468	14.8981	15.3415	15.2557	12.4278	15.4309	14.1845	16.7125	15.4974	18.6183	15.1242	16.1169	15.2045	14.7127	16.358	15.2963	13.965	15.8785	14.5133	13.1093	17.0078	14.8491
ABCA1	ENSG00000165029.14	mRNA	17.3745	17.6637	17.1027	18.3707	18.9413	17.9755	17.825	18.3901	16.2714	16.4322	17.636	18.8018	19.5827	17.9685	18.4238	17.9313	18.7998	17.5081	16.0682	17.489	15	17.8008	17.7265	16.634	16.6316	17.0163	17.8955	19.1104	18.2388	18.5368	16.6035	18.546	17.4763	17.533	18.6936	18.9618	17.8126	17.6161	17.6647	18.6273	18.2208	18.2747	16.5471	16.6347	18.2018	16.8911	16.139
ABCA12	ENSG00000144452.13	mRNA	9.23125	10.6465	11.1269	10.844	10.1208	11.505	12.4407	11.1925	9.37618	10.2527	11.4925	11.6928	9.2871	10.3758	10.9093	11.111	10.4222	9.80708	10.2486	12.2169	10.1415	9.12162	12.1732	9.8842	10.114	11.0903	10.3792	11.2515	11.4608	10.8313	9.99306	13.1553	12.8847	12.4449	11.8579	11.3291	11.4061	11.616	13.5144	10.5616	11.1579	10.9312	11.1646	10.194	11.7631	11.5783	11.5189
ABCA5	ENSG00000154265.14	mRNA	14.0615	12.2298	15.2131	13.6707	15.0514	14.4433	12.3857	13.8202	14.9918	13.9968	14.1741	13.8128	14.4521	13.4983	12.4849	15.4615	13.9656	11.7756	14.3834	13.2132	13.4389	12.6061	16.0971	13.4875	14.8212	14.2748	13.6325	15.0081	14.593	16.298	14.4558	15.016	14.6748	13.4196	15.3423	14.4289	16.3084	13.0441	12.7613	14.1879	15.5311	15.5884	11.3174	14.7869	14.6471	14.8066	10.9418
ABCA8	ENSG00000141338.12	mRNA	14.0372	12.6803	13.1615	14.1362	15.0267	16.3542	16.0924	15.0768	16.1785	15.0776	16.0502	14.3522	15.9614	15.2802	14.6935	16.0517	15.7969	14.5732	15.3851	16.342	12.4082	15.5262	17.84	15.6317	16.7734	13.2891	13.4347	17.1308	15.2611	17.7091	14.0879	15.486	15.804	15.3424	16.5426	15.9741	16.7631	14.8805	14.9768	16.6983	16.7848	15.5216	13.1398	15.2362	14.6439	15.1367	14.0895
ABCB4	ENSG00000005471.14	mRNA	13.5746	14.413	14.2231	13.1531	15.2085	13.2746	13.7312	15.5639	13.2977	13.2374	13.7438	13.3953	13.9967	13.5042	14.1805	13.6098	12.9917	14.5272	12.2552	14.8563	14.0844	13.1855	12.9046	12.6528	14.1203	13.0041	12.6588	14.0739	11.4117	13.2044	13.1393	12.9243	15.2535	13.9602	12.6277	13.7988	12.4457	13.7493	15.4121	14.5757	14.1542	12.4825	12.7086	13.3886	11.9146	12.8549	13.6454
ABCC2	ENSG00000023839.9	mRNA	12.7744	9.84047	12.7523	11.184	11.192	10.8783	9.91766	14.8577	10.0777	11.5333	10.3823	11.6362	10.7741	10.9184	10.9198	11.2369	11.2207	12.661	10.4606	9.64393	13.162	12.7147	10.4855	10.6716	11.0499	9.73252	9.76876	10.1846	11.0189	10.1641	11.3841	9.73239	9.98951	10.6873	10.8688	11.0383	13.0443	10.6052	11.4877	12.1802	11.4207	10.7491	9.41357	10.5262	11.4595	10.7996	10.4595
ABCC6	ENSG00000091262.13	mRNA	12.372	12.6958	11.2111	12.9843	13.5995	14.3892	13.5223	11.2578	13.1199	11.8526	13.0741	12.2506	13.1521	11.692	12.1327	11.9396	13.3803	12.745	11.1817	13.1523	11.2126	11.6588	11.4643	12.065	11.6107	11.845	12.0923	12.6055	12.5144	12.607	11.2707	13.4821	13.136	13.6016	12.5897	12.3149	11.7229	11.8891	11.3876	12.4787	12.2697	13.5205	10.4295	11.7325	11.9256	11.6966	12.1252
ABCG1	ENSG00000160179.17	mRNA	16.69	17.3012	16.6298	17.4461	17.9169	17.0834	17.7509	16.2973	15.5617	15.318	16.7849	17.1762	16.1212	15.6563	16.4616	16.148	17.3002	17.2212	16.809	17.3053	16.4963	15.6946	17.053	17.4862	15.8852	17.5241	16.3884	17.3291	15.9811	15.9596	14.6272	15.8275	16.1186	16.0945	16.6902	17.1746	16.6435	16.1609	16.196	17.3452	15.5951	17.5834	14.4618	15.9724	16.534	15.8562	15.7882
ABR	ENSG00000159842.13	mRNA	17.7029	18.6092	18.2857	17.9977	18.2581	18.8711	17.8719	18.5753	18.4388	18.0009	19.1674	18.5389	18.6874	18.1311	18.4064	17.967	18.7959	18.2415	19.0461	18.3578	18.2242	18.4169	18.1401	17.8216	17.7862	17.6649	18.5807	19.4715	17.2961	17.7703	17.9934	18.2215	18.3839	18.9255	18.8155	17.6286	19.2673	18.8855	18.8987	18.4288	16.7277	18.8755	18.6658	17.7702	18.201	18.9834	18.6077
ABTB1	ENSG00000114626.16	mRNA	16.5936	16.1463	15.6232	16.8344	17.2775	16.7917	16.9172	15.9941	17.0052	16.7753	16.8347	15.8019	16.6275	16.4882	16.1815	16.8095	16.3033	16.3646	17.1352	16.8762	15.8609	15.1823	16.1751	16.7575	16.5124	17.0309	15.9808	16.7315	16.5039	16.01	16.7411	16.18	15.2411	16.4518	16.5042	16.2208	15.8602	16.7264	14.3777	16.728	15.8293	15.7504	15.9572	15.9505	15.9676	16.4578	16.2126
ACAA2	ENSG00000167315.16	mRNA	18.0687	17.0498	18.6519	18.5703	18.9834	18.0097	18.483	18.517	18.2394	17.5813	18.4346	17.7186	18.0778	17.0663	17.9901	16.6296	18.7868	17.1975	18.1351	18.1309	19.2895	16.3093	18.6027	18.2915	16.0083	17.8102	18.0135	17.5977	17.6748	18.2499	17.4144	17.944	19.4147	18.5537	17.8069	18.3252	17.0186	18.3436	16.9126	17.4381	17.5835	18.2752	16.33	17.6865	18.8049	16.3773	18.1017
ACOT11	ENSG00000162390.16	mRNA	13.8146	11.6316	10.7675	13.2883	15.6239	15.0955	14.7323	14.4838	14.2825	12.1183	14.2987	11.7853	14.3011	12.7143	13.4103	13.0306	15.0051	12.6341	13.2244	14.3609	11.6113	13.2092	13.9922	11.9296	14.0047	13.5004	12.1735	14.1449	13.7441	14.1813	12.7354	14.3429	16.3841	13.7012	14.0777	14.181	13.0963	12.9965	13.7759	13.2804	15.141	13.4891	12.8507	13.3494	14.3292	13.704	14.3922
ACOT13	ENSG00000112304.9	mRNA	17.2869	16.8621	16.5706	17.396	17.0706	17.2146	17.0609	16.9132	17.0632	16.7133	17.4711	16.6287	17.0927	16.765	16.8959	16.2446	17.4203	16.6186	17.5196	17.5166	17.378	17.4084	17.9479	16.817	17.2842	17.886	17.6483	16.7926	18.1746	17.6489	16.9829	17.1878	17.0763	17.016	17.1647	17.2902	16.5549	17.4442	17.1739	17.2789	17.3318	17.9093	16.679	16.929	16.9136	16.718	17.2655
ACOT4	ENSG00000177465.4	mRNA	13.6226	13.7533	13.1215	14.1047	14.1761	15.0846	13.724	13.4012	13.6688	14.1494	14.7029	12.9287	13.882	13.8105	13.4686	13.6726	13.9719	13.3857	15.7151	13.4154	14.9298	10.5301	12.1683	13.9285	11.009	13.6852	13.7144	12.9982	15.0526	13.4502	13.1313	15.3442	13.7802	12.3315	14.1043	15.0003	12.6045	13.567	11.8093	13.4304	12.4575	12.8433	12.1594	16.0583	13.3773	14.2639	12.3945
ACSS1	ENSG00000154930.13	mRNA	14.5993	16.9837	16.058	15.7195	17.8727	17.4311	17.0039	16.1332	17.8743	17.1951	17.8451	16.6177	16.4172	17.7184	16.6135	17.0367	16.5368	17.3478	16.961	16.0192	16.493	16.9281	17.9077	17.6798	17.9572	17.0799	16.0767	15.3994	16.6033	14.9423	17.3547	14.6085	19.1276	18.0877	17.2951	15.5205	17.8069	16.9295	15.8745	16.5919	18.4783	17.4427	16.662	17.656	14.9719	16.4475	18.008
ACSS3	ENSG00000111058.6	mRNA	15.3941	11.8336	16.3776	14.835	16.6059	15.2642	16.5624	16.403	16.3641	15.6159	15.9814	15.7122	16.1885	18.5444	17.4878	16.8883	15.898	12.3299	14.6536	16.4169	13.7123	13.8381	16.5233	13.5966	15.9638	16.55	16.6961	17.7479	16.5145	16.1494	17.1174	16.2588	15.089	17.0538	17.1314	15.8005	15.2572	15.552	12.0413	15.1423	16.8619	14.9953	15.8881	16.6694	16.1863	17.6007	16.2085
ACTC1	ENSG00000159251.6	mRNA	15.6856	10.5459	13.0026	16.5559	12.6399	14.178	11.7713	11.4278	12.2498	13.2413	14.2527	13.0093	12.6689	12.4218	12.3452	11.3315	10.9838	14.9408	14.2867	13.1633	13.4654	15.6743	12.709	14.1411	9.81372	11.0643	12.0475	10.9319	13.1271	11.2674	11.225	13.5566	13.169	12.1651	11.9463	12.8287	11.0836	12.9459	10.3667	13.7837	11.4136	13.6275	11.6263	11.2147	12.7417	14.0473	10.8852
ACTL8	ENSG00000117148.7	mRNA	9.10875	12.0211	11.079	7.97619	7.93856	0	0	7.89078	9.01307	8.07006	7.88069	0	9.40125	0	0	9.27949	10.2996	0	10.0006	7.92992	10.0632	10.8715	0	9.9984	0	0	9.39507	0	9.51354	8.58597	8.08575	0	0	0	0	7.74129	0	7.89221	14.5042	8.99331	0	9.0999	0	0	10.5767	0	0
ACTRT3	ENSG00000184378.2	mRNA	12.0013	12.9157	10.804	12.4505	14.6979	11.5141	11.3118	15.3264	10.2282	11.5449	14.3841	11.7868	12.2942	11.2589	12.0149	10.7578	12.6085	11.2491	12.8577	12.2114	14.9865	10.7664	13.826	10.8926	11.2453	11.5373	13.8526	11.9353	11.2143	13.725	11.2977	14.1742	14.3247	11.89	10.2829	12.839	11.2937	11.2409	11.4609	11.2078	13.0564	11.3146	10.1743	12.5945	11.0562	13.7245	10.9433
ADA	ENSG00000196839.11	mRNA	16.5747	16.7685	15.7907	17.3737	17.074	16.1346	17.2092	17.4879	16.5541	16.9747	16.275	15.421	17.146	17.5443	16.2875	16.2156	14.8944	15.5799	15.9766	15.8535	15.8	15.765	15.8701	16.0128	16.8329	17.1669	15.8347	15.4335	17.8064	16.0021	16.3124	15.5954	15.3253	16.4409	16.1996	15.9633	14.7283	15.3547	15.0109	15.3993	16.2687	15.8544	14.9685	16.1952	14.5066	15.2051	15.8342
ADAM23	ENSG00000114948.11	mRNA	15.5239	16.6287	16.414	16.3282	16.6311	17.1168	14.2061	16.3267	16.8634	17.1021	17.2475	17.2261	17.6348	17.037	18.0461	16.5961	16.7235	17.8233	17.6015	17.457	17.8823	16.9287	17.6479	16.8897	15.8875	16.1014	18.1272	18.0631	16.5852	18.2892	16.9534	17.2999	15.8817	17.8321	17.1404	17.51	16.9627	17.6687	17.014	17.4355	16.632	16.8799	17.1226	16.8667	16.0154	17.69	17.5023
ADAMTS12	ENSG00000151388.9	mRNA	15.7918	13.4956	11.2727	17.4217	14.6396	13.3708	12.8607	16.9627	13.7278	13.8029	12.7598	13.0116	15.1796	13.0366	11.7931	12.0696	14.0807	14.2209	12.8862	14.0875	12.2358	15.2676	13.5352	11.109	10.1527	11.8887	12.9169	14.0201	12.991	11.8353	11.0823	14.7658	14.8361	12.8518	11.3183	13.615	13.8304	12.2897	13.0408	14.8848	11.3014	14.5232	12.5408	13.9923	12.2865	10.9184	12.6569
ADAMTS5	ENSG00000154736.5	mRNA	14.4478	13.5204	13.7155	12.8601	13.535	13.0015	14.547	14.3254	12.9297	13.5392	13.4584	14.6672	14.4792	13.3719	14.7063	14.5967	12.3281	14.5738	12.4951	14.4733	13.241	13.0167	13.8772	13.6155	9.43411	9.65287	14.3477	14.5228	13.2647	13.8943	13.828	15.1457	11.2309	14.8742	13.5216	12.7022	14.9968	11.7959	15.0643	14.1364	14.0628	13.8393	14.1711	12.6185	11.84	13.1984	12.0896
ADARB1	ENSG00000197381.14	mRNA	16.1546	14.9806	14.969	16.1386	14.9126	15.0925	14.5346	14.581	14.6778	14.8755	14.8651	14.7883	15.1049	14.569	14.6274	15.0856	14.7333	14.634	15.1604	14.9966	15.8924	13.1461	13.9317	14.2722	13.4028	12.6764	14.4107	15.7833	14.1088	13.7644	15.165	16.0455	15.545	15.3083	14.7861	14.4565	14.7805	14.5108	14.366	15.7674	15.0528	14.3123	13.9721	15.3186	14.54	15.5211	14.2275
ADARB2	ENSG00000185736.14	mRNA	11.196	11.7533	14.7856	10.7235	12.9129	14.2662	13.6854	8.39329	9.68626	12.3637	13.8094	13.6937	12.33	11.6567	12.3348	13.9005	11.3058	13.1061	15.2796	12.1565	13.9355	9.69874	13.0647	14.7806	9.37097	11.2249	10.7054	10.1672	12.2829	10.5469	10.7149	10.5078	13.2782	12.5868	16.1216	11.3891	14.0849	11.391	11.3434	12.1675	10.6666	9.92498	9.65883	10.3568	8.6686	13.2727	10.2902
ADCY7	ENSG00000121281.11	mRNA	14.5319	13.6441	13.1652	15.7439	14.0256	14.4377	14.9482	15.46	12.9893	13.0633	15.0836	14.3995	14.7222	13.8781	15.0343	14.2919	15.3196	15.4349	14.3672	15.1827	13.9734	13.5179	15.1638	13.4866	14.5843	13.5467	13.6305	15.232	12.4907	12.7465	12.9782	13.4041	15.0921	14.0545	13.5218	14.4154	13.9628	13.5018	13.7064	14.1195	11.5536	13.7319	13.5104	12.9626	14.2956	14.1404	14.4418
ADD3	ENSG00000148700.12	mRNA	17.7687	17.6557	18.8248	17.9578	19.0935	18.5288	18.5824	17.7305	19.3034	17.9527	19.9324	18.3325	17.9536	18.0798	19.1389	18.4618	19.9293	19.0814	19.3908	17.9728	17.7944	19.3485	19.2696	18.397	17.7244	18.8781	18.4969	17.8617	19.6273	19.7616	17.6675	17.8055	18.5135	18.5315	18.8913	18.104	19.7797	18.2415	17.6361	18.5837	17.6609	18.7624	17.867	18.712	18.588	18.5157	18.6648
ADHFE1	ENSG00000147576.14	mRNA	14.0635	14.5588	17.0292	14.8075	16.8769	15.5953	16.743	13.1052	17.4489	16.4094	16.3975	16.0233	14.8664	15.3834	15.726	16.6011	16.5892	16.6306	15.6346	14.3334	15.023	16.2373	15.4653	15.9696	15.6056	14.6535	14.377	13.8704	16.9252	14.8122	16.4686	14.3705	15.168	15.9171	16.5617	15.7868	17.0753	17.0907	16.2598	16.0346	16.9118	15.0718	14.6391	15.6469	15.1573	15.228	14.9247
ADM	ENSG00000148926.8	mRNA	20.3316	18.1205	19.2983	16.1058	19.0929	18.2874	18.0331	19.7099	17.3241	17.0999	17.2948	20.2752	19.3304	16.4421	18.1112	17.1856	18.3788	17.849	16.9911	18.5397	18.5766	17.5746	15.1181	19.7767	16.5298	17.3289	20.8457	20.5806	18.7987	18.0479	19.4681	20.3625	18.5212	20.9095	19.8362	20.8962	16.803	20.6655	14.9834	18.3984	17.7204	18.2051	18.3995	18.6852	19.9056	19.1446	16.2556
ADRM1	ENSG00000130706.11	mRNA	20.4401	19.7064	19.6722	20.005	19.4434	20.0107	19.9024	20.6506	20.0457	19.9736	19.8508	19.0908	19.8689	19.7796	19.1558	19.5367	19.5918	19.4652	20.042	20.2223	20.0663	19.0365	19.9353	20.1791	20.0091	21.0001	19.9835	19.4672	19.6301	19.322	20.4686	20.03	20.0374	19.5249	19.7619	19.4765	19.3677	20.2658	20.2736	19.2923	20.1038	20.349	20.4101	19.9967	20.4572	19.6129	19.9022
ADSSL1	ENSG00000185100.9	mRNA	15.3996	14.6729	14.2428	14.14	15.3566	15.5005	16.141	15.3774	15.0264	15.0663	15.26	15.7456	15.8516	15.5991	15.3166	14.3962	15.8403	14.4869	14.8532	15.0307	12.5462	12.8245	13.6559	16.2765	15.5442	14.0007	16.5732	16.1027	15.4424	15.1845	16.0875	15.3952	15.2117	15.5922	16.0864	15.8122	12.5745	16.1751	13.2441	15.8144	14.9096	13.7788	15.6469	16.0291	14.9705	15.2466	15.3706
AFAP1L1	ENSG00000157510.12	mRNA	14.3949	16.9129	17.2682	15.2987	16.012	16.2401	16.5441	15.602	17.9515	17.9413	16.307	17.9687	17.1851	17.9954	17.2015	18.8074	15.9081	16.5759	15.6964	17.572	18.1034	16.3693	15.9007	15.8915	17.4016	16.1087	17.159	17.5294	16.2557	15.0031	16.9877	15.3364	15.0254	17.7474	16.877	16.0574	16.4487	16.6342	15.6678	17.0007	17.9705	16.1489	17.2199	19.0314	14.5809	19.1306	19.0017
AGMAT	ENSG00000116771.5	mRNA	13.0751	13.1308	13.5935	15.3085	14.3919	14.8198	15.0254	15.2094	13.3418	13.9811	15.1235	12.7313	15.2236	14.6605	13.7604	13.5907	16.0382	14.5897	15.2138	15.093	12.5131	13.0324	11.3667	14.4315	13.1636	13.5081	14.5939	14.2913	14.4457	14.5511	12.979	13.3381	14.5727	12.3789	12.3787	14.896	14.1693	12.4171	12.081	12.7766	12.0708	13.9027	14.0113	13.3025	13.8342	13.9317	14.4317
AHRR	ENSG00000063438.15	mRNA	13.4733	12.1571	12.7243	12.1183	12.8331	12.1618	11.8458	12.6499	13.4357	13.8553	13.1722	12.4345	13.8053	12.4166	12.3187	13.9628	14.5751	12.5801	13.7436	12.6368	12.7923	12.6866	11.4933	12.3473	12.9762	12.7698	11.673	13.4574	12.0242	11.1255	12.8197	12.9742	13.2871	12.0738	12.8683	11.2777	16.187	14.2575	13.5383	12.5183	12.8563	13.1844	12.991	12.9358	13.5633	14.1439	11.2956
AKR1C1	ENSG00000187134.11	mRNA	13.1925	12.823	11.3922	10.9744	13.7434	13.6222	13.4873	11.9802	15.6406	12.6782	12.7594	12.3102	10.8557	10.8696	11.9079	10.9401	11.6981	12.3364	15.8239	13.037	14.6417	14.2844	11.9498	14.1618	11.3429	13.7821	12.1783	13.1505	13.8292	12.5666	10.4218	14.3382	12.0998	9.59999	13.8883	11.3233	12.6234	11.1015	11.0585	12.3608	9.1644	11.4077	10.0938	14.2812	7.75286	13.0165	11.1574
AKR1C3	ENSG00000196139.10	mRNA	15.3485	14.6234	13.8191	15.5943	17.5729	16.493	15.0431	14.1503	15.4993	15.2554	14.7045	14.2193	14.6951	13.8439	14.2293	13.7161	15.2058	15.4381	16.7203	15.5146	17.1949	17.144	13.9602	15.9044	13.4236	16.4286	14.4732	13.5426	16.5309	14.6241	13.533	16.2466	16.6461	13.2419	15.0904	14.4285	13.784	15.4582	14.0753	14.2637	13.527	15.4807	13.4812	15.0902	15.4733	14.231	14.0888
AKT3	ENSG00000117020.15	mRNA	17.1036	17.8682	20.9049	16.4647	16.4961	16.5647	15.9197	16.5765	16.3192	16.8281	16.9356	17.2045	16.9678	16.2183	17.0632	17.2095	17.0647	18.0225	16.9632	16.2787	17.0426	17.8826	17.1985	17.0663	16.33	16.523	16.3774	16.935	16.252	16.6501	17.213	16.9207	16.6197	16.3447	17.3358	16.7231	18.2714	16.9703	16.6007	17.5807	16.6746	16.7402	17.2504	16.7197	16.3662	17.6731	16.9056
AKTIP	ENSG00000166971.15	mRNA	16.8227	17.0227	17.7315	16.192	17.7621	17.1116	17.2781	16.8334	18.021	17.3464	17.8446	17.3821	17.5599	17.3805	17.5757	17.5784	17.509	17.2932	18.229	17.7854	17.5119	18.1282	17.8432	17.3097	17.2243	17.2987	17.4397	17.2044	18.233	18.3055	17.439	16.4974	16.8403	17.4312	18.3227	17.4062	17.5825	17.5074	17.2038	16.9652	17.8433	17.5031	17.2232	17.7118	17.2734	17.9096	16.7281
ALDH1L2	ENSG00000136010.12	mRNA	15.5616	15.4028	15.0976	16.5039	14.9074	13.7506	12.0339	15.6516	15.1908	15.6426	14.7288	15.8739	15.2033	13.8432	15.3389	15.4547	13.4949	15.5448	14.3574	13.3486	15.7234	15.258	14.3065	14.1702	12.4819	13.4113	14.0607	14.3194	13.8052	14.5316	14.0349	15.186	14.2535	14.1338	14.1353	14.8953	13.6267	15.8882	16.1044	15.6426	13.8458	14.2734	14.1542	14.6762	14.508	15.3399	16.1275
ALDH3A1	ENSG00000108602.16	mRNA	11.0351	11.0237	13.605	12.2913	12.1832	14.4217	12.4402	11.5139	13.2606	11.6938	13.0698	12.6136	12.4706	11.2252	12.9107	10.8692	15.8682	9.99388	12.2206	11.5532	11.4057	11.3846	15.0272	11.3409	11.2788	12.4451	12.6672	11.2685	13.6099	13.2111	12.1383	20.1511	15.908	14.4777	12.2541	10.9855	12.7762	15.5892	13.3685	13.8961	11.7276	14.311	11.4295	11.3969	15.337	10.2996	11.3303
ALDH3B1	ENSG00000006534.14	mRNA	16.9373	15.3778	14.5422	17.3106	17.1521	16.1467	16.7997	17.706	15.516	15.3409	16.7226	15.2184	16.506	15.412	15.5083	14.8932	15.6503	15.2445	15.2864	16.7489	13.9782	14.5489	16.2113	15.8087	15.0922	16.4863	16.327	17.2121	14.7904	15.3891	15.3645	17.2079	15.8378	15.033	16.7715	16.3967	14.0581	15.7911	15.1481	16.09	15.5339	16.2057	15.5864	14.7148	16.1959	14.3985	15.1436
ALDOC	ENSG00000109107.12	mRNA	19.3273	19.495	20.8178	17.0107	21.7855	21.4196	20.8559	18.9539	22.1398	19.0816	20.8875	20.9574	19.0974	18.7702	20.0976	20.1494	21.4931	21.3281	22.0105	21.6926	21.5738	23.373	22.3346	23.2027	21.3718	20.6733	19.636	19.3316	21.7239	20.1878	19.8768	18.7939	19.1041	21.545	22.0845	19.2663	20.5572	20.1755	21.2422	20.6046	23.2421	21.2824	19.5319	20.8221	20.5379	21.4443	19.9357
ALKBH3	ENSG00000166199.11	mRNA	17.5818	17.9988	17.6977	17.7927	17.6738	17.0699	16.9558	17.6085	17.3508	17.8769	17.1851	16.9724	17.3552	16.562	16.9833	16.8933	17.0697	16.3539	17.6739	17.5579	18.1557	16.6524	17.3531	17.2442	16.8096	18.2132	17.3414	16.9892	18.1793	17.9069	17.382	17.5223	17.1482	17.0734	17.2389	17.8676	16.6878	17.5042	16.9883	16.8474	17.6192	17.5309	17.513	17.3484	17.408	16.5382	17.5316
ALPP	ENSG00000163283.6	mRNA	7.40004	0	7.20356	0	7.22767	0	7.25186	0	0	7.35884	0	7.27934	7.10997	7.19924	0	8.9804	7.01007	0	0	7.21905	7.76887	0	6.99892	7.70431	0	0	0	7.63231	0	0	0	0	0	0	0	7.03095	6.99462	0	0	8.28047	0	8.38692	0	7.23946	0	8.07594	0
AMER1	ENSG00000184675.8	mRNA	13.9983	14.4546	13.8377	14.556	13.2047	13.662	13.3628	13.385	13.378	13.8966	13.0704	13.9602	12.9479	13.9962	13.8989	14.2611	14.046	14.6218	13.7601	12.6028	14.6856	14.3353	13.8084	14.244	14.3912	12.3805	13.5712	13.9086	12.887	13.2485	13.5947	13.7153	14.72	14.4507	13.4041	14.3431	15.1054	13.9016	14.7985	14.0207	13.9687	13.1755	13.3967	13.9989	13.9201	13.8586	13.721
AMT	ENSG00000145020.13	mRNA	15.005	14.1473	16.2395	16.6014	17.1022	16.1005	16.5163	15.1712	17.4616	17.1214	16.585	15.7022	16.2528	15.8587	16.0853	16.5124	17.0727	15.9543	15.428	16.4436	14.2945	14.5106	13.5095	15.1267	14.2404	13.7511	14.9222	15.0431	15.928	13.9496	16.9644	15.1609	16.4856	16.3434	17.0404	16.6736	15.3928	16.5348	14.0026	15.926	15.91	16.3279	14.7289	14.1772	16.6843	16.3129	13.3684
AMZ2	ENSG00000196704.10	mRNA	18.319	18.8021	18.696	18.5836	19.2711	18.622	18.4575	18.6697	19.3213	19.2848	19.4799	18.4549	18.7102	18.8491	18.7174	18.6797	19.5672	17.8792	19.1603	18.7957	19.6571	19.4514	20.3578	19.2328	18.6249	20.3263	18.8222	18.1359	20.0311	19.894	19.124	18.6493	18.3724	18.5961	19.1394	18.9955	18.8814	19.3254	18.6699	18.75	19.3506	19.5661	19.0186	18.9327	18.9239	18.4178	18.5676
ANAPC15	ENSG00000110200.7	mRNA	16.8477	16.8631	15.9901	15.9995	16.6786	16.0046	16.2821	16.7594	16.8282	17.129	15.7962	16.2351	16.3748	16.4989	15.8735	16.2026	16.0759	16.12	17.3125	16.9151	16.7785	16.3501	16.5407	16.74	15.885	18.3278	16.6687	15.2262	17.3862	16.5267	16.7732	16.2159	15.7186	16.1338	16.5259	16.8196	16.3748	16.7123	16.3514	15.5162	16.982	16.96	17.0934	16.8172	16.1593	16.2956	16.6496
ANGPT1	ENSG00000154188.8	mRNA	16.6858	12.6324	16.7299	16.3618	16.3397	14.6838	15.5804	17.6123	13.7263	15.3415	16.9563	13.5416	15.2476	14.7828	15.41	14.9094	16.1899	11.632	14.0369	15.2416	14.2001	12.1839	16.4676	14.4938	11.193	13.9122	15.5453	15.7775	17.366	17.145	14.4673	14.6524	11.7016	15.481	16.15	15.4105	14.4737	15.0829	15.6059	14.2795	11.9954	14.7472	11.9285	15.637	14.9836	13.1901	12.265
ANGPTL5	ENSG00000187151.6	mRNA	11.6682	9.01532	7.57074	10.9478	12.7575	9.69035	0	10.9996	8.66856	8.72283	11.5298	0	10.2774	10.5597	7.32407	9.67064	8.37259	0	11.5024	11.1643	10.7175	0	10.5279	9.06945	0	9.12943	8.46678	0	13.2108	10.8227	7.74191	13.3492	9.38628	8.91555	10.4577	11.5597	9.93908	8.54472	11.4432	9.23258	9.06398	12.0003	0	12.8089	9.23292	9.76356	7.54038
ANKH	ENSG00000154122.11	mRNA	18.7269	16.8581	16.6678	17.7173	17.7975	17.8205	17.8198	18.5817	16.3627	16.3717	17.3675	16.9418	17.7891	15.9183	16.6289	16.7335	16.2424	17.3893	17.8569	18.1869	17.1565	17.3569	17.3043	17.2574	14.9937	17.4666	17.3539	17.848	16.7283	17.6361	16.7209	19.0598	17.7898	17.1468	18.0733	18.1232	17.0201	15.9922	16.8473	17.5479	16.3084	17.3513	17.6532	17.5653	17.6266	17.6894	16.2647
ANKRD2	ENSG00000165887.10	mRNA	11.7898	8.13932	12.4399	13.0324	11.9948	13.8548	12.1261	10.8318	13.4162	11.8858	12.4841	10.3471	12.4977	11.7253	11.6071	11.0542	12.397	10.8414	14.9456	10.8711	10.4243	10.2333	9.0663	11.9437	11.7117	9.83505	11.7547	0	13.043	10.5295	11.6122	11.4713	12.5504	10.3573	10.1646	11.4183	12.9174	11.0555	11.3425	12.1595	10.7687	10.0449	10.056	9.30818	11.812	11.6065	8.24399
ANKRD29	ENSG00000154065.15	mRNA	15.022	11.6681	11.5907	15.3247	15.4792	14.8109	14.2238	12.0143	13.2772	12.8871	14.0159	11.252	14.2987	12.4304	11.883	12.5147	12.276	12.4919	14.8245	13.1799	11.5071	9.67986	12.3172	11.6348	11.7196	15.287	13.3159	13.7119	14.5153	15.5393	12.3691	16.2039	13.2738	12.1244	13.9551	14.4164	11.8979	11.4309	10.2042	12.7049	13.357	12.9345	11.1642	13.0126	13.828	14.1776	13.5182
ANKRD44	ENSG00000065413.15	mRNA	15.2418	14.85	14.6508	16.0544	15.5999	14.7719	15.2436	14.2306	15.8832	15.1655	15.385	15.3669	14.7288	14.9414	15.5854	15.5162	15.6415	16.0348	15.491	15.6631	15.6418	15.4872	16.2914	15.3718	15.4591	14.9113	13.8348	14.7999	14.8659	15.6763	14.4178	14.4861	14.724	14.4928	15.1192	15.255	15.4983	14.8292	15.611	15.4559	15.1553	15.366	14.6697	14.7272	14.4059	16.1771	15.4059
ANO2	ENSG00000047617.13	mRNA	11.1675	11.6991	12.9302	11.0825	12.069	14.5727	11.7344	10.3091	12.6902	12.7777	11.8288	11.9109	12.5272	12.112	12.4218	12.9902	12.1371	11.733	12.1009	12.2651	11.3158	11.4466	11.5107	10.1261	11.3815	10.8138	10.0627	11.5935	11.225	11.7429	11.8261	11.1411	11.7111	11.5706	12.6405	11.033	10.2005	11.8948	11.4044	12.2442	12.9081	10.2587	10.4713	13.2425	9.83076	12.2868	12.0858
ANO4	ENSG00000151572.15	mRNA	15.8358	12.3277	12.214	15.0316	14.538	14.3117	13.7536	15.824	12.1115	12.3702	14.8443	14.9328	13.6954	12.767	14.1446	11.0776	12.613	14.8292	15.5097	13.2157	11.0549	10.7709	14.9414	14.4324	9.7066	10.2206	12.9246	13.409	12.9717	11.6836	11.8676	13.2015	12.2843	11.0058	14.7972	12.4619	14.2411	12.0785	11.1435	12.8159	11.072	13.2293	11.4005	11.6516	13.0761	14.6755	11.8479
ANXA8	ENSG00000265190.5	mRNA	11.1557	0	6.51379	7.56759	6.5378	9.62522	8.55039	0	0	6.66845	0	6.58926	6.42061	0	7.84109	0	8.89102	6.4998	7.27612	6.52921	7.07714	0	6.31006	7.01276	7.14233	0	0	0	9.90994	0	6.68404	13.4153	7.90988	6.28106	0	6.34194	7.29664	8.06599	6.58522	0	0	0	6.30124	0	9.16781	8.70016	0
AOX1	ENSG00000138356.12	mRNA	16.1816	11.0052	15.1207	13.6044	13.3344	14.7437	12.6484	14.0905	14.1352	12.639	11.7588	16.1095	13.816	12.1101	14.2496	14.0592	14.3763	12.4063	12.9347	15.354	14.0306	11.8805	12.895	13.3284	10.29	12.2543	13.1983	15.5123	12.6086	12.7347	11.0904	16.2183	12.8404	11.3072	13.9268	15.3829	13.3985	14.344	12.1057	16.219	11.2238	15.7139	11.9509	15.0797	10.9395	17.1507	10.2103
APBB2	ENSG00000163697.15	mRNA	16.8168	17.525	16.7135	16.3619	16.3775	16.6504	17.0093	16.2392	16.8375	17.1216	16.6397	17.3107	16.7893	17.8807	17.49	18.152	16.5334	17.9314	16.834	16.4117	17.6987	17.3369	16.6082	17.0599	17.6512	17.2984	16.5697	16.5475	16.6123	15.0425	17.0931	16.1196	16.6572	17.5357	17.3722	16.3746	16.9975	17.2384	17.2995	17.0428	17.7971	16.7493	17.2427	17.5022	15.801	17.2508	16.9422
APC	ENSG00000134982.15	mRNA	15.8424	16.5822	17.7158	15.9	17.5312	17.5539	16.49	16.104	17.7292	16.8448	18.5152	17.811	17.0672	17.8894	18.288	18.1654	17.8269	17.5569	17.8379	16.8746	18.5082	18.0799	18.2827	17.3455	17.4466	16.5618	17.3392	17.7149	17.1367	17.6583	17.4164	16.7954	16.6024	17.4709	17.6262	16.8054	18.5692	17.4345	16.7188	17.8918	18.1711	18.3027	17.1042	17.6289	17.2051	18.3327	17.3403
APOBEC3B	ENSG00000179750.14	mRNA	15.8163	14.2875	15.3433	17.4947	13.0782	15.9635	15.1223	17.6497	14.9858	13.2882	14.02	14.6467	14.7204	14.9985	14.6911	14.0253	16.1194	13.6247	13.3808	15.8063	15.887	13.6537	16.0614	16.4908	16.4547	15.7514	16.7318	12.9592	16.1164	15.7176	15.3868	14.2549	16.7896	15.901	13.9068	16.7948	15.1163	16.3694	14.2599	14.7862	12.6301	12.7168	15.7773	16.603	16.116	16.1995	16.0579
APOBEC3F	ENSG00000128394.15	mRNA	15.3521	12.9969	14.7753	16.5919	15.4516	15.0428	15.9723	15.6899	15.2993	13.7092	15.0009	13.1636	14.2349	15.054	14.3376	14.8126	15.9649	13.4709	13.5793	15.8329	15.5113	12.3945	15.3301	14.8231	15.663	14.6044	15.1542	15.2555	15.5269	15.8336	14.1647	15.0114	15.1059	14.5539	14.1328	16.2075	13.8064	14.7243	13.3115	14.6183	14.1473	14.9499	13.6894	14.5124	14.8362	14.5025	15.9405
AQP3	ENSG00000165272.13	mRNA	16.4936	14.6528	12.1152	14.2017	13.9817	15.4048	14.1511	15.128	12.3132	12.1684	13.3931	12.9772	15.507	14.1833	13.4183	12.6848	13.1496	14.1132	15.1133	13.6988	13.2179	12.2196	12.8583	13.6186	12.1393	13.8868	13.616	15.1881	13.9894	13.7382	13.8884	14.9904	13.0322	12.307	11.8513	16.2479	13.9534	12.3642	14.5386	14.3943	11.5629	12.9695	14.9902	14.021	15.6061	14.5347	14.3032
AREG	ENSG00000109321.9	mRNA	20.8861	11.6514	14.4437	11.608	17.0876	14.6039	13.4202	16.0568	13.6143	10.2436	11.3747	16.367	13.5155	8.08705	12.6456	10.1931	10.2143	11.6573	13.4698	17.7145	12.5617	0	16.8486	13.1134	12.6274	16.1967	12.2339	13.8394	14.2743	13.5149	12.6507	17.4993	10.7153	13.9799	12.6803	13.5562	10.4616	13.9465	0	17.3331	11.3921	12.0826	9.45802	13.1668	13.454	13.4549	12.8631
ARHGAP20	ENSG00000137727.11	mRNA	14.1084	14.1827	14.625	14.6871	14.3558	15.1438	15.2296	14.6679	14.2804	15.681	14.4558	15.8784	16.1709	15.065	14.7315	14.8558	14.9515	15.8485	14.7485	14.9291	13.6718	13.9587	14.9626	14.2325	13.8466	14.2656	14.2311	15.7316	15.281	15.1275	13.7899	15.4147	15.1765	15.2872	14.9443	16.0192	15.643	13.2737	15.2111	14.2508	14.72	14.2018	14.7812	16.0667	14.6186	16.3081	14.7889
ARHGAP28	ENSG00000088756.11	mRNA	13.1379	12.4811	9.04279	14.4292	12.1998	11.6066	9.09132	12.7406	8.92252	9.56082	9.9552	10.8947	10.1397	10.7211	9.30881	9.87602	13.5096	12.4667	12.6384	10.5712	12.5157	9.19754	11.9217	14.2871	7.87303	9.25821	9.38235	9.47337	10.8367	10.1557	8.21694	12.6266	15.2522	10.9752	9.71293	9.6456	12.6298	8.53624	11.4347	12.5818	10.8191	12.3876	9.47907	11.6787	8.77785	8.57277	9.45216
ARHGAP35	ENSG00000160007.16	mRNA	16.677	18.3119	18.3055	17.2694	16.9059	17.9409	17.3845	17.4276	17.7944	18.7842	17.2396	17.7177	17.5421	17.6001	17.8662	18.3518	17.7936	18.6179	17.7172	17.1728	17.9288	17.1453	16.6883	17.7392	17.8427	16.6672	17.5034	18.4471	15.9453	15.8583	18.0285	17.4666	17.8461	18.0097	17.5689	16.9124	18.2954	17.7986	18.6838	17.9205	17.707	17.0523	18.1999	17.6754	17.663	18.2824	18.0772
ARHGAP6	ENSG00000047648.20	mRNA	14.8488	13.9868	13.6607	16.2928	14.5244	14.461	15.5021	15.6912	15.586	15.0501	15.0106	14.9755	15.8223	15.0618	14.1533	15.4987	14.6935	14.8248	14.591	15.822	12.8227	13.4906	15.0139	13.7493	15.0049	15.4683	13.9465	15.4513	13.7256	14.8325	12.3398	14.9629	16.5586	14.254	13.8913	16.1387	13.4182	12.839	14.3553	15.1719	14.8137	14.9939	15.4922	14.9327	14.5932	15.0796	15.1526
ARHGEF16	ENSG00000130762.13	mRNA	11.4834	13.6953	12.931	11.0941	11.9994	11.0421	11.4245	13.8072	11.2914	11.773	11.507	11.1083	11.1915	9.65031	11.4409	10.9734	11.3845	11.5267	11.7726	10.1551	12.0291	0	9.5861	11.7419	10.551	11.2876	11.138	10.8505	9.52103	10.4652	11.6327	11.2488	14.8628	11.5553	11.4729	11.0157	9.92929	11.0098	12.5119	14.4952	10.4151	11.1054	11.2457	10.8273	11.1689	11.2528	9.47237
ARHGEF35	ENSG00000213214.4	mRNA	12.1827	9.71333	9.84874	9.58917	12.3047	0	9.16136	14.3964	9.95052	9.68329	9.07904	9.18897	10.2396	0	8.2818	9.31133	0	0	9.29641	11.1264	10.4167	9.48964	0	9.61569	8.16446	9.09162	0	0	0	8.20397	0	14.8138	7.35508	9.29202	9.4209	9.67508	7.3238	9.50496	11.9198	0	0	9.30137	7.31923	10.5624	9.1951	8.98989	8.49872
ARHGEF40	ENSG00000165801.8	mRNA	17.6574	17.4413	18.3616	18.2727	17.8291	18.8145	18.1992	17.997	18.3192	19.1487	18.8947	18.2163	18.7976	18.4189	19.0478	18.9765	18.998	18.2546	17.357	18.3346	17.8259	17.4719	18.1849	17.7408	19.1483	17.727	18.0558	17.6551	17.8026	16.85	19.1462	17.5836	17.9107	19.0181	18.4952	17.8394	18.5598	18.6979	17.4733	18.4359	18.5943	18.1839	19.1017	18.3421	17.7324	17.8603	19.3143
ARHGEF5	ENSG00000050327.13	mRNA	14.8734	9.93954	9.8528	11.9434	14.7085	11.7141	10.9595	14.1495	10.0699	10.0089	11.1873	10.2506	11.1727	10.6551	9.19058	9.95842	10.3204	10.3407	11.0358	11.1894	10.643	8.23346	9.06283	10.7707	8.90346	10.416	9.33799	11.6522	10.0407	8.52897	10.14	15.2562	9.78934	10.5553	10.861	11.8207	10.4491	10.7684	10.0403	11.775	8.76774	10.9153	10.1399	10.6253	11.3035	10.6676	9.69692
ARHGEF6	ENSG00000129675.14	mRNA	17.6642	18.1054	18.6525	18.9047	18.7169	18.7091	19.1351	18.7086	18.6284	18.499	19.4988	18.5071	19.0132	19.2391	20.0664	19.7725	19.3916	19.5771	18.0536	19.3025	19.2985	19.7046	20.0522	18.1409	19.6243	18.478	19.3137	18.8579	18.8344	18.7048	18.5431	18.0131	19.0667	19.7254	18.7332	19.1828	19.2909	18.9721	19.5299	18.7075	18.5385	18.673	18.3976	18.6363	19.9376	19.0277	19.4687
ARL14EPL	ENSG00000268223.2	mRNA	12.4698	0	9.10455	10.1652	11.827	11.228	0	11.886	10.205	8.26291	11.0688	10.5011	10.0091	0	10.4398	0	10.7152	0	0	9.12011	0	10.0657	11.7036	8.60926	0	0	9.0043	10.8559	10.706	13.8202	0	8.49958	9.50986	0	11.318	12.3878	9.47843	9.08231	9.17662	10.5069	0	12.9348	8.88989	0	9.77097	9.56564	0
ARL4D	ENSG00000175906.4	mRNA	17.7037	17.7339	18.3789	17.4184	17.5831	17.2878	17.6644	16.2592	15.4583	16.4788	15.8523	17.4657	17.664	15.9716	16.6643	15.9732	16.9972	16.5755	18.0109	17.8767	18.489	15.9132	19.0449	19.1144	17.3887	17.5272	16.344	16.6207	17.8218	16.8632	16.9266	18.82	16.5277	17.3254	16.6188	17.4279	16.7717	17.4794	17.0135	16.7585	18.2761	18.0717	17.95	17.8265	16.8763	17.1344	17.3728
ARL5C	ENSG00000141748.11	mRNA	0	7.90412	8.62228	7.1062	9.38201	10.1604	10.4053	0	8.72391	9.1924	10.7011	8.11514	8.52827	0	6.79857	6.83019	0	8.02505	9.61171	9.05196	0	8.99885	6.84015	0	0	0	7.9391	7.47307	7.64405	9.29472	8.21055	0	8.44375	6.81102	9.51413	7.86598	7.82952	0	8.11108	9.70243	7.53957	8.81069	0	7.08049	8.12126	7.91647	8.00874
ARMC4	ENSG00000169126.14	mRNA	12.0719	8.00692	12.6607	11.5213	12.5764	13.0699	10.0613	7.53599	13.029	11.918	13.6162	8.95303	12.6477	8.13764	10.0057	10.2438	10.3581	8.12789	10.9653	10.0283	9.123	10.5153	13.1141	9.64231	0	11.8165	11.9113	10.7914	12.0134	13.6352	9.31117	13.2125	15.3869	12.9604	12.2531	8.96589	13.9038	7.53741	7.6314	10.4424	12.6049	13.9982	6.35456	8.91297	13.3624	6.44539	11.9812
ARNTL2	ENSG00000029153.13	mRNA	16.8246	15.2117	16.1438	16.7835	15.1617	16.1	15.6918	16.4701	14.6595	15.596	15.1491	14.9589	15.9449	15.9557	15.845	15.3318	15.6676	14.3552	15.6937	15.0981	16.3463	14.0098	14.908	14.4195	16.023	16.4153	16.2052	15.6869	16.1626	17.3884	16.0423	16.7986	18.0748	14.9769	16.0335	15.999	15.8051	15.1355	14.9269	15.3115	14.2154	16.2321	15.509	15.7823	16.2973	15.1927	14.9498
ARVCF	ENSG00000099889.12	mRNA	15.2107	16.9773	17.4362	14.0716	16.0407	16.7129	15.4965	15.1409	18.0168	18.4531	16.6905	17.3674	16.1554	16.6703	17.2023	16.8538	17.7098	18.0779	16.5626	15.7066	17.6568	17.127	17.3015	17.0735	17.3382	16.0646	17.05	15.633	15.9135	16.0315	17.415	15.0977	16.9346	17.6417	16.3567	16.0309	17.2898	16.6935	17.065	16.7155	16.4508	17.8503	17.5124	16.3731	16.7427	17.43	16.8246
ASAP3	ENSG00000088280.17	mRNA	17.7216	17.5677	17.7375	17.4988	17.4006	17.9084	18.3844	17.4625	18.0337	17.9467	18.3082	17.4125	17.5033	17.7595	18.4001	17.9205	19.2258	18.3453	16.5746	17.4198	17.6047	18.1143	17.9283	17.1929	18.054	18.0668	18.1411	18.7442	17.9077	18.6921	18.7173	18.0158	18.7741	17.5882	18.4674	17.6835	16.9731	19.2386	18.7627	18.5665	17.2926	18.2683	17.3367	17.7854	18.3849	17.8112	17.4394
ASCL3	ENSG00000176009.3	mRNA	9.66603	0	10.4675	9.53052	0	0	0	9.44489	9.5703	0	0	9.54474	9.37445	0	10.2196	0	0	9.45444	9.23778	0	10.0364	0	9.26272	0	10.102	0	9.36827	0	0	0	0	9.86174	0	0	0	0	0	9.44631	0	0	0	9.65718	0	0	9.55087	9.34558	0
ASL	ENSG00000126522.15	mRNA	18.4561	16.1452	15.6108	17.761	17.9505	18.2536	17.9837	18.2262	17.7177	17.022	17.2795	16.4528	17.9048	17.1309	16.9927	16.678	17.6767	16.8634	17.3705	17.9164	16.7412	15.648	16.6562	17.2308	17.4604	17.5402	17.3457	16.655	17.7342	18.369	17.5366	16.8193	16.896	17.7044	16.6466	17.5088	16.2581	17.4284	16.7673	16.6827	16.4715	16.9727	17.2048	16.4525	18.2021	16.5334	17.8181
ASMTL	ENSG00000169093.13	mRNA	18.3413	17.9382	18.5013	18.014	17.8254	17.9136	18.18	18.3704	17.9262	18.6551	17.9093	17.0055	17.9594	18.3628	17.6625	18.0024	18.4736	17.1326	18.2958	18.1887	18.1258	17.0255	17.8304	18.3072	18.2569	18.6119	18.3919	18.25	17.6349	17.5656	18.4187	17.6679	18.9314	18.6303	18.4239	17.9659	18.3998	18.6573	18.3436	18.324	17.4406	17.9876	18.4636	18.4103	18.5244	18.2752	18.3146
ASS1	ENSG00000130707.16	mRNA	19.2055	17.5012	18.3591	20.4967	16.422	17.3679	17.3261	17.9655	18.0614	16.2247	17.5217	16.4641	17.251	16.1795	16.1447	15.3172	15.7713	15.2392	18.8155	16.8878	15.9112	14.7454	15.3362	17.8766	15.332	17.4622	18.8135	17.6222	19.2342	21.2238	15.1183	18.6551	17.9934	15.5437	16.5874	19.6992	15.5725	17.0901	14.8171	17.5952	13.7186	14.9719	15.0544	17.6926	18.1956	16.4058	16.0744
ASZ1	ENSG00000154438.6	mRNA	7.39723	0	0	0	0	0	0	7.17721	0	0	0	0	7.10717	0	0	0	0	0	0	8.21138	7.76606	0	0	0	0	0	0	0	0	0	0	0	0	0	0	0	0	0	0	7.28229	7.69603	0	0	0	0	0	0
ATG4D	ENSG00000130734.8	mRNA	16.8802	18.2063	17.6204	16.5422	17.232	17.2202	17.4766	17.3536	17.9425	18.3965	16.9559	16.8827	17.1884	18.1968	16.8728	17.7582	16.3928	17.2896	17.3465	17.0483	18.0824	16.9823	17.2299	17.9697	17.9896	18.2023	17.6047	17.2524	17.5643	16.5169	17.7882	16.7842	17.1457	17.6123	17.6053	16.8923	16.591	17.0866	17.5996	17.142	17.5622	17.01	18.3048	17.8087	17.4713	17.7223	17.7281
ATOH8	ENSG00000168874.11	mRNA	15.8711	16.2418	14.7887	13.0603	16.2531	16.3348	17.5606	14.0129	14.8134	14.8914	15.1529	15.0809	13.81	14.7072	15.3241	13.6811	15.0532	16.0584	15.8567	15.8882	15.962	16.1319	16.4934	18.4952	14.7921	16.7772	15.9314	16.1308	14.8348	15.5535	15.0657	14.7872	14.9672	15.4297	16.4033	14.9576	15.4568	15.7513	16.8804	15.9949	12.535	15.1805	14.3106	15.1617	14.8214	14.2303	15.3655
ATP11B	ENSG00000058063.14	mRNA	16.6012	15.9379	15.9232	15.9785	16.0751	15.5192	15.3976	16.6642	16.3334	15.4677	16.0335	16.3223	15.9452	16.7894	15.988	16.5776	15.4095	15.8157	15.3803	15.3201	16.9712	16.3561	15.7616	15.1179	15.9	15.1179	15.6665	16.3613	15.9672	15.6655	15.7465	16.3939	15.8373	15.9363	15.6567	16.5444	16.351	15.732	15.3398	16.1194	15.7057	15.5529	15.6422	15.7687	15.9001	16.1533	16.1289
AVIL	ENSG00000135407.9	mRNA	14.5603	14.6447	18.1703	16.0489	15.4971	14.7666	14.3902	13.7566	16.9243	16.4454	16.0367	19.0523	14.4675	15.3159	16.0627	15.7313	15.8661	18.5093	14.6139	14.0589	15.1347	15.2336	16.9337	18.4939	15.2273	13.6581	14.4338	15.2308	15.7738	16.6161	15.7269	15.6111	15.6128	15.1192	15.1424	15.2795	15.2767	14.0721	15.2458	16.5513	24.0864	15.2769	14.8539	14.6293	15.0489	15.3179	14.7419
AVPI1	ENSG00000119986.6	mRNA	18.1585	15.8356	16.1767	15.5353	17.2335	17.1035	17.2402	16.1826	15.9656	15.8958	16.6771	15.68	16.1121	16.3836	15.4669	15.2276	16.1457	16.5397	17.7366	17.0376	16.6137	16.566	16.2074	18.5038	16.4754	18.3667	16.4534	16.45	16.0065	16.2044	15.8537	16.2044	17.0735	16.0781	16.7043	16.5494	15.8015	16.6166	14.0085	15.8053	16.384	15.8014	15.4325	16.3223	16.6861	16.3106	15.848
B3GALNT1	ENSG00000169255.12	mRNA	17.9953	18.3881	17.807	17.5659	17.8177	17.4639	17.3796	18.276	17.3229	17.9313	17.6921	17.9053	18.331	17.348	18.0782	18.1762	17.2633	17.4234	19.398	18.1852	18.9591	18.5979	16.7358	18.0492	18.2219	18.911	18.6524	17.1072	19.4226	18.1113	17.7566	17.4668	17.7419	18.2308	17.6145	19.0017	16.7594	17.5623	17.9052	17.8817	18.0291	18.0967	18.4262	18.3397	18.0926	18.1333	18.0879
B3GALT4	ENSG00000235863.3	mRNA	16.3228	15.6589	15.8743	16.3085	16.4743	17.4508	16.3265	16.4922	16.2076	15.8917	16.9981	15.1937	15.4246	14.726	15.4823	15.4887	15.8913	15.0799	16.4916	16.5633	16.9171	14.3403	17.07	16.1563	15.5534	16.2163	16.2774	15.956	16.2289	15.76	16.6732	16.3173	15.0568	16.0109	16.2649	15.4465	14.3026	16.9766	13.7925	14.938	13.6233	15.4388	15.3154	15.5433	15.9103	15.8482	16.7174
B4GALNT1	ENSG00000135454.12	mRNA	16.1864	17.2079	19.4088	15.3359	16.4699	16.231	14.0299	15.9437	15.1632	15.2935	15.2842	17.4193	15.8127	14.8299	15.0217	14.912	16.8024	21.1534	17.8012	14.2013	17.6567	16.6235	17.3314	17.2706	14.8199	15.9829	15.1856	13.5045	15.3607	15.2778	14.9031	16.3522	17.3207	15.9631	14.7659	15.4446	16.8608	16.7896	16.6688	15.9864	14.4542	17.0693	16.68	15.7643	16.3171	16.8207	15.9038
B4GALNT4	ENSG00000182272.10	mRNA	15.8846	17.5167	18.7916	16.3714	17.9725	17.8477	17.6508	17.2029	19.8538	19.3287	18.824	18.7574	18.7061	18.1291	18.8488	18.8822	19.0046	18.2281	18.6209	16.26	18.5655	16.7284	16.8456	18.573	18.8546	17.1301	17.8314	17.949	17.61	16.0207	19.9333	15.2724	16.8252	19.2815	18.9766	17.9822	18.2999	19.2506	18.6261	17.8574	18.9115	17.8577	18.747	18.2021	18.4033	19.0361	17.6869
B4GALT6	ENSG00000118276.10	mRNA	14.3783	14.6815	13.1136	12.9044	16.5122	15.154	11.5357	11.7334	15.0936	12.8224	16.1018	12.8332	15.4368	13.7348	12.8517	15.7922	13.3024	15.491	16.3216	14.9617	17.4013	14.9008	15.7572	14.8512	10.941	14.2939	13.575	14.1881	16.0765	15.7873	15.2542	14.6998	15.6168	14.0525	13.8778	13.2141	14.9302	11.3774	15.0861	15.4925	15.1214	15.3857	12.8985	13.0793	13.6814	16.8676	13.8117
B9D1	ENSG00000108641.13	mRNA	16.0019	16.2832	15.387	16.1505	17.0329	16.1603	16.1292	16.9078	17.1943	16.2837	16.7165	16.3931	16.8962	16.198	15.9687	16.5703	16.6551	15.5038	17.2218	16.7725	17.28	15.5378	16.9654	16.6078	16.3728	17.7949	16.8829	15.4716	17.7535	17.439	16.6402	15.8759	16.3232	15.8764	16.3311	16.5135	16.9284	17.2616	16.1314	16.0469	16.161	17.1174	16.4548	16.3597	17.2085	15.8841	16.3306
BACE2	ENSG00000182240.14	mRNA	17.0957	16.0274	16.6779	17.7056	16.7295	17.0715	15.9394	18.0131	16.1476	13.9452	15.9313	16.3879	17.6503	14.4193	16.7792	16.9468	15.0825	15.8419	15.3252	16.8068	15.7075	14.058	15.2129	14.7554	12.7451	13.9376	16.9512	18.1327	15.1665	16.4375	14.3569	16.9714	16.4527	16.7153	16.01	17.266	16.2817	15.3829	13.9261	16.5699	14.4185	16.6561	13.5927	16.4296	16.6657	15.3588	15.7223
BAG1	ENSG00000107262.15	mRNA	17.9115	17.8172	17.4126	17.5349	17.5075	18.1276	18.1718	17.7674	17.5311	17.5463	17.2819	16.9609	17.0738	17.7279	17.0892	16.7551	16.2394	17.5881	18.2598	17.5985	18.312	17.0967	17.4281	18.0207	16.7935	17.0505	17.8923	17.847	17.4482	17.4805	17.9361	17.811	17.63	16.8668	17.4203	17.8275	16.4539	17.1433	17.9957	17.0945	17.9913	17.3741	17.895	17.7667	16.7966	17.7422	18.1179
BAIAP2L1	ENSG00000006453.12	mRNA	13.819	11.1099	10.7931	15.1417	13.108	13.4773	12.9507	16.1169	11.932	12.0229	12.4881	11.3217	12.7357	11.7104	12.4665	12.2827	10.6723	11.0545	12.6172	12.0522	11.5057	11.5072	11.0393	11.9064	12.1331	11.1087	11.4888	11.2242	10.9556	10.804	11.3608	14.851	13.5749	12.3091	11.8977	12.5996	10.7271	11.33	11.9023	12.1186	11.4354	11.1933	10.2374	12.5115	12.7563	11.707	11.6436
BANF2	ENSG00000125888.13	mRNA	8.56686	8.23455	10.6881	8.43155	9.39174	0	9.41605	0	10.7899	8.52552	11.7913	8.44574	0	10.3621	0	9.15166	0	9.35338	9.13675	8.38523	0	0	10.4821	0	11.322	0	0	0	9.96992	11.8469	9.53928	0	0	8.13493	0	0	0	9.92948	0	0	12.1857	11.3621	8.1553	9.40359	0	0	9.33702
BASP1	ENSG00000176788.8	mRNA	19.3922	20.8355	17.5636	20.3331	19.6084	19.9104	18.3872	17.4815	17.9573	17.8602	19.2928	20.5829	18.3037	17.9981	18.1499	18.2077	18.1912	20.5651	22.0389	19.6038	20.9302	19.6867	18.6344	20.8618	16.526	17.8943	18.1889	18.7575	17.9995	18.6243	18.0445	18.9036	17.5506	17.3281	18.0456	18.7738	19.9478	17.2451	18.7465	18.7068	15.9443	19.4064	17.0541	17.1741	16.836	20.4909	17.4139
BCHE	ENSG00000114200.8	mRNA	15.2199	19.8703	19.6152	15.4786	18.1687	17.3196	18.4059	18.9245	18.6017	18.4194	17.7237	19.0003	17.3414	18.0482	18.9813	18.6365	18.5903	19.3397	17.7712	19.9121	19.8875	20.5779	18.4686	19.0567	20.0815	20.4972	18.485	18.6177	19.1806	18.5292	19.3894	15.3514	16.1739	19.1251	17.9652	18.8344	19.479	18.0054	20.0037	19.0435	18.8334	18.7452	19.8369	20.1379	15.2484	18.6606	19.5212
BCO2	ENSG00000197580.10	mRNA	11.7653	11.6364	12.4362	11.8609	14.5757	12.2568	11.9	12.853	13.8667	13.1426	13.5177	12.9402	13.1393	11.4992	12.6031	16.067	12.6038	12.9604	13.1877	11.8669	11.7	13.2915	13.0471	11.2483	10.5856	12.28	12.3864	12.6249	13.0732	14.2873	10.8014	13.2954	12.2399	11.0941	14.0665	12.2794	12.8994	11.6656	11.9741	12.8124	13.1118	14.6837	11.3209	12.1024	12.1263	12.5931	10.8212
BEGAIN	ENSG00000183092.14	mRNA	14.2591	15.3764	14.4724	13.2266	14.0641	15.5023	14.788	13.2738	14.7011	13.2907	15.1405	14.5607	15.368	13.6527	14.4264	16.3133	12.4192	13.2184	16.0865	13.1192	13.6926	11.4068	12.0455	13.8632	15.1999	12.9234	14.9742	13.8997	14.9141	12.767	15.7207	13.5877	13.4276	17.0782	14.4928	14.9348	14.6351	13.5989	11.915	13.9675	12.9422	11.7885	15.7178	15.554	14.3616	16.0586	15.6299
BEST1	ENSG00000167995.14	mRNA	14.988	14.9514	13.9429	15.3649	16.7744	15.2814	16.0521	14.4979	16.0121	14.6779	16.326	15.9947	14.8781	14.091	15.6492	14.0938	16.0021	15.6213	16.3186	15.2298	16.2307	15.2179	14.8408	16.9083	13.0239	13.6549	13.4058	14.6455	14.7026	14.305	14.6594	15.124	15.0949	13.8136	16.5089	14.4401	14.7022	15.9987	15.0355	16.1053	13.8046	14.5953	14.9488	13.4918	13.6072	15.2915	13.8465
BEX4	ENSG00000102409.9	mRNA	19.2844	20.9657	20.1323	19.7311	20.6953	20.0485	19.7194	18.8866	19.63	19.8479	21.1432	19.9821	20.6526	19.7688	19.3473	19.8586	19.2627	20.7666	21.4398	21.0495	20.1864	20.5411	19.9563	20.2724	18.1112	19.0789	18.4968	19.5978	20.4714	20.3311	19.426	19.4105	20.0479	20.5762	20.7495	20.7674	20.083	19.2633	20.2983	20.7905	19.1484	20.2509	19.7303	20.4393	18.1453	20.8053	19.4025
BIN1	ENSG00000136717.13	mRNA	18.707	17.976	17.0365	18.4569	18.4058	18.6836	19.5841	18.1019	18.1734	18.2076	19.4769	17.7139	18.8821	17.9618	18.7371	16.9214	19.1203	19.7686	19.559	19.3335	17.3972	17.7546	17.0952	18.8939	17.2949	17.487	18.4676	19.1317	17.2612	18.8185	17.516	17.5397	18.4976	17.4162	19.0574	18.0464	17.0486	17.7559	17.8504	18.4077	16.9281	18.7814	18.6857	17.1867	17.3935	18.6381	17.932
BLOC1S5	ENSG00000188428.15	mRNA	16.9302	16.9934	16.2045	16.0882	16.1682	16.7268	16.2245	16.4072	16.1104	16.4214	16.642	16.5783	16.3499	16.4485	16.5457	16.321	17.0005	16.314	16.5558	16.0849	16.8895	17.0175	17.0227	16.3094	16.7007	17.1253	17.141	17.0189	17.8167	17.3253	16.655	16.883	16.9212	16.1976	16.4226	17.0789	16.1597	17.1337	16.2921	16.5966	15.5816	16.4639	16.7019	16.6838	16.7339	15.9433	16.7477
BMF	ENSG00000104081.12	mRNA	15.7903	16.4462	14.881	17.2436	17.5245	16.1942	16.8172	15.525	15.1107	15.4748	16.1023	15.145	14.7388	15.3199	15.6717	15.043	17.3181	16.3101	15.2492	16.3924	14.1967	15.6813	16.0409	16.2616	14.3085	16.4603	14.3484	15.856	15.099	16.3183	14.4463	15.1516	16.0152	16.0237	15.4692	15.0974	15.9518	15.9739	15.6332	15.6699	14.9094	15.6821	16.1221	15.243	15.5259	14.2551	15.2467
BMP8B	ENSG00000116985.9	mRNA	16.293	17.0332	14.9678	15.4041	15.5874	14.2702	14.5427	18.1969	14.1755	13.1856	15.5189	14.984	15.9198	13.0547	14.0417	15.961	13.5803	17.5817	16.1319	14.9477	17.4136	14.3135	14.7138	15.4437	15.0209	11.7088	13.9877	15.8121	13.1768	12.8186	16.4539	14.4526	14.4201	14.5441	14.6687	17.9542	15.1821	13.8977	14.1603	16.8606	12.5573	12.6777	16.9434	15.7307	13.4925	16.427	14.0358
BNIP3L	ENSG00000104765.13	mRNA	20.633	20.1059	19.4075	19.4663	19.8306	19.7674	19.8669	19.6447	18.9794	19.0683	19.7163	20.4686	20.0867	19.3441	19.9025	19.6585	19.8284	18.9383	19.852	20.1205	20.0014	21.1273	19.7095	20.9083	19.4297	19.7582	20.649	20.3925	21.0774	20.3509	19.4859	20.3414	19.0092	20.0929	20.1588	20.3593	19.427	20.5754	19.6328	20.3331	18.675	20.05	19.7578	19.8177	20.3071	19.8429	18.9059
BOK	ENSG00000176720.4	mRNA	17.0231	17.2069	17.7346	14.79	16.4547	17.0143	18.2895	16.0978	15.3255	16.3048	17.95	16.6052	15.8026	16.8724	16.6488	17.6464	15.5901	17.5911	18.1993	15.3551	18.6148	15.4038	13.7145	19.3095	15.0199	15.2736	16.6453	15.5698	15.9427	13.9536	15.5914	15.0945	16.9476	15.7351	18.6764	15.9236	15.8195	15.9635	16.0084	15.4678	15.6896	14.3933	15.6455	17.6006	13.567	18.354	14.6145
BOLA1	ENSG00000178096.8	mRNA	17.684	17.8454	17.2767	17.5603	17.9654	18.3101	17.9685	17.1157	18.0412	17.8382	17.4548	17.3077	17.1963	17.2499	17.0146	17.0826	17.9957	17.6636	17.9083	17.6912	18.5664	18.188	18.4925	18.3671	17.7364	19.4665	17.8283	16.846	18.8143	17.9365	18.4276	16.6647	17.0752	17.6843	17.7459	17.9868	17.1889	18.0971	17.5169	17.4478	18.2276	18.1194	18.1	17.6179	17.9254	17.3116	17.0335
BST2	ENSG00000130303.11	mRNA	22.1454	19.6871	21.2762	22.0248	21.9547	20.4425	21.5158	20.9693	19.9338	19.7025	20.6849	18.9865	19.3689	21.459	20.5535	20.5983	22.2261	19.4159	19.5135	22.9843	18.7905	19.0121	20.7336	19.114	23.4291	20.2649	21.2687	22.7543	21.5798	21.4586	21.5407	20.1539	22.0487	18.796	18.9088	20.6328	18.0303	21.2965	18.3443	19.8643	19.6316	20.6949	18.1591	20.268	20.3139	21.3106	22.9243
BTBD3	ENSG00000132640.13	mRNA	17.506	18.384	17.0929	17.431	17.1487	17.4734	17.8068	17.8145	18.1298	17.8581	17.8115	17.9946	17.7004	17.9698	17.5884	18.7816	16.9039	19.2259	18.6319	17.678	18.2234	18.4725	18.2559	18.3106	18.2946	17.7843	17.8078	17.2806	18.7391	17.3742	18.1049	17.3216	17.4485	17.8499	18.2177	17.5838	18.5942	16.8261	17.7706	17.3449	17.5557	17.7287	17.9905	18.6359	18.0195	18.1008	18.1308
C10orf90	ENSG00000154493.16	mRNA	14.2691	12.3863	11.6615	13.7607	15.1413	14.0933	15.4814	15.0078	11.6447	14.9746	15.3364	13.162	14.8503	14.4532	14.4689	14.4544	12.9997	14.0715	15.4651	14.293	14.4815	15.0898	14.0208	15.4006	15.0246	12.0216	11.7394	14.8779	13.9112	13.1315	14.4617	14.8729	15.3686	14.2757	16.2196	13.8975	13.1801	14.1918	14.4042	13.9871	14.3789	13.5328	13.2962	14.8112	14.9754	15.3262	14.2219
C11orf45	ENSG00000174370.8	mRNA	13.052	12.974	11.7583	15.1714	14.7251	13.3474	14.3749	13.9097	14.2593	12.9871	14.1608	13.7707	14.3449	13.7783	13.4593	12.8737	13.7712	13.6408	13.5878	14.3418	11.8611	10.4483	13.6246	12.7613	12.8197	13.6135	13.4435	13.0038	12.6732	14.9401	12.0265	13.8786	13.043	12.3651	13.3172	14.1691	13.39	12.7358	12.0169	13.4251	13.0706	13.6125	12.329	12.0239	13.0486	13.0988	13.7399
C11orf53	ENSG00000150750.6	mRNA	10.3216	9.40433	9.53971	0	8.56585	0	0	0	8.64326	0	0	0	0	0	0	0	8.3473	0	0	0	0	0	10.3327	0	0	0	0	0	0	9.21401	9.71152	0	9.36095	8.3068	0	0	0	0	0	8.62351	0	8.73004	8.32718	0	0	0	0
C11orf86	ENSG00000173237.4	mRNA	11.0798	0	8.5633	8.62519	11.7541	0	9.60995	0	12.1211	8.71919	10.1119	8.63938	8.46931	0	0	0	11.9499	8.54919	9.33059	8.57885	9.13056	12.1071	11.8132	10.0645	0	0	0	0	0	11.5557	9.7332	9.9546	9.96687	0	0	9.38777	8.35342	9.53914	10.9543	11.4494	0	14.0704	0	0	11.6424	0	0
C11orf87	ENSG00000185742.6	mRNA	13.1483	12.6225	15.2216	10.483	11.4447	16.0966	14.9887	13.1922	10.9376	12.8159	14.9407	14.0946	13.6235	14.0723	12.2876	10.205	15.0238	13.1187	16.728	13.6751	13.9271	11.3828	12.8385	14.3684	10.2073	8.40295	11.9828	12.769	14.4382	11.5093	11.6319	14.9701	14.7887	14.6219	11.6676	13.2562	14.3204	10.8724	11.5321	14.9133	11.7028	16.3755	11.2055	11.416	7.92335	15.0278	11.3899
C17orf100	ENSG00000256806.3	mRNA	15.3919	17.3806	16.1083	14.4996	16.4823	15.4419	14.9258	14.6147	16.5842	15.8787	16.327	16.4415	16.2267	16.2802	16.1601	16.7783	16.1305	16.8415	17.3577	16.4899	17.546	17.3663	16.8732	17.0981	16.1601	16.9158	15.8599	16.2267	17.1055	15.7452	17.1917	15.5681	14.903	16.442	16.6023	16.0447	17.3096	16.3516	16.2762	16.412	15.9189	16.9647	17.2813	16.6996	15.452	16.6883	16.4599
C17orf97	ENSG00000187624.8	mRNA	15.9061	14.3415	15.9942	15.3731	15.4207	15.8159	16.1417	16.1586	15.5945	14.4556	16.2772	14.265	16.0687	15.5785	14.997	15.0949	15.9874	15.4097	15.1653	15.3208	16.4488	14.6529	16.8206	14.6137	16.0416	15.5616	16.1959	15.4722	15.6652	16.103	16.2094	16.0522	16.3265	16.34	15.575	14.621	16.3602	16.7599	14.209	15.7993	14.8667	17.2819	15.878	16.1086	15.2839	15.9213	14.2688
C19orf33	ENSG00000167644.10	mRNA	12.2864	12.69	10.5045	11.8878	12.528	11.6294	11.8744	9.48177	11.9276	11.2453	11.4701	9.58162	10.4103	11.0847	0	10.2884	10.8943	11.4898	10.2735	9.52101	12.8795	0	11.8827	11.5925	0	11.6526	9.40515	0	14.1067	10.1785	11.261	12.8973	11.6468	10.8537	10.3981	10.9153	0	10.4822	11.1613	0	10.003	10.6932	11.289	14.8616	10.5868	9.38246	10.4739
C1QTNF1-AS1	ENSG00000265096.1	mRNA	10.0558	0	0	8.92173	14.7637	10.9829	9.90683	9.83458	9.96003	0	9.82446	9.93446	0	0	0	0	0	8.8457	0	12.9599	9.4273	0	11.9728	9.36253	0	9.42253	0	11.2886	11.0455	9.53247	0	11.251	9.67945	9.62301	0	0	8.64982	8.83758	11.2514	10.9395	11.9402	10.6314	0	0	10.5251	8.73693	8.82936
C1QTNF2	ENSG00000145861.7	mRNA	15.0369	13.775	14.9949	14.8829	14.0989	16.2756	15.0598	14.0967	15.1995	14.0493	14.3596	14.8405	14.708	13.871	14.5257	13.8271	15.7199	14.4402	14.7881	15.1056	14.9987	12.8199	16.7825	15.0163	15.3193	15.439	14.0049	13.0112	15.4873	14.7328	14.4354	16.104	14.1378	14.2541	13.599	14.7014	14.6825	15.693	13.7162	14.5717	14.056	15.3463	15.0346	14.9114	14.7264	14.2325	15.5328
C1RL	ENSG00000139178.9	mRNA	18.2569	15.9765	15.93	17.9059	17.3333	18.469	18.5814	17.443	16.6662	16.8922	17.7519	16.6273	18.0888	16.6122	18.2394	15.5501	17.9685	15.2805	15.9605	18.376	15.7253	15.0432	16.1404	15.0179	16.5745	16.0642	18.2873	18.8137	16.7845	19.407	17.4019	18.7545	16.6561	17.5723	18.1978	18.1087	16.8307	17.4795	15.7962	18.4892	15.0612	18.0442	16.2214	16.937	17.2971	15.5745	17.252
C1S	ENSG00000182326.13	mRNA	21.0066	18.2233	18.3478	20.8804	20.1985	20.6134	20.3805	19.772	18.6876	18.5896	17.7957	19.3092	19.7014	18.0264	19.8233	17.3744	19.1105	16.3016	18.3964	20.2893	16.3308	16.2621	16.6238	16.7257	18.9657	18.6704	20.0294	19.9875	19.701	21.8579	17.9694	21.84	19.363	18.4993	19.1328	20.3413	16.9107	19.3633	16.509	20.8462	17.7018	20.1101	16.9075	18.7953	19.5678	17.3569	18.9219
C1orf115	ENSG00000162817.6	mRNA	16.761	15.9086	16.1957	15.1639	15.5154	17.1442	15.7779	13.8825	15.6053	16.3966	17.0243	15.3647	16.6175	16.7232	16.0189	15.8694	15.4296	15.6364	18.2543	16.7006	14.9172	14.8311	14.459	15.1761	17.7889	15.3611	15.3574	14.4096	14.5338	13.5171	15.1908	16.0442	15.9336	16.31	16.4724	16.2521	16.5617	15.1116	15.3077	15.5059	16.8782	15.9286	14.7574	15.8921	12.206	16.972	17.0024
C1orf61	ENSG00000125462.15	mRNA	15.6148	20.3483	20.7732	15.64	21.2124	20.3815	20.3447	16.3214	21.4287	21.5184	21.0614	20.6519	20.4419	20.4467	20.3227	21.349	20.8979	21.28	20.7891	19.8107	20.547	21.8287	20.5445	21.5928	20.2051	22.4467	20.5635	17.9296	21.8883	18.1533	21.599	16.4362	17.0493	21.7994	20.0334	20.1893	21.0479	20.4527	21.3704	19.0457	22.0621	20.3282	20.8881	20.8092	20.3912	20.2299	21.6707
C2orf91	ENSG00000205086.6	mRNA	8.57963	9.98095	8.79641	12.2131	10.7252	0	12.3339	11.2936	11.2879	10.4099	12.8256	9.19383	11.0919	11.3743	12.3527	9.16444	8.92316	10.4805	9.14953	10.7165	8.94954	8.75887	8.17697	0	11.5153	0	9.50207	12.5822	9.98272	11.2749	8.55399	7.19669	12.3423	6.57286	13.0088	12.5264	9.39218	6.78403	6.87768	10.9634	8.2959	8.57079	10.1643	10.737	8.87865	10.9926	11.8923
C3	ENSG00000125730.15	mRNA	20.3268	19.7925	19.6104	22.1586	21.9538	22.9079	22.4516	21.0608	21.1214	20.8218	22.1216	20.269	20.8551	20.4867	20.7286	19.8465	22.333	21.7495	20.6942	22.7068	18.2007	19.0167	20.5856	20.7168	20.2151	21.3172	21.3359	23.9051	20.9962	23.0129	19.7146	22.0061	21.5509	19.7572	21.9384	20.7299	19.1358	20.4229	19.3011	22.094	18.5396	22.2182	20.1546	19.5221	20.7547	20.292	20.4276
C3AR1	ENSG00000171860.4	mRNA	19.5861	18.2267	17.6006	20.3201	19.2938	18.9785	20.0294	19.5961	17.7878	17.0667	19.3914	17.9331	18.5192	18.1371	18.7222	18.0576	18.5877	18.8152	18.5655	19.829	15.8743	17.3335	19.4759	18.641	18.2663	19.4167	18.1309	19.5486	18.0318	19.2714	17.0726	19.3162	18.8249	16.5788	17.9722	19.473	17.4157	17.4451	16.948	18.5985	16.0744	19.4153	17.42	16.9899	18.2103	17.4881	18.0196
C3orf14	ENSG00000114405.9	mRNA	16.4384	14.4488	17.44	15.6464	16.8981	17.0234	14.3806	15.7805	16.995	16.6135	16.7184	16.8469	15.8736	16.3949	16.2364	16.7865	16.7349	15.6112	18.2699	14.2601	17.9821	13.6664	12.1816	16.8479	16.0352	13.7311	17.0816	15.3529	16.9137	14.8172	16.004	15.7879	13.4693	16.486	16.6083	17.5321	17.0321	12.4188	16.2454	15.6303	16.9258	16.6049	16.9719	16.9388	16.1364	16.2744	16.5759
C3orf18	ENSG00000088543.13	mRNA	16.4135	16.4555	16.5167	16.5659	17.8215	17.3825	17.509	17.41	18.0373	16.7003	18.0189	16.3881	17.5733	17.3233	17.1777	17.1163	17.8011	16.9712	17.8978	17.1754	17.7392	17.0753	16.6426	16.2511	16.7072	17.0197	16.9969	16.8605	17.4451	17.614	17.3003	16.279	16.7194	17.4828	17.2416	17.3691	17.3644	17.7776	17.735	17.484	18.0275	17.6959	17.2442	17.3996	17.9082	17.1825	17.8047
C3orf52	ENSG00000114529.11	mRNA	13.4591	10.2523	10.8026	13.6009	12.5812	12.0431	9.26776	13.1001	12.0469	9.37525	12.1375	9.75418	10.647	8.80064	10.3621	9.17303	12.7636	11.2033	11.7934	11.6923	12.9949	10.9872	9.47211	8.72385	7.8572	8.78379	10.4393	10.2342	9.40705	11.749	10.0906	13.3788	7.63005	10.3043	9.91919	11.598	10.3294	9.65574	9.99086	11.8842	8.71837	14.0131	8.81228	10.6462	10.0011	11.1817	10.0945
C3orf67	ENSG00000163689.17	mRNA	9.46594	10.5186	10.4248	13.8663	11.1142	11.499	11.1385	12.8731	8.67115	8.89496	11.7991	12.3005	13.5749	9.02358	9.12756	10.9049	13.0645	11.6395	10.9792	11.2258	14.646	11.8504	9.06271	9.24167	7.20967	7.13971	9.05296	8.00264	9.63014	10.2407	8.06508	11.3523	7.71552	8.33467	8.04969	8.97968	9.26448	8.54731	12.2529	9.55661	7.656	10.5629	9.0538	8.60558	7.97582	11.1711	8.70858
C4B	ENSG00000224389.7	mRNA	16.5934	16.4429	16.3519	15.1645	13.8643	16.7451	14.9786	15.5977	16.0362	16.1914	16.9849	16.3106	15.7733	15.2026	16.9175	12.6424	16.6612	18.3485	14.2405	16.5744	13.3257	14.43	16.7766	15.6189	17.5893	15.067	17.3771	17.6947	16.7761	16.2476	14.8238	16.5958	16.4105	17.2445	17.1419	15.6458	14.9502	16.7258	14.4992	17.7452	12.4283	17.3862	16.0803	15.9158	15.9115	15.8929	15.1932
C4BPB	ENSG00000123843.11	mRNA	8.89298	0	0	9.97808	11.302	11.8181	9.1584	11.0842	10.3801	8.85162	9.66015	8.7718	8.01857	9.42692	6.87153	0	7.91832	7.10363	9.46312	11.0304	7.68279	0	0	0	8.74478	0	9.59364	10.9987	11.7983	8.78434	0	9.5029	6.94003	6.88399	0	10.8411	9.22111	8.67347	0	9.51324	7.61278	10.4671	0	9.46736	9.77628	9.30829	0
C6orf118	ENSG00000112539.13	mRNA	10.6493	13.1226	15.4825	13.2905	13.0601	15.4127	11.3929	11.8679	16.2688	14.2259	14.069	15.2195	14.468	13.0654	14.1368	15.4824	14.3188	13.5362	13.6602	11.9812	14.278	13.4132	15.4706	12.6066	13.563	14.7617	14.0024	13.7751	13.8012	15.212	15.5158	14.4633	14.664	13.474	13.395	12.599	14.8507	14.869	13.0732	14.5199	14.351	17.0634	14.2227	15.2417	14.7145	14.4271	14.1364
C6orf120	ENSG00000185127.6	mRNA	18.374	17.8068	17.6395	17.8167	17.635	18.0445	18.0768	18.1582	17.4765	17.5633	18.3946	17.9747	18.585	18.2979	18.7076	17.8011	18.4134	18.1928	18.2238	18.7465	17.8397	18.3455	17.2703	17.4632	18.0187	18.7578	17.3396	17.9547	18.7429	18.1436	17.2129	18.2811	17.0799	17.6757	17.9664	18.3534	17.0235	18.0715	18.9824	18.1871	18.0919	18.1456	18.3205	18.1976	17.9477	17.7207	17.2559
C8orf33	ENSG00000182307.11	mRNA	19.7507	20.3489	19.9106	18.6877	19.6629	19.2219	17.7494	19.8029	19.788	20.1185	19.353	19.2668	20.1276	19.8045	19.5657	19.3993	20.2826	18.3386	20.191	19.8167	19.4995	19.2466	20.067	20.15	19.9398	20.4739	20.0945	19.1325	20.7887	20.2308	19.714	18.8669	18.832	18.8612	19.2678	19.7712	20.2513	19.4682	20.47	19.5673	19.3375	19.6162	19.8726	19.9046	19.9165	19.0229	20.2461
C9orf116	ENSG00000160345.11	mRNA	15.1936	15.8814	15.9084	17.2765	16.241	16.8919	16.4124	16.836	17.1877	16.6269	16.5256	14.4766	16.5556	15.811	15.6938	15.6289	16.0842	14.4021	16.4018	14.9013	15.2714	15.3302	17.4555	15.6409	14.2151	17.2955	17.5359	16.1341	17.4423	17.4891	16.1194	15.8945	17.3256	16.4244	16.5367	16.0338	16.7505	16.9113	15.7554	16.062	15.6062	18.7393	14.9601	15.8871	17.4379	15.4435	15.4852
C9orf64	ENSG00000165118.13	mRNA	17.2583	14.9234	17.3836	18.1201	17.2484	17.608	17.7005	17.7599	17.2268	17.1202	17.5486	17.1195	18.0748	17.2804	17.736	17.2547	18.237	15.0025	16.7309	16.9924	17.7551	15.1022	18.2582	16.6565	16.4805	17.4438	18.0212	17.5091	16.7882	17.2802	17.7641	17.1867	17.5259	17.9832	17.5694	18.0847	17.8044	18.1109	13.5393	17.3001	16.7484	17.6201	17.3996	17.7794	17.8776	17.2521	17.1093
CA5B	ENSG00000169239.11	mRNA	15.34	13.1197	15.5409	14.2457	15.3513	14.4997	14.3269	14.9331	15.1754	14.7115	14.4033	14.5932	14.2871	14.9784	14.5013	14.7044	16.0573	14.1365	14.6573	15.0354	14.2901	14.0534	14.0645	14.4533	14.6076	16.6405	14.6572	14.2766	15.8909	15.7605	14.4617	13.824	15.3249	15.4734	15.483	14.8042	15.5027	15.3976	13.602	14.7494	14.9757	15.6547	14.4405	14.17	15.4919	15.0107	13.7993
CABLES1	ENSG00000134508.11	mRNA	15.5832	16.2362	15.0239	15.3538	15.6856	16.3118	15.7156	14.8038	14.8398	16.2345	15.9351	15.4595	15.1805	14.9479	14.7787	13.618	14.5216	16.3882	16.8541	14.9921	14.548	16.2686	14.8861	15.191	14.6316	15.152	14.0111	14.5646	14.5827	14.6044	15.3739	14.8967	14.7578	14.7767	14.8969	14.5677	15.7092	13.0839	15.2996	16.2018	17.8445	15.0944	16.522	15.9899	13.91	16.4701	16.0644
CABYR	ENSG00000154040.19	mRNA	13.4753	13.3161	12.8749	15.1363	14.5399	13.7026	12.7413	12.254	13.1602	12.8764	14.6236	12.3165	12.8049	13.2167	13.472	12.268	13.2236	14.629	14.8271	12.7358	16.5292	11.2769	11.2459	14.5181	12.3814	11.9484	13.1585	12.7455	12.4535	12.31	12.5566	13.8452	15.7673	12.8011	13.4707	13.6887	13.3816	11.1403	13.0186	13.7607	12.5348	13.8392	12.4496	13.6865	11.9328	14.8115	13.4374
CACFD1	ENSG00000160325.13	mRNA	16.7777	18.8932	17.6279	17.1954	16.7969	18.3835	17.6059	17.3107	17.8388	18.3521	17.9901	17.3587	17.3615	17.0862	17.4625	17.1249	18.1126	17.8312	18.4505	16.6307	17.6339	17.583	17.9047	18.5583	17.0663	18.0578	17.9132	17.1572	16.9759	16.7814	17.7908	17.0957	17.2448	17.9863	17.7318	16.8467	17.7659	18.1692	17.9491	17.5214	18.0324	19.113	17.9995	16.8038	17.8143	17.4947	17.703
CACNA2D3	ENSG00000157445.13	mRNA	14.1475	11.1489	13.0265	14.2894	14.5677	14.6396	11.8803	13.0356	14.2399	12.5979	14.5038	12.4928	13.3962	13.6981	12.6574	10.1758	13.5383	12.6356	16.9278	13.0085	13.5614	14.1308	13.0068	15.3207	10.2188	11.9548	12.712	11.659	13.6461	14.2796	12.4281	12.7846	12.8475	10.9335	13.1495	13.5492	14.0665	12.7312	11.2411	13.0919	10.8896	14.967	10.7614	13.9234	12.5968	14.8178	11.1385
CACNB1	ENSG00000067191.14	mRNA	15.2251	15.2434	16.0026	14.5301	15.3242	16.3865	15.2456	14.292	16.8886	16.569	15.7934	16.9536	16.192	15.8798	15.6965	16.078	16.0626	15.8563	17.1821	14.8693	16.2387	14.7628	15.0892	16.3372	15.218	14.2022	15.5733	16.098	15.5082	13.5368	15.4809	14.8817	14.8807	15.9914	15.8309	15.6105	16.095	17.0632	15.4891	15.5542	16.7251	14.5954	15.257	15.1988	14.7974	16.6652	15.1096
CACNB2	ENSG00000165995.17	mRNA	16.2973	15.4404	14.7239	15.9611	15.8125	15.031	11.7911	14.1935	14.7119	13.062	15.4307	14.9819	14.7421	13.5118	14.2889	12.2398	12.363	15.6988	16.1548	14.7862	14.0155	14.3085	11.352	14.1641	11.5402	10.8326	14.9107	13.8871	14.7293	15.5954	14.3092	15.8842	12.7007	15.0351	13.9343	15.1911	15.9605	12.5519	12.7404	14.433	14.3908	12.7791	12.9056	13.9736	16.3986	15.2418	12.4942
CALCRL	ENSG00000064989.11	mRNA	17.5198	18.9112	16.6644	19.1584	17.4419	16.3131	18.0424	17.2809	17.0701	16.6625	15.8508	16.3829	15.8616	15.9923	16.0969	17.9231	16.3968	18.6159	18.0489	18.667	19.5091	20.0595	18.4006	18.2851	14.661	19.9948	15.8219	15.8549	18.7115	18.3116	15.6147	16.7028	15.5497	17.5769	16.8998	16.7459	14.6318	14.7838	19.5837	18.7518	17.4323	18.5093	17.8317	17.1292	15.6032	16.7083	16.7955
CAMK1D	ENSG00000183049.11	mRNA	16.257	16.5932	16.5779	16.8429	16.1345	17.2481	16.1567	15.2903	15.9598	16.4364	16.6075	17.5179	16.6859	16.1701	16.7076	15.5065	16.3008	16.7241	17.7284	16.2078	16.0205	15.9463	16.1383	16.3403	16.413	15.751	16.0529	16.3946	15.6341	15.5118	16.3019	16.1686	16.0815	17.3741	16.5929	15.9945	17.3727	16.2165	15.9548	16.5834	16.8567	16.2503	16.2443	16.4156	16.1045	17.699	16.2177
CAMK2D	ENSG00000145349.15	mRNA	18.2373	18.1366	18.1311	19.4878	18.9322	17.9901	19.2884	19.2694	18.0092	18.8813	19.0079	19.0751	19.823	19.2879	19.1149	19.5344	18.0709	17.9218	18.0333	19.5101	18.4079	18.7507	17.6515	18.0179	18.9841	18.8986	19.4709	19.6674	19.3151	18.6791	19.3669	18.9376	18.021	19.2873	19.2917	18.7736	19.0987	18.629	19.4588	18.3336	19.3725	18.5936	20.0088	19.2305	19.3878	19.2835	19.0813
CAMSAP3	ENSG00000076826.8	mRNA	12.8368	16.2667	16.3215	9.40184	13.2271	15.1477	13.179	10.6774	16.1675	15.4647	15.0549	14.8403	14.9907	13.3841	13.2012	15.7939	12.6394	14.0937	16.1509	11.5464	13.1864	11.815	10.7844	16.8267	10.4874	10.417	13.0594	12.5164	13.1997	10.2053	12.5099	10.2471	11.2099	15.672	14.1921	13.6512	14.9888	11.2091	15.5214	14.7262	11.7293	13.7527	12.1982	15.2283	8.61641	16.0849	11.5877
CAPG	ENSG00000042493.14	mRNA	21.2515	18.8251	19.3815	21.0804	20.6485	21.3439	21.2326	20.6886	19.8465	19.802	20.7173	19.1767	20.0403	19.4151	20.1978	19.1562	20.7792	19.0853	19.6553	20.8036	18.9266	18.0768	20.6044	20.0816	19.899	20.7156	19.7042	20.6763	19.9371	20.3444	19.3455	21.2003	20.9888	18.9408	19.8996	20.997	18.8069	20.6978	17.5761	19.2108	17.5501	20.4071	18.9976	19.0808	20.5679	18.7556	19.7924
CAPN1	ENSG00000014216.14	mRNA	18.3855	18.0104	18.1772	18.3968	18.525	19.2884	18.776	19.0386	18.7223	18.3834	18.912	17.9027	18.6967	18.3345	18.5008	17.8118	18.9723	18.1005	18.4083	18.5449	18.9071	17.4086	18.7982	18.5365	18.6425	19.055	18.9597	18.7567	18.4207	18.2151	18.6795	18.539	18.2898	19.0063	18.611	17.9073	17.54	18.7016	18.533	18.1374	18.2835	18.9298	18.4191	18.4946	18.4625	18.2459	18.8458
CAPN10	ENSG00000142330.18	mRNA	15.4907	15.6258	15.6054	15.4079	15.9065	15.7239	15.7959	15.958	16.8429	16.6987	16.0347	16.0433	16.2062	16.1052	16.0166	16.377	15.958	16.3471	16.1053	15.9745	15.5609	15.2072	15.5784	16.2851	16.1973	15.5374	15.8733	15.6193	15.406	15.4117	16.6769	15.3512	15.5746	16.3178	16.5349	15.5529	16.0198	16.1887	16.6119	15.6978	16.275	15.7609	15.9683	15.813	15.3025	15.9454	15.9445
CAPN5	ENSG00000149260.13	mRNA	17.9047	19.327	18.0436	16.3293	18.0943	18.4437	18.0687	19.1487	18.3491	18.3289	18.4904	19.4557	19.8257	18.4147	18.9027	19.4836	18.341	19.131	18.868	17.8388	19.9985	17.8226	19.0166	18.37	18.0752	18.8732	19.5652	18.4678	17.9175	17.5393	19.8515	18.0003	18.6581	19.129	18.0597	18.2223	17.3819	18.0073	19.5693	18.6303	17.3671	19.4715	20.6668	18.8663	18.3659	19.1944	18.5743
CAPS2	ENSG00000180881.18	mRNA	13.9353	13.8424	14.3035	14.0579	14.8772	13.476	13.5316	13.5571	14.4291	14.7172	14.5665	13.3798	14.4667	13.0832	12.5586	14.9986	14.7219	14.2358	14.7764	14.1521	15.608	15.1464	15.7567	13.8167	14.0916	14.2727	14.1692	13.9226	15.8052	15.2896	13.9786	13.6682	14.2698	14.068	14.981	11.3511	14.1307	14.2277	14.6089	14.8579	13.6077	14.5893	14.0349	14.0554	14.7059	14.8785	12.4098
CASP1	ENSG00000137752.21	mRNA	17.7955	16.3937	16.974	18.6625	17.5151	17.6154	18.1529	17.1431	16.3926	16.4361	17.7871	16.642	17.0144	18.0476	17.7441	16.7927	17.436	16.4018	16.1277	18.8259	15.1751	15.8825	17.1886	15.8954	18.9096	17.6399	17.9097	17.7807	17.9589	18.4803	15.5309	17.8548	17.0708	16.8867	16.7532	18.3572	14.9044	17.4743	14.7737	17.1783	16.5781	17.4104	16.3827	14.9786	17.124	15.6107	18.0252
CASP3	ENSG00000164305.16	mRNA	19.4333	18.4412	18.7756	18.9439	18.3494	18.5131	18.0333	19.0958	19.6109	17.8725	18.9409	19.9245	19.4989	19.762	19.1469	19.4013	19.0148	18.0805	19.1816	19.2784	18.7024	18.7786	18.3136	18.4232	18.3566	19.4119	18.9357	18.3652	19.6541	18.7256	17.792	19.0247	18.5781	18.9852	18.6597	19.1215	18.7984	18.6381	18.146	18.0249	19.9952	18.4245	19.4027	19.0489	18.3656	18.8524	19.6984
CASP7	ENSG00000165806.18	mRNA	17.3098	15.9239	16.0728	17.2668	17.7587	16.2733	17.2963	17.9264	16.5286	16.2423	16.578	15.8357	17.3231	16.8447	16.3116	16.749	16.1616	17.0941	15.7023	17.4589	18.228	16.3167	15.8851	15.2465	17.1496	16.4883	17.0798	16.1301	16.6944	16.6897	15.8218	17.1646	17.2988	16.3854	16.7974	18.0489	16.9524	16.4394	15.4089	16.4794	16.4945	16.9549	15.5444	17.2077	17.6364	16.0372	17.0059
CAV2	ENSG00000105971.13	mRNA	18.1141	16.0972	17.3197	17.883	17.7013	17.1204	15.1536	18.6475	15.2278	17.7513	15.592	16.9783	16.8985	15.1854	15.3347	15.3628	14.5782	14.8399	15.4167	17.9615	17.4766	15.0325	14.9685	15.3418	14.1328	15.6174	18.0501	15.6964	18.3106	17.0959	16.7337	18.528	14.4245	16.4693	18.4734	16.6903	15.0499	14.5004	16.342	18.2885	15.527	16.2535	15.0595	16.8607	15.0221	15.809	14.7591
CBX7	ENSG00000100307.11	mRNA	16.3952	15.423	15.7685	16.3127	16.2412	16.754	17.1764	15.6943	16.7124	15.4125	16.7424	15.0472	15.8873	15.653	15.6776	15.8076	15.9269	16.232	17.7972	16.5533	15.4214	14.5703	17.3114	16.4906	15.0335	15.041	15.4777	16.5615	15.3051	15.8713	15.1456	16.0825	15.2042	15.7567	16.7019	16.2522	15.9282	15.4607	15.5944	15.9682	15.1705	15.4137	14.2849	15.751	15.8132	16.1418	15.5599
CCAR1	ENSG00000060339.12	mRNA	17.334	17.4661	17.3182	16.1901	17.3234	16.7803	16.997	17.114	17.3683	17.4791	17.4295	17.7186	17.26	17.494	17.5794	17.7334	16.9872	17.8879	17.1117	17.1044	17.7025	18.2159	17.7944	16.5848	17.2406	16.9613	17.1428	17.2249	17.1892	17.0134	17.4626	17.5534	17.5459	17.095	16.953	17.7369	17.663	16.9244	17.2025	17.3143	17.6673	17.6188	17.8545	17.5136	17.3954	17.3295	17.5031
CCDC120	ENSG00000147144.11	mRNA	11.501	15.6719	15.047	15.0874	14.1414	15.7406	14.7161	13.8722	15.851	16.1221	15.4496	15.6817	14.6101	15.1957	14.8025	15.8802	16.0068	15.978	15.0197	13.7779	15.7878	15.241	15.0416	15.7883	15.9128	12.2819	14.4504	15.6281	14.0326	13.1574	12.1229	14.199	12.9036	13.7074	13.575	14.1821	15.1103	12.5438	15.7535	15.1291	16.1011	15.9357	15.4097	15.3892	11.5663	16.0176	14.3878
CCDC148	ENSG00000153237.16	mRNA	11.7266	11.9973	12.6662	12.2689	12.8633	12.0104	12.2189	12.0707	13.4129	12.9953	12.917	11.2834	12.7213	12.9248	12.0631	13.9723	12.7123	12.0407	13.4218	13.831	13.1537	13.4321	12.8685	12.5979	13.1914	12.1491	12.142	12.3162	12.8455	14.3398	12.5804	13.5263	12.4063	12.7786	13.0637	13.3833	12.4023	12.535	13.0444	13.1763	13.5727	14.1396	12.3977	13.3303	13.0757	12.8909	12.8766
CCDC159	ENSG00000183401.10	mRNA	15.9005	15.6928	16.9946	15.8739	17.3278	15.4486	17.0781	15.6791	18.0381	16.8561	16.2756	16.4071	16.3936	16.8171	16.4472	17.1136	15.7664	16.5011	16.1948	16.524	16.1206	15.4606	16.0535	16.5067	16.2977	16.6941	15.823	15.7926	17.3997	16.85	17.0017	16.0356	15.4504	15.9851	17.0128	16.6882	16.3115	16.6625	16.2463	16.8216	17.4915	16.1944	17.0557	16.4693	15.8465	16.6179	16.0388
CCDC68	ENSG00000166510.12	mRNA	13.0411	12.1315	10.4349	12.0198	12.7437	10.1456	11.1835	8.99793	10.9959	12.3978	12.331	11.8681	11.9547	10.0159	11.1864	12.6273	11.6657	11.4646	13.951	12.579	12.703	12.3034	11.0863	10.7457	9.65477	10.3206	12.0342	10.4511	12.2852	11.1957	10.8546	11.7821	10.5777	11.98	12.5756	12.1183	11.224	10.9359	11.3646	11.6457	11.4561	9.79427	10.0275	13.2903	10.5173	11.6687	11.83
CCDC77	ENSG00000120647.8	mRNA	15.6267	16.711	16.4147	16.0432	15.8386	15.6486	15.9905	15.7433	16.1319	15.851	15.3074	16.5648	15.1211	15.7849	15.87	16.3444	15.9232	15.2245	15.7719	15.8112	16.3982	16.5666	16.8608	15.6516	16.0509	15.6616	15.3447	15.5644	15.439	16.2381	16.1082	15.3242	16.924	15.3795	15.4242	15.8346	16.6376	15.6418	16.2875	16.288	15.7275	15.4459	15.7907	16.5762	15.6467	15.2813	15.7397
CCDC88C	ENSG00000015133.17	mRNA	12.0561	14.8417	15.1373	13.6599	13.3303	15.6546	14.305	11.9555	13.9774	14.6271	14.2747	14.3004	13.5409	14.677	15.587	15.0923	15.0956	15.2045	12.3415	13.738	13.0348	13.3435	14.2134	13.9881	13.7888	12.1279	11.9169	13.7322	12.5823	12.2207	13.1639	14.8621	14.5794	14.761	14.2746	13.6198	14.908	14.3416	14.9683	13.7213	13.5946	13.9789	11.777	13.6835	13.2764	13.5837	13.0299
CCDC91	ENSG00000123106.9	mRNA	15.7456	16.2802	15.6397	15.8948	16.5667	15.684	15.9725	16.0569	16.0531	16.0253	16.3033	15.8244	16.4292	16.1568	16.2357	15.8444	15.9964	16.2789	16.2555	16.4663	16.2282	16.4025	16.391	15.7029	15.5217	16.0735	16.092	16.3385	16.433	17.0193	14.8101	16.4767	16.2407	16.1037	14.3414	16.465	15.6031	15.3984	16.6183	16.3579	16.3236	16.1616	15.9887	16.401	16.0363	15.7743	15.0351
CCL28	ENSG00000151882.10	mRNA	11.0755	10.1953	9.63102	11.6459	15.3712	11.5625	10.6787	12.1908	9.05572	10.6932	11.5027	12.4606	11.6229	10.4332	11.0257	10.8732	10.5227	10.0758	12.7558	10.5526	13.5016	8.59531	9.01081	11.1335	8.85146	10.1942	10.2304	10.9681	12.4805	11.111	8.80446	11.4828	10.621	9.39581	11.3307	12.7223	10.943	10.8556	7.70832	9.5206	8.1325	8.82126	10.0005	9.25268	10.4131	11.4135	8.60239
CCL3L3	ENSG00000276085.1	mRNA	17.5816	18.2328	16.3288	18.0334	13.7999	15.8369	16.9263	15.1109	14.2119	15.3741	16.5491	12.416	9.74436	14.1303	13.5276	14.8938	17.0627	9.82438	16.4302	16.6938	14.9498	14.0218	16.7497	16.8694	11.4716	10.4017	14.0096	14.3272	15.5276	14.4177	13.179	15.3871	13.658	15.3294	18.1872	16.6327	15.8744	12.8737	13.3243	18.2013	12.0724	12.1416	12.4295	15.1336	13.0894	15.2163	12.3092
CD1D	ENSG00000158473.6	mRNA	15.8771	15.1068	13.3355	16.3006	17.0321	14.6674	13.7711	14.4693	13.8455	14.5192	13.7305	14.7774	13.8446	12.585	13.9869	13.1738	14.6689	14.7083	17.8185	15.5754	13.011	12.405	15.0362	14.6778	13.5172	14.9669	13.7441	14.3517	14.0456	15.2157	13.1995	14.5205	13.2374	12.9232	14.0832	15.0536	12.554	14.1673	14.2771	14.9363	10.7189	14.1277	12.0641	14.1947	13.8672	13.2933	13.7944
CD24	ENSG00000272398.4	mRNA	17.4796	21.4957	20.1509	14.8079	17.6463	18.3182	13.8394	14.6117	16.6594	20.147	15.8802	21.6695	16.3105	13.1259	17.9151	15.8964	18.3701	20.4498	19.9113	16.0588	18.0965	20.312	18.385	21.6754	14	14.5852	15.8437	17.421	18.6144	19.9684	15.0484	16.9662	19.4668	17.8844	18.3292	17.8686	25.8624	19.0925	18.8022	20.8814	14.6854	21.1927	14.4923	14.552	18.2821	16.9716	15.088
CD247	ENSG00000198821.9	mRNA	13.6218	14.0078	14.2209	15.5536	13.8958	13.7275	12.1289	13.1109	13.2542	12.595	12.6679	11.5152	11.023	12.5978	12.5467	12.1934	14.5246	11.9903	13.0872	13.2861	13.8226	10.343	13.4341	12.386	12.1295	13.3584	11.8238	13.3553	13.6458	13.169	11.6109	11.7736	12.6158	11.4665	11.496	13.4022	12.6287	13.4163	12.2933	13.1622	12.4629	13.269	12.2522	12.153	11.4011	12.2567	12.5972
CD55	ENSG00000196352.12	mRNA	18.5434	16.159	15.1311	15.9781	17.2151	16.4358	16.2616	16.0668	14.8999	15.3094	16.4058	15.6378	15.9309	15.9747	15.6782	15.3221	15.5862	15.7034	16.6746	17.3693	14.7816	14.8989	14.7304	16.3937	14.5909	16.1514	15.5412	16.0254	16.3786	16.2188	14.9644	17.2955	15.3082	15.6493	16.0202	16.8632	15.165	15.3114	15.0239	16.2242	14.7112	16.1679	14.3333	15.4811	15.1911	16.0602	15.1486
CD83	ENSG00000112149.8	mRNA	19.428	17.1877	17.8327	19.1645	17.0103	18.3961	18.0737	17.0654	17.0938	16.7226	17.5378	16.7933	17.6593	16.7031	17.7537	16.6021	19.0207	17.3735	17.4619	17.9726	16.7693	16.677	18.5555	16.7281	17.5027	17.0258	17.0033	18.2551	17.3344	18.5573	17.3931	18.0361	17.7546	17.2151	17.0387	17.1604	17.2895	17.7748	17.0798	18.3462	17.2412	18.1887	16.3137	16.8918	17.2452	17.1844	17.336
CDA	ENSG00000158825.5	mRNA	16.5102	16.391	15.5755	15.4624	16.9408	15.794	16.7107	15.6189	15.9965	16.4269	14.5823	14.7189	15.8114	15.8111	15.773	15.4132	15.8951	15.4764	16.5726	17.1104	15.2371	14.631	15.383	17.1063	15.8173	17.3076	15.2202	15.2698	15.1648	15.8388	15.8146	16.9622	15.5277	15.9111	16.9739	14.6416	12.8208	16.1151	16.2997	16.5726	16.1922	15.3355	14.0038	17.8132	14.751	15.2138	15.0006
CDC37L1	ENSG00000106993.10	mRNA	17.6359	17.1441	16.8491	17.1877	16.6777	16.815	16.6137	16.835	16.5961	16.1415	16.2591	16.9851	15.9478	16.8991	16.9706	15.9885	15.7649	17.017	17.5093	16.5379	17.9056	16.7989	16.7904	16.6213	16.6955	17.2267	17.2785	17.0412	16.9812	17.7624	16.5481	16.5296	16.3311	15.5614	16.6585	17.8511	16.8956	17.0379	17.2206	17.0635	16.8587	17.1069	15.8582	17.1118	17.116	17.1565	16.2148
CDCP1	ENSG00000163814.6	mRNA	17.0732	14.2957	13.1924	17.0084	15.8313	16.3071	15.5436	17.7281	13.4642	13.5558	16.7112	15.941	14.956	13.9709	15.9242	13.6635	16.1697	15.1296	14.1122	15.3127	15.5499	13.4596	14.4571	14.0179	13.7391	14.5695	15.3924	16.5148	13.278	14.5731	13.2077	17.8153	14.4611	16.7807	13.6989	15.9182	13.0544	14.4792	12.8776	14.5836	10.5108	16.3449	12.9233	12.3891	17.369	13.7097	13.8293
CDH3	ENSG00000062038.12	mRNA	15.93	15.2279	11.296	14.0987	10.4394	12.2919	13.3545	10.9506	13.2794	12.9951	12.0396	14.2815	13.0833	11.6217	11.6465	14.0947	12.9372	16.0634	14.2838	10.09	13.0203	14.6043	14.6396	14.6471	10.971	11.2541	13.2358	13.2558	12.857	12.9487	12.7135	16.3164	13.0317	11.8379	13.9053	11.8256	12.2598	11.502	12.648	14.8922	11.1244	15.12	13.2086	13.9573	13.9282	14.0543	10.8369
CDH4	ENSG00000179242.14	mRNA	15.4486	16.6087	17.9588	13.1809	15.5605	17.4031	16.9075	14.9713	17.6171	18.274	18.5679	17.7138	17.1988	18.0057	17.3924	17.983	17.7389	14.5295	16.6091	16.4111	16.2902	14.3507	16.0116	18.0925	17.5819	15.9744	17.9616	15.1084	16.7488	15.8904	18.2733	15.3697	16.5636	18.5147	17.8811	15.1301	16.1193	16.9537	12.6451	16.2168	19.2127	17.8634	18.7494	18.8245	16.6828	17.2061	17.5962
CDIP1	ENSG00000089486.15	mRNA	17.7502	18.6491	18.6141	17.9326	19.3798	19.2827	18.988	17.995	18.7769	18.2725	19.5176	18.112	18.6905	18.3813	18.5999	18.14	19.1719	18.4992	19.4905	18.638	18.0483	18.8062	19.8943	19.3821	18.8938	18.7593	18.4433	18.1417	18.47	18.4115	18.9104	18.3423	19.4167	19.4503	20.1019	18.1678	18.909	19.0679	18.6508	18.7528	18.3987	19.394	18.7413	18.6671	18.6143	19.106	17.4493
CDKN1A	ENSG00000124762.12	mRNA	20.5182	18.7489	19.0337	20.8661	19.8409	20.9687	21.671	21.1316	18.9251	18.5091	20.4173	18.9638	20.6815	21.1651	21.0161	20.6365	20.0412	19.2556	20.2281	21.4178	17.8013	18.4012	20.5788	21.0323	20.737	21.3762	20.628	20.3497	20.0506	20.2477	20.0334	23.4124	19.7956	20.3406	20.0226	19.7658	16.6897	20.6962	18.8598	19.3441	17.8748	19.322	21.0493	20.5191	19.109	19.7413	20.1857
CDKN1C	ENSG00000129757.11	mRNA	16.7213	16.9623	15.7076	15.8905	16.9682	16.8283	18.3419	16.0123	16.1304	19.157	16.7816	16.5124	15.1874	15.6702	16.1595	17.314	16.31	17.8175	17.7805	15.3765	16.9235	14.7561	15.4049	18.8519	16.1417	17.2666	16.8295	16.0914	17.0891	16.0047	16.9613	14.9693	16.6408	15.8226	18.0745	15.9382	15.7175	16.7801	13.8482	16.2529	13.4262	16.315	18.4462	16.9398	14.8495	16.1106	17.421
CDKN2A	ENSG00000147889.15	mRNA	20.0052	16.4322	19.3993	19.9696	13.8257	19.0602	21.2819	12.5273	12.4096	13.3086	13.7676	19.7855	13.5873	11.4963	13.5428	12.0315	18.0165	19.5521	13.3444	13.5911	17.5764	15.8251	13.7813	19.0348	14.1974	14.4063	14.5582	14.0666	13.7718	14.0946	12.4196	18.1726	19.9085	12.8668	14.0458	13.9947	18.9301	19.9473	20.6568	12.6577	18.9416	19.3467	12.5223	12.4016	20.6356	12.6991	12.1544
CDKN2B	ENSG00000147883.10	mRNA	17.6411	15.722	18.9323	17.3756	14.4828	16.9339	19.3912	13.8177	12.38	13.0299	14.1617	18.8067	19.0377	13.0856	14.4509	12.8554	16.7686	17.4861	16.8936	13.9816	18.1433	15.857	15.0062	17.4034	12.8798	14.2923	13.5926	14.3048	12.9129	12.9195	12.3507	17.5196	17.3434	13.3188	13.7882	13.6997	18.6537	18.7868	13.1063	13.5407	17.2954	18.6151	13.063	14.8335	19.4305	13.248	12.7099
CDKN2C	ENSG00000123080.9	mRNA	18.5269	19.6118	19.3453	19.1262	18.3344	20.185	19.8549	19.107	19.7156	20.0478	17.9976	19.5454	18.3805	19.4214	18.8823	19.9473	14.8532	19.8355	15.656	18.71	19.5926	19.9784	19.5889	20.9247	20.6102	20.3289	19.6884	18.2743	20.4306	20.6237	19.9619	17.6649	20.4865	19.0008	18.7588	19.1482	19.4211	20.2705	19.2796	18.9583	19.067	19.112	20.2217	19.5815	20.1211	18.5007	19.6837
CDKN2D	ENSG00000129355.6	mRNA	17.4418	18.4853	17.6452	16.669	17.2176	18.0926	16.94	17.9913	17.6428	17.6208	17.365	17.0198	16.9321	16.9795	16.4667	16.6101	17.0848	17.2188	19.3421	17.2204	19.7669	16.6076	17.2149	19.4471	16.8866	17.4157	17.1656	17.0723	17.4768	16.5366	16.9946	16.9118	16.9378	17.2171	17.4612	17.4984	17.0959	17.8849	17.21	16.7104	16.6538	17.9947	17.6094	17.5242	17.736	18.3306	17.131
CEBPD	ENSG00000221869.4	mRNA	20.9086	18.9948	19.9764	19.3573	19.6303	21.134	20.8089	18.9837	18.9761	19.0231	20.0075	19.7327	19.4661	18.0888	19.4385	18.1267	18.585	18.395	18.346	20.6619	17.7798	17.8211	20.3881	18.8177	19.3894	19.6236	20.8021	20.9319	19.6368	20.0791	20.306	20.5194	19.3089	20.7298	19.8282	19.8262	17.9276	20.4416	17.8059	20.3398	18.0554	19.0501	18.2961	19.0283	19.681	18.274	19.2578
CELSR3	ENSG00000008300.13	mRNA	13.2048	16.2488	16.3072	13.5626	13.6844	14.5976	13.4407	12.5816	15.3577	16.1187	14.0847	16.5104	14.9028	14.48	14.8887	15.6134	14.7544	15.5367	15.8775	12.3413	15.4077	13.73	12.7135	17.4595	11.837	11.1005	14.3839	14.0878	12.9823	11.009	14.9023	12.252	15.1768	14.9939	14.8399	14.3023	17.4801	15.8264	15.2833	15.3271	15.4177	15.7211	15.1307	14.074	14.5422	15.704	13.4979
CENPV	ENSG00000166582.8	mRNA	17.4599	19.6041	18.6046	15.0236	16.0794	17.4709	15.3391	15.9156	17.4523	15.6182	16.755	19.756	15.3552	17.9405	17.3288	18.0593	17.5789	19.8068	19.9095	14.9505	19.6797	15.449	17.3137	20.2135	18.824	19.2781	17.8456	15.7563	16.4455	16.9747	19.3146	15.042	15.1596	17.5815	16.2524	15.2049	19.4746	15.0411	18.6405	15.4139	16.0269	14.1327	18.9168	18.9295	14.241	18.2197	17.1844
CERCAM	ENSG00000167123.17	mRNA	19.8017	17.155	16.4545	19.3223	18.4448	18.2713	18.4449	19.8476	17.8361	18.6395	18.3882	17.3991	18.5382	17.7944	18.3276	17.6426	17.8913	17.5681	18.6633	17.6817	16.4362	16.6089	17.4299	17.9426	17.4003	18.0223	17.7757	17.8545	18.3354	17.153	17.1709	18.7928	17.1816	18.0156	19.3875	18.4907	17.1368	17.2023	16.0298	18.2845	17.7854	16.617	17.6509	16.3234	17.6433	16.934	17.7032
CFB	ENSG00000243649.7	mRNA	16.3453	11.1582	12.6954	14.8743	14.7532	14.6987	13.8012	14.106	13.8731	12.7715	13.8095	13.317	13.3105	12.2366	13.3671	13.0899	15.8683	12.2532	12.6471	15.0521	11.4471	11.9079	13.4596	11.3119	14.7199	12.7501	12.5754	16.1602	14.2079	16.5281	11.7026	16.4166	14.4667	12.2505	14.6647	14.0867	11.6333	14.9352	11.0822	15.0191	11.1544	14.5076	10.795	13.4409	13.9861	12.0634	12.6843
CFD	ENSG00000197766.6	mRNA	20.151	16.5519	15.6156	19.7243	18.6438	18.867	18.9734	18.605	16.7894	16.9593	17.7149	15.5939	15.6425	15.2946	15.8241	15.9013	15.7656	15.7323	17.3552	18.3833	14.2956	15.5674	16.5306	16.3158	16.2286	19.4234	16.25	17.225	17.25	15.7306	15.6783	18.6561	17.9122	15.401	16.829	17.6128	14.647	17.2026	15.6666	17.716	16.071	17.5234	15.5217	15.7534	15.8946	15.1889	15.6965
CFH	ENSG00000000971.14	mRNA	18.1271	15.1748	15.3355	17.6699	17.7184	15.4142	15.3472	17.6629	16.0577	15.7685	17.4221	15.1904	15.607	16.846	15.3689	15.2212	16.4785	14.8436	15.7507	16.4475	15.1176	15.2027	17.1081	14.066	18.7955	16.3003	15.5228	16.5631	17.2311	17.4104	15.7112	18.4718	15.3518	16.2213	15.7325	15.9346	14.562	15.0693	16.9352	15.9974	17.7079	15.5863	14.3988	18.1608	14.4141	15.0861	15.3798
CGB8	ENSG00000213030.5	mRNA	0	0	0	0	0	0	0	8.96713	0	0	0	0	0	0	0	0	0	0	0	0	0	0	0	0	9.62395	0	0	0	0	0	0	0	0	0	0	0	0	0	0	0	0	0	0	0	0	0	0
CGREF1	ENSG00000138028.13	mRNA	15.965	16.953	14.8909	16.0097	16.8656	16.1662	15.3333	15.7719	16.1497	14.0887	16.2307	16.439	16.1662	16.157	15.3063	16.3432	13.041	16.8937	17.5659	16.1769	16.4906	16.3772	11.1109	16.7058	17.2149	12.783	16.4271	16.4862	15.5356	15.0365	16.7866	14.5441	12.7433	16.9236	14.9902	17.6681	15.1254	12.0188	16.8017	15.5857	16.666	15.713	17.4504	17.0262	16.1089	17.0523	16.9802
CHCHD10	ENSG00000250479.7	mRNA	18.144	17.035	17.9425	18.6885	19.0879	18.9603	20.4613	18.6168	19.2316	19.4495	18.4248	18.0652	18.0121	18.9239	18.0909	17.9398	17.517	18.2798	18.8472	19.0913	18.4276	16.4549	18.2432	18.2133	18.9028	18.3615	18.9632	18.4238	18.5994	18.5349	18.1202	17.9243	19.592	18.7239	18.3548	19.2648	16.7226	17.9739	19.6338	17.3731	18.699	18.0339	18.1939	18.4947	18.3144	18.2443	18.7746
CHEK2	ENSG00000183765.19	mRNA	16.3784	16.6209	15.8598	15.9323	15.2726	15.1488	15.3788	16.0771	15.4244	15.5238	14.8207	16.3146	14.5388	14.9469	15.4509	14.9497	15.1541	15.6034	14.6547	15.682	16.5538	15.1112	15.4929	16.2345	15.4781	15.5001	15.1599	15.0826	15.5691	15.6398	14.9729	15.2109	16.01	15.1209	13.9539	16.3325	15.1347	15.0741	16.0308	14.9419	14.8093	14.8643	15.0767	15.5341	15.1654	14.9234	15.6208
CHIC2	ENSG00000109220.9	mRNA	19.095	18.5502	22.6541	18.3531	18.1401	17.9262	17.6762	18.1937	18.674	18.2978	17.6273	19.0819	17.7716	17.5178	17.3477	18.1753	18.5093	17.6422	18.0212	17.7683	18.3056	18.8303	18.8398	20.3071	17.6049	18.5553	18.2179	17.6178	19.3648	18.2966	17.9899	17.9919	18.0336	17.8383	17.8138	18.2776	17.3578	19.0336	17.2289	20.2362	17.0865	17.8333	17.8462	18.1082	18.1129	17.6296	17.9344
CHID1	ENSG00000177830.16	mRNA	18.9555	18.0301	18.246	18.4047	18.7183	18.6899	18.481	19.3465	18.5805	18.5381	18.0676	17.7973	18.1813	18.4998	17.7437	18.0773	17.8965	17.5702	18.3644	19.2423	18.6176	17.3926	18.4129	18.8001	18.9131	19.6669	18.8146	18.671	18.7801	18.624	18.8745	19.5106	18.4277	18.2959	18.3134	18.9851	17.4198	18.3671	18.3657	17.6844	18.5717	18.726	18.8506	18.5562	18.4438	18.0955	18.6256
CHMP4C	ENSG00000164695.4	mRNA	13.3142	11.0939	9.49382	12.613	13.6317	13.6174	11.7632	12.7413	9.01153	12.0635	14.121	10.9838	11.7199	11.6034	10.8295	10.8614	13.1384	11.8931	12.261	10.9232	11.2833	11.4547	9.70244	12.1112	10.1273	11.0562	11.3919	13.1963	14.1825	10.9033	11.2494	11.8859	8.73124	10.2575	13.4444	11.6403	11.3973	11.6924	12.6231	11.9893	9.40712	11.5556	9.27906	13.3355	11.5747	10.592	10.1995
CHRD	ENSG00000090539.14	mRNA	16.4908	13.9834	15.4936	13.371	15.2892	16.0064	15.2834	15.8636	17.9628	16.6339	15.9695	15.672	16.2525	16.4733	15.7388	15.8638	16.0105	16.1744	16.0087	14.3577	14.7726	13.9493	15.3251	15.8172	15.9668	14.8236	15.237	15.8644	15.9335	14.5867	15.7053	16.0321	16.1274	16.5527	15.6635	16.2768	15.1756	15.6706	14.3121	14.7842	15.485	13.5074	15.5809	14.9106	15.2472	16.6345	15.9291
CHRNB1	ENSG00000170175.9	mRNA	15.5089	15.4701	17.2945	15.523	16.8502	16.8897	16.7029	16.7958	17.6116	16.4784	17.3489	15.7377	17.7584	16.2022	16.8604	16.5332	17.5754	15.6387	16.4245	16.9203	16.1861	16.2098	17.0772	16.1794	16.5437	16.5626	17.061	16.372	16.9143	16.2492	17.4795	17.0508	16.6197	16.6372	16.1638	15.8341	17.6006	17.2489	14.9548	16.3896	16.1653	17.4159	16.5343	16.8492	16.004	15.9576	17.4054
CHST1	ENSG00000175264.6	mRNA	17.8375	16.7449	17.4944	16.0818	18.1615	19.3748	17.3836	18.1747	18.7141	16.4293	18.4078	16.876	18.1945	16.1866	17.3322	16.4272	17.5201	17.1068	18.8296	17.1637	16.0769	15.8038	18.0768	16.9447	14.5853	15.7169	16.7426	16.659	15.8971	15.5589	15.9718	17.8503	15.0632	17.7395	17.6867	17.3622	16.9692	18.032	12.9636	16.3457	17.933	16.7269	15.639	16.0191	17.333	17.46	15.9667
CHST13	ENSG00000180767.8	mRNA	12.4876	11.9199	12.7227	14.8499	11.8992	14.7936	13.6888	12.1142	12.8771	11.7093	10.5198	12.688	12.681	8.96618	12.0418	11.7519	12.095	11.9539	12.3218	13.1533	10.8589	14.7881	7.76813	10.4723	12.4094	12.4385	11.4527	11.2069	9.57271	10.9641	11.8405	13.0053	14.9785	9.31934	11.8616	13.0793	10.0804	13.033	11.7407	10.6356	11.0514	11.8573	11.2126	11.3263	12.1379	11.167	11.2596
CHURC1	ENSG00000258289.6	mRNA	17.7572	17.8878	18.4392	17.6073	18.5816	17.9961	18.0448	17.1946	18.0903	17.6877	18.7889	17.5478	18.7108	18.9061	18.488	18.334	18.3946	17.9553	17.984	18.6398	17.2359	17.3352	18.3981	17.7429	17.2213	17.5448	18.493	18.5058	19.043	19.2763	17.3449	17.2238	17.1775	17.7725	18.2336	19.1333	17.2702	17.347	17.1695	18.413	17.9983	17.6961	18.3398	18.6521	17.9748	18.3627	18.5184
CITED4	ENSG00000179862.6	mRNA	16.3157	15.003	14.4982	15.6919	15.9268	15.9956	16.194	17.0874	16.784	15.3871	16.4429	17.2012	14.9164	14.9455	15.3123	14.4424	15.6336	15.5463	15.8306	16.693	15.4386	14.0735	15.9392	15.4993	16.3394	14.8073	15.7365	14.9081	13.4734	15.172	16.638	16.5458	14.4605	14.9953	15.0591	16.6118	15.3087	14.2213	14.3409	15.151	15.2126	14.0914	16.1085	15.7597	17.162	16.1204	14.1616
CLCF1	ENSG00000175505.10	mRNA	19.3469	15.213	15.8964	18.6141	18.1019	16.9046	17.1239	17.8714	17.2689	16.5435	17.495	16.0861	19.1401	15.0203	16.0807	16.4193	17.6272	14.7297	15.6919	18.7094	14.7858	14.4878	14.8283	14.2828	14.3661	14.2956	16.7132	17.7915	16.829	16.5756	16.6372	18.9851	16.189	16.5494	17.6224	17.4471	13.1996	17.7066	16.397	17.1141	13.5327	17.5626	15.4043	15.5616	16.9681	15.6266	14.0613
CLDN23	ENSG00000253958.1	mRNA	16.3592	12.6419	12.6442	16.4313	15.8638	14.9028	15.7663	16.785	13.921	12.5467	16.4274	12.4667	15.9879	13.4135	13.9336	12.8313	14.6345	12.3763	13.0438	16.1525	11.9591	11.6526	14.3039	12.2812	14.4737	13.954	14.3443	14.876	13.9077	14.8394	13.8392	16.223	16.1832	14.6831	13.1684	15.8424	11.3867	12.8771	11.222	14.2314	11.3584	14.5791	12.3818	14.4125	14.8057	11.9593	12.7469
CLDN7	ENSG00000181885.17	mRNA	15.462	12.9688	13.1335	14.5403	16.0176	13.4225	13.9476	14.6655	14.5572	14.0382	13.8133	13.2938	14.1502	13.1	13.9419	13.631	13.7704	14.3943	13.6508	14.9314	12.3802	12.9115	12.8071	13.1632	13.4457	14.6231	11.7114	14.0501	13.5191	14.3333	13.088	14.778	13.2175	13.6803	13.875	15.2757	11.9798	14.082	12.147	13.7416	12.6317	13.6327	12.404	12.8478	14.8199	13.2491	13.1596
CLEC2B	ENSG00000110852.4	mRNA	18.4332	16.2055	15.8912	17.7209	17.5441	16.1622	15.8781	16.9573	16.2269	15.7485	15.2501	15.4893	16.2673	15.403	15.0541	14.699	14.9199	14.5328	15.2423	18.4002	14.8339	14.2278	16.7692	14.3373	14.1913	16.7426	15.6601	18.4744	17.2632	17.7554	14.3868	17.3207	17.2284	15.2804	16.7018	18.0608	13.8263	15.2739	16.353	16.241	15.5129	17.5721	14.1924	16.1578	16.3447	15.4289	15.1648
CLIC3	ENSG00000169583.12	mRNA	15.2289	12.6843	12.2724	15.5645	12.9181	14.3977	13.2054	13.5023	13.1332	13.1204	13.396	10.2341	11.6478	11.5678	12.1313	10.9412	13.8363	12.3652	12.5887	12.1726	11.4626	11.5345	11.5359	13.9334	12.9065	12.5951	12.0565	14.251	13.8754	12.4157	13.2674	11.5508	14.6781	12.3364	12.2729	12.568	10.684	14.0413	12.4515	12.3545	11.6552	13.5156	11.527	13.1929	13.5122	13.4029	10.1274
CLIP2	ENSG00000106665.14	mRNA	17.7999	18.7542	20.367	19.0323	18.4835	19.6015	18.4557	19.5329	19.7947	20.423	19.2283	20.1618	19.7809	20.364	20.8171	19.1355	19.2437	19.5694	19.3381	19.155	18.871	19.3634	19.1305	19.5424	21.4657	19.8572	21.0032	19.272	17.3838	18.9252	21.1788	18.5476	20.1391	21.1158	19.9113	18.5012	20.6891	19.4225	19.5469	19.9076	20.1915	19.815	20.6478	19.3241	19.4108	19.8264	21.8668
CLIP3	ENSG00000105270.13	mRNA	19.3008	20.7808	21.0934	18.4927	19.5963	20.982	19.8216	18.9671	20.4354	20.6981	20.2883	19.8877	19.9205	20.5292	20.0409	20.539	20.289	20.5256	20.7058	19.5162	20.1968	21.3143	20.4747	21.371	20.515	20.3761	20.1799	20.6609	19.4072	19.1795	20.4977	19.8578	19.7914	20.5763	21.0527	18.9894	20.9889	20.4967	20.554	20.4901	20.4191	19.8386	21.3175	21.2122	19.5567	21.7739	19.9644
CLMP	ENSG00000166250.10	mRNA	18.4358	15.75	15.4823	17.3513	14.7622	14.7526	13.0909	17.8733	12.49	13.023	12.4236	13.4878	12.855	12.2604	13.8239	12.2856	11.9905	11.3505	13.773	14.4784	14.3203	12.1203	13.1819	15.6332	14.7496	11.0216	14.4282	15.3883	14.2892	12.6858	10.9518	17.5847	14.0398	11.807	13.305	15.0907	12.6392	13.533	13.5295	13.0313	12.3131	14.193	9.24445	15.0933	13.5397	13.9707	12.1818
CLTCL1	ENSG00000070371.14	mRNA	15.1513	14.3367	14.4947	14.4256	13.8196	14.0952	13.7554	13.8162	14.9849	15.4968	13.1788	13.5486	14.1048	13.8311	13.6686	13.6498	14.4851	14.2871	13.3709	12.9612	14.8079	13.7257	14.7291	14.4572	12.9948	12.6417	13.8613	13.5386	13.8158	13.5005	13.8348	13.7785	15.5515	14.476	13.7638	14.0854	13.4963	13.9314	14.405	14.3801	13.6485	14.7301	14.0507	14.1102	14.0239	13.4155	14.3751
CLU	ENSG00000120885.18	mRNA	24.1733	22.1184	24.8291	23.2838	25.4587	25.5343	25.4379	24.7731	25.3245	23.7333	25.5831	24.5698	24.3886	24.1155	24.8737	23.7869	24.526	22.5303	23.9049	25.1414	23.6668	23.7966	27.0741	24.3486	24.5299	24.6298	24.1901	24.9133	24.9509	25.7276	24.2138	25.7762	24.1316	24.9469	26.1536	24.4585	24.4256	24.2828	25.4425	25.4509	24.4784	25.6964	23.9398	24.72	24.1707	23.6561	22.6359
CMBL	ENSG00000164237.7	mRNA	16.3749	17.1647	16.9334	17.168	18.7041	18.1122	17.9898	17.7798	17.3179	16.9184	18.3364	17.0175	18.1332	17.8607	18.0808	17.6192	17.4863	17.1379	18.0655	18.265	17.7259	17.3031	17.8292	17.9151	17.9935	19.4222	17.9414	17.2783	18.6813	19.2234	17.9315	18.9265	17.4475	18.0026	17.4553	17.7042	16.0433	17.5475	13.8466	17.6618	17.6327	18.0547	17.6361	18.5268	17.4883	17.1735	18.0609
CMTM3	ENSG00000140931.18	mRNA	20.0611	18.9277	18.5314	19.78	19.2025	19.0441	19.3647	20.0847	19.5492	19.8709	19.2525	18.9887	19.7406	19.1896	19.5121	19.0105	19.3413	18.6485	18.4117	19.7854	18.7433	18.3149	18.1956	18.5493	19.547	19.1986	19.6919	19.3119	19.242	19.1774	19.5983	19.5053	19.2415	18.7484	19.6761	19.2777	18.5233	19.1359	18.812	19.6274	19.643	19.7578	19.7396	19.389	19.2034	18.6283	18.8844
CMTM4	ENSG00000183723.11	mRNA	16.6858	16.1699	17.1268	15.251	16.8262	16.917	15.2629	15.7678	17.7627	16.6853	17.6442	16.2372	16.8008	16.3599	17.4039	17.2766	16.9291	16.2904	17.0719	16.1256	16.0857	17.1124	17.1666	16.3202	16.1666	15.2774	16.5333	16.8538	15.686	16.4211	16.8367	15.4275	16.5435	17.1025	18.1758	16.0277	18.6026	16.5351	16.6557	17.2994	17.0792	16.8627	16.4365	16.9055	15.7075	18.2197	15.7956
CNEP1R1	ENSG00000205423.10	mRNA	17.1328	16.8973	16.6082	17.0118	17.7144	16.3852	16.8814	17.0646	16.8232	16.9717	16.8239	17.1011	17.1275	16.8057	17.0077	16.9488	16.8722	16.7756	17.2728	17.218	17.3623	17.2339	16.3077	16.9359	16.874	16.9095	17.2546	16.6988	18.3874	17.5612	16.8556	16.6846	16.3464	16.8259	16.9253	17.7065	16.6473	16.6817	16.8755	16.0905	16.9769	16.8871	17.0969	17.1255	17.1037	16.6038	16.4226
CNIH2	ENSG00000174871.9	mRNA	16.335	19.0396	18.4417	17.6841	17.8959	19.9029	16.9889	17.4433	18.6623	18.4991	18.8267	18.7328	18.938	18.0062	18.2275	17.3762	19.4759	17.8973	20.6187	17.6454	18.3348	17.1715	19.0142	19.4795	17.7185	19.7262	18.9578	16.5201	17.6694	18.1647	19.8628	18.8769	19.4835	18.5985	17.1231	16.598	18.7415	18.5827	17.3458	17.1709	16.9249	20.4715	19.3501	18.2524	19.2481	19.1719	17.8998
CNR1	ENSG00000118432.12	mRNA	17.1265	16.9859	17.8719	15.8408	15.6263	17.3698	18.409	15.3862	15.5441	17.0421	17.6467	19.6365	18.0336	18.9747	18.1775	15.4101	17.5928	18.2693	18.0606	17.8601	17.2008	16.6086	18.0234	18.9144	17.53	17.211	17.4575	18.2306	17.9234	17.2067	15.4501	16.9277	17.2735	20.1512	17.6254	20.7498	16.5808	17.6607	18.3579	18.8716	17.982	18.0334	17.5055	16.0043	17.8571	18.262	18.2857
CNTNAP1	ENSG00000108797.10	mRNA	16.3645	16.8949	17.0344	16.2156	16.8023	18.5338	17.7505	17.592	17.7719	17.253	17.6003	18.3923	17.9525	17.4445	18.7521	17.1067	18.976	17.6105	17.9569	17.3075	16.3303	16.7696	17.8841	16.3676	16.9835	16.7188	17.953	18.7371	16.4972	17.8	17.7856	17.8645	17.3602	18.4362	17.9918	17.2152	17.0754	17.5141	17.8019	18.2564	18.0624	18.1418	16.9378	16.9503	17.331	18.1869	17.1289
COBL	ENSG00000106078.16	mRNA	14.7151	15.0473	17.54	13.6043	15.8731	16.9674	16.3401	15.7642	16.4611	18.0045	18.2113	16.2986	17.2509	16.7528	17.8141	16.7441	16.4731	17.056	17.3852	14.8201	17.5707	13.9082	17.0082	16.5826	14.2609	16.4592	18.0368	16.3785	16.0952	17.5715	17.844	14.8338	17.0207	17.0003	17.0962	15.9943	17.8539	16.8501	16.3501	17.3088	15.1757	16.9723	16.1376	17.7448	17.2506	17.7318	18.6133
COL11A1	ENSG00000060718.17	mRNA	18.7019	16.4555	14.842	12.4514	16.7563	16.1141	12.438	17.1991	13.313	14.256	16.6055	15.2832	13.3522	12.6505	12.7787	14.0395	12.7745	18.6793	14.3898	13.0329	17.7414	17.3071	15.7223	16.3146	11.5237	11.4533	13.2294	13.1101	15.0354	12.5213	15.1068	17.7104	12.2676	17.0784	15.3779	14.5285	17.2222	15.3886	16.3692	17.3272	13.0655	15.0362	11.3002	17.0349	17.019	11.807	13.1888
COL15A1	ENSG00000204291.9	mRNA	15.9483	14.8739	12.6729	17.4341	15.8148	15.1172	14.9825	18.2911	14.0327	14.9051	14.1938	15.5627	14.6686	13.9203	12.2513	15.576	14.529	13.3162	14.482	15.6392	15.5721	11.736	11.359	13.2204	10.7952	12.6811	13.7669	14.2921	13.8053	14.8604	12.9592	16.4537	15.4465	13.0074	13.3759	14.4497	12.5768	13.106	15.4165	15.0528	13.1561	11.9345	14.6875	17.381	13.6148	14.9298	12.7149
COL27A1	ENSG00000196739.13	mRNA	14.8585	14.4872	13.2535	17.538	14.2296	13.1924	15.5631	14.7419	14.1139	14.0427	14.3398	15.9162	16.2998	16.6321	15.0598	15.1498	14.5724	13.6233	14.3107	14.4799	13.6408	12.0509	12.9445	12.1911	16.2993	11.2929	13.7269	14.5008	13.0303	12.8244	15.2307	14.7365	11.4369	15.5989	14.2252	15.5411	12.7446	14.8853	13.192	15.8293	16.1508	13.3394	15.3706	13.659	13.4926	13.8492	14.2276
COL3A1	ENSG00000168542.11	mRNA	24.0261	19.6452	18.0755	23.8237	21.7155	20.0405	19.3182	23.202	18.8873	18.4336	18.6011	18.2646	20.5943	20.1767	18.6265	18.9221	18.4165	18.9938	19.1297	20.4302	19.4882	17.7579	15.9864	17.3794	17.6504	18.4861	20.1796	19.9647	18.7772	18.7599	18.7083	22.1585	18.8239	20.1828	18.1875	20.8395	16.3811	19.4799	19.4446	20.1407	18.2999	18.4105	18.86	22.1567	18.8378	18.6443	19.4113
COL5A1	ENSG00000130635.14	mRNA	20.1345	16.7867	14.2886	19.0177	18.0221	16.9461	15.5237	20.8432	16.3376	15.0584	16.5184	17.4304	18.6884	16.1702	16.0106	16.7848	15.668	15.26	15.5542	16.903	15.365	14.4451	13.0884	14.7894	13.7644	14.4488	17.9228	17.9306	17.0101	15.7229	15.4211	19.9199	15.9455	17.1731	17.3655	17.6666	14.9373	16.3173	15.0097	18.4333	15.3601	15.1374	16.3763	17.36	16.6226	15.9711	16.6814
COL5A2	ENSG00000204262.10	mRNA	20.6985	17.5562	17.6559	21.17	18.178	17.7779	18.7408	20.8847	18.1413	17.865	16.972	19.1782	19.1595	18.0196	18.6913	18.8998	17.6676	17.3512	17.0103	19.1715	18.4222	18.9806	17.2762	16.9929	19.0367	18.1345	17.008	18.8424	17.2065	17.0604	16.8676	19.8563	17.9037	18.6595	17.6589	18.8575	18.8172	19.0764	18.7312	19.1573	19.2294	17.6727	18.2331	18.8319	18.0596	17.3121	18.2283
COL7A1	ENSG00000114270.14	mRNA	16.6619	13.4973	15.2345	16.9183	16.2196	13.3944	14.5057	18.76	15.447	16.0633	14.1052	15.883	16.4386	13.7432	14.2675	14.9066	14.1629	15.4571	13.9399	13.8655	12.5933	13.7435	11.1099	12.7123	12.3988	11.1119	13.4857	14.2653	13.1798	12.0783	14.5463	17.185	14.5812	14.7821	15.6389	14.4543	13.3176	14.5567	14.1451	16.5241	14.4325	13.2686	13.8442	14.1849	14.3184	14.3974	12.5932
COL9A3	ENSG00000092758.14	mRNA	14.4047	18.9501	16.0967	13.9453	16.5086	16.3038	16.0384	18.1065	16.3053	20.0056	18.988	17.9157	18.1016	17.3535	17.3335	18.7902	15.4663	16.6223	17.2035	14.6323	19.092	15.0361	13.7463	17.6856	19.32	18.4065	18.1742	16.0211	16.9769	14.7858	21.3653	15.9394	14.7901	16.5338	18.1154	16.5455	15.8058	15.2127	17.062	17.1234	15.8464	13.7569	19.8308	18.1858	16.6991	18.3107	18.1048
COMMD8	ENSG00000169019.10	mRNA	18.2978	17.4728	16.6658	18.5037	18.675	17.4955	18.0179	17.7258	17.4369	17.8079	18.0239	17.289	17.4097	17.7957	17.6436	17.2068	17.602	16.8051	18.4223	18.1312	19.2827	18.1919	17.8637	17.2647	17.1083	18.9391	17.6948	16.7575	19.3936	18.5228	17.1945	17.5919	17.0216	17.0682	17.1087	18.5085	16.7588	17.4049	17.3737	17.0935	17.1745	18.0578	17.577	17.8153	17.5785	17.0406	17.1555
COMP	ENSG00000105664.9	mRNA	19.8564	8.62712	9.49799	8.24089	9.78494	11.3001	9.54655	11.8512	10.0846	9.33259	9.14278	7.25979	8.66833	8.75801	8.92893	9.28212	8.98202	8.16496	6.95461	10.3607	7.74929	9.139	8.9708	10.8484	7.81466	8.74116	10.534	0	10.3633	12.0182	7.35493	12.0275	13.0613	7.94441	9.65437	10.0016	13.9179	9.47574	8.83439	10.9573	8.67575	9.68661	9.28323	10.2114	7.2659	9.37501	8.14864
COPE	ENSG00000105669.11	mRNA	20.3063	20.363	20.955	19.8513	20.2919	20.753	20.9414	20.4208	21.1236	21.1723	20.2297	19.664	19.8495	20.5744	19.5466	20.1175	19.8593	19.974	20.4854	20.4458	21.0252	19.8917	20.0802	21.2456	20.6292	21.3644	20.8211	20.1506	21.0984	20.783	20.4845	19.8768	21.4814	20.1422	20.753	19.9711	19.3082	20.2372	20.4481	19.8297	19.9507	19.9449	20.3429	20.558	20.4222	20.3715	20.1966
COPZ2	ENSG00000005243.8	mRNA	19.2455	15.9276	15.7577	19.0753	19.588	18.0608	18.1995	19.2496	19.0716	18.3286	17.692	15.6743	18.646	17.8434	17.5908	17.3389	18.9916	15.6593	17.4288	19.0156	15.6266	15.5813	17.0874	16.7928	16.5861	18.9959	17.6541	17.3942	18.8582	19.2144	16.5864	19.6697	18.1047	17.3501	18.3531	19.3376	15.4495	18.7068	14.5757	18.0947	18.7841	17.402	17.0785	18.2273	18.1418	15.263	18.2554
CORIN	ENSG00000145244.10	mRNA	14.2589	9.42637	9.6441	11.3929	10.4976	9.59971	10.6094	10.807	10.3827	8.80182	10.527	10.2503	9.9032	8.64156	10.0836	10.0125	8.60311	10.4593	9.82779	11.161	10.5013	10.0211	9.79142	9.14848	9.91539	9.49752	9.28115	10.1529	10.0769	9.60747	9.6462	11.3901	8.10596	10.0961	9.95234	9.7596	9.78709	10.1518	9.93836	10.3629	10.4951	10.6621	7.84853	11.0328	10.0156	9.25846	9.53126
CORO6	ENSG00000167549.17	mRNA	15.3403	12.2606	12.4506	14.2574	14.5011	12.728	13.1536	11.842	14.0735	14.1556	13.8012	14.3187	14.3826	13.9006	13.5349	12.6693	14.3144	14.3538	14.7953	12.4926	11.8493	12.658	12.8645	12.8431	12.2841	10.8449	10.9177	11.5866	13.7581	10.3703	13.1714	11.6131	13.7162	13.1183	14.6334	13.8436	12.5727	14.2879	10.4691	13.6965	12.8942	11.5852	12.1245	11.5394	11.3634	13.2306	10.9875
CPA6	ENSG00000165078.10	mRNA	14.03	8.999	11.4542	11.6967	11.1566	0	13.268	13.1956	12.5069	10.7039	11.4204	8.62671	15.4582	12.4007	10.6215	10.5015	10.5228	7.5404	8.32016	16.6683	9.70197	11.0948	9.66433	9.63718	12.1813	9.6972	10.9065	11.1486	10.7358	10.5435	9.72051	13.4	11.4557	10.1199	10.0267	9.69658	8.92423	10.5255	10.7897	12.273	11.5048	10.3217	9.65541	8.58668	11.5366	7.43199	10.9764
CPD	ENSG00000108582.10	mRNA	18.2406	16.7211	17.04	18.1561	17.3588	17.8034	16.4956	18.7055	16.4773	16.364	16.747	17.2513	17.51	17.2758	17.664	17.3511	18.0893	16.6198	16.541	19.4671	16.5519	16.7637	17.1377	16.352	16.7913	17.1078	17.4618	18.4541	16.6328	19.1763	16.39	20.3006	17.3827	16.9423	17.694	17.1095	17.1146	17.0371	16.0652	18.0661	16.6525	17.335	16.5889	16.9862	17.1335	16.6623	17.0661
CPM	ENSG00000135678.10	mRNA	17.5104	17.4936	16.0631	17.7026	18.7949	16.9553	18.9358	16.7368	15.3103	14.8144	17.0676	17.1218	15.4925	16.7822	17.5289	15.1888	17.324	16.8677	17.859	17.5124	15.6191	15.9641	17.9159	17.6671	16.407	18.4249	16.3796	16.9244	16.0757	15.8078	15.353	18.4552	16.8396	15.9385	17.2995	17.3188	14.8676	18.592	16.2669	17.2208	17.4068	17.1649	17.457	16.792	16.3528	16.3111	16.3862
CPNE8	ENSG00000139117.12	mRNA	15.5087	13.5657	16.565	16.1001	16.3641	15.9522	13.983	14.7988	15.3974	16.3389	14.7626	13.9784	14.779	16.9721	14.123	15.5867	14.0851	13.5701	15.4654	14.5053	13.9572	13.5668	13.2945	13.5231	13.2782	17.0829	17.9194	14.8601	17.0418	14.3562	16.1281	14.7997	15.8423	17.3813	17.0074	17.0525	14.7318	13.3665	12.7547	13.6041	13.2365	14.629	17.2045	13.8544	16.5937	16.2914	14.2557
CPS1	ENSG00000021826.13	mRNA	13.5027	15.0924	14.3352	10.2403	13.491	15.155	12.6106	12.4968	14.028	15.0173	14.9639	11.9746	14.4701	12.8018	12.6979	15.7929	15.7723	14.4081	13.8812	12.5776	15.6667	17.2945	13.5999	13.3438	11.5487	13.6934	11.2531	15.6017	13.6837	12.7686	15.2145	13.1014	16.1027	15.9787	16.2136	13.094	12.4881	16.3329	15.7208	15.2625	12.5644	12.8874	12.0529	15.8741	11.5712	16.3645	11.5419
CPZ	ENSG00000109625.17	mRNA	13.1735	6.89804	12.7496	12.0838	10.0471	9.14947	10.3931	13.6561	9.44734	9.76436	7.99329	10.6836	8.51612	11.41	0	9.61446	12.7337	9.33148	8.79358	9.62384	7.59743	0	8.81851	8.529	10.464	9.58706	11.0916	11.8454	11.7125	11.7831	9.19595	11.8078	11.091	11.4869	11.2375	11.4331	7.81739	9.002	7.10418	10.1049	7.52745	9.79691	9.39349	12.9404	9.42791	6.91034	7.00223
CREG2	ENSG00000175874.8	mRNA	15.0523	13.1463	14.391	13.5546	14.1731	15.9336	12.888	12.9897	11.7716	14.2127	16.0251	14.4332	15.6674	15.5626	14.2365	11.7073	14.0687	14.4466	17.8001	15.2974	12.9126	11.2538	10.7178	14.506	11.304	10.2342	13.9074	13.9927	14.9815	13.5008	13.516	13.0065	9.96122	13.0189	14.5904	14.8118	16.1126	11.6749	8.62967	11.8327	9.27669	11.6817	12.7652	13.5597	13.1495	16.7029	12.9497
CRHBP	ENSG00000145708.9	mRNA	12.9772	11.5771	13.178	13.3128	13.8199	15.4897	14.6631	13.563	12.28	14.4762	15.269	12.3964	13.0331	14.1229	13.5637	11.8589	13.1912	13.4556	16.2982	15.6347	13.3803	13.3698	10.9218	15.1722	8.9569	10.6918	12.6459	11.5589	14.093	12.3862	12.2995	11.8838	12.1855	12.1721	15.3009	12.3942	14.6563	12.5832	11.48	11.6503	10.6262	12.1529	11.9631	11.2635	8.40651	17.2762	12.6818
CRIP1	ENSG00000213145.8	mRNA	12.9009	12.4457	13.1941	15.1704	13.0726	13.0786	12.5424	14.6597	13.8623	13.6272	13.5042	11.9625	12.9844	12.6187	11.7053	12.9214	15.3266	12.3866	12.8172	12.5538	13.2321	11.4564	11.6098	13.1673	11.2982	12.3795	12.0373	12.1731	12.4893	12.7525	13.3662	13.6687	14.4542	12.0133	12.4748	13.9491	10.9842	12.8977	11.4732	12.7458	12.2399	12.4376	12.6006	13.2303	14.5873	11.9557	12.3702
CRLF1	ENSG00000006016.9	mRNA	17.4594	15.0261	18.6546	13.3415	15.0189	19.2305	16.9949	13.9311	16.0155	14.4139	17.0497	13.4595	15.2534	13.9369	13.3228	14.9801	13.8128	14.4279	17.1964	14.2062	13.9913	14.9305	14.9019	17.0388	13.1695	18.5091	13.1353	13.7321	16.5679	13.4721	14.1797	16.673	14.5019	14.1676	18.1039	13.8468	17.775	13.7146	14.3835	13.9819	16.2192	13.5721	12.5833	16.2352	14.9323	14.7412	12.6748
CRMP1	ENSG00000072832.13	mRNA	17.2026	20.7834	20.1193	18.2268	18.4764	19.7034	18.3077	18.1546	19.4751	19.9251	19.3582	19.9774	19.4996	18.6083	19.4732	19.4327	18.871	20.2972	20.6554	17.5351	20.2913	19.8717	19.2184	21.2398	17.5295	19.2011	19.8071	18.1675	18.4371	17.7733	19.9997	18.3008	19.2038	20.2721	19.0305	18.5447	20.5333	20.1729	20.3493	19.2198	19.1246	20.1775	20.2635	19.2488	18.8555	20.2269	19.7503
CRTC3	ENSG00000140577.14	mRNA	16.6867	16.7876	16.5753	16.5386	16.4536	17.1029	16.6061	16.4264	17.1028	17.1838	16.6351	17.4647	17.3652	17.0515	17.3446	17.2528	16.6164	17.3666	16.5028	16.5399	16.1609	16.8618	17.4437	16.7689	17.5788	17.1341	17.0101	16.9813	16.3206	16.6261	16.8495	16.7401	17.0227	17.2427	17.051	16.8626	16.8264	16.8786	17.1528	17.4057	17.4784	16.2837	17.7028	17.4162	17.1374	17.5147	17.6395
CRYGS	ENSG00000213139.6	mRNA	14.2746	14.1513	14.5845	15.2315	18.3223	13.7343	15.6693	14.7867	18.8058	16.301	14.5628	15.27	15.5963	16.1195	15.1472	15.1438	16.8754	15.3601	14.7091	15.2093	15.5923	14.0566	14.9795	14.314	14.5258	13.0206	12.9591	13.625	18.6865	15.7935	15.5881	14.5385	14.1376	14.5644	15.0548	16.4408	14.8837	15.5499	14.7282	15.3764	16.4621	14.7734	13.1873	14.5194	14.2272	14.6231	14.3295
CSAG1	ENSG00000198930.11	mRNA	12.3373	15.5777	14.6106	12.3271	15.2119	14.6127	15.5358	13.3567	14.4542	15.9129	14.2608	14.0041	15.2861	14.376	14.858	14.7675	14.2924	15.4339	15.6086	15.4369	14.2026	14.8122	12.9974	14.8559	14.4015	14.5655	14.1644	13.7551	13.19	15.0541	15.0016	13.8285	13.5453	14.8367	14.4803	14.8459	11.9291	14.8864	13.396	14.9117	15.8362	14.4233	15.1513	13.9255	11.7627	14.8786	14.7154
CSF1R	ENSG00000182578.12	mRNA	20.1529	19.4392	18.0071	20.8922	20.3355	20.5468	21.0419	20.0068	19.0706	18.5615	20.4101	18.7703	19.3517	18.5829	19.2947	18.6124	20.3575	20.3394	19.2255	21.1284	17.0245	18.2435	20.4279	19.6724	18.9656	20.7822	19.2525	20.5058	18.0785	19.9859	18.213	20.1622	19.7827	18.3578	19.3192	19.9371	17.8065	18.6425	18.4338	19.5856	16.7083	20.5652	18.4898	18.0541	19.641	18.6508	19.2729
CSF2RA	ENSG00000198223.13	mRNA	17.3664	16.3338	16.0039	18.3729	18.3346	16.5418	18.8921	16.3595	16.282	16.2156	17.4912	16.4356	16.0208	16.4312	16.9489	15.9684	17.2137	16.8567	17.1029	18.0111	14.0963	15.7267	17.5672	17.5355	15.8917	17.928	15.9761	16.3722	16.4471	17.0291	15.0015	16.0313	16.717	16.0769	16.8452	16.9388	15.5868	16.0567	14.7165	16.3715	13.9824	16.7254	15.1056	15.3235	16.1998	15.8679	16.3527
CSGALNACT1	ENSG00000147408.13	mRNA	17.0363	16.8787	16.9805	17.1458	16.7916	16.9923	17.4181	16.8546	16.0824	15.5465	16.7896	16.8339	15.6775	15.6447	17.3933	16.2487	16.8654	16.6001	17.4486	16.3113	17.0592	15.7926	17.4703	17.2398	15.5994	17.4354	16.8259	15.8732	15.9773	15.8658	16.5158	16.0823	16.0182	17.062	17.1193	15.4147	16.0369	15.9703	17.193	16.5813	15.5699	16.7101	17.6745	16.199	15.1655	16.204	16.6012
CSGALNACT2	ENSG00000169826.7	mRNA	18.3533	17.9007	16.7214	17.8811	17.7953	16.4761	16.8435	17.3454	16.3802	16.5875	16.4032	17.4289	17.1034	16.8026	16.8653	17.0368	17.1157	17.5562	16.7613	16.9866	18.1748	17.6249	16.8423	16.7928	16.496	16.4343	16.2081	17.309	16.6957	17.2905	16.7072	17.7951	18.3975	16.5285	17.2729	17.7897	16.7402	17.6798	16.8822	17.1869	16.0853	16.3703	17.0413	16.4175	17.6844	16.8546	16.4046
CSMD1	ENSG00000183117.16	mRNA	10.4806	12.8211	15.4899	8.10817	12.7301	12.6379	12.4117	8.36946	13.1306	12.7152	12.4487	14.2296	12.8048	12.4039	14.4222	13.418	13.5237	15.2424	13.8362	11.8735	14.595	13.3513	12.8833	14.4558	11.147	11.9784	12.6955	11.9673	12.8783	11.7314	14.0039	9.93078	13.7402	14.537	14.263	12.4247	15.2251	12.9645	14.9333	12.878	12.9806	11.8151	14.5698	11.4125	10.5475	13.3832	12.5956
CSPG4	ENSG00000173546.7	mRNA	16.7476	18.7135	18.3977	18.1794	16.7119	18.3728	17.4551	18.7144	17.7612	19.2151	17.8621	18.8677	18.7676	18.1231	19.1808	19.3649	16.6847	18.4365	17.4832	17.7073	18.7549	17.2157	16.7298	18.7005	20.3932	19.7199	19.2726	18.1895	16.8475	16.8545	20.3062	17.8504	17.804	20.0957	17.7338	18.0997	20.2812	18.5483	18.9603	18.4267	17.7227	16.6185	18.5865	19.1705	17.3065	18.9466	20.5904
CTNND1	ENSG00000198561.11	mRNA	18.4203	18.7331	19.2576	19.3533	18.3582	18.7179	18.6353	19.0725	19.0998	18.9289	19.2916	19.4268	19.2099	19.3411	19.6821	19.5751	19.1565	19.2592	18.2371	18.8568	18.7503	19.3538	19.2042	18.3236	19.3005	18.5882	18.9732	19.5647	18.163	18.2955	19.19	19.0987	18.4879	19.4373	19.1793	18.9915	18.8222	18.7515	18.2219	18.9502	19.2352	18.8936	19.2131	19.3828	18.9678	19.4382	19.2728
CTNND2	ENSG00000169862.17	mRNA	16.6062	19.0081	19.8222	16.2296	19.048	20.1098	18.7062	18.3284	20.8522	19.8076	20.3167	19.4748	18.5493	19.3413	19.8613	19.9924	20.1913	19.6395	19.7048	18.7518	19.4361	21.0843	20.3352	19.8963	19.7667	20.1739	19.5882	19.6348	18.8385	18.9194	20.0768	18.1652	18.5777	20.317	20.105	18.2864	20.3486	19.5341	19.0142	20.7569	20.0245	19.9136	20.0162	19.5673	19.828	20.7126	19.9156
CTPS2	ENSG00000047230.13	mRNA	16.6113	16.6635	17.277	16.0178	16.1139	16.8056	16.4323	16.1348	16.3062	17.2187	16.7549	17.1759	16.7099	16.8541	17.2926	17.0907	16.8346	17.1948	16.2365	16.3448	16.5426	17.3972	17.2871	16.9969	17.3232	18.0859	16.9361	16.749	17.0538	17.611	17.3631	15.73	16.9389	17.2171	16.9915	16.3002	17.4819	16.9159	16.838	17.27	16.8995	16.349	17.0897	17.0373	17.0308	16.8391	17.1159
CTSZ	ENSG00000101160.12	mRNA	22.4301	20.2424	18.9645	22.3164	22.2658	21.3039	21.2928	22.7493	19.9583	19.4056	21.4316	18.9454	21.0075	19.507	20.3284	19.1978	20.7803	20.303	20.3599	21.8057	19.5931	18.6093	20.2113	19.1924	19.0221	20.481	20.2632	21.4702	19.0632	20.2175	19.8038	23.5639	20.3324	19.8601	20.4733	21.1211	18.5021	20.2926	18.5975	20.0939	20.3283	21.0863	19.443	19.6155	20.9392	19.4771	19.7922
CXCL14	ENSG00000145824.11	mRNA	21.3007	15.9794	15.9335	19.9314	23.6145	20.2847	23.6318	22.2885	20.8832	16.0311	22.3919	18.4692	21.5778	20.8218	20.5381	16.4064	19.2766	16.0251	19.9056	22.2168	18.1633	16.7415	17.8996	16.8678	15.2405	18.7863	19.6288	21.9781	20.7167	20.4511	20.3158	19.7956	15.2607	21.0711	20.4821	21.7547	17.8918	21.18	13.7552	20.4892	21.4891	20.2095	17.2573	20.0739	20.4756	17.8246	16.4914
CXCR4	ENSG00000121966.6	mRNA	21.2645	19.202	20.386	20.5762	20.317	19.8666	21.3212	19.955	19.1273	18.2508	18.6642	19.3275	18.9213	18.4766	18.5717	18.3704	19.4389	18.5358	18.0528	20.6519	19.5841	17.474	20.0755	20.0566	18.8662	21.2843	19.245	19.9115	19.4429	19.6673	17.9665	19.6468	21.1097	19.2923	19.2811	19.9287	19.7035	20.0288	16.5838	19.1146	18.7131	19.4401	18.2001	18.6613	19.79	18.6449	18.2071
CXXC5	ENSG00000171604.10	mRNA	18.8731	19.1238	19.8408	19.6838	19.0943	20.2824	20.412	19.4285	19.673	19.1958	19.4533	19.536	19.5705	19.947	19.7905	19.3159	21.0111	19.4866	19.5289	19.3583	19.4782	19.6204	19.6163	20.4666	20.7834	20.022	20.5201	20.1863	20.3501	20.7931	20.5136	19.8365	19.9699	20.2933	19.9124	19.3055	20.6635	20.6742	18.9843	19.5499	19.4248	19.3262	20.5597	19.4622	19.3709	20.1124	19.7928
CYB561	ENSG00000008283.14	mRNA	16.763	16.192	16.3364	17.5777	17.6776	17.1319	15.8256	17.9604	17.2107	16.9621	17.3438	16.0697	17.8795	16.696	16.4223	17.2085	16.2906	15.6101	17.3197	17.5683	17.0474	14.6057	17.3772	15.7786	16.7676	17.144	17.2722	18.0458	16.9672	18.0248	17.1922	17.9445	14.3712	16.0668	16.9237	17.3921	16.7462	16.5605	16.6463	17.4483	16.7515	18.4	16.5758	17.4442	17.1493	17.0988	16.8109
CYBA	ENSG00000051523.9	mRNA	19.8421	18.7466	18.1779	20.2593	19.8749	20.3681	20.5095	19.0196	19.1201	19.1243	19.254	18.2594	18.7215	18.3533	18.5689	18.0638	18.8658	19.0352	18.7425	20.0726	17.0162	16.8612	18.6455	18.75	18.8036	19.8452	19.0333	19.271	18.9261	19.6482	18.0366	19.342	19.6734	18.2105	18.37	19.7596	16.347	18.8527	17.6376	18.5195	17.4556	19.6994	18.2342	17.5398	18.4634	17.7913	18.3817
CYP11A1	ENSG00000140459.16	mRNA	13.4298	9.19199	10.5891	12.6504	14.4284	14.3382	12.7244	12.6521	13.938	10.4824	15.4451	10.4024	15.3056	10.807	11.8429	11.3111	13.3782	10.8967	13.4015	11.8771	11.0318	9.96698	10.2576	12.7924	9.2247	11.6548	11.9475	13.107	13.8159	8.6805	9.49911	10.9825	15.9457	12.3529	13.9412	11.6877	11.6511	12.1105	9.39943	11.6706	9.08892	11.0001	9.5973	13.0395	14.1731	11.2729	10.2957
CYP1A1	ENSG00000140465.12	mRNA	12.312	9.70002	8.03201	9.67527	9.05348	10.1532	7.08577	9.58962	8.13352	0	10.4531	0	7.93814	8.02768	0	7.81671	9.15605	9.01514	11.75	10.3651	8.59872	0	6.83305	11.2312	0	0	7.93197	11.6282	7.63692	8.70377	9.78512	11.0058	10.0188	9.60017	9.50698	9.17705	8.81921	7.01541	12.2689	8.69702	10.3331	8.80355	8.40065	8.06802	9.69562	11.9037	7.00722
CYP2J2	ENSG00000134716.8	mRNA	14.8338	14.2101	15.6487	15.2774	18.01	17.2947	17.0762	16.2637	16.3058	14.7924	17.3949	14.9323	16.97	14.7769	16.8067	15.1904	17.9735	15.2569	16.9454	16.7717	17.6655	16.0594	19.7639	16.5505	14.6811	18.0347	15.5356	15.5649	16.5747	14.7832	14.6276	16.8941	16.4739	16.2812	17.8515	16.4558	14.3472	17.4404	15.9173	16.5988	18.3946	17.6078	14.4125	15.6422	15.5712	16.3203	17.1763
CYP4F3	ENSG00000186529.13	mRNA	11.9134	11.1654	15.9266	10.7782	14.6201	13.1889	12.2117	8.55795	15.4974	12.4124	11.6488	10.9179	10.2503	10.7118	10.4683	11.947	16.9049	10.8275	12.4344	10.7959	8.82758	11.3887	14.8114	11.0082	15.6009	9.6288	9.61673	10.3887	13.3828	14.492	12.1562	11.8594	12.5849	11.6058	14.237	9.89091	12.9763	14.8299	8.91605	12.7976	8.75738	13.4561	8.04629	8.88007	10.2464	15.2491	9.03548
CYP4X1	ENSG00000186377.7	mRNA	12.8648	12.57	13.2125	12.7676	12.9737	13.7529	12.03	12.8262	12.6039	13.4965	14.2438	13.0257	13.7031	14.5084	13.1868	12.9963	12.689	13.7288	17.2136	13.965	14.026	12.742	11.5737	13.0905	11.8993	11.9284	12.0012	9.89024	13.487	12.3794	12.759	12.9387	11.279	12.2666	12.7435	12.3282	13.2915	12.6448	11.778	13.2121	13.085	14.2611	11.7663	15.4652	10.3483	14.4324	12.7125
CYP51A1	ENSG00000001630.14	mRNA	15.6002	14.1287	14.8248	15.0998	14.6812	15.0556	15.0287	16.3933	14.8766	14.5514	14.9706	14.9335	15.5063	15.4834	15.3137	13.6832	15.2329	15.2541	14.9024	15.1797	15.8206	15.2819	15.0419	14.8765	16.3716	15.2389	15.2345	15.8734	14.8182	19.3334	14.6804	15.0929	15.5439	16.247	14.4941	14.8257	14.0294	15.5329	16.0498	15.1754	13.8785	14.9	15.9619	15.4854	16.4402	16.2214	16.2256
CYTH1	ENSG00000108669.15	mRNA	17.2044	17.1038	16.6109	17.4819	17.5938	16.9286	16.9992	16.4557	16.8539	16.8916	17.1445	16.9317	16.7499	16.6289	16.8758	16.4519	16.6986	17.7599	17.4576	17.0653	16.9556	16.7771	16.5735	17.3744	15.9658	15.7555	15.6432	16.9324	15.8559	15.74	16.4533	16.9735	17.391	16.3771	17.4001	16.9098	16.4038	16.5047	16.3472	17.1724	16.5337	17.2082	16.9314	15.8724	15.9357	16.4352	16.5662
DAPK1	ENSG00000196730.11	mRNA	15.9737	15.2812	17.6575	17.1641	16.6563	16.9118	15.78	15.678	17.3103	16.895	16.34	16.6853	15.8068	16.5701	16.7246	17.2398	16.9791	17.4358	16.5654	15.47	14.4053	17.4471	17.292	16.42	16.1268	15.9537	16.921	15.8213	16.238	16.0209	15.3138	16.7819	15.6226	16.6843	16.5884	16.7134	18.2229	16.4806	14.9862	15.8477	16.392	17.0593	14.9506	16.2184	15.4656	16.9162	15.4886
DARS	ENSG00000115866.9	mRNA	19.0415	19.4146	19.2162	18.8052	19.1358	19.1034	19.2531	19.5041	19.0904	18.6537	19.3943	19.0927	19.4157	19.1472	19.2694	19.1442	19.5523	18.8728	18.8701	19.2791	19.5162	20.254	19.6832	18.998	19.3044	19.5868	19.6738	19.4005	19.7459	19.7497	18.9717	19.4823	18.8504	19.2888	19.5871	19.5629	19.6252	19.7946	19.6739	19.15	19.6238	19.8128	19.0464	19.67	19.6739	19.2857	19.1875
DCAF4L1	ENSG00000182308.6	mRNA	11.9202	10.8768	13.2938	12.2293	12.4347	11.4855	11.1864	9.70016	12.6316	13.0662	11.4731	12.4616	11.5877	11.5483	12.0858	11.9511	11.9123	11.626	10.7142	10.154	12.9789	11.6849	10.3472	10.9635	10.7722	10.287	10.9119	10.8911	11.3259	11.1336	12.01	10.9466	11.3737	11.0178	12.446	12.0791	12.5899	13.1739	11.9467	12.9743	13.159	11.6484	10.508	10.7591	11.4425	11.3838	11.1073
DCAF7	ENSG00000136485.13	mRNA	17.8194	19.5121	19.1427	18.004	18.1792	18.5562	17.8574	18.5744	18.6462	19.0431	18.8115	19.2124	18.9094	19.1971	19.1867	19.1592	19.0091	19.3541	18.7421	18.4023	19.2189	19.5625	19.0067	18.9617	19.1174	18.766	19.0178	19.1643	18.3485	17.8537	18.9729	18.2521	18.4892	19.336	18.9981	18.6468	19.8411	19.0649	19.4767	19.2605	19.527	19.1665	19.3793	19.2225	18.4643	19.3039	19.0757
DCHS1	ENSG00000166341.7	mRNA	16.2318	16.8522	17.8186	16.9434	15.5765	17.4258	16.6102	16.6039	17.0775	17.9142	16.4188	18.1197	17.6116	17.9699	17.6258	18.2363	17.026	17.1612	16.8762	16.7323	17.5011	16.8146	17.3049	17.4681	17.3279	16.8234	17.0225	17.1547	16.1315	13.8403	17.661	17.0124	17.4457	17.9433	16.9855	16.8598	17.5798	17.321	16.9531	16.5989	17.992	16.9106	17.8715	17.6549	16.9982	18.0148	17.5301
DCN	ENSG00000011465.15	mRNA	21.5223	17.5166	16.9252	20.4631	19.4746	17.4313	18.2993	20.9749	16.8075	17.8977	17.5421	16.6961	17.8159	18.0581	17.5333	17.5183	16.3438	17.4245	18.2629	22.041	17.6696	16.8307	16.6995	17.2929	20.4693	17.922	17.9604	16.6302	19.7865	17.0775	16.8404	19.6963	15.943	17.3425	17.9254	18.6364	15.3539	17.043	17.9901	16.6459	16.8329	16.5381	16.3972	20.0792	16.1083	17.1677	17.7556
DDIT4	ENSG00000168209.4	mRNA	22.7552	20.0397	19.8835	19.5224	20.2066	19.6838	20.3473	20.1204	17.7788	17.4649	18.8757	19.7294	18.1939	17.4772	18.5869	16.2705	17.896	19.7549	19.7012	20.7428	19.0577	20.9912	20.067	21.2766	20.8403	20.4118	20.4273	19.2643	19.8977	19.0026	19.1397	21.5602	19.8986	21.1918	19.8594	20.4973	18.4377	20.3124	19.1876	19.663	18.7705	19.1742	16.9471	19.9096	21.0152	19.4494	19.5973
DDTL	ENSG00000099974.7	mRNA	15.5267	14.021	15.0741	15.5811	15.2259	14.0052	15.5407	14.2641	16.2469	15.6301	13.7602	14.956	14.6549	15.1056	14.8138	15.0505	14.3937	14.9853	13.9705	14.6042	14.6304	13.6011	15.1228	14.8727	14.4858	13.1354	14.0096	14.4932	15.2253	14.9823	14.9059	13.6604	14.267	14.9437	14.1172	15.9769	13.7237	14.3664	15.1094	14.1682	14.9993	14.8438	13.6647	14.7072	14.391	15.0103	14.8211
DDX60	ENSG00000137628.15	mRNA	16.0457	14.9276	16.4949	17.5287	15.9861	16.0478	15.9239	16.0492	15.4346	15.1595	16.2884	15.636	15.5613	16.7085	15.7032	16.6999	17.4616	14.7208	14.6819	16.1695	14.8779	15.9568	16.566	13.8318	17.9167	15.5699	16.4037	16.4916	17.1942	16.44	14.5947	16.3267	16.9424	15.7036	15.8524	16.2927	15.8569	16.4464	14.8487	16.3736	16.1142	16.3558	15.1633	15.5799	15.356	15.9146	17.1325
DEFB1	ENSG00000164825.3	mRNA	0	11.3217	10.8725	14.0213	11.4815	11.9975	10.9211	0	9.97503	0	0	10.9487	9.77911	10.8681	0	10.6564	10.6777	11.4431	12.2258	9.88883	12.0255	0	9.66734	10.3764	12.0912	0	10.7721	10.3041	14.0599	10.5465	10.0451	10.2666	13.2778	9.638	10.7661	9.69959	10.6621	10.8502	0	0	0	10.0619	0	0	0	0	10.842
DENND3	ENSG00000105339.9	mRNA	15.85	15.0108	15.0208	16.5743	17.0055	16.4838	16.937	15.5983	15.6505	15.4057	17.0113	15.8748	16.4014	15.1444	16.6726	15.2017	16.4933	16.8512	16.0873	17.3657	13.2218	14.1424	15.5203	15.6524	15.6309	15.3875	15.5697	17.224	14.649	16.2196	15.0626	16.0562	15.98	15.4013	16.0747	16.1723	14.723	15.6283	14.6079	16.632	14.6566	16.4034	15.1114	14.6634	15.4533	15.8395	15.5827
DEPTOR	ENSG00000155792.8	mRNA	16.4904	16.545	15.6256	16.1221	16.3859	16.3871	17.8699	14.6686	15.2928	14.9123	15.7703	14.9103	14.322	14.6407	15.3127	14.822	18.2711	16.2724	16.6888	16.7671	14.614	16.065	17.3736	17.0361	14.9572	15.9341	15.3546	15.3866	15.454	17.5246	13.3162	15.7346	16.4368	15.395	16.7568	15.3298	15.3605	15.2948	15.8459	16.1847	14.3406	16.1787	14.034	15.3771	15.4873	14.9077	14.8203
DHRS1	ENSG00000157379.12	mRNA	16.0017	15.8605	15.7766	16.6653	16.7974	17.1682	16.7178	15.2088	17.2551	16.9603	16.4018	16.2453	16.712	16.2045	16.426	16.8568	16.3215	16.6575	16.1986	17.4707	15.1614	15.6946	15.6335	16.4576	15.9796	16.296	16.6577	16.4528	16.389	16.1325	17.0689	16.2979	16.1143	17.1647	17.19	16.938	15.0812	16.4479	15.3114	16.5322	16.1968	16.163	16.4266	16.2737	16.216	15.853	16.2037
DHRS12	ENSG00000102796.9	mRNA	15.4861	15.162	15.9892	15.4263	16.5965	16.17	16.1671	15.7237	16.7511	16.0703	16.3019	14.7866	15.756	15.8146	15.9675	15.8919	15.6304	15.5064	16.2297	15.4353	16.0891	14.9289	15.6032	15.5961	14.5303	15.6028	16.3108	15.9043	15.8638	16.2592	15.3461	15.4163	15.8736	16.0891	16.4602	15.5018	15.9131	15.8434	14.4278	15.3567	16.2979	15.3329	15.672	15.8034	15.5021	15.7938	16.2161
DHRS4	ENSG00000157326.17	mRNA	16.7856	16.4972	17.5119	16.6385	16.7786	17.6284	17.4222	16.2258	16.9231	17.1888	17.076	16.113	16.8297	16.575	16.4493	16.5381	17.661	16.4176	16.5681	17.7443	16.7174	15.7543	17.1272	16.6564	16.4698	16.7657	17.2632	17.0361	16.916	16.9624	17.4089	16.3041	17.8701	15.7329	17.0034	17.2846	16.3831	17.8074	16.7022	17.0764	15.7726	15.9047	16.8948	16.8476	16.6901	15.7872	16.843
DHX58	ENSG00000108771.11	mRNA	16.0902	15.6419	17.4691	17.7031	16.7138	16.9442	17.4553	15.8096	17.5542	16.0625	16.6573	15.9825	16.4051	16.8574	16.588	17.3592	18.4822	15.1359	16.0301	16.8956	15.461	14.8714	17.0593	15.4663	18.0552	15.9791	16.8753	16.8253	17.4292	17.1327	16.8946	16.3978	17.7334	17.2997	17.4199	16.0809	15.158	17.6448	16.7099	16.7165	18.1717	17.0591	16.1533	15.9695	16.3564	15.9557	17.8914
DIO2	ENSG00000211448.10	mRNA	17.3046	13.473	16.9732	16.2369	16.6524	16.5184	17.2546	17.1471	15.1141	12.6274	15.9901	15.2605	14.8458	14.6583	15.0939	15.4162	14.5168	15.8585	17.2975	17.8914	14.6594	14.5777	13.242	15.1496	13.5906	12.0197	13.8935	17.2482	17.2782	15.4173	11.8808	16.447	14.0441	18.9866	17.4759	17.425	13.8854	15.1985	17.6519	15.9286	17.7835	13.4476	12.4544	15.5128	14.2267	16.4127	15.9407
DIP2C	ENSG00000151240.14	mRNA	16.263	17.0023	16.207	15.773	16.0292	16.1485	16.0421	16.2243	15.8226	16.2847	16.359	17.6741	15.9981	16.0987	16.7477	16.3218	16.021	16.9579	16.5811	15.6176	17.2526	17.5957	15.8884	16.7831	15.8976	15.1748	15.8102	16.419	15.8042	15.3175	16.0899	15.8712	17.1538	17.3559	16.7671	16.3688	16.5966	16.1414	17.3945	16.5539	16.0274	15.6615	16.2409	16.0915	16.4029	17.1186	16.3527
DISP2	ENSG00000140323.5	mRNA	12.3872	13.941	15.3736	12.7119	12.1919	15.8667	12.1486	11.7106	15.9637	13.4702	13.604	13.7877	14.5886	13.141	12.7626	13.3936	16.4384	13.858	15.4584	13.1039	14.9456	13.9668	15.165	15.5156	13.3457	12.0555	14.298	13.6997	13.1967	14.599	14.3531	14.7075	15.1814	14.4298	14.6641	11.8553	13.8951	15.4392	12.9137	12.565	15.6065	14.7344	14.7722	14.5033	13.5608	14.4682	12.6428
DIXDC1	ENSG00000150764.12	mRNA	17.6443	16.1663	15.7568	16.5637	16.3062	16.2527	16.2269	16.2284	15.5425	15.6273	16.8947	16.478	15.909	15.5823	16.1985	15.4832	16.5515	16.1784	16.8742	15.3664	16.3935	16.8501	16.073	17.0849	15.1912	14.7894	15.8195	16.6126	16.2781	16.4936	14.9958	16.9148	16.3103	15.0522	16.9071	16.6777	16.9456	16.1964	16.4112	16.1965	15.1847	15.9235	15.4526	15.8454	16.3692	16.2873	15.5011
DKK1	ENSG00000107984.8	mRNA	19.5505	15.7778	11.9137	18.0001	19.9948	14.6978	18.5125	20.6123	15.7841	12.3455	12.6761	12.6488	16.1486	12.5681	12.1725	11.909	12.6406	12.4588	13.0491	17.713	16.8669	13.5348	10.9194	14.1233	11.7594	11.5515	12.0247	13.6513	17.533	15.0535	11.2974	20.1541	18.284	11.8896	16.5189	14.286	12.777	12.9287	18.8905	17.6648	13.5899	12.4983	11.9101	11.9498	20.2195	13.8642	11.6353
DLL1	ENSG00000198719.8	mRNA	15.8656	19.3845	18.7239	14.679	15.4268	16.33	15.6128	14.6784	18.3489	19.1685	16.8597	18.2493	15.2323	17.0479	17.9072	18.1012	18.3708	19.0973	16.7283	15.5589	18.3375	18.7988	16.9635	17.3159	15.9558	14.635	16.174	15.4001	16.572	14.7217	16.8665	14.0807	15.7227	17.1978	17.5361	14.9148	24.2481	17.631	18.5274	17.2271	14.919	16.5323	16.535	16.9525	15.6046	16.6432	16.5663
DLX4	ENSG00000108813.10	mRNA	14.1503	11.1283	9.26555	11.004	10.2886	10.6526	8.99273	8.92055	10.5036	11.8528	10.0787	10.7189	9.17146	9.93839	10.6941	11.9734	10.5547	12.3537	9.71187	10.5428	10.9699	11.4891	11.0577	9.03263	11.3833	7.51292	8.42999	10.9582	10.1307	11.0752	10.1146	12.2894	0	9.51508	11.1574	9.93881	11.5892	12.1288	9.33764	11.7787	8.44357	10.4531	10.3123	11.5629	10.9313	10.5195	10.719
DMKN	ENSG00000161249.19	mRNA	14.2481	10.3612	10.9558	9.67498	11.9126	15.1961	12.8664	9.88854	13.3347	13.5183	15.5946	9.98842	13.7114	9.81486	9.12464	12.5896	14.673	9.35821	12.2497	11.1749	9.28889	7.87924	9.5139	10.8746	10.1311	8.79961	11.9399	11.0431	13.372	12.2573	9.25504	12.6084	8.7351	13.0063	12.7587	9.43937	10.4562	10.4131	6.99428	11.5479	9.99525	9.27185	8.69912	12.0133	11.694	9.59678	12.2728
DNAH14	ENSG00000185842.13	mRNA	9.35099	9.8967	8.2125	11.7092	9.95917	10.0934	8.64688	10.0698	9.0042	9.18951	12.1531	8.97865	9.87391	9.67453	9.01677	10.5208	8.77501	9.9208	9.18543	9.16914	13.6979	9.6413	8.2128	7.60322	7.95454	8.88133	7.003	9.0287	11.0179	8.64405	8.26886	9.07346	8.9749	8.27632	8.72608	10.2414	11.8517	8.57616	8.28446	8.29431	8.8159	8.28565	9.15263	10.5667	8.59335	9.8119	7.48474
DNAH17	ENSG00000187775.15	mRNA	12.9665	11.9748	12.911	12.496	13.9063	12.4147	13.8402	11.3131	14.0815	13.7641	13.5048	12.8278	12.7637	12.5412	13.1453	12.5584	12.4851	13.3491	14.2171	11.7079	12.2363	12.4602	10.7617	15.0623	11.5192	10.9161	10.9262	12.2399	11.8269	11.4938	12.6276	12.0366	13.8685	11.9965	15.2376	12.7424	12.9177	12.2098	12.2005	12.7863	13.6617	11.9052	11.9832	11.7762	11.3879	12.5811	10.8759
DNAJA2	ENSG00000069345.10	mRNA	18.6671	18.6888	18.5387	18.4512	18.7857	17.9136	18.8078	18.6928	18.1578	18.4526	18.6336	18.6695	18.6435	18.7762	18.4485	18.7051	18.1696	18.2675	18.7985	18.9382	18.9059	18.7392	18.3205	18.4682	18.3968	18.7186	19.0081	18.5191	19.6397	18.982	18.4565	17.9684	18.4918	18.634	19.3367	18.9539	18.3834	18.4524	18.8201	18.409	18.7466	18.7121	18.6959	18.8882	18.8607	18.6821	17.9135
DNAJA4	ENSG00000140403.11	mRNA	16.3488	14.0646	16.4161	16.5609	16.3762	16.7393	15.3371	14.8473	16.3329	14.9186	16.8806	16.005	16.0662	16.2151	15.69	16.4967	15.0259	15.6306	17.8817	16.5428	15.7396	14.1985	14.7659	16.3532	16.4175	14.7322	15.0276	16.0054	15.3334	14.3895	16.0182	16.213	15.6284	14.4802	16.7824	16.5308	15.6572	15.2465	13.3286	14.6959	15.7964	15.5443	15.9534	16.3073	16.059	17.418	15.895
DNAJB2	ENSG00000135924.14	mRNA	18.2183	17.7744	18.5737	18.0425	18.2885	18.9325	18.7343	18.3733	19.5358	19.0912	19.3482	18.8696	18.6944	18.4245	18.7891	18.6462	19.3229	18.784	19.2868	18.6453	18.6698	18.4189	19.2765	19.2661	19.1983	19.3153	18.8463	18.5779	18.5136	19.52	19.534	18.7964	18.7517	18.4693	19.438	18.0654	19.4152	19.6883	19.2714	18.8903	19.3644	19.5313	19.0341	18.9497	19.4141	18.8556	18.7952
DNMT3A	ENSG00000119772.15	mRNA	15.2438	16.1049	16.5999	16.6565	16.1506	16.1197	15.9797	16.2779	16.238	16.5973	16.1975	16.5185	16.578	16.9629	16.9604	17.0329	16.3599	16.6498	15.706	15.6894	16.1695	15.7054	15.6742	15.7634	16.621	15.5825	15.6169	16.1132	15.383	15.1341	16.8853	15.719	16.0903	16.5462	16.0124	16.02	16.7563	15.3709	15.8587	16.425	16.9732	16.0948	16.7096	16.3284	15.4104	16.5669	16.4864
DNMT3L	ENSG00000142182.7	mRNA	0	0	7.91825	10.7825	0	0	0	7.89464	0	0	0	8.99139	0	0	0	7.70302	7.72421	7.90417	8.68465	0	10.8035	0	0	0	0	0	7.81824	0	0	0	0	8.31049	7.74003	0	8.80904	7.74515	0	0	0	8	0	0	0	0	0	7.79562	7.88785
DOCK11	ENSG00000147251.14	mRNA	16.8709	16.1504	15.417	16.6112	16.2882	15.9707	15.8971	15.9047	14.8198	15.4675	16.1697	16.1788	15.7024	15.4498	16.6592	15.5512	15.943	16.2875	15.4868	16.3112	16.1328	16.9782	16.9283	15.7162	14.6055	15.7322	15.4294	16.2715	15.0179	16.5435	14.9464	15.9659	16.8376	16.2871	15.2949	16.3049	15.2175	15.3678	15.9708	16.3897	14.176	16.1297	15.3512	15.1455	15.7583	16.1184	15.6583
DOK7	ENSG00000175920.14	mRNA	13.5785	10.1208	12.3195	11.1803	12.4052	13.5651	12.545	14.5202	12.7557	11.9523	13.2377	12.1202	12.4021	13.3306	12.8515	10.6678	12.8864	11.1041	12.4228	11.2713	9.95059	11.3436	13.219	10.885	12.5175	13.717	13.5657	12.6195	12.306	12.4239	14.4516	12.0965	12.6392	12.8823	13.6893	11.6223	12.5162	14.4808	11.9975	11.5787	11.1018	10.9852	12.2813	13.6899	12.7852	11.9948	14.1661
DPH3	ENSG00000154813.8	mRNA	19.0177	18.0278	18.2904	18.1922	18.4083	17.881	18.0171	18.3814	17.8082	18.1877	18.2406	17.9633	18.3408	18.0446	18.0736	17.8898	17.6988	18.0763	18.6199	18.659	17.9057	18.1749	17.4762	18.1963	17.5841	18.3564	18.2788	17.8411	19.4812	19.1363	17.5037	18.6433	17.0977	17.4145	18.0174	18.8807	17.6448	17.6967	18.2847	18.2268	17.7071	18.265	18.0525	18.1376	18.499	17.9424	17.9436
DPP3	ENSG00000254986.6	mRNA	17.4349	17.9557	17.8382	17.5602	17.5834	17.8263	17.3606	18.2863	17.9655	18.026	18.0845	17.4669	17.7181	17.9688	17.6769	17.7185	17.5158	17.5864	17.5889	17.7696	18.4544	17.5849	17.805	17.9617	17.7599	18.2306	17.844	17.9232	17.5097	16.772	18.3192	17.3687	17.4394	17.7963	17.6831	16.9699	17.1292	17.7893	18.361	17.1534	17.4782	18.0511	18.2023	17.994	17.3804	17.8245	17.7733
DPY19L2	ENSG00000177990.10	mRNA	12.3405	11.698	13.287	14.5811	15.112	13.5226	12.8502	9.60964	16.2679	16.0602	15.0406	13.484	14.3395	14.3387	14.1753	16.2671	14.1034	15.0537	14.3731	12.8799	16.0948	12.1791	12.9491	14.3679	10.115	12.2311	13.1518	12.8908	15.1607	14.8963	15.5954	12.163	13.8988	14.57	14.3221	13.9813	13.607	12.5355	14.2887	14.9347	16.005	14.2864	14.3377	14.8456	14.1403	15.2199	13.439
DPYD	ENSG00000188641.11	mRNA	19.039	15.6165	16.3729	18.6021	18.3155	18.5506	18.6399	18.4551	16.0364	16.6461	17.3189	16.2588	17.134	16.5566	17.8353	16.9857	17.7235	16.2252	16.0211	18.4985	16.1714	15.2004	17.4842	16.1364	16.3476	17.474	18.6183	19.3504	16.384	19.4412	16.2115	19.406	16.4568	16.9293	17.7294	19.0237	15.4223	17.7714	16.54	18.1731	15.129	17.8197	16.4048	16.7175	18.7961	16.7968	16.6819
DPYSL3	ENSG00000113657.11	mRNA	20.8953	20.6868	22.0148	20.6803	19.9417	20.9435	21.1595	21.3661	20.3186	20.0088	20.7428	20.5387	20.9847	19.7117	21.4457	20.6601	21.6051	21.7181	20.7099	20.2497	22.2356	21.8469	22.5402	22.1462	20.22	20.962	21.6047	20.1846	20.0268	21.4072	21.0623	20.6707	21.4705	20.8543	21.2323	20.3898	20.5491	20.8306	20.202	21.518	19.3821	21.4659	21.0218	21.379	21.2959	22.082	20.528
DRD5	ENSG00000169676.5	mRNA	10.785	7.45913	7.59396	0	7.6181	13.1715	9.22247	0	8.69184	10.5511	10.7234	9.9861	10.663	10.3905	10.7986	7.37897	9.71521	11.0324	14.1236	9.92547	10.1562	0	0	0	0	0	7.49406	9.02053	8.19457	0	7.76514	8.98299	0	0	8.48405	9.00039	10.6988	9.5661	7.66579	8.67209	8.08992	9.36249	7.38008	8.62627	7.67597	11.4638	7.56359
DSC2	ENSG00000134755.13	mRNA	14.6541	13.3279	10.3489	14.0409	15.357	14.0979	13.5665	13.6422	12.3781	11.7609	14.4133	12.9339	13.742	11.4595	12.331	13.2611	12.8841	13.1355	12.9638	14.3021	15.0502	11.0479	12.9203	12.9297	9.27384	14.0409	12.5855	14.1171	12.6142	13.1093	11.1579	15.0514	12.0867	11.4665	12.9045	14.0648	11.5826	12.3158	12.2948	13.5175	12.5832	13.8747	11.7181	11.9149	13.8112	11.8496	10.6077
DSP	ENSG00000096696.12	mRNA	12.356	12.2311	13.2982	12.2063	13.0351	13.1517	12.5648	12.9637	11.8406	12.9409	13.3266	12.3294	12.3888	14.0064	12.8383	13.81	12.2656	12.5766	12.6243	14.0456	13.5637	12.2922	12.1361	10.3686	13.1719	13.2448	11.3716	11.8805	13.1729	10.9534	11.8919	14.8281	12.6936	13.8727	12.5748	13.0257	12.3593	12.2309	12.5774	12.1686	13.947	12.8405	10.1646	16.9895	11.3359	13.2003	13.0778
DTX4	ENSG00000110042.6	mRNA	14.3911	16.1107	17.1912	15.322	16.3988	17.0236	15.1722	15.2551	16.8783	16.3238	17.981	17.0054	17.4142	15.9718	17.6321	18.2121	18.6059	17.8024	16.9277	15.3077	16.4544	19.2788	18.298	17.534	14.7092	17.2349	14.488	15.0995	16.7444	14.4408	16.0024	15.6151	16.5115	16.2063	17.7882	15.1957	17.4319	16.2552	16.0729	17.1525	17.9554	17.8245	15.8522	16.1715	14.3039	17.2676	15.9863
DUSP1	ENSG00000120129.5	mRNA	24.0267	20.9851	22.1068	21.463	20.635	20.5352	21.436	20.1096	19.5098	19.0054	20.7829	20.3342	20.3904	18.9335	19.0162	18.0261	19.8571	19.4024	20.2933	23.3061	20.9708	19.3739	22.312	21.4089	20.2128	21.9377	20.6623	21.3226	20.9716	21.413	19.2741	23.6359	19.816	21.653	21.2061	21.4539	19.1521	20.1911	18.6927	22.256	18.7092	19.5524	18.357	20.7665	20.1768	20.1379	19.4661
DUSP2	ENSG00000158050.4	mRNA	20.4604	15.646	15.5502	16.4266	13.788	15.1917	14.3811	14.5473	13.6311	14.8204	14.7177	13.8638	14.1888	13.8066	13.035	14.5232	15.2765	13.65	16.218	15.0622	14.1532	10.8199	15.1018	15.1933	13.1915	15.2278	14.0043	13.8116	15.5043	14.3379	13.2768	14.2277	14.2013	15.4604	13.7046	14.8826	14.1699	14.2939	13.251	14.9612	11.6772	13.6604	13.5486	15.7998	15.2967	14.515	13.5812
DUSP23	ENSG00000158716.7	mRNA	19.9659	17.4841	17.6917	19.9021	20.1079	18.8537	19.5058	19.5485	18.8301	18.6436	18.6541	17.5182	19.0562	17.468	17.2243	16.9396	17.9474	17.574	18.8074	19.5356	19.4326	15.7472	17.6331	18.2675	18.2104	18.6052	18.5632	18.3829	18.3457	19.4359	17.1019	20.2926	18.0243	18.068	17.3088	19.7583	18.5778	17.2812	17.0514	18.3136	16.2829	18.4102	17.4986	19.063	19.4921	18.3663	18.3392
DUSP9	ENSG00000130829.16	mRNA	13.7604	15.312	9.65751	10.5667	12.3125	13.4594	13.9675	10.8958	10.6065	10.6609	11.8239	13.7677	13.2841	9.33168	11.6711	11.3661	12.7538	13.7955	12.7753	11.9936	11.4878	11.8815	9.93647	17.7711	9.9694	10.2206	11.0414	10.5734	13.185	10.5935	10.0921	10.0507	11.4032	13.8398	14.4369	12.4456	13.9563	15.1508	11.9913	14.0598	7.83826	10.5236	13.3856	13.203	12.5039	12.8547	10.6261
DZIP1	ENSG00000134874.16	mRNA	15.8822	17.1435	16.723	16.0165	16.3486	15.8723	16.1163	15.8955	17.197	17.3148	17.1205	17.1522	16.5235	17.63	17.0998	17.9322	15.7439	17.3519	16.8085	15.8512	17.0038	16.5229	15.507	16.4878	17.454	15.6955	15.8027	16.8175	17.0825	15.9374	16.1515	15.7218	16.0423	17.1155	17.2455	16.723	17.6336	17.0105	16.6531	16.1608	17.4853	14.8411	17.7741	17.2714	16.2775	17.2847	17.0635
EBF1	ENSG00000164330.15	mRNA	15.7826	14.966	15.5173	17.1798	14.1813	13.9199	14.0032	16.9142	14.1458	14.296	14.0101	14.0634	15.5408	15.1526	14.4939	15.1031	13.7331	14.6372	14.1678	15.6465	13.1406	13.3901	16.1621	14.4248	13.88	13.6624	13.514	14.3184	12.641	14.4234	13.7947	15.0732	14.9894	14.6619	14.1922	14.0171	15.0856	14.7868	15.0168	14.8617	15.2852	14.3459	13.5116	15.2017	12.4323	14.2464	14.5415
EBP	ENSG00000147155.9	mRNA	19.3369	18.1179	17.9253	18.5208	17.971	18.4419	18.724	18.6452	17.8929	18.3671	17.3948	17.6104	17.7027	17.8043	17.2106	17.2155	17.7076	18.0389	18.068	17.8849	18.9062	17.6505	17.8499	18.3852	18.0974	18.3967	17.8409	16.9809	18.5999	18.8934	18.4004	18.06	18.6614	18.0883	17.4598	17.9975	17.2748	17.867	18.3197	17.6063	18.1187	18.3066	18.0597	17.9506	19.193	17.8613	17.9896
ECM2	ENSG00000106823.11	mRNA	17.0777	15.7466	15.5037	17.09	16.234	17.6035	17.0618	16.7974	18.2823	16.2468	17.7522	16.9682	17.1233	15.9354	17.8192	16.7474	17.4501	15.769	15.392	16.857	14.2776	15.3544	19.6265	15.5048	17.1179	16.7366	17.2653	16.5067	17.2912	18.3506	15.8761	16.9528	17.6483	16.5923	17.9459	17.0445	17.6879	17.4156	16.3347	18.1233	17.0018	18.3746	14.9053	16.4614	17.2526	15.4999	15.4446
EDN1	ENSG00000078401.6	mRNA	17.2265	17.3857	19.1163	15.1307	16.5286	16.0985	17.6311	13.8257	15.4008	16.2838	15.9342	17.9011	17.4135	15.9538	17.4024	16.3385	15.0641	15.934	16.5436	18.8002	15.2706	16.9453	16.7962	18.126	16.562	18.6346	17.3212	16.3489	16.7787	15.6369	15.9942	16.8207	16.6837	19.0594	18.1155	16.3808	16.2662	17.0578	13.8779	16.4652	17.6323	15.1116	15.481	16.788	15.736	18.0143	17.0858
EDNRA	ENSG00000151617.14	mRNA	18.3682	18.1966	16.2684	17.2541	16.5421	17.6038	17.3941	18.3888	16.4196	16.7608	16.2499	17.2375	18.0747	17.4427	17.2706	17.0386	18.6786	17.4906	16.4082	18.1026	16.2167	16.1534	16.2571	16.0663	15.38	15.1074	15.8104	17.0033	15.2395	16.6919	16.4033	17.329	15.9728	18.4928	17.3534	16.5692	15.7126	18.3855	18.4512	17.6533	17.0433	17.4466	16.7646	17.2841	15.853	16.697	16.8653
EEF1A2	ENSG00000101210.9	mRNA	19.4653	20.9879	20.3903	18.4268	19.0197	21.1699	20.2261	18.467	19.8169	18.8097	20.3117	20.833	20.7581	19.9242	20.0056	18.0313	18.0516	19.1541	22.1271	19.9707	21.7071	17.4373	18.0741	22.0219	18.8817	21.6539	21.6249	18.0886	18.7163	17.9357	20.1353	16.0603	18.3213	20.1189	18.7472	20.1571	20.7874	20.8205	21.0243	19.649	15.0556	20.8588	20.2092	21.1747	21.402	22.158	21.2012
EEPD1	ENSG00000122547.9	mRNA	15.7581	17.3256	17.8685	17.1626	16.6375	17.1982	17.9132	16.3389	17.921	18.2817	17.8273	17.2517	16.5348	17.0479	17.8773	16.7037	17.5881	18.1463	17.0367	16.2	16.7184	18.6794	17.2199	18.8077	17.8687	16.1514	18.3867	16.4609	15.8368	16.0801	17.4004	15.6615	17.79	17.9894	16.253	16.2092	18.8245	16.7637	18.2014	17.8786	17.6627	18.297	16.9994	16.8844	16.8789	16.0486	17.5429
EFCAB14	ENSG00000159658.9	mRNA	18.7005	18.227	18.5814	18.821	18.9183	18.8606	18.9104	18.8648	18.7668	18.4049	19.0931	18.5415	19.3213	19.1246	19.4281	19.1067	19.0652	18.5767	18.2161	19.0708	18.3219	19.2771	19.1565	18.0864	19.2666	18.3416	18.8862	19.3011	18.2767	19.008	18.6902	18.8694	18.8198	18.905	19.4054	18.9292	18.6388	18.8595	18.9344	19.1692	19.0526	18.8678	18.7253	19.1525	18.7052	18.9247	18.848
EFNA1	ENSG00000169242.10	mRNA	17.4932	18.8083	16.6047	16.7095	18.5278	17.9144	18.8671	17.6422	18.3515	19.3891	18.322	18.413	18.3563	17.6542	17.9999	18.0505	18.3209	18.4077	18.3202	18.2815	18.8157	19.5097	16.9741	18.5772	16.7621	17.4734	19.3221	19.1821	19.2344	19.1821	18.0619	17.6027	17.1949	18.5222	18.6576	18.7399	17.7429	18.8899	18.6374	18.8161	17.5846	17.5792	18.8886	18.3355	19.1839	17.7968	18.1333
EGF	ENSG00000138798.10	mRNA	14.8651	12.1225	12.6348	13.6461	14.5691	13.6026	12.8551	13.9882	13.164	14.2787	14.4798	12.6257	13.7979	13.5272	14.6089	13.0309	14.6078	11.2225	12.1307	14.3	11.9304	10.9621	15.1654	12.2501	12.8921	13.0954	14.1627	15.1966	14.1078	15.617	11.9787	13.6834	14.9639	14.0699	15.1351	13.8571	11.5666	15.4102	13.5307	13.2962	12.7123	12.9198	12.2436	12.8279	15.1133	11.4952	14.5958
EGFR	ENSG00000146648.14	mRNA	16.3617	16.8405	23.2593	16.8579	18.2386	19.3476	18.7553	17.1453	22.7019	24.4054	18.0867	19.195	16.9398	23.0651	22.008	23.5131	20.0792	17.6309	16.3359	16.7751	17.7894	20.2403	20.5863	21.0129	23.7809	21.3069	23.6742	20.731	22.0753	21.5338	22.401	17.8737	19.1904	19.4611	21.6597	17.0629	22.1398	21.9236	17.2077	17.9498	18.452	17.68	19.86	22.2991	17.914	23.4607	22.1842
EHBP1L1	ENSG00000173442.10	mRNA	17.4694	15.7589	15.2952	19.0641	17.235	17.0325	16.88	18.1642	17.1104	16.7247	17.7637	16.2013	17.0817	16.535	16.9556	16.545	17.5912	16.8312	16.4266	17.275	15.7228	14.8054	15.6946	15.1005	16.7112	16.2065	15.83	17.3854	15.3158	15.5683	17.0641	17.8883	16.5101	15.701	16.4309	16.5432	15.0385	17.3601	15.2657	16.6867	14.8452	16.7954	16.2633	16.2296	16.8796	15.7808	16.4137
EHD3	ENSG00000013016.13	mRNA	17.3462	16.8464	16.1524	17.6804	17.5415	17.9458	15.6897	17.6937	16.1429	16.1382	17.6874	16.0474	17.1498	16.4995	16.4841	16.9608	17.5277	17.415	18.7901	16.7516	18.4062	18.3458	16.564	16.265	16.646	16.3099	16.3623	17.0068	16.0613	16.3365	17.1235	16.9272	15.5261	16.879	17.244	16.0256	17.2203	15.9226	17.2605	17.3686	16.6827	17.1589	16.5362	16.8505	16.0601	18.4045	16.7495
EIF4EBP2	ENSG00000148730.6	mRNA	18.6463	18.9387	18.3645	18.8209	18.4027	18.437	18.3522	18.292	17.8727	18.1722	18.2386	18.3493	18.1964	18.4312	18.6417	18.3211	18.4375	19.2766	18.147	18.2925	18.8308	19.5469	18.3784	18.3844	18.7911	18.1139	18.235	18.2226	18.0116	18.41	18.2891	18.4819	18.9142	18.3501	18.0084	18.3627	18.751	18.0869	17.885	18.5418	18.0112	18.2435	18.2623	18.2664	18.6393	18.1001	18.4175
EIF4H	ENSG00000106682.13	mRNA	20.8881	20.9862	21.0032	21.2001	20.5912	21.1263	20.5961	21.7771	20.776	20.9065	21.0497	21.2007	21.0554	20.9551	21.2465	20.4887	21.0456	20.7011	20.8937	21.1545	20.6764	20.8596	21.1213	20.9882	21.3286	21.0869	21.5434	21.3679	19.7086	20.8661	21.3708	21.1633	21.1861	21.7945	21.3973	20.7754	21.293	21.3606	20.859	21.2611	20.9491	21.2866	21.4077	20.9312	21.6202	20.9251	21.6543
ELF1	ENSG00000120690.12	mRNA	17.9227	17.1791	17.3414	17.9264	17.9635	17.0329	17.8359	17.6572	16.7737	16.9989	18.0724	17.8596	17.5957	17.3379	17.8592	17.8229	17.117	17.6156	17.0826	18.1108	16.7031	16.884	17.5031	17.1894	17.2918	17.4138	17.7466	18.1108	17.5873	17.6948	16.4109	17.4741	17.923	17.6233	17.814	17.7747	18.1207	16.5078	16.5566	17.0942	16.7179	17.039	17.3127	17.6995	17.4544	17.1951	18.0259
ELF3	ENSG00000163435.14	mRNA	12.444	10.8702	11.3535	10.6674	11.9852	15.408	10.0106	9.39847	12.5057	11.6092	12.0564	10.3599	11.2245	10.5422	10.2373	10.8327	14.1667	10.6478	10.6373	9.56307	10.2308	10.7312	12.181	10.5527	10.2964	6.53992	11.2531	12.5621	12.1187	15.3245	12.1102	12.5043	10.6405	9.63379	11.4985	10.036	10.6579	9.64058	9.35694	11.4355	10.5472	11.5423	9.33273	9.16919	11.1729	11.0081	10.5749
ELF5	ENSG00000135374.8	mRNA	10.1597	7.51117	10.3404	8.70431	12.4962	8.76759	8.69092	10.3167	9.54996	8.38437	11.2494	9.03975	7.55226	6.6489	9.20051	6.43933	13.563	6.6392	8.73299	12.8834	0	0	0	7.15261	0	8.20741	7.5461	13.0702	9.82852	10.8983	6.82362	10.0338	8.0502	6.42022	12.1176	9.63667	9.01607	10.0773	6.72471	10.9695	8.14206	9.41474	7.4321	7.68199	8.31074	11.8014	0
ELMO2	ENSG00000062598.16	mRNA	17.7913	17.9099	18.3782	17.825	17.8095	18.1513	17.7795	18.0333	18.5393	18.0807	18.8325	17.918	18.4152	18.5009	18.4058	17.9856	18.4433	18.3658	18.3455	17.6721	17.9218	18.6046	18.7672	18.6732	18.2874	18.5131	18.0578	17.947	18.0792	18.1401	18.528	17.7127	17.9243	18.1757	18.2539	17.4525	18.4927	18.3591	18.4343	18.4207	18.9333	18.7617	18.6714	18.4613	17.9854	18.2557	18.2088
ELMOD1	ENSG00000110675.11	mRNA	18.0092	16.0476	15.6874	13.4688	17.6842	16.1637	16.5499	17.131	15.4803	15.6178	16.1758	14.9069	17.7415	16.5666	16.2567	15.2981	13.2017	17.0282	17.6701	18.0742	16.61	13.6456	14.4517	16.2919	15.3382	14.8596	17.0663	18.7993	16.5021	13.9308	17.0969	15.8985	11.5702	17.1008	17.6211	18.6431	15.0493	13.3328	17.86	16.4963	13.095	15.482	17.009	16.9602	17.5205	17.3266	15.8684
ELOVL1	ENSG00000066322.11	mRNA	19.7342	18.6901	18.5039	19.8444	19.8818	19.9294	20.5629	20.579	19.3212	19.3328	19.9691	18.5135	19.5446	19.4839	19.2534	18.6034	19.0767	18.9465	20.1235	19.8107	19.5547	18.5386	18.8201	20.5465	19.9228	20.4163	19.4582	19.2256	19.5858	19.7808	19.8222	19.6871	19.6858	18.7946	20.5267	19.8106	19.0664	19.2715	18.7752	19.2742	19.4773	19.3297	19.2441	19.5827	19.8521	18.5708	19.5634
ELOVL7	ENSG00000164181.12	mRNA	14.2943	13.4431	14.8222	14.6406	16.3147	15.3232	15.8111	13.2757	14.585	15.1397	16.0218	14.3111	15.198	14.4664	14.6315	14.8601	15.6346	14.469	16.0716	15.6142	13.5737	13.4821	14.6161	15.1498	14.7861	16.2398	14.2471	14.1315	15.0863	14.3951	13.605	15.9012	17.1167	13.9772	16.7894	14.5369	14.8981	14.0084	14.7724	14.9756	12.9937	15.5464	12.3286	13.6148	12.1217	14.7136	14.396
ELP2	ENSG00000134759.12	mRNA	17.677	17.5613	17.3321	17.5191	17.0514	16.852	17.3145	17.052	16.9756	17.2572	16.8394	16.7816	16.9056	17.118	17.0453	17.4264	16.5693	17.3425	17.0097	16.9091	17.23	17.9768	17.3533	17.2296	17.5123	17.8509	17.1901	17.1535	17.6158	17.778	16.9467	16.8103	17.3118	16.409	17.1062	16.8616	16.4773	16.5659	16.3736	17.2598	17.1404	16.9863	17.1548	17.0377	17.2335	16.9627	17.1412
EMILIN3	ENSG00000183798.4	mRNA	14.3469	16.4192	17.0435	11.1929	15.2375	18.9965	17.5989	11.9034	18.7172	14.9635	15.6751	18.179	16.15	14.6462	16.7891	17.4051	17.9072	16.9819	14.7281	14.2289	16.7432	16.6649	19.2293	20.0797	20.2772	18.6946	17.044	15.3249	17.5502	14.2566	19.2856	15.1889	17.7436	19.1164	18.3599	13.8684	19.5214	17.8565	11.7623	15.6298	15.3347	14.2709	17.0872	19.5462	18.215	20.2489	20.0245
EML2	ENSG00000125746.13	mRNA	15.2662	14.2499	16.4717	15.7963	16.7301	16.9931	16.966	16.6343	16.5483	16.0705	17.0432	14.5915	16.8551	16.2076	16.3319	15.8761	16.4285	15.9278	16.6658	15.009	15.2926	14.5998	15.8311	16.9081	16.8513	15.9782	16.1105	16.6971	15.014	14.5177	16.4035	16.8886	16.2489	16.4064	16.8929	15.8363	16.3189	16.2574	15.3509	15.2066	15.293	15.1629	15.4192	16.2273	16.4641	16.9618	16.4168
ENDOD1	ENSG00000149218.4	mRNA	18.729	18.0669	18.1027	18.0464	19.4319	18.7425	18.8468	19.9066	17.8443	18.0393	19.6254	18.1765	20.0316	19.3696	18.8261	18.4297	19.1139	17.5981	18.7158	19.294	18.2856	17.4947	19.0504	18.7652	18.7912	19.1422	18.8565	19.2186	19.309	18.9554	18.9307	19.7014	18.6028	19.2406	20.1567	20.0598	17.8883	18.4781	19.0101	18.6774	18.2605	18.4579	18.4156	19.2776	19.1001	19.0341	19.4802
ENG	ENSG00000106991.12	mRNA	19.3251	19.4096	18.472	19.6865	19.6898	20.0935	19.9887	20.8013	19.1451	19.8424	19.4866	18.7273	19.8916	19.342	19.5497	19.3036	19.4216	19.4785	19.0984	20.7175	18.4379	18.357	18.4224	18.7151	19.1085	19.6364	18.9068	20.4083	17.9073	18.4722	19.0756	20.1441	19.4714	19.2607	19.0071	19.4079	17.0304	19.2798	19.5345	19.3306	20.0236	19.9251	19.2762	19.8496	19.0224	19.18	19.1414
ENO2	ENSG00000111674.7	mRNA	20.161	20.3215	19.2794	19.0271	19.0581	20.3267	20.1614	19.7438	19.0769	19.5207	19.7944	21.0088	20.5222	19.1443	19.7631	19.0974	20.4919	19.7181	21.2285	20.1023	20.6586	19.5539	17.9961	21.1906	18.9134	18.4942	20.5548	20.9415	20.0474	20.826	20.5788	20.6083	20.6282	20.4148	20.1326	20.2551	19.6567	20.7043	19.8215	20.0966	19.0957	20.1843	19.9069	19.1184	21.6349	19.8666	18.9801
ENO3	ENSG00000108515.16	mRNA	14.2953	15.2026	14.3563	15.7445	15.8868	13.7849	15.5087	13.5642	15.9466	15.6494	14.5722	15.3962	15.0663	14.8146	15.2515	15.5949	17.1738	14.9151	13.6137	14.2444	14.9811	13.8771	14.287	13.8671	14.3947	13.1019	14.4186	13.3065	14.8858	13.549	15.9883	12.9816	15.5651	15.277	15.3267	14.168	15.7114	17.1372	15.6722	15.0494	15.4128	13.9275	14.2583	14.1926	14.7243	14.1056	13.7937
ENOPH1	ENSG00000145293.13	mRNA	19.518	20.0346	19.7966	19.3185	19.9102	20.0216	19.9395	19.9964	19.9572	20.3606	19.9919	20.6188	20.3477	20.3779	20.353	19.9445	19.9229	19.9987	20.789	20.0333	20.3021	20.9867	20.0445	20.6276	19.9824	21.4667	20.6245	19.8721	20.9512	20.5016	20.1858	20.0902	19.9478	20.3329	20.2589	20.0003	19.9268	20.348	20.8303	19.6445	20.5438	20.2141	21.0713	20.5436	20.1819	20.2382	20.359
ENOSF1	ENSG00000132199.17	mRNA	14.6812	14.6978	15.0097	16.0343	16.7198	14.4311	14.9149	15.0597	15.4089	15	14.4228	16.9547	14.526	13.6565	15.6839	14.9036	14.0524	15.7811	15.1802	14.1625	15.3137	14.9535	15.2424	14.2643	15.5505	14.1071	15.315	14.9923	14.8411	14.1863	15.2396	14.8092	16.5821	16.3046	14.8	16.0489	13.2758	14.4639	14.1852	15.0449	15.2784	13.632	12.5847	14.4955	13.0511	13.3035	12.7082
ENPP7	ENSG00000182156.8	mRNA	0	9.16826	6.99078	0	9.59049	9.10748	10.6139	7.96148	9.40533	0	10.1168	0	9.88666	7.98076	6.74481	6.77641	10.2451	9.55213	7.75495	7.00624	7.55558	8.9447	6.78637	9.80656	9.20097	8.54697	7.88506	9.99704	8.58631	7.66035	7.16153	9.95946	10.261	0	8.87601	8.39478	6.78207	0	0	7.07223	0	9.49219	7.77093	7.02664	7.07257	6.86863	9.53577
EPAS1	ENSG00000116016.12	mRNA	18.9752	18.545	18.7521	18.5834	19.2899	19.3569	19.893	19.2091	18.766	18.8727	18.7873	19.5959	19.547	19.4233	19.2055	19.7297	18.337	19.0763	18.9087	20.4123	18.514	18.3897	18.4389	18.6844	18.9335	18.7019	19.8133	21.0135	17.9124	18.3123	18.2751	20.8425	18.4797	19.9453	20.3072	19.5387	17.6625	19.3828	19.2476	19.1882	20.2694	18.6827	18.2701	19.8486	19.2607	19.504	19.2072
EPB41L3	ENSG00000082397.14	mRNA	17.4969	16.487	14.8483	17.2283	17.4304	17.1373	16.607	15.9943	14.6233	14.5903	16.844	16.3476	15.624	15.3769	16.2956	15.3853	15.5631	16.8456	17.388	16.8266	17.4203	13.8325	16.2606	16.3678	14.2568	16.4503	16.0266	16.3023	15.2828	15.5419	14.3194	17.2885	16.0067	14.6188	16.6248	16.2143	16.2135	14.8	16.1372	16.5279	12.9637	16.437	13.9894	14.2623	15.5761	16.5458	14.4453
EPGN	ENSG00000182585.8	mRNA	10.7312	9.39916	9.94909	0	0	0	8.00189	0	9.05223	10.4269	0	8.02944	0	7.94912	9.70126	9.73313	0	8.93643	8.71992	7.96899	0	9.9115	7.7482	8.45537	8.58555	8.51529	0	0	0	0	9.12224	9.34351	7.77521	0	0	8.77705	7.74389	7.93127	0	9.61651	0	8.14161	0	7.98946	0	0	0
EPHB3	ENSG00000182580.2	mRNA	15.5249	17.9668	16.1965	15.9319	16.3548	17.0695	15.5114	16.9417	17.065	19.0876	15.6372	17.5231	16.7756	17.8003	17.3407	17.823	16.7114	17.6181	16.8934	14.6647	18.0701	17.4501	16.9894	17.7283	17.1677	17.1431	17.9377	14.9768	16.7056	15.4854	18.5841	14.657	15.9112	17.9063	16.1784	15.7405	16.5129	15.9707	17.4386	16.4917	17.0978	16.1033	18.1966	18.137	15.542	17.5896	17.9906
EPHX2	ENSG00000120915.12	mRNA	15.4872	15.0139	15.709	15.8421	17.1637	16.4853	16.8312	16.1257	16.4163	15.2448	17.443	14.443	16.4909	15.5208	14.9674	16.0404	17.0356	14.1861	15.8386	16.102	13.3639	15.983	17.233	15.5372	17.1776	16.409	16.305	16.2863	16.656	16.6025	15.3988	16.2191	16.776	17.3628	16.4787	16.5311	16.0645	16.3765	12.2416	16.0084	17.6001	16.8884	15.0415	16.1514	15.9228	14.3742	15.1069
EPHX4	ENSG00000172031.6	mRNA	14.0435	14.6806	14.625	13.222	15.6205	16.154	14.1927	15.4705	14.308	14.9625	15.3303	13.9221	16.6739	15.0749	14.1431	14.733	13.7452	15.0568	16.7405	16.0006	14.2709	14.5056	12.4303	13.9979	13.5185	14.1069	13.7647	14.2173	16.2338	15.3869	13.8958	14.2394	15.9729	14.6954	14.2578	15.1419	14.5654	14.1218	14.9179	14.4463	15.6101	14.4101	13.6307	14.1319	13.8062	15.8395	14.7038
EPS8L2	ENSG00000177106.13	mRNA	15.5668	11.8063	14.9981	16.3211	16.1389	16.6228	14.7975	15.6381	16.2085	15.9195	17.3245	16.0321	16.0814	14.7568	16.3793	15.8775	16.6253	13.3816	14.76	14.0815	12.8663	13.1181	14.4403	15.4415	14.2982	14.7743	16.1235	16.7706	15.7956	15.848	16.177	17.7946	13.2786	14.7416	16.7458	13.988	13.018	17.2873	12.7794	15.1178	12.796	11.9463	14.6825	15.7304	14.3688	14.8039	13.8294
EREG	ENSG00000124882.3	mRNA	18.0284	9.15851	8.87957	10.9393	14.8511	11.7394	6.35786	16.6385	10.3945	8.03828	7.84893	12.123	10.5905	6.30554	8.63205	7.66742	6.11757	9.08741	12.3826	14.807	8.86315	8.25864	9.89427	9.1197	9.25001	11.1778	7.20094	14.3739	10.7029	9.55224	7.47172	15.5679	6.13323	8.86646	9.18757	13.9881	10.5415	9.2716	8.36812	12.2319	7.79619	10.5688	8.66498	0	10.3751	7.76002	10.7213
ESRP2	ENSG00000103067.10	mRNA	8.85372	9.36748	9.65466	10.301	10.2633	0	9.38172	8.31178	10.6037	10.658	9.75819	10.4083	10.0454	10.3277	10.4058	10.5751	10.6605	9.77787	8.68827	9.15641	9.48641	9.87981	7.13509	9.15902	8.96799	7.90071	9.0406	8.76554	9.52103	8.59345	9.96384	8.72801	9.96073	9.79747	10.0332	8.7454	9.12304	11.3092	9.57496	10.5839	9.41616	9.8433	8.12105	10.1757	8.41759	9.21022	8.626
ESRRG	ENSG00000196482.15	mRNA	12.2712	11.6162	15.0297	11.9449	13.9645	13.5931	13.8955	12.89	13.9285	12.7053	13.7089	14.05	13.8117	13.7513	13.7294	13.9242	12.3343	12.8369	13.8074	14.8883	13.2222	11.4093	14.4498	13.3863	10.579	12.2084	13.3567	12.6234	13.5397	13.6178	12.2995	12.7972	14.1912	13.1843	13.6363	14.0054	14.0524	10.5471	13.046	12.3482	13.333	13.2275	12.0631	12.7352	13.8122	13.8761	14.1326
ESYT3	ENSG00000158220.12	mRNA	11.6406	10.7345	10.8344	10.4327	11.3179	11.445	12.3807	12.3084	11.2865	10.9541	11.782	11.5657	11.9413	11.8115	11.9222	11.2268	11.6748	12.2922	12.843	10.7376	12.5882	10.4751	11.213	9.82424	9.31802	9.53676	9.58303	8.75365	11.9732	8.99566	9.38629	11.9718	10.463	10.4866	12.3124	11.4676	11.3892	11.2449	11.044	11.118	11.2583	10.8306	8.8846	11.1631	7.92198	12.2714	10.1828
ETV6	ENSG00000139083.9	mRNA	16.6341	16.7607	16.8067	17.8486	16.8849	16.9329	17.2354	16.7136	16.9173	16.694	16.9809	17.0131	17.0629	17.1421	17.0523	17.1629	16.9191	16.2332	16.0302	17.0248	16.6506	15.3302	16.1713	16.0152	16.8495	16.2672	16.4402	17.6532	16.1495	17.5275	16.921	17.5057	17.0363	16.9222	16.4942	17.0985	16.2903	16.2426	16.6747	17.0809	17.2152	17.2187	16.6946	16.6514	16.4019	16.4011	16.6626
EVA1C	ENSG00000166979.11	mRNA	17.1505	15.0884	17.3013	16.9936	16.6545	18.4667	18.156	16.7218	17.727	17.1653	18.1453	16.516	16.7224	17.1511	17.1319	17.3211	15.7091	14.6875	16.0178	16.9904	15.7963	14.4801	18.2888	16.5059	16.279	17.5671	17.5545	17.2389	17.6289	18.1043	17.63	17.8166	17.8765	17.5046	17.3548	16.3859	14.9131	17.2295	16.0308	16.7598	18.0587	18.2202	17.1562	17.5007	18.3503	16.473	17.1925
EVPL	ENSG00000167880.6	mRNA	7.10623	8.08966	6.91003	6.97158	8.24894	8.02899	7.53935	6.88652	8.58858	9.2266	7.45734	9.29849	8.97653	6.90572	7.2444	8.00933	6.71686	7.47693	10.3118	0	8.05688	10.6686	6.70573	7.99226	7.53993	8.7869	5.82326	11.284	7.5091	7.57937	6.09133	0	8.3085	7.66956	8.38083	7.73093	5.71523	6.88794	9.55707	8.79069	10.0979	8.41302	6.69688	6.94588	7.57297	9.68347	5.89196
EVPLL	ENSG00000214860.4	mRNA	0	0	0	0	0	0	0	0	0	0	0	0	0	0	0	0	0	7.6913	0	0	8.27162	9.6626	0	0	0	0	0	0	0	0	0	0	7.52727	0	0	0	0	0	0	7.78707	0	0	7.4914	0	0	0	7.675
FAAH2	ENSG00000165591.6	mRNA	12.1611	12.9432	12.1858	11.8556	12.1397	11.5041	11.4273	10.7703	13.4801	13.5934	12.2191	12.6246	11.5068	13.8764	11.1307	13.332	15.4748	13.4796	13.0858	12.667	12.9468	13.8431	10.9097	12.2971	12.8198	11.3574	10.8634	13.2246	13.7887	11.9268	12.7203	0	14.9805	14.2301	12.5938	12.5737	12.3378	13.2305	12.3892	13.0453	10.877	14.3396	11.4855	11.9996	11.3356	13.4515	11.0852
FABP3	ENSG00000121769.6	mRNA	18.9815	17.9516	17.4528	18.1538	19.0944	19.3465	18.8546	18.0612	17.7604	17.9091	18.2457	19.6646	17.6239	17.8043	18.3482	17.3218	17.5115	17.9916	20.7026	19.5461	17.9419	16.961	16.7386	18.5284	16.3812	18.7386	18.2104	18.184	18.635	18.5257	16.9752	18.4232	18.0254	17.3797	18.2025	19.1515	17.6064	17.1904	18.8049	16.9071	16.643	17.7595	18.847	17.544	17.1605	20.4086	17.9753
FABP4	ENSG00000170323.7	mRNA	16.9868	17.5096	11.1335	14.4961	15.3271	12.0363	11.9594	14.5113	11.7497	12.9414	12.7513	11.9871	12.2316	11.4916	12.1652	11.917	11.8314	13.1695	14.8223	12.5893	16.4018	14.0953	11.2899	11.1517	10.5456	11.4747	12.7488	11.5646	15.2863	13.7543	10.8203	14.7416	10.1478	9.09262	13.0266	13.8242	12.0223	11.1112	13.9214	13.0516	10.8244	11.3223	10.6963	15.6655	10.409	11.3728	11.4654
FABP5	ENSG00000164687.9	mRNA	18.8509	18.6774	18.8028	18.8325	20.6977	19.5234	18.5591	19.4094	20.121	20.575	19.5965	20.6772	19.2695	17.6044	18.1722	17.2486	19.6258	17.0351	19.1066	20.4685	21.3327	16.6095	19.6972	18.0617	16.8418	17.2229	17.3384	19.871	21.0327	19.4422	16.4321	19.0271	18.552	20.4362	19.0198	22.4762	17.0437	20.2663	15.2424	19.4019	18.5679	18.8307	18.5195	18.2199	17.7491	18.6028	19.0925
FAF1	ENSG00000185104.18	mRNA	17.6214	17.7715	17.6277	17.5519	17.3832	17.6821	17.9042	17.6685	17.127	17.6479	17.4005	17.4768	17.2175	17.6493	17.2762	17.3915	14.6301	17.4173	16.542	17.3699	18.1063	17.9622	17.44	17.6947	17.9048	18.2057	17.4948	17.4435	18.0404	17.9803	17.5888	17.5657	18.4514	17.4643	17.4332	17.6031	17.8845	18.0079	17.9554	17.302	17.4201	17.331	17.6811	17.5072	18.2672	16.7953	17.7098
FAIM	ENSG00000158234.11	mRNA	16.5238	16.4219	16.1777	15.5331	15.8222	16.3904	15.9946	15.697	16.7031	16.4531	16.8039	15.8658	16.46	16.2944	16.3987	16.393	16.0477	16.3444	16.0053	16.5161	15.5044	17.1054	16.0344	15.7846	16.1398	16.5396	16.2486	16.0766	16.0602	15.7495	16.0772	16.2754	15.6601	15.6723	16.4788	16.6773	15.2253	15.6323	15.5503	16.5303	16.3099	16.5938	16.0172	16.709	16.2708	16.2144	16.5803
FAM110B	ENSG00000169122.10	mRNA	16.5177	19.0056	17.328	15.4152	16.1551	17.1583	16.9868	16.1431	16.3038	16.8125	17.5537	17.1032	16.7833	17.1677	16.7671	16.3392	16.7802	18.3889	16.9991	17.0307	17.3726	17.4296	16.8961	18.6894	16.9542	16.7828	16.9157	17.9702	16.9454	16.3326	17.3236	16.7327	16.7007	17.553	16.4611	17.0478	16.482	17.1454	17.8509	16.6334	17.4974	16.576	17.6378	16.8264	16.4215	17.2897	17.7081
FAM110C	ENSG00000184731.5	mRNA	14.586	12.5899	18.0986	10.5818	15.1825	17.4317	14.414	11.702	14.9647	13.8327	16.0997	13.6761	16.2845	12.0998	13.5246	13.951	16.9499	13.7701	14.5357	16.3693	11.7092	12.4815	12.97	11.4924	10.2611	10.9678	16.7362	17.2859	14.7615	18.8481	9.99183	18.2022	15.5965	17.1489	16.8283	14.8294	14.7424	14.3886	9.21495	16.0349	10.7768	13.2928	9.77488	11.0252	14.9561	12.4504	13.4604
FAM117B	ENSG00000138439.11	mRNA	14.6422	16.7452	15.8817	15.0654	14.9395	14.9946	14.721	14.3815	14.5798	15.0645	14.943	15.6369	14.5863	15.2433	15.1546	15.4868	15.2422	16.2265	15.8349	14.4257	15.6107	16.5756	15.1119	16.61	15.1402	14.6777	15.0437	15.1564	15.0999	15.3869	15.2238	14.5378	15.2261	15.119	15.5534	14.1755	16.2363	15.5226	15.6216	15.8111	14.6243	16.179	15.5989	15.11	14.5931	15.4965	15.0558
FAM24B	ENSG00000213185.5	mRNA	12.3547	14.5859	11.3796	12.9558	15.0054	13.5046	14.7289	14.3809	14.5805	11.5358	11.9976	13.97	14.6869	13.3748	12.1313	11.1635	11.5472	15.017	15.6074	13.0469	15.8126	10.535	14.2963	15.3608	14.1601	11.136	11.6416	12.4627	13.0819	12.8307	14.873	14.489	15.8925	9.33839	12.0505	14.4853	10.3623	15.2359	10.2301	11.8241	11.3923	15.1181	14.334	13.0003	14.298	12.2562	12.1264
FAM50B	ENSG00000145945.5	mRNA	16.6802	14.687	16.3365	17.0325	15.324	17.6964	16.8826	17.3368	17.8412	15.8648	17.4449	15.2993	17.0104	16.7978	16.3331	13.7699	17.5984	15.6691	17.5827	16.9677	17.356	14.2786	16.3717	16.5253	17.8128	16.4034	16.9803	15.0429	15.8608	15.8881	17.566	16.6035	18.0374	17.6324	17.1681	16.2939	15.2085	17.5658	13.514	15.8397	17.0622	17.3854	16.9948	16.9318	13.7721	17.2939	15.9709
FAM53A	ENSG00000174137.11	mRNA	11.6217	10.9102	11.0457	13.8186	12.1739	11.8489	12.6048	13.159	11.7323	12.0891	13.0817	11.6072	11.4367	9.89017	10.9351	11.5518	12.2833	11.2331	12.2996	11.909	10.9927	11.271	13.1318	12.085	11.2647	10.4577	11.0827	10.1556	10.3274	11.098	12.1049	11.761	12.2168	11.6173	12.6612	12.8532	13.4785	10.8715	11.2553	10.5066	12.745	13.5559	11.6377	12.9882	10.9761	11.6448	12.1847
FAM78A	ENSG00000126882.11	mRNA	15.7524	15.9636	15.055	17.4424	16.3348	16.5659	16.87	15.8317	15.8862	15.5068	16.7136	14.9037	15.7964	15.815	16.4854	15.7258	16.5653	16.4143	15.6518	16.6394	14.2912	14.4186	15.9505	15.6936	15.8147	15.7971	15.1927	16.4425	14.2907	15.3115	15.6018	15.8961	16.2601	15.013	15.4939	15.6229	14.621	15.3725	15.0565	15.4604	15.3457	15.671	15.1715	14.6175	15.185	14.9075	15.7807
FAM83A	ENSG00000147689.15	mRNA	8.93321	8.60068	0	8.21447	9.87381	12.0807	8.78442	6.14439	7.25889	8.3084	7.70561	8.22866	7.6455	8.1483	8.71027	8.74209	8.27924	8.94371	9.24074	8.97338	10.8043	11.2804	9.11394	9.23855	11.4827	9.03596	6.06878	8.90379	8.34015	9.99272	8.3241	8.13134	9.67076	10.0833	9.85003	8.78432	9.39865	8.45134	8.22459	7.821	10.1064	8.34088	8.52137	7.1936	8.81815	8.02993	9.11963
FAM91A1	ENSG00000176853.14	mRNA	18.7715	17.5266	17.1591	17.7336	17.9778	16.9485	17.2592	17.6808	17.0529	16.9763	17.4349	17.5431	17.691	17.294	17.583	17.6286	17.632	16.8882	16.8695	17.6059	17.657	17.3	17.5921	17.209	17.2903	17.3118	17.5418	17.8061	17.6672	18.0386	16.7905	17.8644	17.5442	17.1913	17.7258	17.6165	17.5752	17.2627	17.7369	17.5405	16.9615	17.761	17.1311	17.4094	17.2693	17.1148	17.1794
FAP	ENSG00000078098.12	mRNA	17.4115	12.8292	11.9061	18.085	15.073	14.2329	14.4095	18.4552	14.8219	13.4406	12.7725	12.5016	13.4746	13.3075	12.9701	13.1315	14.2428	12.8918	13.0988	15.0616	12.0271	11.4212	14.5274	12.48	14.076	12.4208	13.7123	14.2504	14.0939	14.2726	11.9526	16.6007	15.1006	12.1559	13.8812	15.8666	11.6957	15.2078	12.3751	14.2757	13.1265	12.4547	11.2106	14.3158	12.6206	11.4909	11.9687
FAXC	ENSG00000146267.11	mRNA	13.5216	15.7532	14.164	11.4549	13.6968	14.3075	12.5598	14.6079	13.9761	15.1006	14.3816	14.8785	15.1158	13.4288	14.1648	13.8798	13.619	15.3042	16.3762	13.3232	15.4573	15.4829	15.2281	15.0123	13.0369	14.2405	14.471	13.1457	14.9188	14.9113	14.336	14.4865	14.4526	13.635	14.7969	14.3862	14.6983	13.7166	14.5545	15.1654	14.0832	15.0142	15.0267	13.5614	14.8827	14.8848	13.7245
FBLN1	ENSG00000077942.16	mRNA	21.8338	18.489	17.2099	20.8884	18.7208	19.2631	20.6125	19.4293	16.0148	15.9577	16.335	17.7673	16.6365	16.0723	16.1877	15.0356	19.4456	16.7397	17.0964	17.5888	18.0322	15.7495	17.4904	17.7142	15.7724	16.2288	17.0884	15.9164	17.3405	16.1727	16.114	21.4961	19.14	17.2049	16.9356	18.0225	17.465	18.5512	18.1113	16.4879	15.524	17.4389	15.2561	18.7537	19.5478	16.772	16.8369
FBLN5	ENSG00000140092.13	mRNA	17.1933	16.3767	17.1766	16.2395	16.8047	19.9248	16.6367	16.81	18.7557	18.632	18.4673	18.5441	17.4585	15.6507	17.0177	16.4389	17.1108	15.5554	16.5377	15.9574	15.4706	15.21	18.5258	17.1333	15.2968	17.9268	16.8811	19.435	18.0435	18.8613	17.092	18.8951	16.1933	18.4562	17.9768	15.9771	14.2481	16.6689	14.2515	18.5835	18.0339	17.4323	15.6955	18.6189	16.3969	16.8094	16.952
FBLN7	ENSG00000144152.11	mRNA	17.2981	11.9763	14.4686	14.1625	14.3229	15.9628	17.3115	16.047	14.2679	15.4671	13.2254	14.8057	14.7697	15.8313	15.6257	15.2283	16.6119	12.1838	14.018	16.9281	16.1871	14.074	14.9599	14.3544	17.1081	15.6836	15.5103	17.6413	15.1394	13.5444	16.4122	17.8975	15.3818	16.0422	15.5789	16.5115	16.3206	17.4023	13.6928	14.7411	15.0951	15.3629	15.4152	16.4729	16.6218	15.9246	15.7798
FBN2	ENSG00000138829.9	mRNA	14.4247	13.5268	15.2063	14.0478	12.9421	12.8543	10.1347	16.5504	10.5799	9.15048	13.6804	14.3509	10.7987	15.6654	10.4227	16.5075	11.9237	15.2679	9.98435	11.2908	16.3624	15.4438	11.7617	10.3444	12.7415	8.97329	13.5313	16.4724	13.7487	12.4731	8.26151	16.3018	9.49273	14.2352	12.8612	14.0759	14.0393	8.23721	15.2204	12.9808	14.0828	13.7084	11.8701	13.9883	11.3966	13.2192	13.8998
FBXL16	ENSG00000127585.10	mRNA	17.2445	18.7158	17.6865	13.3808	17.0663	19.9628	16.7768	14.7644	17.7722	17.8919	19.0895	17.8141	18.1912	17.5951	17.486	16.8342	17.6208	18.8117	20.8414	16.1347	18.0177	16.9777	17.8673	18.129	17.1227	16.4271	17.9946	16.8005	16.4665	14.266	18.2408	13.9989	16.0133	17.8332	18.7029	17.2599	18.9748	17.6449	18.4585	17.3797	13.5758	18.385	18.085	16.8886	16.9072	19.128	16.7633
FBXO40	ENSG00000163833.7	mRNA	8.4409	7.69539	8.82715	8.30563	9.84981	10.6873	9.28994	7.22498	9.15079	7.40384	9.66638	7.90628	7.73651	9.5585	7.58342	0	7.63634	8.22968	11.053	8.25932	6.82034	8.20628	7.04384	0	6.88543	6.8156	7.73034	6.68439	8.43133	0	0	6.64714	7.65215	7.01468	8.13769	7.07588	9.73067	7.80815	10.4821	6.33903	7.7439	9.01563	0	6.29367	6.33936	9.43986	6.22787
FBXO5	ENSG00000112029.8	mRNA	16.0519	18.2529	17.2379	16.5154	15.3189	16.3947	15.0819	16.4867	16.0683	16.8416	15.8204	17.5639	16.3055	16.8738	16.5301	16.4054	17.1143	16.7716	16.6748	16.0762	16.9876	17.223	16.211	16.0444	16.6523	17.3254	16.3129	16.0241	17.2214	16.3814	16.2153	16.3254	17.2391	15.7309	15.5563	16.5509	16.5752	17.4273	16.9587	16.3871	16.1609	16.6194	17.3467	16.7167	16.8288	16.4833	16.5691
FCGR1B	ENSG00000198019.11	mRNA	14.7057	14.0929	13.5722	16.7234	15.635	15.6003	16.3187	14.6973	14.3984	14.5885	15.8412	14.576	15.3466	14.7237	14.7133	13.7151	14.5816	15.2193	14.957	16.5778	12.9026	14.0554	13.3971	13.1373	14.0751	13.4197	14.5554	15.2009	15.1111	16.5329	13.6636	15.7997	14.7824	12.2727	14.1121	16.089	13.1601	13.4526	13.1869	15.8721	13.6553	16.5251	14.7038	12.6698	13.9765	14.22	13.4104
FCHO1	ENSG00000130475.13	mRNA	15.0108	13.8414	14.8404	15.6746	15.5861	15.3177	15.8013	14.9672	14.6329	14.6336	15.59	14.5081	14.8862	13.9297	14.8274	13.3574	15.5558	15.6298	16.0014	14.7476	14.1697	14.1425	14.8461	16.386	14.2262	12.9905	13.6149	14.7287	13.03	13.8782	13.7824	13.6684	15.0521	13.8498	15.7908	14.0424	14.2162	14.3412	13.1641	15.104	12.3807	13.8957	14.1645	13.0886	13.9497	15.3812	13.5979
FERMT1	ENSG00000101311.14	mRNA	14.5883	16.4028	13.3623	16.3643	15.6945	15.4052	14.4559	17.8935	16.1234	15.5355	14.516	14.2426	14.8605	14.053	13.2244	15.8622	15.3748	18.2495	14.7758	14.7755	18.8179	19.0836	16.5219	17.3428	14.8135	13.1186	14.4189	13.6106	15.4143	15.688	14.3118	14.5467	15.0164	14.0011	13.5823	14.9858	14.7854	13.8862	17.3707	17.75	14.1119	17.3931	15.2887	15.111	13.3622	15.3832	15.1423
FGA	ENSG00000171560.13	mRNA	0	0	0	6.89696	0	0	0	0	0	0	0	0	0	0	0	0	0	0	0	6.8509	0	0	0	0	0	0	0	0	0	0	0	9.21884	0	0	0	0	0	0	0	0	0	0	0	0	0	0	7.79873
FGD1	ENSG00000102302.7	mRNA	17.0873	17.632	17.0783	17.4777	16.3388	17.2668	16.9665	17.3184	16.7829	17.4983	16.6342	17.3379	17.1095	17.063	17.1021	16.8132	16.7793	17.3424	17.2263	16.5845	17.5889	17.6419	16.9683	17.1048	17.7786	16.9558	17.2398	16.7642	16.5137	16.4906	17.7166	17.0144	18.7863	17.9332	16.8571	17.1572	17.3623	16.9365	17.2938	17.4882	17.3664	17.5145	18.1137	17.2207	17.8274	17.3011	17.4805
FGD6	ENSG00000180263.12	mRNA	13.9847	13.5329	14.9503	15.26	14.7767	14.204	13.722	13.3738	13.4323	13.897	14.8773	13.7837	13.7108	14.2976	14.2473	14.6287	14.6146	14.1047	14.5398	14.4542	13.8153	14.6008	15.5263	13.4252	13.9457	13.4433	12.5975	13.008	13.4742	13.4834	13.077	14.3152	15.2184	13.433	13.6576	13.6711	13.9686	13.69	13.794	14.1754	14.4155	14.1989	12.6474	14.5646	12.9874	13.6638	13.3369
FGF18	ENSG00000156427.7	mRNA	13.3002	10.6822	12.0652	11.4645	12.0115	11.9428	9.8671	11.7006	11.5043	12.061	11.8709	12.8934	11.893	10.8134	10.5698	11.7711	11.4299	11.5037	12.1097	12.4178	11.386	9.78095	9.19821	11.3211	8.45522	11.3812	10.8872	11.949	12.3273	14.5783	11.5744	12.4588	12.4962	10.1676	11.8808	12.3438	8.61015	11.7951	9.47612	12.8992	12.5632	10.5917	9.18929	12.4972	12.0696	11.2793	10.1096
FGF9	ENSG00000102678.6	mRNA	12.377	13.8377	13.9099	9.85795	12.4303	11.5577	11.2586	9.41019	13.084	11.9104	13.4611	15.8881	12.4846	12.2351	11.1319	12.8514	11.3843	15.3685	14.7287	11.8883	10.0017	13.4938	10.9426	14.5957	9.84513	8.7764	10.6948	12.1435	12.3978	10.1069	11.1894	9.34224	13.187	13.8402	13.425	11.8772	13.1556	12.3303	13.1562	12.1987	10.5829	12.5949	10.1111	13.0358	10.9555	14.4438	8.59763
FGFBP1	ENSG00000137440.4	mRNA	0	0	0	8.43049	0	0	0	0	0	8.52446	0	8.44468	8.27467	0	0	0	0	0	0	0	0	0	8.16315	0	0	0	0	9.79716	0	0	0	8.76124	0	8.13387	0	8.19532	0	0	0	0	0	0	0	0	0	0	0
FGFR2	ENSG00000066468.19	mRNA	15.6062	18.9222	16.6022	15.3951	16.9699	16.9677	17.6864	15.3547	16.2806	16.1556	17.6616	16.5383	15.606	15.9317	17.2357	16.0948	16.7231	17.6202	18.0883	14.8811	14.0932	17.5672	17.6279	18.1569	17.3854	14.7518	16.5343	16.6365	16.5433	16.5437	16.1568	15.1387	18.1226	17.377	18.4949	15.7146	18.1301	16.7297	13.8141	16.6491	16.2146	15.9649	15.3422	16.5663	16.7932	15.9279	16.3336
FGL1	ENSG00000104760.15	mRNA	11.7415	11.1189	10.4069	11.1466	14.1195	12.3796	13.1327	9.64695	11.5082	9.82673	13.8575	9.96897	11.1602	11.0802	11.6942	10.7754	11.4745	13.4097	13.3123	12.054	11.1125	10.6321	12.2	11.0476	9.30531	10.6485	11.8907	10.8379	10.8578	11.4587	10.4269	11.8703	13.227	10.0197	11.4374	12.2679	10.1966	10.522	11.2442	9.75262	14.2115	11.0808	11.5132	8.70846	0	11.9611	10.2245
FHOD3	ENSG00000134775.14	mRNA	16.3249	16.3106	15.7004	16.3479	14.2637	15.5385	12.8732	15.3421	14.2143	15.0301	15.514	14.8378	15.5628	14.028	14.2759	14.4857	15.7084	16.113	16.0198	15.3948	16.0255	16.1462	15.8418	15.7597	10.9716	14.9879	13.7896	13.6791	13.711	13.8534	15.5359	15.6226	16.5656	15.1361	14.5396	14.3118	15.2804	14.0341	14.4246	16.0576	13.7543	16.5412	15.8221	14.5532	14.844	15.3464	15.1402
FIGN	ENSG00000182263.12	mRNA	14.4658	14.5075	15.0421	13.8863	14.8007	15.9134	15.2161	14.3151	15.4578	14.9579	15.7802	15.8127	14.5102	15.8498	16.0954	16.1179	16.3138	16.3777	13.3391	14.5257	13.8367	15.5164	15.5087	14.8139	16.6392	14.5165	15.3456	16.016	14.9482	16.2046	15.3606	15.1976	13.3588	15.4075	15.0803	15.7809	14.9049	12.2262	15.3403	16.3252	15.851	15.6144	14.5262	15.3781	15.029	16.4483	15.5315
FLI1	ENSG00000151702.15	mRNA	15.7454	15.8055	15.3592	16.8812	16.2721	15.924	16.545	15.571	15.568	15.8691	16.3301	15.5017	15.6875	16.1161	15.8801	16.2421	15.8884	16.0681	15.2746	16.8341	14.2813	14.7498	15.6993	15.2513	15.4215	16.422	15.0333	15.8313	14.2681	15.7307	14.9594	16.0797	15.798	15.3892	15.5462	15.598	14.2203	15.4801	15.1993	15.9094	16.2771	15.9915	14.8762	15.4507	14.7103	15.6202	15.6267
FLII	ENSG00000177731.14	mRNA	18.7221	18.1675	18.2337	18.8979	18.5289	19.4039	18.4485	19.0037	18.8024	18.4479	18.9043	18.1992	18.5692	18.5429	18.6357	18.3268	19.383	18.5989	18.0139	18.7643	18.1334	18.156	18.5855	17.8893	18.5545	18.532	18.7172	19.0505	17.4888	17.8371	18.8475	18.9419	18.997	18.8512	18.5941	18.3011	18.6807	19.5866	17.9383	18.8222	17.6347	18.7984	18.3373	18.1741	18.9523	18.5684	18.6693
FLNC	ENSG00000128591.14	mRNA	18.8817	14.686	16.9818	20.6961	17.9885	16.8136	17.7436	19.755	19.6944	16.9345	18.8941	18.9274	18.9616	15.3214	19.1437	15.153	16.6398	17.0059	16.7008	17.2271	16.7896	15.4739	17.7512	17.0174	15.8323	16.5584	18.5959	19.4373	17.345	16.5748	17.4747	18.8123	16.6491	16.5464	17.3356	17.2466	20.7594	20.1845	16.4173	19.2335	13.9111	19.0502	16.4165	19.911	17.4589	16.8044	16.7415
FLT3LG	ENSG00000090554.11	mRNA	14.1822	13.7474	14.9561	14.9374	14.512	15.0672	15.5314	14.3403	15.4054	13.5835	13.1468	13.4617	14.1344	14.3489	14.1584	13.9397	14.8104	14.1293	12.7674	14.256	13.5389	12.8454	14.2717	13.7323	15.5614	14.0905	13.7825	14.3874	15.0609	14.6582	14.2644	14.2915	14.1633	14.3198	14.3208	14.2009	14.1749	15.0958	14.0706	13.9799	14.8405	14.4755	13.9777	13.6009	14.1877	13.8472	14.0089
FLVCR2	ENSG00000119686.8	mRNA	15.9582	15.8382	15.8208	16.6755	17.7044	15.9844	16.261	15.9315	15.3021	15.6323	16.1238	15.3178	15.8422	15.782	16.0663	15.4814	16.7531	15.4386	15.2678	16.782	14.3362	15.5915	15.5872	14.4651	14.6522	15.9226	15.1033	15.6068	14.9143	15.5416	15.1781	15.929	15.591	16.1264	15.152	16.2083	14.3978	15.4709	14.8209	15.7497	15.5668	16.1789	15.1121	15.4412	14.374	14.9224	16.2362
FN3K	ENSG00000167363.12	mRNA	15.928	16.6519	17.0826	15.2287	17.554	18.0507	18.0083	16.7369	17.7476	18.5123	18.1614	17.3394	17.5052	17.3739	17.3412	17.1021	16.4484	16.9323	17.8859	16.6975	16.7886	16.986	16.8411	18.1469	17.1656	17.0721	17.1993	16.9253	18.1276	16.766	17.5385	16.7651	17.4651	17.7755	18.221	17.004	16.6767	17.4995	17.7333	17.0843	18.9789	16.2545	17.1103	17.6819	16.9019	17.5492	16.8428
FNDC3A	ENSG00000102531.15	mRNA	17.8882	17.3602	18.59	18.0319	18.4306	17.7593	17.9964	18.5582	17.687	18.1854	18.3291	17.9116	18.6949	18.5137	19.0175	18.8316	17.1871	18.0931	17.6365	17.8112	17.7784	17.9757	17.7479	18.0273	18.1782	17.5162	18.9404	18.8359	18.3481	18.2981	17.1409	17.7123	17.9739	18.6121	18.5876	18.3629	18.403	17.5999	17.824	17.5815	17.773	17.3441	18.3531	18.5466	18.0125	18.6749	18.2799
FOS	ENSG00000170345.8	mRNA	21.9027	22.1006	23.5289	21.4462	19.5562	20.6332	21.2579	18.9221	19.8014	20.9135	21.4433	20.0337	20.2695	19.8633	19.9356	19.4746	20.9734	19.3789	20.0897	22.359	21.0805	18.674	22.1409	21.3499	18.7353	20.5697	20.9567	21.038	20.5466	20.1901	20.442	21.699	20.2283	23.161	21.5145	21.7012	19.3426	20.8031	19.5095	23.0969	18.5792	19.2071	20.4161	21.5855	20.1238	20.5563	19.1436
FOXB1	ENSG00000171956.6	mRNA	7.16065	13.1212	10.124	9.01764	9.30129	10.0796	0	7.935	14.2247	12.1094	0	7.04009	7.86476	8.5373	6.71847	12.1632	0	8.9416	6.73528	6.97987	8.52523	10.9159	15.3687	0	0	12.3242	6.8648	9.97049	10.1422	10.9493	0	8.35089	6.78692	0	13.2388	9.36609	13.6128	10.8382	11.1955	7.04585	10.0373	8.14677	7.74447	8.57769	8.04072	0	0
FOXC1	ENSG00000054598.6	mRNA	17.3934	15.6051	16.1979	15.6739	15.4279	16.5813	15.9725	16.2979	16.3493	16.799	15.6233	15.607	15.7139	16.8434	16.482	16.7622	15.8653	15.6961	15.1801	16.3372	14.8032	15.551	16.5613	14.7804	16.3808	16.0011	15.5048	16.3445	15.8421	15.4442	15.664	17.694	14.8788	15.9156	16.8094	15.3394	14.7213	16.7139	16.684	16.3546	16.5217	15.5618	14.9763	17.8241	15.0558	16.0571	15.7777
FOXC2	ENSG00000176692.5	mRNA	16.0573	13.9621	12.3053	13.6683	13.6919	13.5301	12.9387	15.921	12.5539	13.2086	13.2188	12.3291	13.9884	13.6227	13.2941	12.954	12.6953	14.1701	13.4954	13.8171	13.1107	11.0456	10.2926	12.9083	12.8324	11.6468	12.9823	13.9514	12.686	12.8155	13.3136	14.6727	12.5283	13.9764	12.2983	12.5719	10.9883	13.7609	12.818	13.7497	12.8539	12.4416	12.5682	16.3508	11.9727	13.7144	12.8936
FOXD1	ENSG00000251493.3	mRNA	15.9214	17.3639	17.1993	16.2891	13.5998	14.0272	16.3845	15.9775	16.7761	14.4071	13.8331	16.2186	13.907	16.0937	16.1591	13.5786	14.5433	17.6115	15.9148	16.5361	16.7072	17.6366	16.8267	15.7943	17.7527	16.3585	16.8055	16.8654	16.084	15.7377	16.8786	16.7007	13.3748	16.1162	16.4308	16.0803	15.7786	14.4413	17.109	16.059	16.1212	13.2219	16.5422	17.1229	12.6364	17.0779	16.7665
FOXF1	ENSG00000103241.6	mRNA	16.2074	15.2149	14.6934	13.5145	14.0059	14.1184	15.9088	14.4122	16.4099	14.8002	14.078	18.8628	14.7813	14.8834	14.7106	17.1087	13.368	14.2826	13.4343	16.9886	11.954	13.2773	15.5416	14.5946	14.382	15.5108	12.4163	15.1589	14.2826	14.678	13.3745	12.4312	13.6843	15.8018	14.9633	15.2785	13.6894	14.8533	15.1995	15.6334	14.9909	13.6413	16.0446	13.7015	11.5993	15.0986	15.0231
FOXF2	ENSG00000137273.3	mRNA	15.67	17.711	16.675	15.8537	15.6388	16.3111	17.0507	17.2689	17.0949	17.7985	15.5509	16.655	16.9212	17.9023	17.4128	17.1673	15.9424	17.1495	15.6994	16.6906	14.9606	15.6846	14.9312	16.058	15.8819	16.1664	15.9911	16.7239	15.7649	15.5996	16.4386	15.664	15.1499	17.6235	16.7313	15.7472	14.5008	17.0839	16.1208	16.4673	17.5445	15.4592	16.3994	16.7774	13.284	17.2004	16.8372
FOXK2	ENSG00000141568.18	mRNA	16.4016	17.1736	17.0058	16.3189	16.4588	17.0463	15.85	16.7432	16.7148	17.2038	16.6059	16.9483	16.8135	16.5746	16.8089	16.5297	16.941	16.934	16.5645	16.204	17.0631	16.616	16.8231	16.7262	16.9413	16.5636	16.7054	16.7127	16.0127	15.8947	17.3057	16.95	17.417	17.2208	16.4909	16.5884	17.2623	17.2498	17.6695	16.7294	17.3911	16.7512	17.3422	16.6714	16.664	17.0513	17.1205
FOXL2	ENSG00000183770.5	mRNA	13.4144	13.4123	13.62	11.3249	12.3743	12.558	13.218	11.0466	14.4832	14.1601	12.4382	13.9534	12.4163	13.6504	12.7958	13.9531	11.9258	12.8333	12.7593	13.2781	11.5317	11.5471	12.5483	13.1237	12.9411	12.6842	11.4843	12.7813	13.6729	11.5216	12.8608	11.2415	11.6687	13.7134	12.9109	12.5481	14.0743	14.5888	12.5442	13.8039	13.433	10.7739	12.135	12.6562	11.2522	13.4968	13.0133
FOXP2	ENSG00000128573.21	mRNA	12.484	13.4054	8.91704	9.28327	12.6259	11.7074	10.234	10.4763	9.25277	12.8411	11.4937	9.29749	10.2881	10.438	9.16597	8.70133	10.7823	13.892	12.6884	11.8313	9.48457	9.7906	12.7187	12.1885	8.63432	11.7658	10.2509	10.7182	10.6786	8.09067	9.4601	12.7203	8.5583	7.76762	11.0062	10.1459	16.0392	9.05496	12.3503	12.8919	13.3079	14.1162	11.9869	10.671	8.7198	10.8741	10.2891
FOXQ1	ENSG00000164379.5	mRNA	12.6189	14.6744	15.1885	11.4131	13.1823	14.3241	14.7638	12.9593	14.7004	15.8502	13.5495	14.5807	13.8652	16.0466	15.453	15.4049	13.4188	14.4575	13.5255	14.1528	11.5976	13.4505	13.7533	13.6198	14.3633	15.1001	12.2504	13.318	11.4396	10.7033	13.155	14.7973	13.0977	16.4831	13.8764	13.4398	13.4032	15.2255	12.349	13.4684	15.6142	13.918	14.2059	13.5884	10.9191	15.2718	14.5217
FPGT	ENSG00000254685.5	mRNA	16.574	15.7215	15.7348	16.4848	17.1685	16.5967	16.4158	16.7434	16.0126	15.9467	17.0393	16.2933	16.5286	16.7792	16.7678	15.8781	16.4508	15.9818	16.2935	16.7547	17.1651	17.0186	17.1665	15.8244	16.8532	17.4707	16.7683	16.4058	18.0837	18.1911	16.244	16.2244	16.2613	16.5576	16.2143	17.7807	16.938	16.2621	16.117	16.1608	16.1633	16.3998	16.6197	16.8361	17.1811	16.1339	16.645
FRMPD2	ENSG00000170324.18	mRNA	8.83831	6.70837	10.0793	5.91621	6.86676	11.4155	7.88481	5.83191	11.7137	8.5751	12.2884	8.90936	8.54704	10.4706	10.9403	11.1064	11.0621	9.9049	12.1691	10.4317	9.98496	10.1157	9.94731	10.0355	10.787	8.39807	8.31912	8.26605	8.7585	8.50785	9.46357	10.8095	8.65464	12.5136	10.8943	10.3577	9.86906	11.4522	0	9.61443	7.91915	11.2674	8.78818	10.5111	6.92442	13.02	8.97235
FRMPD3	ENSG00000147234.9	mRNA	12.3016	15.1627	15.9247	14.0918	13.0025	15.9613	15.9596	12.0313	16.4736	15.8974	14.6468	16.2359	13.6051	15.0832	15.6913	15.2613	16.732	16.959	14.5656	14.6935	15.656	16.2642	16.0522	15.2879	16.6166	12.4977	15.3894	15.8886	13.385	14.8479	13.5521	13.8882	16.3862	16.0991	15.3223	14.5228	16.6343	16.0042	17.1129	16.2685	13.7174	16.1779	14.4628	14.3759	15.4187	15.9593	15.1868
FSCN3	ENSG00000106328.9	mRNA	9.64389	6.9982	12.077	11.8853	10.7325	0	10.7568	10.1	10.2255	12.7052	10.0899	10.7845	9.83711	8.7065	11.1229	10.2294	9.92901	9.69499	11.1399	9.72469	9.27822	9.08746	10.6176	9.62789	9.34378	10.0095	9.83093	9.87717	10.5339	10.6045	11.6168	11.2171	10.6448	10.3474	9.6028	9.75759	10.8196	10.4231	9.19709	11.6644	12.2058	11.2188	10.2305	9.74522	11.7902	9.32345	10.7932
FUOM	ENSG00000148803.10	mRNA	17.846	16.3713	15.412	17.6554	17.7765	16.8196	17.2761	17.3383	16.2134	16.157	16.8921	15.1663	15.8195	15.8427	15.641	15.7535	16.3598	16.794	16.6074	17.0087	16.7358	14.9321	15.5438	16.7636	16.3377	16.6681	16.8654	15.8661	16.8948	17.2748	16.1728	16.5123	15.9814	14.1649	15.6796	17.1396	15.6366	15.7815	16.3826	15.4471	14.2663	16.6794	16.064	15.7677	15.6579	15.6268	15.6636
FZD10	ENSG00000111432.4	mRNA	11.1975	12.5419	12.3779	11.4027	12.9747	14.9991	14.0951	12.2783	12.9222	13.056	12.6436	12.595	13.188	12.946	12.2367	13.1981	12.985	13.009	11.7684	12.5999	11.3617	11.8623	11.9308	12.6835	12.1861	12.1157	11.6361	12.0474	11.6027	10.5743	12.1715	12.393	12.7961	14.5502	12.9402	11.0065	11.2043	13.4795	12.7793	12.2621	11.4978	12.4513	10.6854	14.0592	11.2627	13.2546	12.1913
FZD4	ENSG00000174804.3	mRNA	15.1838	16.1135	16.0403	16.6799	15.9242	15.466	15.4691	15.5319	15.4529	15.3101	16.1031	15.7387	16.068	16.4467	16.5019	16.1983	15.3276	15.9433	15.6587	17.1094	15.2823	15.6924	15.4082	15.0037	15.9165	15.0825	14.8501	15.4728	14.9352	14.9139	15.918	15.604	15.4319	15.9931	15.8956	15.2704	15.1777	16.2721	15.697	16.5698	16.5667	15.739	14.4558	16.6426	14.7831	16.0498	16.3809
FZD7	ENSG00000155760.2	mRNA	18.9744	16.1845	18.1538	18.0396	17.7655	19.2153	19.6349	19.3124	17.2084	17.4896	17.8513	17.3695	19.4708	17.9829	18.5928	18.2557	18.0884	17.9814	15.473	19.3423	15.9149	15.6913	19.4825	16.6383	19.0387	17.311	19.1099	18.9274	17.6039	18.9183	17.2546	20.1282	20.1436	17.5314	17.3258	19.2751	17.9768	18.1933	16.1206	17.9665	17.0415	18.1415	16.323	18.5556	18.8483	17.1753	17.4055
FZD9	ENSG00000188763.4	mRNA	12.239	13.9852	12.1668	13.7934	14.2058	14.1665	14.5844	14.2721	12.5416	13.2925	14.5477	12.7024	12.0726	13.192	13.006	13.1984	11.7793	13.9073	15.3391	13.5041	15.2375	13.129	12.42	13.7857	12.8009	12.233	14.5792	12.9672	12.0919	11.0634	14.039	11.6761	12.4472	14.4013	14.119	11.4956	12.3713	13.4663	14.1295	12.3643	13.5392	12.6775	12.0672	12.6623	11.124	14.3892	11.252
GADD45G	ENSG00000130222.9	mRNA	16.9725	20.2469	19.0206	17.231	17.1665	17.5956	17.667	15.8642	18.0451	19.8307	16.5846	18.3737	16.0103	17.1844	17.3872	14.8604	17.2007	19.6561	18.6837	17.2206	19.4754	19.0773	19.646	21.1065	16.0717	17.3983	18.6097	17.0785	18.7146	17.644	17.5186	16.7106	16.8544	18.7384	17.8251	17.4781	20.4563	19.4337	19.5697	18.9135	15.3617	17.2077	18.2429	17.0214	17.4977	16.6297	17.638
GAL	ENSG00000069482.6	mRNA	15.2843	15.5312	11.2362	14.9333	14.5401	15.9461	14.5644	18.3427	18.4431	12.9771	16.088	17.0592	13.5821	11.4245	14.9616	13.3822	13.2779	14.8571	16.6443	12.766	15.1867	13.7127	11.682	12.3916	11.3849	10.5779	15.1093	11.6674	13.3535	13.2722	11.9226	18.2752	12.9499	17.7626	11.6442	14.2545	10.219	12.3132	15.8928	11.8327	11.249	17.2392	14.0206	12.8569	12.9032	14.6802	12.7199
GALM	ENSG00000143891.15	mRNA	17.9847	15.7067	16.7465	17.9422	17.8205	17.452	17.15	17.2873	16.6572	16.5729	16.9669	15.9225	17.0461	16.8691	17.0062	16.4502	17.0385	15.949	16.2221	17.7995	14.6093	15.9183	17.4104	16.0249	17.2228	17.5105	16.8754	17.5812	16.8154	17.8364	16.9353	17.8339	17.494	16.8806	16.5599	18.2553	16.9818	16.7555	15.0992	16.7596	17.0463	17.3965	16.0511	17.0011	16.9731	15.4466	16.9843
GALNT1	ENSG00000141429.12	mRNA	18.9921	19.259	18.8639	19.2957	18.8995	18.2056	18.1504	19.0788	18.2242	18.2532	18.4396	18.2459	19.0403	18.1916	19.0116	18.4324	18.2551	18.6013	18.1629	18.557	18.6536	19.3742	18.6042	18.3271	18.4631	19.0724	18.5595	18.6755	18.7826	19.1848	18.4215	18.8363	19.3256	18.0621	18.5348	18.4757	18.2716	18.5329	17.46	18.8642	18.079	18.5258	18.4561	18.5891	18.4048	18.0508	18.4933
GALNT3	ENSG00000115339.12	mRNA	12.4203	11.9668	16.5033	12.7068	13.5801	12.4046	11.7974	12.4857	14.6111	14.297	14.352	13.3553	11.3916	12.4323	14.9742	11.6846	14.8754	12.774	12.7226	11.5014	13.7016	12.1261	14.1926	12.5742	10.7984	14.1195	13.3485	12.5018	12.9367	15.3021	13.2264	14.3209	12.2071	12.1506	13.4494	13.1462	14.2135	15.068	13.3512	14.4935	15.0596	14.8172	11.1189	12.6592	12.4425	14.2036	11.7183
GALNT5	ENSG00000136542.7	mRNA	16.1526	10.225	11.8452	16.4113	14.2217	14.6059	15.0519	16.8553	13.6313	9.51763	15.0232	13.3807	15.2674	14.0666	13.7261	13.289	13.4937	10.5478	11.0924	15.7518	11.6064	11.0005	14.2618	8.86611	9.25894	11.0613	11.067	14.2632	13.3132	13.2964	11.3799	17.2223	12.488	11.8898	13.4389	16.0285	9.73555	13.9101	14.2846	14.7778	11.8214	13.8846	12.7414	12.9318	14.4509	9.3759	9.91531
GALT	ENSG00000213930.10	mRNA	15.9863	15.7385	15.252	16.1823	16.7039	16.4999	16.7269	15.8032	16.9525	16.4195	15.8764	16.0101	15.7626	15.9527	15.9027	15.5515	17.5145	16.362	16.3533	16.0158	16.7031	15.153	15.7206	15.7481	15.6588	16.8138	14.8381	15.8057	16.3282	15.8287	15.3107	15.4487	15.4188	15.4649	15.7455	16.5511	15.6389	17.225	14.8161	15.9923	17.1135	15.9954	14.8051	15.5674	14.8941	16.0033	16.4162
GAMT	ENSG00000130005.10	mRNA	18.3691	18.3393	18.9551	17.9284	19.0379	19.862	19.4251	19.2565	19.5229	19.2759	18.7544	17.4057	18.6775	19.2128	18.2827	19.0441	19.1474	18.0812	19.1594	19.2309	16.2031	17.7023	18.9187	19.5138	20.0988	20.1216	19.2023	18.7607	19.6322	19.3175	19.4816	19.6156	18.1254	18.7173	19.3334	18.5762	17.4619	19.6376	18.1912	18.2697	19.0092	19.1548	19.3619	19.4455	18.7601	18.938	19.374
GARNL3	ENSG00000136895.17	mRNA	13.9417	14.8535	14.5658	13.306	13.8531	14.299	14.2891	13.4947	14.4227	15.7068	15.1593	14.8178	15.0166	14.7249	14.1426	13.9681	14.4008	14.1412	15.7933	13.3718	13.7706	14.3122	14.6431	14.8566	12.6558	14.3318	13.8597	14.3703	14.144	13.5433	13.7073	13.8302	13.9167	14.474	14.6616	14.655	14.5599	14.5921	14.7692	14.5717	15.0501	14.7436	14.1443	13.5374	14.572	14.3342	13.812
GAS1	ENSG00000180447.6	mRNA	19.6966	20.21	19.3478	17.8453	15.6806	17.6473	19.1035	16.9509	19.6246	20.132	17.4697	18.1968	18.6526	20.0541	17.7564	20.0546	17.0285	18.5022	16.3687	17.0149	16.4572	18.6729	17.7069	19.0194	19.7515	16.5223	18.4739	18.6916	19.2976	17.0528	19.4792	16.6021	15.8868	18.9619	18.6919	18.7299	20.4157	17.8176	18.8468	16.9839	18.4028	16.3882	17.9078	19.3327	17.0102	19.7349	19.2173
GATA2	ENSG00000179348.10	mRNA	12.5205	15.042	15.2867	13.1217	13.8643	14.2351	14.5691	14.1963	14.2519	14.3763	13.7962	14.3558	13.9047	13.9312	13.6213	14.4283	13.2882	13.6473	14.1938	15.0189	12.9736	14.9875	13.9278	14.2933	13.7601	14.4993	12.8166	13.6664	13.0083	12.646	13.1442	13.6877	13.0411	14.4753	14.9866	13.2577	16.2389	13.7468	15.849	13.7984	14.2776	13.2485	12.7206	14.2637	12.9615	14.1994	14.249
GATA5	ENSG00000130700.6	mRNA	9.95218	9.61927	0	7.5011	7.46353	9.55845	0	0	8.53684	7.59483	0	10.8301	7.34571	0	0	8.80307	0	0	9.78653	0	0	9.39559	7.23453	0	0	0	0	0	8.03973	8.11011	0	10.4107	7.26149	8.20045	0	0	0	7.41725	7.5112	7.52102	0	0	0	8.47128	0	8.31245	0
GBA2	ENSG00000070610.13	mRNA	18.2209	18.3002	18.5276	18.5485	18.1759	18.2363	19.2455	18.3461	19.3577	19.8736	17.9939	18.6666	17.7962	19.4514	18.5833	18.5312	18.4208	18.9194	18.8692	18.1713	18.6077	18.1545	17.7328	18.3701	18.3153	18.1489	18.3266	18.2802	17.7045	17.8918	19.0164	18.208	17.9213	17.9077	17.9462	18.7882	18.7972	18.6716	18.8101	18.276	20.0505	18.0412	17.6004	18.3896	18.7305	18.9208	19.1861
GBP1	ENSG00000117228.9	mRNA	19.3079	17.1032	19.4577	19.8537	18.4318	19.6098	19.2406	17.3308	17.44	17.8364	18.0165	17.7905	17.3111	19.1262	17.9252	17.7035	19.7544	17.7144	16.4728	18.1498	17.1837	16.9848	18.7286	15.6092	21.1411	18.5287	19.1905	18.6528	19.2471	19.2207	17.1769	18.3817	19.8531	17.6946	18.41	18.2805	16.17	19.745	16.9846	18.8728	17.5533	19.4052	17.3362	17.4891	17.9748	18.9381	18.3572
GCHFR	ENSG00000137880.5	mRNA	16.5749	12.5164	12.8364	15.9126	15.9171	15.1758	14.9689	14.4725	13.6162	13.5582	13.7436	12.5908	13.2275	12.832	14.1341	12.6202	15.0955	11.879	14.8316	14.0906	12.8485	11.7401	13.1563	13.866	14.1485	14.248	13.262	13.4817	14.496	14.7242	12.7569	14.7955	14.8335	12.6009	14.0402	15.2946	11.7896	14.3599	10.8503	12.975	12.1502	13.5512	11.785	12.8725	14.2521	13.1137	13.3714
GCKR	ENSG00000084734.7	mRNA	14.2936	9.82666	11.2413	13.6417	14.9055	12.7384	11.7259	12.9626	13.87	13.0377	13.6741	13.3172	13.1677	12.3191	13.5777	12.7702	12.2066	12.4613	12.4143	12.7838	12.722	11.4381	9.75616	11.117	9.78908	11.418	12.7255	13.7941	11.2165	15.4782	12.9693	13.0065	11.2968	13.5472	13.0914	15.0509	11.3357	11.9387	12.2702	13.6784	12.6059	12.0974	12.1085	11.9447	13.7115	13.2397	12.2523
GDA	ENSG00000119125.15	mRNA	15.3394	11.3331	13.0043	11.5592	12.8931	16.0319	12.0025	10.9305	14.6301	13.4564	16.8619	14.0605	14.4883	14.1906	14.593	11.1936	13.3506	13.286	17.5689	13.4546	11.8194	11.3721	13.4256	13.9646	9.26808	11.4759	13.9765	12.8256	14.891	11.7464	12.7107	12.9994	9.89465	12.2614	13.2725	14.9655	15.4545	10.5034	9.06903	13.2552	9.32462	14.2226	12.0189	11.4756	10.9948	16.4676	13.0793
GDAP1	ENSG00000104381.11	mRNA	16.1608	18.4867	17.5186	15.5645	17.0687	17.4682	16.5459	15.3938	17.06	17.4621	17.5017	17.2121	17.6525	17.4738	17.0773	17.6313	17.6142	17.4367	18.2583	16.8912	16.5166	16.596	16.9219	18.2648	16.5542	16.213	16.965	16.9491	17.1294	16.9875	17.256	16.179	16.6453	17.7523	17.7055	17.4289	18.1241	16.9396	17.0177	17.1111	17.574	17.4868	17.0243	17.523	16.1444	17.8708	16.4957
GDF15	ENSG00000130513.6	mRNA	17.6435	15.2893	17.9303	17.9648	17.9232	16.6123	16.652	19.253	16.8217	16.85	15.557	17.2268	18.637	18.2015	15.6921	16.6815	14.4085	15.0532	15.6991	17.9396	15.0282	15.2313	15.9987	14.2935	17.0053	20.4721	16.9187	17.1396	17.0559	16.6335	17.6004	21.6275	16.2317	17.2138	17.3938	16.5967	14.6435	18.6187	19.9044	16.3392	17.0605	13.3606	19.166	18.5945	18.0745	17.588	18.3978
GFPT2	ENSG00000131459.11	mRNA	20.5258	16.3626	16.8352	20.5488	19.0922	18.3137	19.0439	20.3927	18.8651	16.2929	16.5767	19.1244	18.1689	16.0846	17.7855	16.8824	16.6123	18.5687	16.1642	19.3921	17.4835	17.5863	19.0878	17.9641	15.4832	15.5852	17.9744	18.6641	17.0279	18.6953	16.4118	19.8775	18.5322	17.0199	17.6108	19.1178	17.1555	17.9967	16.7357	19.6883	14.2279	18.4018	16.669	17.7088	18.7618	16.8487	16.0565
GGT1	ENSG00000100031.17	mRNA	15.9408	14.8265	15.007	14.4414	14.8574	14.7379	15.0333	15.2748	15.8045	15.0529	14.3926	14.3566	14.3649	14.8827	14.7765	14.8933	14.8032	15.3923	14.1482	15.871	15.2982	13.6207	14.2976	14.7618	15.175	14.4981	14.5003	14.7549	13.7533	13.9468	14.5852	14.6518	15.4129	15.0951	14.7612	14.9641	13.402	15.1595	14.3154	14.6291	14.6321	15.0807	14.3258	15.0342	14.5609	15.3099	14.9085
GGTLC1	ENSG00000149435.11	mRNA	0	0	0	0	0	0	0	0	0	0	0	0	0	0	0	0	0	8.4418	0	8.47144	0	0	0	0	9.0886	0	0	0	0	0	0	0	8.27743	0	0	9.28024	0	9.4316	0	0	0	0	0	0	0	9.91508	0
GGTLC2	ENSG00000100121.11	mRNA	0	0	0	9.57326	8.53747	0	0	9.48762	0	9.66737	0	9.58747	0	8.50893	0	8.29771	0	0	0	8.52882	10.0792	0	8.30773	0	0	0	8.41311	0	0	0	0	0	8.33478	9.27611	9.40499	0	8.30341	8.49105	0	8.59513	0	8.70165	0	0	8.59547	0	0
GHRL	ENSG00000157017.14	mRNA	12.4829	12.2699	13.4053	14.51	14.6186	13.2089	15.1937	11.9079	13.6182	13.0877	13.9564	12.792	12.8768	13.0051	12.7614	13.3002	13.8885	13.8348	14.1597	14.4209	10.9156	12.309	13.4861	14.02	13.44	11.3256	12.1848	12.5852	13.0651	14.2426	12.3931	12.1553	13.0088	12.9854	13.513	13.3425	13.2235	12.3243	12.6918	13.2011	13.3889	12.7578	11.939	12.5526	12.429	13.1619	13.1233
GKN1	ENSG00000169605.5	mRNA	8.80738	0	0	8.67201	9.63251	0	0	8.58647	0	0	8.57636	0	0	0	0	0	0	0	8.37963	8.62567	0	0	8.40454	0	0	9.17264	8.50995	0	0	0	0	10.0015	0	0	0	8.43672	0	0	0	0	0	0	0	0	0	8.48729	0
GLCCI1	ENSG00000106415.11	mRNA	15.4403	19.2151	17.7845	15.8133	15.7653	15.7782	15.3712	15.2018	16.4267	18.1451	16.1707	17.3097	14.9376	16.4907	17.3854	16.1789	16.7096	18.1174	17.2931	15.6389	17.4653	18.8851	18.2443	17.8818	17.1534	15.1683	16.9137	15.5632	16.0124	15.5332	17.1357	14.8391	16.117	17.3328	16.6431	16.0638	20.5612	17.6937	17.2655	16.5659	15.5102	16.6686	16.4948	16.0411	15.6313	15.9982	17.6683
GLCE	ENSG00000138604.8	mRNA	16.6353	16.6929	16.3975	16.473	15.9771	15.6709	17.0045	16.859	14.6915	15.9241	15.7719	16.4091	17.3372	16.126	16.1971	15.6834	16.0327	16.4157	16.4842	16.6432	16.4697	15.6101	15.8317	17.4441	15.6633	16.1884	16.2205	15.6965	16.4932	17.107	16.2639	15.8766	16.0485	15.8757	15.7395	17.3963	15.6339	14.7629	15.9829	15.8946	15.0395	15.1826	16.9627	16.5765	16.2317	15.7539	15.9284
GLDN	ENSG00000186417.12	mRNA	16.6118	15.2878	15.292	18.3792	18.5863	16.7995	18.7517	16.064	14.6342	14.1037	16.5482	16.5191	15.6021	15.528	18.499	15.0066	17.0094	16.803	17.2308	15.8865	13.9395	15.1124	15.7808	17.1094	14.8804	15.2753	15.818	17.3247	16.0058	14.6552	15.2163	16.2826	16.9907	15.0384	17.1536	15.063	14.823	14.812	14.0976	16.8843	12.9278	14.9663	14.7994	14.8072	15.8091	16.3537	14.8495
GLI2	ENSG00000074047.19	mRNA	13.9297	12.7253	16.7383	14.7183	13.5863	15.8702	14.418	15.947	15.3643	15.9386	16.095	15.9177	15.6834	15.7624	16.6015	15.3019	16.5442	14.4158	12.1467	13.2826	13.7441	13.9467	16.1214	13.9137	15.8561	12.9898	15.5759	13.292	14.1287	14.5227	15.5227	14.2718	16.5971	16.7358	14.7832	14.4061	16.6085	16.4685	14.2942	14.6972	14.1168	14.8281	13.8375	14.4661	14.5398	12.5765	16.4248
GLT8D2	ENSG00000120820.11	mRNA	17.0696	13.2096	12.7697	17.2506	14.9223	14.267	12.3939	17.8799	13.6909	16.4132	15.3017	13.2179	15.085	14.4503	14.0389	15.6391	13.3452	12.99	14.0755	14.0076	14.2656	13.2295	12.9135	12.4589	12.3165	12.1847	13.5817	14.6577	14.7983	13.093	12.6269	15.7196	13.185	12.839	15.3482	14.6237	12.8175	13.8822	13.2138	14.1679	13.3502	13.7618	12.2042	15.8612	13.4276	13.2778	13.0667
GMPR	ENSG00000137198.8	mRNA	16.3097	15.6215	18.3967	16.9584	17.1706	18.916	17.1769	16.2937	19.0717	18.2734	17.2422	16.8122	16.9594	17.399	16.8161	17.91	18.2267	15.8487	17.3554	17.2377	16.0435	16.379	20.9286	17.0887	19.2994	19.2178	19.16	16.6305	18.4586	18.7285	17.2758	17.2344	21.6423	18.5582	19.1931	16.6938	17.3343	18.4701	13.4487	16.7136	16.5346	19.7948	15.2472	18.2743	17.7365	17.1619	18.5597
GNAL	ENSG00000141404.14	mRNA	13.6814	14.5762	12.6714	13.3455	14.4535	14.158	13.0536	12.0091	13.4889	13.2688	13.9093	13.1802	13.2419	13.667	13.0199	13.7366	12.6321	13.7315	15.1451	12.486	15.6371	12.3918	11.4773	12.1395	12.0071	11.8778	12.1364	11.4084	14.3487	14.3969	12.8551	14.726	14.0255	15.6965	13.7516	12.5551	14.4812	12.4346	13.4084	13.7298	12.5669	12.7758	11.8539	13.6658	11.6696	13.8677	11.8884
GNAZ	ENSG00000128266.8	mRNA	16.0464	17.6143	17.8082	16.4881	16.6213	17.4465	17.329	16.097	17.1855	17.2192	17.0522	17.7348	16.5045	17.5566	17.2696	17.2127	16.9643	16.8202	17.9888	17.4378	18.6672	17.0278	18.1846	18.6536	18.6977	16.5817	17.3707	16.8284	16.1342	17.0572	16.8531	16.0176	18.3115	17.8656	17.4246	17.4567	17.3426	16.3942	17.8327	16.6993	16.3779	17.7155	17.8199	17.351	17.1996	18.512	16.8932
GNG2	ENSG00000186469.7	mRNA	16.67	19.6201	18.4769	17.3698	17.9375	17.9869	15.8169	17.6896	17.5652	17.164	17.9443	18.933	17.5416	16.7466	18.3093	19.0263	16.3867	19.2134	19.0268	18.1029	19.9263	16.864	17.5971	19.2841	17.1108	17.8833	17.7971	17.7297	16.9053	18.6606	18.4222	17.1674	16.5525	18.2656	17.9422	18.1983	17.5224	16.9242	18.1077	18.854	18.5512	18.2707	19.4588	18.5	17.2535	19.1462	18.4858
GNG4	ENSG00000168243.9	mRNA	15.8887	19.9712	18.7983	15.1738	15.4504	18.6501	15.9672	14.1048	16.6176	18.6524	16.2224	18.9052	14.8378	16.9209	16.9647	17.2521	17.8148	18.7707	18.737	15.203	18.8724	17.4523	18.1919	19.5876	16.4672	16.1589	17.7249	15.5019	17.2919	15.8222	18.6258	15.7215	18.3573	16.3304	16.4619	16.7437	18.3719	16.9494	17.1557	16.6293	16.5825	17.824	17.2916	16.9881	16.5488	18.9554	16.7235
GNLY	ENSG00000115523.15	mRNA	16.5602	14.2219	14.5551	16.5075	16.3066	13.571	16.0471	13.6817	14.5849	14.6206	11.8645	13.1069	14.5545	13.6527	14.6706	14.1413	18.17	15.4122	13.5664	17.0156	12.1587	12.9674	12.6063	16.5404	13.7144	14.0832	15.5192	16.654	15.7951	15.8544	13.762	11.9839	15.1113	13.3884	12.6762	15.8534	10.6883	14.0208	12.3144	14.5925	14.7069	15.2812	12.5062	11.4821	15.0744	14.3598	13.1895
GNMT	ENSG00000124713.5	mRNA	13.9487	15.0628	14.6134	14.2922	13.9008	14.154	14.0771	12.1425	15.1303	16.9869	13.9207	14.6655	14.0718	14.7022	13.7804	14.5127	14.5991	16.1186	15.2303	13.8515	13.597	14.9908	14.055	14.1171	15.0131	15.4402	13.3066	13.8928	14.3097	14.4248	14.8786	12.9077	13.9199	14.2259	15.433	14.2051	13.744	15.16	14.9686	14.9981	14.7897	14.0654	13.6615	13.9907	14.4328	13.4904	13.32
GNRH1	ENSG00000147437.8	mRNA	14.3167	13.2117	13.1597	15.2115	14.4897	11.1157	13.653	11.6668	14.7497	14.8602	13.2038	14.7383	13.8954	13.6578	12.9511	14.2653	13.0428	13.3679	12.0067	11.5906	14.465	14.0395	12.4841	12.8153	12.8719	11.5538	11.5901	13.006	14.4508	13.2485	14.554	13.6688	14.2864	12.6612	13.9276	14.5162	12.303	13.8981	12.7624	14.049	14.4185	13.3485	11.5823	13.2738	13.5957	13.2241	11.419
GOLGA8A	ENSG00000175265.16	mRNA	16.2298	16.7921	13.6814	17.21	17.5805	14.6532	16.1946	13.3503	18.5913	17.7016	17.0335	16.2956	17.7735	17.2043	16.8826	18.3598	14.2707	18.6197	15.6071	15.3849	14.729	16.603	12.0556	16.0514	16.1186	11.523	13.4435	15.5276	17.2316	14.5838	15.0184	13.5542	14.0429	17.1467	17.0303	16.6537	13.8914	14.4726	16.2508	15.1702	17.8412	15.1686	15.8771	16.0796	15.8623	16.3275	14.9193
GOLIM4	ENSG00000173905.7	mRNA	18.6462	18.8502	19.1575	19.1308	19.0204	18.7685	20.2888	19.9691	19.4131	18.9192	18.9653	19.4185	18.2491	18.1306	19.2611	19.4197	21.0959	19.0572	17.9058	19.9317	18.5942	19.4447	19.1917	18.4522	19.4423	18.5233	19.6473	20.5558	19.3437	20.3556	18.3138	19.3524	19.5239	19.5594	19.6072	19.5607	20.9197	20.6866	20.3723	19.8672	19.9353	19.3563	18.7597	18.834	19.5596	18.8364	19.8397
GPNMB	ENSG00000136235.14	mRNA	19.9809	19.0774	17.4857	20.9783	20.8841	18.1028	20.261	20.4779	17.2754	16.9652	18.9443	19.4548	18.3063	18.2341	19.3943	18.2248	17.4454	17.859	18.8324	18.6108	21.1103	16.9262	18.1887	18.7037	17.3675	19.2797	17.2982	19.5174	18.5859	17.8964	16.3129	20.9775	18.8873	16.3774	18.2959	20.4518	17.6037	18.7784	20.4726	19.9629	16.3835	18.4178	18.2007	17.385	18.8673	18.2619	16.2987
GPR137	ENSG00000173264.12	mRNA	17.7975	18.2262	18.1344	18.3695	18.152	18.7992	18.0785	18.7464	19.0275	18.3745	18.6198	17.6492	18.0579	18.2233	17.9485	17.8304	18.5178	17.9037	18.3508	18.2079	18.7873	18.0225	18.7233	18.5951	18.4007	19.0109	18.3743	18.1443	17.8664	17.6692	18.9407	18.3205	18.5149	18.47	18.6962	17.0238	17.1626	18.7341	19.2315	17.4961	18.3238	18.3558	18.2208	18.3475	18.4085	18.2218	18.1856
GPR146	ENSG00000164849.8	mRNA	12.7024	13.0989	13.6548	12.9905	13.5463	15.0273	15.2883	13.4631	13.1796	13.7627	14.9586	13.9512	14.1507	13.5177	13.0075	13.4227	14.7334	14.0753	14.0033	14.5972	12.803	12.9168	13.8833	14.5086	14.1905	13.7768	13.6315	14.3197	12.6572	12.2804	12.9915	12.7107	13.6262	14.5261	14.4499	13.313	13.2033	14.7685	13.486	14.0492	13.815	13.7621	12.7134	12.2277	15.3008	13.8693	13.5759
GPR176	ENSG00000166073.7	mRNA	18.207	16.8865	16.4624	17.3653	15.7206	18.4504	17.1975	16.2639	15.7475	15.734	16.3818	16.4948	16.1486	16.0177	15.9231	16.1703	16.96	17.5441	16.6726	16.2633	16.6982	17.275	17.6394	17.1964	15.7265	16.7126	15.9572	17.0867	15.8654	17.0216	16.9242	17.7772	16.7482	16.6106	16.9194	14.56	15.9157	16.7837	16.7166	15.942	15.7279	16.7679	16.9467	17.042	17.2121	16.8518	16.1218
GPR179	ENSG00000277399.3	mRNA	9.14455	11.3942	12.0035	6.84896	9.2604	11.4853	8.99572	8.92354	11.5771	9.25492	11.1335	11.8052	9.76921	9.09456	10.8846	11.0507	12.0227	12.6184	12.5435	8.96276	12.7693	12.9068	13.4325	11.4879	9.21829	8.34252	9.92332	10.9612	8.96537	6.46459	9.94784	8.17302	10.4543	9.34839	10.4763	9.84997	12.2507	11.7067	13.3624	12.6115	10.1806	12.4392	9.56118	10.204	10.7156	12.3657	6.75722
GPR37	ENSG00000170775.2	mRNA	15.8649	15.9435	18.8899	16.3613	19.5928	19.0481	19.76	19.5195	18.3186	16.9417	19.422	18.1453	17.7119	17.4742	18.7597	16.4591	19.5874	17.3887	18.846	19.923	15.395	16.7133	19.1902	19.5718	19.3257	18.8742	17.6072	19.5889	18.3905	17.5492	17.8412	19.3574	18.915	18.8342	20.8144	19.6551	19.3414	18.8229	19.1121	18.4657	19.4677	17.7449	17.2494	18.34	19.8148	18.6499	15.8782
GPR84	ENSG00000139572.3	mRNA	16.3705	13.1953	12.9462	16.7085	15.1841	16.5598	15.9228	16.5533	15.4705	14.1419	15.3934	14.2954	16.8137	14.4997	14.9118	14.3929	16.1737	15.8281	14.3905	16.8659	12.5148	13.8261	13.6145	13.9237	15.3528	13.7662	16.3195	17.9539	14.8056	16.9617	14.5028	16.9544	14.998	14.2131	13.5767	15.9106	12.2098	14.2931	12.6034	15.4803	12.6668	16.063	14.7006	12.6705	15.9671	14.0624	14.5138
GPR87	ENSG00000138271.5	mRNA	12.3284	0	8.04842	11.2755	10.0686	0	10.8997	10.0206	0	0	9.59595	0	7.95454	9.04135	7.80135	0	10.1712	0	7.81824	8.06396	8.61515	0	8.83997	0	10.678	8.61038	7.94838	9.47627	10.9688	0	10.5379	14.0514	9.8655	0	8.93945	7.87525	7.8388	8.02623	9.11776	9.71173	8.54498	11.0399	7.83422	9.08177	10.4483	8.92278	0
GPRC5A	ENSG00000013588.5	mRNA	15.6208	12.8326	12.684	14.3804	13.6788	15.7438	13.6548	14.5639	14.4536	12.8402	13.0178	16.0703	16.1411	11.5071	14.3017	13.0449	15.0365	14.4366	13.5098	13.5068	13.7576	12.7365	10.6536	13.4525	9.6874	12.075	14.2365	17.3125	13.4518	16.3749	13.4942	15.7921	16.2519	15.1735	15.267	14.659	11.5196	16.0549	16.41	15.7717	10.3163	15.2131	14.1476	13.2171	16.9179	14.1456	12.4542
GPRC5B	ENSG00000167191.10	mRNA	17.7239	19.3332	20.3342	18.5843	20.003	19.9786	20.1718	19.4781	19.9099	19.7719	20.2965	19.6001	20.3635	20.419	20.1651	20.2189	20.9412	19.8144	20.2805	20.3151	19.5487	20.0693	20.5542	20.3887	20.5844	19.7527	19.8814	20.4127	19.707	19.3675	20.161	18.3034	19.5337	19.9936	20.9821	19.761	20.3506	19.3555	21.2611	20.4658	19.3579	20.514	20.4042	20.417	20.0875	20.3687	19.2885
GPRIN2	ENSG00000204175.5	mRNA	0	0	7.8364	7.89818	10.4403	10.9563	0	0	8.9349	7.99203	0	0	9.73751	7.83206	8.58573	0	10.8059	0	11.4068	0	13.3987	0	0	9.92015	0	8.39807	0	8.26605	9.43532	0	0	0	12.8607	8.59827	0	7.66334	8.62325	8.81101	7.90829	10.4981	8.3327	10.6048	0	9.45324	10.2356	0	0
GPX4	ENSG00000167468.15	mRNA	21.2058	21.6895	21.3284	21.5045	21.9053	21.5701	22.0165	21.031	21.7508	22.356	21.5456	20.4447	20.546	21.5872	20.4704	20.7949	20.8286	21.0534	21.7008	21.5643	21.4699	20.3885	20.9928	21.9243	21.3121	22.5911	21.3659	21.4301	22.6133	22.3782	21.544	21.2783	20.615	20.6303	21.5701	21.2141	20.3451	21.5184	21.4366	21.0026	21.2272	21.529	21.6975	21.4827	21.3829	21.1508	20.8338
GRAMD1B	ENSG00000023171.13	mRNA	14.7386	15.3062	16.1605	14.8308	16.5567	16.1557	15.6951	15.3866	15.7144	13.8397	16.548	15.0866	16.1107	14.9299	15.8383	14.5969	15.93	15.8308	16.5149	16.167	14.5258	14.7288	17.1059	15.5729	15.3887	14.1321	14.4868	15.5385	14.9193	14.541	13.778	14.8399	15.2613	16.5526	16.5034	15.7326	16.9782	15.6773	15.4564	15.7247	16.7136	15.2052	13.246	14.7786	15.4243	16.7833	14.8166
GRAP	ENSG00000154016.12	mRNA	11.9543	14.0131	13.3212	13.0915	13.2181	12.7564	14.7277	13.1477	14.2274	14.4257	13.597	13.8624	13.8453	14.2545	14.2087	13.9552	13.7709	14.234	13.3665	14.6381	12.325	13.6573	12.4889	13.3189	13.2319	13.983	12.7435	13.2174	11.8623	13.2715	13.2261	12.4721	12.6072	14.2757	13.2744	12.9976	11.5462	13.9693	12.67	13.8973	14.6002	13.836	13.5109	13.5651	11.7136	14.4994	14.0716
GRB14	ENSG00000115290.8	mRNA	13.6688	14.7791	17.2715	12.9191	14.7422	13.3678	13.7003	13.4854	16.5314	16.6055	15.0413	15.1577	13.2566	14.6302	15.8302	15.1501	12.6622	17.3353	15.3509	13.1648	16.4937	14.012	14.583	15.4253	12.3361	12.7603	13.4273	12.8831	15.5249	12.8704	15.2471	14.8356	13.4208	11.651	15.1245	14.8431	12.7598	13.7592	15.7449	14.2785	14.9302	13.6406	12.7277	14.0598	12.6102	15.0848	9.53553
GRB7	ENSG00000141738.12	mRNA	11.7431	6.83712	10.2831	9.83099	10.985	13.8405	10.3317	9.74533	12.3476	8.12148	9.73521	9.62308	9.45278	6.96723	8.30145	9.33102	14.4725	8.94879	10.1895	6.98701	9.53046	8.92535	8.34327	9.05132	8.5979	7.53154	8.86267	0	10.1494	9.9572	9.71871	12.8133	14.6265	9.53378	10.8543	8.37545	9.7512	12.2956	8.62084	9.04482	11.4587	10.3199	7.75163	9.583	11.7433	8.84	7.93539
GRID2IP	ENSG00000215045.7	mRNA	10.5429	11.0838	12.3445	9.99265	12.1762	12.3444	11.3934	10.5439	12.744	12.1253	12.152	13.4795	12.8747	11.5627	12.7968	11.5879	13.0881	13.3151	12.2009	10.2355	12.7203	11.0443	12.9283	12.6894	12.2517	11.9083	12.303	12.0978	11.8223	10.8933	13.2534	10.1542	10.9029	12.899	10.9755	12.5398	13.8435	13.4786	11.4758	12.9076	12.1157	11.8554	12.8842	11.7958	11.486	12.8261	13.2987
GRIN2D	ENSG00000105464.3	mRNA	13.3286	16.5014	15.7228	13.5865	14.5487	16.6765	14.7596	14.064	14.3284	15.0026	14.3961	15.5625	15.9301	13.8377	15.484	14.9039	15.1183	15.817	15.5056	14.7547	14.0713	11.743	13.1592	16.5563	13.5188	12.9291	16.2096	15.835	12.9685	11.7764	15.3133	13.5386	14.3292	17.5615	15.434	14.1854	15.2337	15.8067	13.7303	14.7499	15.2557	14.9187	15.1105	14.5334	12.9503	14.9682	15.9976
GSDMC	ENSG00000147697.7	mRNA	11.2596	9.92721	10.8397	11.7758	12.6707	13.08	9.88904	11.2308	13.1373	8.41445	12.6126	10.1388	11.9674	10.5725	10.177	7.04868	14.1359	9.24217	11.6671	11.2701	12.7768	13.2165	13.1565	11.4585	0	10.1409	0	11.4931	11.8575	11.0983	10.8862	12.4027	10.6608	13.1885	0	11.9384	11.292	13.8756	11.4966	12.1437	9.33927	15.3132	10.21	10.7503	12.144	0	10.2246
GSN	ENSG00000148180.15	mRNA	20.4521	18.806	18.3389	20.0152	19.8767	20.2049	20.8869	21.7687	19.0362	18.4634	20.3169	18.4929	19.2758	18.1008	19.3623	17.7859	20.0874	18.995	19.9541	19.6456	19.3117	18.4136	19.7136	20.1655	17.3965	19.6447	19.1752	19.4315	18.9349	18.5808	18.1713	20.4776	20.8694	18.6733	20.9052	18.8796	18.8104	19.7262	19.74	19.5722	19.6133	19.6064	18.2329	19.6726	20.837	19.565	18.5135
GSTK1	ENSG00000197448.12	mRNA	19.281	17.945	19.2242	19.748	20.2737	19.1787	19.9386	20.0641	19.8772	19.5978	19.4707	18.6502	19.5561	19.984	19.7562	18.7821	19.3184	18.8879	18.8737	19.9537	18.8911	18.0599	19.5357	18.6625	20.325	20.0787	20.2768	19.3327	19.3243	19.9603	19.7549	19.4148	19.1189	19.0692	18.7625	20.032	19.2924	19.3038	18.5602	19.4974	19.7399	19.4696	19.501	18.9513	19.6637	18.5124	20.0052
GSTO2	ENSG00000065621.13	mRNA	12.0694	10.9161	11.8717	11.4658	13.9301	12.7513	12.6326	10.1178	11.4813	12.0105	13.9978	11.9128	12.2479	11.9842	11.4582	11.566	14.423	11.6921	13.2766	11.0975	13.5325	11.1598	11.3782	12.7946	8.94078	11.4868	11.2791	11.2857	11.9825	11.7555	10.6235	11.02	12.6395	10.654	11.8821	10.967	12.2861	12.7962	11.2415	12.8074	11.6953	11.8754	9.9831	10.9594	11.6236	13.5827	11.1103
GYG2	ENSG00000056998.17	mRNA	16.7548	15.7621	18.3472	12.8854	16.6513	19.273	16.0819	15.1311	17.2482	16.9992	18.0996	17.3655	16.9574	16.1841	17.8679	16.3985	17.3258	14.7906	17.0855	16.0594	14.6383	15.3458	18.2783	15.8278	16.9777	18.0472	18.4165	17.5023	17.138	17.9991	18.2533	15.8577	15.0879	18.9028	18.6446	17.1781	18.0793	18.268	17.2148	17.6835	16.5208	19.2408	16.9041	17.0454	15.7911	17.6174	16.968
H2AFJ	ENSG00000246705.4	mRNA	17.4842	15.6694	15.8283	17.1235	17.6889	16.6285	17.3507	17.508	16.883	16.9203	16.4164	16.3063	16.7455	16.0444	15.8564	16.0606	16.7185	15.8565	16.8034	17.0785	18.6335	14.8805	14.9677	17.2519	16.3596	16.4279	16.7605	17.1638	16.6203	17.3486	16.8001	16.6136	18.3854	16.5677	16.333	17.258	16.2717	16.3821	15.3991	16.6179	16.2793	17.3337	15.2373	16.6943	16.2536	16.0376	15.9244
HDX	ENSG00000165259.12	mRNA	14.4579	14.7746	14.881	14.1642	13.4554	14.1602	14.0403	13.4314	13.4501	14.0045	14.118	14.7171	14.0478	14.3049	14.1171	14.6736	14.2402	14.4528	14.2631	14.0018	14.3167	14.9431	14.6719	14.3027	14.4943	13.5223	14.3782	14.1924	14.6746	14.6435	13.4503	13.992	14.2997	14.247	13.7597	14.297	14.7564	13.8499	14.2816	13.9542	13.4228	13.7061	14.1876	13.8352	14.1642	14.1729	15.069
HEATR4	ENSG00000187105.7	mRNA	11.391	9.1852	11.7337	11.7958	12.1842	11.1813	11.7366	9.71134	13.4052	12.7478	12.7221	12.1675	12.3118	12.8584	12.6753	12.7072	12.9815	11.1792	11.9288	10.9196	12.624	10.6966	10.9202	10.9381	10.3686	8.88506	10.8036	11.75	11.1445	11.2151	12.4292	10.2981	12.2825	11.6682	12.797	12.5139	11.8086	12.94	9.80713	11.8602	11.6913	10.2453	9.52021	11.1624	11.2758	11.82	11.5106
HEATR5A	ENSG00000129493.13	mRNA	15.2311	15.5519	16.3601	15.6531	15.7541	16.0104	15.4443	14.9869	15.9794	16.3225	16.6542	16.1329	16.3679	16.3369	16.9347	16.9206	16.48	16.4262	15.2318	15.9078	15.3042	16.7435	17.1932	15.1413	16.5201	15.5018	16.4119	16.4861	16.6032	16.9695	16.2625	15.8773	16.0034	16.2034	15.9548	16.1765	15.9938	15.5941	15.9508	17.1397	15.3147	16.3036	16.5148	16.4442	15.8557	15.5997	16.2947
HEBP1	ENSG00000013583.7	mRNA	17.7768	17.163	17.5501	17.9467	18.1399	18.1852	18.721	17.9963	18.1637	16.9129	18.1041	16.4082	18.121	17.1186	17.3893	16.3407	17.9015	16.4017	17.4145	18.1876	17.5708	14.8189	17.6676	17.493	17.3839	17.3914	17.418	18.237	17.5997	18.3313	17.5782	18.3188	18.6782	17.6382	17.9792	17.8741	16.4018	17.6178	14.754	17.5793	17.6753	18.5059	16.9834	17.6085	17.4668	16.8311	16.7141
HEBP2	ENSG00000051620.9	mRNA	17.21	15.9526	16.1632	16.022	16.2002	16.4333	15.6998	15.7639	16.4044	16.8231	16.5805	15.9885	15.7976	16.1139	15.9278	16.459	15.67	15.3701	16.4548	16.6305	17.0405	15.5364	15.6949	15.2934	15.9573	17.8785	15.4175	16.6859	17.2932	17.303	15.5665	17.2611	15.4551	15.4084	16.3669	16.4516	14.4672	16.1536	16.0035	16.0469	16.8312	15.7396	16.0331	16.3707	15.8218	16.1591	15.9097
HELZ2	ENSG00000130589.15	mRNA	16.4138	14.9426	16.566	16.7293	14.8194	16.9615	16.1612	15.826	15.9651	15.3128	15.7585	15.9785	15.973	16.9303	15.1194	16.7713	17.2613	15.3483	13.9829	15.5265	15.4227	14.5858	15.6244	14.9891	18.2221	15.2494	15.8625	16.2414	16.0567	14.2887	16.4304	16.0212	16.651	15.9106	15.664	15.322	14.8877	16.517	14.8503	16.161	16.5323	16.8343	15.6871	15.6488	16.4694	15.7463	17.5789
HENMT1	ENSG00000162639.14	mRNA	14.5462	14.6965	14.2965	17.3944	15.9704	15.0461	15.3842	14.714	14.3026	14.7289	15.8651	13.9796	14.3882	14.5352	14.9168	13.7551	14.9333	15.158	16.7728	16.8338	17.8365	13.4907	14.2879	15.0206	13.1625	14.6156	14.196	14.805	14.8179	15.4212	14.0579	14.6901	14.2918	12.7847	14.1767	16.6718	14.272	13.6959	13.4079	14.3246	13.1964	14.8464	13.9279	14.5644	13.7605	14.653	14.0676
HES6	ENSG00000144485.9	mRNA	17.5983	22.4091	20.9426	15.8311	18.8374	20.017	19.1265	16.0281	21.1757	21.4537	19.2464	19.4083	17.4838	18.7112	19.7178	19.8168	20.4522	21.3471	20.011	17.8072	21.1143	21.082	21.0926	21.8659	20.8958	21.0701	19.6633	17.2615	20.1161	19.7806	21.3434	17.9668	19.3156	19.5581	19.8083	18.2531	22.4715	20.705	20.9007	19.4394	18.2428	20.4127	20.4418	19.4224	18.443	19.1881	20.6336
HEXIM1	ENSG00000186834.3	mRNA	17.2559	18.0485	18.1609	17.3178	18.2823	18.177	17.8809	17.433	18.564	17.8345	17.7759	17.7824	18.2456	17.7259	17.958	18.6829	18.4167	18.0525	17.4505	18.094	17.9734	17.938	18.457	17.3633	18.1798	17.8512	17.6108	19.3392	17.8063	18.0547	18.371	18.6574	17.9371	17.7772	18.3542	17.5818	18.1406	18.661	18.7427	18.1435	18.751	17.9307	18.2746	18.8424	17.994	17.7855	17.8109
HHAT	ENSG00000054392.11	mRNA	15.0113	13.1099	14.1682	14.9254	14.3989	14.9953	13.8989	14.8462	14.4158	13.4986	15.1501	12.1964	15.3343	12.1158	13.6412	13.8593	15.408	13.6761	14.2237	14.5749	13.3855	12.286	14.24	13.4371	14.6754	14.5758	14.1796	14.165	14.3007	15.2451	14.0677	15.4145	13.9354	13.7165	14.8145	14.7154	14.9418	15.1406	12.5054	14.1688	14.7831	13.819	11.4458	13.5955	15.6696	14.2922	14.1377
HHEX	ENSG00000152804.9	mRNA	15.8826	16.0932	15.6897	17.1872	17.0609	15.8628	17.0009	15.5129	15.8898	16.2005	16.2213	15.2542	15.6846	15.747	16.049	15.8355	16.3282	16.267	15.707	16.9476	14.5469	15.1054	15.8342	15.4336	15.4356	16.3104	15.2156	16.1872	15.636	16.7701	14.5615	16.2736	15.1181	15.195	15.7564	16.1885	13.7837	14.8406	15.4616	15.7572	14.683	15.8293	14.9137	15.5179	15.1823	15.8943	15.2474
HHLA3	ENSG00000197568.12	mRNA	17.8827	17.4427	17.5701	17.6376	18.4457	18.1899	18.9617	18.103	18.4523	17.6105	18.3816	17.3521	18.0599	18.0774	17.9259	17.307	18.7933	16.6883	17.5056	18.1716	18.4848	17.8808	18.7069	17.9519	17.6315	19.1514	18.0895	17.8737	18.5001	18.4582	18.2613	18.1496	18.8864	17.6174	18.8034	18.7939	18.1682	18.9455	18.2815	18.4638	18.7723	18.9024	17.6244	18.0909	18.8854	16.9794	17.4296
HIF1A	ENSG00000100644.15	mRNA	20.882	20.119	20.8463	20.499	20.9674	20.9797	20.8567	19.7707	19.4152	19.1475	20.1503	20.3986	20.6324	20.2496	20.2304	20.9697	20.7944	20.0477	19.0224	21.2966	19.9151	20.5362	19.5667	20.136	20.5966	20.0197	19.9559	21.1845	20.4429	20.3786	19.9509	21.2996	19.9175	20.6345	20.0929	21.0881	19.7159	19.9862	21.3077	20.0906	19.5617	19.6988	20.3902	20.0895	21.6125	20.9408	20.4619
HIP1	ENSG00000127946.15	mRNA	16.9409	17.9004	18.8268	17.8823	17.3791	18.3819	17.0014	18.2731	17.3369	18.8898	18.2338	18.0889	18.5198	19.1032	19.493	17.2722	17.9204	18.3344	17.7651	17.2035	18.1802	18.3906	19.4028	17.693	19.1323	17.6985	19.4196	18.3565	16.9644	17.4913	19.2335	17.9306	17.9799	19.562	18.5717	17.0949	19.8357	17.9469	17.7552	18.4124	18.4352	18.308	19.4301	18.0801	17.9089	17.5684	20.3397
HIPK2	ENSG00000064393.14	mRNA	18.0366	17.3781	17.9807	17.1363	17.5339	17.6877	16.909	17.2052	17.8512	17.7361	18.7852	18.503	17.9803	17.2721	18.7758	17.5094	17.3037	18.7764	18.4025	16.9011	17.032	18.1997	18.2278	18.1923	17.8764	16.9968	18.4659	18.1186	15.8944	15.8405	17.7113	18.0676	17.6959	18.4478	18.9968	17.4306	19.1391	17.0247	18.1414	18.9254	18.5835	18.2224	17.8032	17.2683	17.4559	18.0778	17.9461
HIST1H2AB	ENSG00000278463.1	mRNA	10.353	13.1887	11.1548	10.2175	11.7638	0	11.7882	11.1311	10.2573	0	0	11.2311	0	10.1511	0	0	10.96	11.1407	13.2451	13.8703	13.8927	0	10.9488	15.1173	13.3735	14.1774	11.0544	0	13.3425	10.8288	11.3268	10.5488	12.5604	11.5041	0	9.98176	0	12.4541	0	12.2366	10.6532	12.3433	10.9399	11.191	11.822	10.0324	12.124
HIST1H2AC	ENSG00000180573.9	mRNA	18.9103	18.6997	18.2999	19.113	20.2957	18.9187	20.4398	18.6365	17.1536	16.8137	18.8975	18.5124	18.549	18.1237	18.7528	16.6371	18.5293	18.7498	19.5574	18.5781	18.1705	19.2551	19.4657	19.4739	20.7151	19.3518	20.1716	18.1402	20.0929	20.3466	19.1103	18.9542	19.211	17.3606	18.6329	20.3522	16.9026	17.7399	18.9824	19.5312	18.4632	19.8621	17.5917	16.6594	19.0603	16.9845	19.0154
HIST1H2AG	ENSG00000196787.3	mRNA	13.3893	13.7493	11.8852	14.6178	16.1041	13.9324	12.6399	14.1368	13.3536	12.3784	14.6365	14.6321	14.4969	13.1562	13.8151	12.1214	14.1003	13.4042	15.3246	12.7401	16.1712	14.7692	14.5497	14.7553	14.3586	13.1549	14.5809	13.4945	15.3275	13.0113	13.7632	13.6454	15.6963	13.956	13.5749	13.9388	12.8189	14.3151	13.5918	14.6259	12.7791	15.8865	13.7617	12.9586	15.6793	12.9062	13.5607
HIST1H2AI	ENSG00000196747.4	mRNA	13.581	12.6628	10.799	13.1823	13.91	11.924	9.84836	13.3596	12.4853	11.5399	0	10.8752	9.70565	11.3793	9.552	10.5829	12.6035	11.7844	14.6546	12.399	13.6887	13.7607	11.5925	15.5872	12.0176	11.9472	12.283	0	13.7234	12.0573	9.97163	11.1924	15.1428	12.1479	0	12.4319	10.5886	11.7763	14.1924	11.8806	12.2966	13.3091	9.58497	12.1566	13.7876	11.2606	11.3532
HIST1H2AJ	ENSG00000276368.1	mRNA	10.3752	11.6263	10.1776	13.2386	12.5228	0	0	11.7381	10.2794	0	0	11.2533	0	0	0	0	11.9818	0	11.5307	10.1932	11.7453	12.1391	0	15.3239	0	10.741	0	0	0	0	12.3487	0	12.8049	10.9416	11.0706	11.588	0	12.1544	10.2498	0	0	0	10.962	11.2131	12.581	11.0539	13.6054
HIST1H2AM	ENSG00000278677.1	mRNA	13.1594	14.411	12.1545	11.2169	14.7021	0	13.0103	13.59	11.2567	12.6326	11.7058	13.2306	0	11.1505	10.9069	12.9382	12.7669	12.1404	13.7305	13.1699	14.8102	14.4386	12.9482	15.3583	13.5958	12.7181	13.3758	10.5864	12.7576	10.8288	12.6484	12.87	14.8821	12.2409	12.6329	13.3024	11.5292	13.717	12.5486	11.8216	12.6526	13.9281	11.9395	11.7757	14.0441	11.6165	11.7091
HIST1H2BD	ENSG00000158373.8	mRNA	16.2372	17.3134	16.3984	17.564	17.4355	16.9644	18.4767	17.7137	15.7518	14.9437	16.6304	16.8439	16.5913	15.3416	16.8454	14.9192	16.828	16.9749	17.6997	16.97	18.2888	16.5534	18.0478	17.7765	19.2841	17.524	17.9663	16.4597	16.7891	17.8245	17.979	16.7573	18.2407	16.1629	16.5435	17.6428	15.603	16.823	18.0698	16.843	16.47	18.6686	15.7335	15.3998	18.2931	15.1309	16.9413
HIST1H2BH	ENSG00000275713.1	mRNA	14.9817	12.8709	16.8137	15.0684	14.8082	15.4944	13.7071	15.6347	13.7604	16.0832	13.1653	14.1822	13.2748	15.48	14.1208	13.3048	14.3964	14.7084	14.922	16.4625	15.4679	13.7464	14.7477	16.8924	15.74	15.6696	13.6836	12.9523	15.8021	14.1948	14.2779	14.5927	15.5118	13.423	13.0926	15.9077	13.5735	15.0836	15.0261	14.866	14.2821	15.0317	15.5688	14.8201	15.0888	14.3978	16.8549
HIST1H2BJ	ENSG00000124635.8	mRNA	14.9115	14.7677	13.6883	15.6294	16.3808	15.0063	13.63	15.3649	14.4746	13.2852	15.0368	14.9571	14.7408	14.3028	15.0757	13.0571	15.5188	14.2243	17.5775	14.451	15.9729	15.0911	15.7621	16.0569	16.0541	15.6344	15.8784	14.1701	15.6738	15.4373	14.7808	15.2052	17.47	13.7747	14.2339	15.5014	12.9184	15.4879	14.7859	15.9629	13.549	15.8246	14.7102	14.0463	16.471	13.4582	14.9378
HIST1H2BK	ENSG00000197903.7	mRNA	19.5988	19.094	17.3789	20.268	20.5474	19.0109	21.0436	19.8705	17.6671	17.704	18.6729	18.389	18.8662	18.2821	18.17	18.1627	19.0674	18.8323	20.0081	19.2452	18.6316	17.7463	18.6403	19.1742	20.3742	19.9276	20.2057	18.7543	19.2326	18.8035	19.354	19.5841	20.7512	17.6981	19.2724	19.4217	17.1584	18.543	19.2768	19.2381	18.0721	19.3878	17.7652	17.4249	20.4068	17.2656	18.8479
HIST1H2BL	ENSG00000185130.5	mRNA	11.0403	12.2915	11.8422	12.4891	11.4516	0	10.8912	12.9882	9.94519	12.5833	9.80961	9.91962	11.3331	9.83907	11.1793	9.62748	11.6474	10.8285	12.6109	11.8578	12.9955	12.8044	9.63751	15.046	12.0613	12.7277	12.3267	10.2743	12.0303	0	10.0153	11.8209	12.833	10.6072	10.7362	11.6684	10.6323	11.82	13.2361	12.5091	12.3403	12.8383	9.62859	12.8782	13.5094	11.3042	12.3966
HIST1H2BM	ENSG00000273703.1	mRNA	10.3977	10.0647	10.2002	11.2616	10.2244	12.3247	11.2482	10.1765	0	0	10.1664	14.1822	0	10.1958	0	9.98417	11.0047	10.186	11.5532	10.2157	13.0895	0	0	15.51	10.8339	10.7635	10.0998	10.6311	0	0	10.3721	0	13.0201	11.5489	0	11.0258	9.98987	11.1773	11.2717	0	0	0	0	12.2354	11.2819	10.0771	10.1697
HIST1H3G	ENSG00000273983.1	mRNA	8.73828	7.41011	10.8599	10.77	12.3691	11.6631	13.0778	12.3211	10.64	10.5018	12.9629	10.7842	10.9031	10.1191	10.7493	10.1296	12.0975	10.6938	13.906	12.4599	13.1058	0	11.6534	13.7688	12.9789	11.9086	12.7945	10.7766	13.0474	11.3814	11.9575	9.51776	13.4244	10.7619	10.0171	12.451	10.3278	11.6853	10.4178	11.2048	10.3583	13.1185	11.2296	10.7441	13.1433	11.1151	12.1508
HIST1H3H	ENSG00000278828.1	mRNA	14.5051	15.799	12.8221	15.162	16.2385	14.3259	15.9495	14.4763	13.6463	12.4638	13.2736	14.726	13.0497	14.303	13.3813	13.8384	14.8901	13.5303	15.5817	14.0075	15.6978	14.7103	14.9521	15.1935	15.0884	14.193	15.1	13.1013	15.8036	13.9812	13.579	14.1416	16.3378	14.0459	13.9172	15.1463	13.2896	14.7065	14.839	15.2114	14.1681	15.7441	13.143	13.5806	15.5597	13.0208	14.1134
HIST1H4E	ENSG00000276966.1	mRNA	15.5918	15.2585	14.6572	13.7193	15.7969	14.1977	15.7058	14.2709	14.2896	14.344	13.6234	15.7334	13.978	13.2903	13.5611	13.2711	14.0997	14.795	15.3435	14.8248	15.0557	16.537	12.6032	18.2669	15.2089	15.7514	15.0306	14.8254	15.5498	13.7461	14.3597	14.4659	15.8318	13.4217	14.7027	15.4426	13.0842	14.1654	15.917	13.3768	14.9854	16.1023	13.7316	15.1672	15.5696	15.3641	13.0418
HIST1H4J	ENSG00000197238.4	mRNA	15.3815	13.5535	15.6219	12.8768	15.1608	13.9401	12.2785	13.206	14.1389	14.4734	10.1969	13.6279	12.9428	14.2253	10.9822	12.3356	14.2047	13.2156	13.1685	15.1521	14.2576	12.1922	11.0241	14.7332	13.8638	14.3783	12.9367	12.9829	11.8331	15.427	11.4021	12.2085	12.0509	11.9944	0	13.7562	12.6043	13.0148	10.3029	13.7712	13.8977	12.7406	14.1845	13.0732	12.6341	13.1066	14.0065
HIST2H2BE	ENSG00000184678.9	mRNA	17.1113	19.2109	17.6121	18.1591	19.2964	18.1696	20.0911	17.8736	16.5137	16.8636	18.2849	17.6797	18.3135	17.3003	18.5239	16.89	18.092	18.4469	19.0486	18.3959	18.645	19.2259	18.0187	18.2015	18.3199	17.4657	19.6567	17.4061	18.1762	16.8042	18.8297	17.6553	18.2636	18.2397	18.838	19.179	17.2965	17.4107	18.2515	19.1812	17.5591	18.7582	17.8184	16.711	18.9673	17.3559	17.5886
HIST2H2BF	ENSG00000203814.6	mRNA	11.2358	12.6956	11.9889	13.0996	13.5125	12.7157	14.2345	12.1946	11.0405	10.988	12.5232	12.8794	12.6215	11.519	13.1114	11.3743	13.2212	12.3261	12.9657	13.0043	13.3716	13.415	12.4165	13.1262	12.8524	12.9039	12.6153	10.5628	12.7339	12.1266	12.3472	11.984	13.733	12.8952	12.8316	13.6982	12.0903	13.1528	10.7885	13.3827	12.2139	13.0475	11.5009	10.4896	14.1788	11.5928	11.8009
HLX	ENSG00000136630.12	mRNA	15.6611	15.636	13.8683	15.2415	15.4071	15.3622	15.3433	15.017	14.9236	15.2404	14.8721	14.1505	14.5561	14.6724	14.0804	15.1122	14.266	14.9465	14.365	16.1111	14.0644	13.0759	14.5877	14.0858	13.555	14.2007	14.4488	16.3793	13.9537	14.3636	14.5442	15.3144	13.6269	14.3373	14.9343	14.4809	13.903	14.9276	15.2269	15.7346	14.3816	15.2126	14.0568	15.0217	13.5075	14.2914	13.9122
HMX3	ENSG00000188620.9	mRNA	14.6324	10.0274	0	8.64226	0	0	9.62704	8.55673	0	0	0	0	0	0	0	9.94683	8.38601	8.56626	10.9312	0	0	10.5399	11.5409	9.08289	10.212	9.14287	0	11.0086	0	0	0	8.97313	0	8.34551	9.47218	12.7953	0	0	14.6932	10.2448	0	0	8.3659	0	0	11.2614	0
HNMT	ENSG00000150540.12	mRNA	18.1455	17.3057	17.8947	18.5791	19.1974	18.3082	18.1526	17.6334	18.5465	17.0068	18.97	17.9592	17.6704	16.5625	18.0211	18.3256	19.489	17.5653	18.0674	18.3445	16.9663	19.2456	20.2226	18.5083	18.8378	18.9694	18.3518	17.7771	18.8507	20.2773	16.6554	18.0941	17.7933	17.5593	18.1257	18.893	18.7707	17.6698	18.1814	18.3322	18.2598	18.9696	18.1085	17.291	18.0042	17.9609	17.7523
HOOK1	ENSG00000134709.9	mRNA	11.4184	7.50755	10.5106	10.8135	13.4496	12.9307	12.2077	8.61514	9.96089	11.0651	12.6459	11.7119	11.0011	11.2944	11.3572	10.6929	11.8557	10.6219	13.7617	9.97412	12.5258	8.01816	9.30577	9.8773	0	8.6176	9.75879	9.80503	11.2978	9.72572	9.92416	11.7297	7.46435	9.81627	10.8514	12.8652	12.4693	9.48937	11.6774	10.3034	12.9409	8.82721	7.42848	10.6108	8.94292	13.1751	10.0211
HOPX	ENSG00000171476.20	mRNA	18.1269	16.0883	18.1159	15.2562	20.3467	18.5109	20.738	18.5518	20.8108	18.8841	21.0257	22.2828	20.683	21.5794	20.0906	18.3162	16.7002	16.7723	19.8884	19.704	20.0418	19.6011	16.5008	18.1814	20.4502	23.8815	18.2712	18.8702	22.0501	17.2435	20.335	16.0271	16.2896	19.838	20.6143	20.4809	17.4968	19.3575	15.858	18.0637	21.4906	17.5993	19.7773	20.7557	20.0164	19.0275	20.0077
HOXA10	ENSG00000253293.4	mRNA	14.5573	15.7206	16.7807	14.2455	13.4004	13.5016	16.5651	11.9807	15.3085	11.8281	9.20708	12.7479	15.193	9.49915	17.0326	13.5334	10.4231	17.0885	15.0605	13.1418	11.293	15.8097	15.1658	10.0065	16.4425	13.2353	13.1017	13.4141	13.7677	13.9828	13.0887	15.9323	10.439	15.5203	13.8763	16.2915	17.7922	12.2869	12.4809	14.5685	14.129	9.10803	11.9872	14.8354	9.58581	15.5911	16.9972
HOXA11	ENSG00000005073.5	mRNA	13.6315	14.2202	13.3558	11.6633	8.6287	12.5339	10.8201	12.101	13.1947	12.4578	9.56884	10.9997	12.3648	9.91985	14.6007	11.3851	9.408	16.3247	12.7622	7.62371	9.17179	14.6925	14.109	9.69112	11.8203	9.16701	12.2011	13.0322	0	14.8445	13.3877	13.1239	11.3292	12.6509	14.018	13.3339	15.4564	9.16598	11.9953	13.4109	11.7998	9.37678	12.0299	11.6374	9.68496	13.2851	16.082
HOXA13	ENSG00000106031.7	mRNA	11.359	14.8561	11.9201	10.845	9.29419	11.3936	11.7947	9.24629	12.3438	11.261	7.43479	8.54043	6.38341	7.46411	12.9672	9.41611	10.0741	15.2885	12.9017	9.28553	10.0302	15.7802	13.1123	7.96967	13.7239	0	12.004	13.284	12.49	8.72247	13.1082	10.7617	0	12.4729	8.94172	12.2174	14.4835	8.44215	12.7026	14.8139	11.5439	12.1089	13.6116	10.8191	6.55809	13.268	14.5331
HOXA2	ENSG00000105996.6	mRNA	11.7075	13.3963	17.2011	11.6593	12.7817	14.2787	14.7964	10.8083	14.7912	9.98895	9.79902	15.5398	14.2096	10.0912	16.767	12.5788	9.90088	16.4667	12.8633	12.1102	10.4008	11.4722	15.6296	15.1215	12.3137	15.9248	12.4966	12.895	12.6977	13.7682	13.1409	13.6035	10.1389	15.5312	12.725	12.6576	16.5396	12.4415	13.4396	14.4244	13.9144	9.28546	12.5039	12.6332	13.0182	11.2936	14.3857
HOXA9	ENSG00000078399.14	mRNA	11.4062	11.9307	16.6067	9.5938	12.0399	12.5036	12.8417	10.1855	14.9172	8.95212	0	11.1917	13.0912	0	15.5892	10.5777	9.01584	14.3334	11.9314	10.3945	8.77975	12.4925	13.6458	7.71846	11.8425	11.0943	9.43154	10.81	10.9818	12.3415	11.468	12.3568	9.35308	10.9731	11.5614	11.9413	15.2118	7.19556	7.28941	11.1975	11.1662	8.98464	10.801	10.2453	9.61415	12.9676	15.3673
HOXB3	ENSG00000120093.10	mRNA	16.5177	13.7387	18.5914	16.6526	13.647	13.3559	10.2062	14.7365	17.1569	16.4079	10.5194	17.646	17.2571	15.692	13.0951	16.077	11.1065	9.89577	11.6777	15.8912	12.2586	12.119	15.568	11.6604	16.527	15.7459	15.4804	14.1079	16.2275	16.3169	13.8421	13.6597	9.63809	14.7008	14.6094	15.9718	18.0678	13.0662	11.9117	15.3957	13.773	10.6217	16.3327	15.2529	16.9164	12.1779	15.3936
HOXB5	ENSG00000120075.5	mRNA	17.2444	11.2275	18.5054	15.7344	10.8026	10.9038	8.82932	13.8414	14.4644	7.93969	8.74704	16.4612	12.143	11.9435	8.53333	12.8469	9.17009	10.0866	9.13392	15.7298	9.93247	9.74159	10.5723	0	0	12.5114	11.1372	11.7942	13.1357	15.0513	10.7577	13.4567	0	10.1282	10.2572	14.5924	15.0828	8.75858	12.4349	13.9472	8.28032	9.96783	9.56435	12.5688	13.3519	7.66151	11.6543
HOXD1	ENSG00000128645.12	mRNA	10.8308	10.6903	0	10.2101	11.657	9.95188	12.5742	10.3873	8.92979	11.3037	12.6493	8.90424	7.73747	10.1438	11.5773	7.61613	11.2156	13.3959	13.4268	0	12.4812	10.7881	11.9411	12.9726	9.46116	0	7.73131	0	11.4286	8.50275	8.00261	0	11.6464	7.59689	13.4735	8.65466	11.6149	8.8059	9.89866	11.4925	8.32759	9.60064	8.61355	9.44812	7.91337	11.7897	7.80091
HOXD13	ENSG00000128714.5	mRNA	15.154	16.4649	17.5244	12.7056	11.4754	13.2284	9.69367	13.4777	17.3245	10.9702	8.61315	17.5445	10.3575	10.4473	14.8871	11.7495	9.45046	12.8773	16.6554	10.6598	10.7976	13.0653	17.0032	11.3174	10.2786	10.7928	9.1304	14.7751	10.5693	12.8409	11.5163	13.4294	11.4648	11.2157	9.53879	16.1312	15.2783	8.62468	17.1334	15.5958	15.3894	11.64	11.3357	17.7867	11.4267	17.7357	15.7056
HOXD3	ENSG00000128652.10	mRNA	10.3486	10.9324	11.8871	9.62863	9.32824	9.10788	9.83735	9.95754	11.5416	9.9449	7.95179	11.7004	10.5869	6.98686	8.32118	12.5187	6.79791	13.7471	11.8365	8.58411	13.6145	11.9425	12.2334	13.5279	0	10.7143	7.88547	11.3185	10.7537	11.6541	9.47578	8.96132	11.6592	10.3303	10.1965	9.80754	13.0914	8.54634	10.6379	11.9691	10.9381	11.6927	12.087	11.54	10.9698	12.4716	10.5352
HPCAL4	ENSG00000116983.11	mRNA	16.0902	14.7782	15.5155	13.728	15.9125	18.459	14.7195	11.7205	15.2982	15.9048	18.1455	15.8873	16.1993	15.9262	15.8005	15.0611	18.0191	16.3598	20.3206	15.4888	17.1742	14.9975	16.567	17.6904	11.7743	16.9407	16.0767	12.9717	16.7873	16.3961	16.29	12.0993	15.7411	14.0483	16.5965	14.3665	17.869	13.6536	9.89153	16.729	13.1027	16.1131	16.1997	15.208	14.5209	18.4803	14.6503
HPD	ENSG00000158104.10	mRNA	15.8235	13.1569	14.4034	15.2497	15.2274	13.944	13.6041	15.8916	16.4369	12.7119	15.563	14.5322	13.5085	12.5023	16.1043	13.2653	15.161	10.4427	12.5469	13.8139	12.7407	12.6111	13.3966	12.7962	11.7425	14.3822	15.0559	15.5555	15.7274	19.4177	15.3043	15.3459	13.4696	13.6225	15.2563	15.0369	13.7235	15.11	11.3062	16.3816	12.8472	13.0074	13.6233	14.4261	17.4924	13.5478	13.346
HR	ENSG00000168453.13	mRNA	14.4696	16.1538	16.282	11.7344	14.4478	15.5456	14.4654	14.6706	15.089	15.7575	15.951	15.5114	14.73	14.7683	15.1871	16.0996	16.8553	15.5811	16.1856	13.0627	16.7679	16.0309	15.663	17.4086	13.2488	14.8281	14.5052	14.7862	14.9008	13.4227	15.6816	12.0659	17.2123	16.5708	16.1296	14.1916	14.3533	16.1722	17.1615	16.339	16.8878	14.8237	16.8357	15.149	13.697	15.1168	15.1845
HRASLS2	ENSG00000133328.3	mRNA	9.43712	0	11.8227	12.2996	12.2619	0	10.2871	11.2142	13.5092	13.3006	12.0112	11.3142	11.4655	13.14	11.3117	12.3433	13.13	10.2244	11.5916	11.8383	11.3913	0	12.0315	10.7418	11.8719	12.1233	12.1372	10.6695	12.1627	14.7692	12.217	11.6314	15.0807	11.3243	12.453	10.6493	0	10.2162	11.6319	12.1271	11.321	14.2336	11.0229	11.274	12.7794	13.0212	12.529
HS3ST3A1	ENSG00000153976.2	mRNA	17.2795	11.2779	12.9049	15.6093	12.4374	12.3459	11.2694	17.4845	11.1003	10.3776	11.7014	10.8118	14.4167	13.7661	13.8791	15.2079	12.1724	8.9865	13.5038	12.4287	15.6324	11.6976	10.7925	9.50342	9.63378	8.97942	13.6524	13.1662	13.3381	11.0873	16.1124	16.2495	8.82198	12.0845	14.9358	14.8389	9.78895	11.6389	16.3646	12.4494	9.91248	11.4096	15.4362	14.7799	10.818	14.3232	15.8253
HS3ST3B1	ENSG00000125430.7	mRNA	16.82	11.8622	15.2745	14.6097	15.9048	15.3537	14.1318	17.9049	14.6242	12.4934	14.3319	13.0885	18.4035	17.6712	16.0844	16.7008	14.7463	12.323	12.9591	14.6367	13.0806	13.2032	14.9045	14.1248	14.7243	11.5319	11.8973	17.8356	16.9588	13.6416	16.2775	16.7203	13.4799	15.7674	16.517	15.7245	13.8865	15.9473	16.0037	14.5416	16.7185	13.2996	16.33	16.1348	13.2067	13.6172	15.0317
HSBP1L1	ENSG00000226742.3	mRNA	17.2385	16.3214	15.3669	16.7299	17.6098	15.6473	15.61	15.4712	17.7667	15.737	17.2665	15.0817	15.4007	15.9174	15.4318	15.8591	15.8009	15.4671	16.7133	16.0818	15.7618	15.4018	14.5151	16.2131	15.4012	15.4805	14.7646	16.2481	16.9738	15.4632	15.4936	15.7754	17.824	15.1013	16.1443	15.8599	13.9141	16.6576	13.7219	16.8742	14.4351	16.6247	15.2866	15.5311	16.2331	16.1437	16.0674
HSD11B2	ENSG00000176387.6	mRNA	12.6302	16.1622	14.9114	15.6544	12.0563	14.2682	13.6065	14.0507	15.2841	13.9365	12.5241	14.964	15.1823	15.1908	13.8813	14.2485	14.1118	15.8413	14.583	13.5734	14.8143	15.0507	12.3112	15.8043	13.4144	12.8586	12.2419	12.8193	13.3487	13.1062	15.3928	11.5893	14.1861	14.3618	13.0364	13.2585	17.1745	15.9201	13.8524	14.9375	15.5226	13.2207	14.5215	14.8586	12.8967	13.6398	14.0578
HSD17B10	ENSG00000072506.11	mRNA	20.958	20.7457	20.6342	20.5561	20.5929	21.1686	21.7814	20.8364	21.1974	20.9983	20.6644	20.1065	20.2124	20.5624	20.1834	20.3295	20.4779	20.7074	20.7408	21.1674	21.3433	20.1513	20.6933	21.1375	21.0042	21.3308	21.0923	20.0817	21.0972	21.8846	21.1448	20.478	21.2911	20.6845	20.5313	20.7131	20.3604	20.7179	21.1594	20.4825	20.6373	21.0157	21.0537	20.8941	21.7025	20.3654	21.2479
HSD17B11	ENSG00000198189.9	mRNA	19.8946	19.0473	17.7481	19.0059	19.5108	18.8332	19.1593	18.4642	17.9456	17.9715	18.8835	18.972	18.6166	18.1927	18.2224	17.9057	18.3954	18.6335	18.9288	19.0162	19.6154	18.9344	19.3203	19.2231	18.3232	19.6194	18.4764	19.033	19.5323	19.4751	18.1554	18.6299	18.5515	17.5089	18.6038	19.3003	17.452	17.7639	18.5427	18.3175	17.8602	18.5658	18.6532	18.511	18.4382	18.9567	18.014
HSD17B14	ENSG00000087076.7	mRNA	18.3581	18.047	17.6018	18.2463	19.4625	18.7043	19.2869	18.7734	19.0612	18.3872	18.0523	17.6265	17.9792	17.6619	16.963	16.2723	19.5214	17.6738	18.1957	18.4693	17.2275	17.6787	17.3361	18.8143	16.2436	17.8398	17.3989	16.7877	19.0442	19.538	17.1294	18.9425	18.5686	18.3587	18.3146	17.6998	17.9395	19.4771	19.1104	18.1371	18.4888	18.0113	16.5743	16.2801	19.1686	17.7981	17.3819
HSD17B6	ENSG00000025423.10	mRNA	16.398	13.6371	14.7522	15.5115	16.0135	16.8358	17.3702	13.5534	16.1718	13.5606	15.5946	14.6765	17.1814	14.4765	14.6877	15.0287	17.0445	14.0845	15.8593	16.5241	12.9989	14.8332	16.2013	15.214	14.8864	17.6128	14.8888	15.214	15.7806	15.3947	15.6214	14.9354	16.1303	18.8251	18.573	15.0711	15.88	18.3571	15.8036	14.8343	15.4786	16.5931	14.5474	16.3455	15.8752	14.8126	14.4872
HSD17B8	ENSG00000204228.3	mRNA	17.7569	16.7922	17.3992	16.8603	17.6667	18.5374	18.0006	17.1214	18.7658	17.5459	18.2457	16.8599	18.4126	17.3094	17.4078	17.2363	19.4079	17.0806	17.1391	18.7633	17.4963	16.1264	17.4762	17.7157	17.5216	17.8605	18.3582	17.0493	19.1495	18.5126	18.4567	17.0655	17.4141	18.1573	18.1308	17.2286	16.3798	19.2015	16.4651	17.5129	18.5909	17.7707	18.1713	17.805	17.9653	16.4671	17.8455
HSF2BP	ENSG00000160207.7	mRNA	14.0726	13.1656	13.7575	15.2588	13.5996	15.0877	13.7814	14.684	14.5465	13.5547	13.9495	13.8091	14.522	14.0603	13.4597	14.4788	15.0722	13.6421	13.773	14.3333	14.6132	15.329	15.3621	13.8379	13.367	12.6086	14.1142	12.6986	14.6874	14.356	14.1761	13.8535	14.2194	13.4207	13.7684	13.5339	13.6186	14.7714	13.9243	13.2424	13.373	13.3491	14.2596	13.6924	14.8152	12.7518	14.0142
HSPA1A	ENSG00000204389.9	mRNA	18.7134	17.4987	18.0474	17.9437	17.6738	18.9755	19.3132	18.0746	16.9846	16.8309	18.8771	20.2861	19.0795	19.8864	18.5646	15.8969	18.7198	19.5012	17.9579	20.2431	19.9382	18.3967	19.1574	18.0138	18.9094	19.9777	19.0786	19.205	17.2753	18.2319	19.1174	20.2914	18.1776	19.0984	17.322	19.3394	17.4058	20.253	18.4895	19.1048	17.1452	19.23	18.5163	19.3681	19.0755	19.3148	17.6503
HSPA2	ENSG00000126803.9	mRNA	16.288	14.8621	16.3044	16.284	17.2484	18.5196	19.1995	16.4063	17.6753	16.6089	17.9954	18.1321	16.9127	16.5713	17.9547	17.2214	18.2962	16.275	18.4433	16.5682	17.5618	15.2501	18.2995	19.5477	18.1949	15.995	18.007	17.3471	17.9437	18.8203	18.0928	16.1398	18.5229	17.9999	19.6621	16.4992	16.9036	19.1426	16.2586	15.8404	15.7831	14.5582	16.8205	19.0539	17.9259	17.9783	17.9481
HSPB6	ENSG00000004776.10	mRNA	18.1776	17.652	18.7249	20.3742	18.9785	19.4656	20.5529	19.557	21.9069	19.6451	20.9772	18.684	18.1318	19.0675	19.5469	17.8219	20.1829	15.8666	17.3014	18.7586	16.8766	16.9963	18.055	18.9858	19.9561	18.5651	19.1384	19.4929	18.7933	19.5936	19.3883	18.4798	19.77	19.4881	20.1036	18.3744	19.4398	20.5577	19.5038	18.6106	19.7664	17.6566	17.9801	20.0058	20.0874	18.2854	18.3963
HSPB7	ENSG00000173641.16	mRNA	15.9139	13.5244	14.4396	11.9464	16.1562	14.2131	13.5322	14.5973	15.9805	14.2721	16.0726	16.3917	13.4037	12.8355	14.863	12.9274	14.0878	13.8256	15.1084	15.0841	13.339	14.2615	14.5101	14.0016	13.1744	12.3105	12.0249	17.0523	15.3255	14.8533	12.8447	15.3626	15.3987	13.7335	17.9953	15.0538	12.6738	14.2353	16.8322	14.9986	14.9153	12.2767	12.754	14.7827	14.7801	13.9064	11.3332
HTATIP2	ENSG00000109854.12	mRNA	16.4064	16.5668	14.7153	17.2068	18.9797	16.1627	17.0262	18.109	17.2012	15.2606	17.98	15.6232	17.5382	15.5378	15.9421	14.5162	17.4488	16.0333	17.4723	16.6053	19.3333	15.9718	17.9346	16.7543	15.0967	16.3984	18.1051	16.2501	17.6557	16.3366	16.509	17.8484	16.5211	17.4059	16.903	18.1306	14.5882	15.5628	14.2026	16.9207	14.6155	16.9297	17.1887	15.7341	14.9445	16.7904	15.8661
HTR1D	ENSG00000179546.4	mRNA	15.615	10.6282	12.9183	11.0666	12.6499	13.1295	14.0104	13.2572	9.99171	10.2683	11.7936	10.1883	12.9373	11.6215	12.4819	7.09783	13.4485	10.875	12.0269	11.5674	11.1945	11.2664	13.3828	10.9777	12.1079	15.1981	15.0296	11.5426	13.2991	17.038	12.3337	13.3697	18.6933	14.8624	16.5324	12.3393	11.0936	12.1395	12.4203	13.9555	9.80321	13.2204	10.7896	11.588	15.952	10.7661	9.27526
HTR3A	ENSG00000166736.10	mRNA	8.53749	0	0	7.40645	9.94657	13.5489	0	0	7.44605	8.49616	8.3066	0	0	8.33599	8.09307	0	11.7852	8.32623	11.6288	9.35367	7.91038	9.30054	9.1323	8.84265	0	0	9.23783	7.77376	9.52596	10.8178	8.51186	14.4575	9.96566	7.11082	9.81598	8.16703	8.71379	10.7739	0	9.00573	0	10.111	0	0	9.00607	9.53659	8.3099
HTR7	ENSG00000148680.14	mRNA	15.4186	11.4175	11.861	14.7692	13.4134	12.8708	12.1633	14.4312	12.1693	11.4869	12.6501	12.8805	13.3698	12.2854	11.9125	12.1922	12.0949	13.0042	13.7995	14.1416	11.0513	12.5822	12.8369	11.7517	11.4953	13.1503	12.3819	12.984	12.5185	13.1917	10.5031	13.1978	11.682	10.7328	10.0551	13.1158	11.9944	10.7237	10.5553	12.5644	9.98168	13.6529	10.7533	11.1039	12.5648	12.7097	10.59
HTRA1	ENSG00000166033.10	mRNA	22.6945	21.1284	21.0734	22.1417	22.7888	22.0902	23.1216	22.9563	21.6604	21.1182	22.6084	21.6856	22.817	21.9753	22.4968	21.1732	21.084	21.3266	21.7663	23.696	21.6718	21.3527	22.3324	22.7117	22.8581	22.2049	22.4055	22.8046	22.6834	22.0861	22.7181	23.8875	21.6004	22.4033	22.7771	22.0056	20.7426	22.0774	20.427	22.082	22.7826	21.287	21.4558	23.1017	22.4885	22.7281	22.4113
HYAL1	ENSG00000114378.15	mRNA	13.643	12.548	14.6989	13.4117	14.5504	13.6072	13.1858	13.4215	13.4515	15.1552	13.6178	13.0435	13.2154	13.5305	13.6931	12.9661	13.9649	13.8871	13.7101	13.4608	13.3722	13.2097	11.9081	11.6638	12.4946	12.0457	11.4521	11.9837	12.5705	12.0038	14.1392	13.3349	13.8756	13.4635	14.0977	13.2528	13.6908	14.0917	13.2321	13.7965	14.0503	13.3487	12.6728	13.3659	13.2196	12.6806	12.0364
ICK	ENSG00000112144.14	mRNA	16.1579	16.7413	16.1902	15.7445	16.1567	15.754	15.2347	16.4859	15.8756	16.1922	16.5772	16.7617	16.8207	16.3623	16.8144	17.1908	16.577	17.4838	16.5053	15.7368	16.7195	17.3007	16.8601	16.3174	16.4816	15.7772	15.8319	16.3995	16.1798	15.9768	16.2125	15.5175	15.6806	16.3858	16.5322	15.9499	16.4671	16.0957	16.9099	17.1164	16.0384	16.2581	16.683	16.538	15.7864	16.7826	16.6242
IER3	ENSG00000137331.11	mRNA	20.5882	18.5103	16.9636	19.1952	19.0192	18.1794	18.2631	18.4259	17.9308	17.6633	18.6544	17.636	17.875	16.1897	16.6232	15.351	18.8756	16.3701	17.7418	18.9241	17.4318	14.8534	17.7481	16.79	16.3592	16.5605	17.8293	19.2208	17.3715	18.0469	16.6532	19.2905	15.8178	17.2893	18.2861	18.6954	16.6408	16.4326	15.7251	18.7883	15.0154	17.6464	16.8354	17.2365	17.3264	16.7835	15.7548
IFFO2	ENSG00000169991.9	mRNA	18.3933	16.1852	16.5491	16.5602	16.15	16.8651	16.2469	16.714	16.763	16.3615	16.1561	17.0127	17.3239	15.7466	16.6724	16.2581	16.7323	16.2144	15.6792	15.6524	16.932	17.0039	14.9399	15.8733	14.5731	14.769	16.2643	16.5349	15.6229	15.9753	16.0992	17.2363	14.9785	16.573	17.2471	15.4339	15.1493	16.3035	17.0649	17.312	16.9781	17.0474	16.5425	16.1662	16.5324	17.2178	16.0582
IFI27	ENSG00000165949.11	mRNA	18.2303	16.7978	19.4458	19.6471	19.1603	19.4184	18.1892	16.5287	17.858	18.732	17.5711	17.0778	15.7049	18.2842	16.0243	18.3714	18.1937	16.9155	18.0319	18.8873	17.1466	16.8152	18.1888	18.1524	22.1556	18.844	16.901	15.9443	20.8589	18.5007	17.2953	16.4927	21.6719	16.8702	17.9302	17.6624	15.5749	18.4706	16.8199	16.8975	18.6596	18.6893	15.8862	17.4365	18.4788	17.8795	19.959
IFI27L2	ENSG00000119632.3	mRNA	19.4633	18.7744	18.8296	18.9393	19.5338	20.597	19.4861	19.3396	19.6924	19.149	19.8426	18.0159	18.8752	18.3257	18.603	17.8335	19.7885	19.1696	19.3795	19.6022	19.1422	18.967	19.1427	19.1311	18.8917	19.763	19.6674	18.6975	20.2417	20.5017	19.0637	18.9634	19.2442	18.6823	19.3958	18.8506	17.9588	19.4794	18.6419	18.8495	19.1247	19.3482	19.1273	18.4785	20.0636	18.5413	19.4946
IFI30	ENSG00000216490.3	mRNA	14.9031	13.4897	13.5184	16.0256	15.9168	14.5756	14.3775	14.1161	13.8073	13.6967	14.032	13.6597	13.379	12.5362	13.6908	13.2106	14.3454	13.4819	13.5503	15.1188	11.5243	12.2659	13.5378	13.2851	14.9374	13.6447	13.44	14.0147	13.4211	13.5274	11.9902	14.59	13.8405	12.4305	13.6375	15.35	11.9862	13.7775	11.656	13.9179	10.9947	13.6391	12.4103	11.2331	13.0047	13.3501	13.2469
IFITM1	ENSG00000185885.14	mRNA	21.2331	18.452	20.4701	20.868	19.9567	19.6091	19.3066	19.3533	18.7475	19.3369	19.4051	18.7393	18.7752	20.1539	18.1908	18.7742	20.6195	17.8415	19.3625	19.2437	18.3623	16.998	18.0652	19.6872	22.613	19.6334	19.3767	19.8752	21.2348	19.4859	18.5974	19.5146	20.2391	18.3551	18.8061	18.6434	17.2301	19.7007	19.2925	18.3591	18.5248	18.4219	17.3785	19.4026	17.7555	17.9606	20.4454
IFITM2	ENSG00000185201.15	mRNA	21.6028	19.2403	18.4514	19.9799	20.3385	21.3874	20.1994	19.3656	19.1401	19.4782	20.0001	18.1567	18.8982	18.4885	19.3285	18.4335	20.5371	19.0179	19.382	20.4297	18.658	17.6273	18.5655	18.7695	19.7281	20.0588	19.0522	19.1602	19.9454	19.2234	19.1229	20.4752	19.3161	18.6241	19.5962	18.9246	17.8301	18.6172	19.0354	19.5235	18.3587	19.7109	18.0117	19.9679	19.3242	19.3305	19.1314
IFITM3	ENSG00000142089.14	mRNA	23.4853	20.7931	22.1858	23.122	22.434	23.4836	22.6618	22.67	22.3226	21.7849	21.98	20.8754	22.1629	22.2616	21.5985	21.8448	22.4981	20.4753	21.4742	22.1646	21.3895	19.5839	22.3976	21.2339	23.9382	23.0018	23.209	23.8445	23.2713	23.5347	22.246	22.976	23.4602	21.7581	23.2026	22.9114	19.5487	22.9202	21.3168	21.1424	21.4116	22.2737	21.3837	21.9947	22.397	21.7107	23.3877
IFT27	ENSG00000100360.13	mRNA	16.2685	16.1157	16.4732	16.6535	16.0667	15.8495	16.3606	16.2378	17.7128	16.2969	15.8442	16.6297	15.9683	17.006	16.4436	17.1441	15.9164	16.6475	16.2606	16.1303	17.2153	15.2594	16.5927	16.5388	15.7477	15.5263	16.2603	15.3319	16.1946	16.5638	16.2844	15.2677	16.3927	16.2447	15.9155	16.732	16.1731	16.4536	16.6356	16.4108	16.166	16.2047	15.3467	16.0508	15.8549	16.3807	16.091
IGDCC4	ENSG00000103742.10	mRNA	15.3285	15.0454	16.6892	17.6798	17.0016	18.0827	16.7957	16.0563	17.9846	17.3467	17.2069	17.7385	18.2541	17.5917	18.7255	17.4532	17.0528	17.095	15.8198	16.3989	15.1155	16.4308	14.3988	16.3395	17.382	15.1038	17.8594	17.4556	16.7094	17.7006	17.6789	16.238	15.6426	18.1424	18.0722	17.0048	17.9078	18.3659	16.6356	17.8117	16.7134	15.7025	16.8142	16.7262	17.3026	14.3563	16.609
IGF2BP1	ENSG00000159217.8	mRNA	14.2267	7.49198	7.21422	6.69554	9.8153	11.3305	6.68225	13.1195	8.7248	7.78236	7.18061	9.78489	10.5706	7.20989	7.70029	7.73204	8.4288	8.60906	8.85093	7.64234	9.77462	8.58564	5.44682	7.71499	9.25604	7.77479	7.52691	9.37489	8.54846	9.29562	6.8045	9.59999	8.03098	9.90904	9.83656	9.90658	8.22122	7.60466	15.6076	9.28886	8.12284	8.13544	7.41292	9.7448	9.61067	7.09193	10.345
IGFBP1	ENSG00000146678.8	mRNA	14.7713	15.364	15.7822	12.4659	14.9887	15.0652	15.7303	16.1295	13.4317	12.6976	14.9548	15.5503	14.5421	12.8849	15.1283	13.1136	10.4728	14.9503	15.382	17.3043	13.2353	14.951	14.909	14.6078	15.6932	15.7115	14.7887	15.632	13.3855	13.3995	15.0351	16.1828	14.4877	16.1362	15.5752	15.4928	14.0808	15.7248	9.74056	15.2082	16.0311	15.0388	11.3266	14.2265	12.4863	14.4016	15.7927
IGFBP4	ENSG00000141753.6	mRNA	21.9785	20.9173	18.7752	20.3947	20.9156	21.682	20.3901	20.9893	19.6369	20.3545	19.1819	20.5852	20.4571	19.4646	19.5047	19.5805	21.2159	19.9016	19.9751	20.8773	20.0109	18.7532	19.0254	20.5144	18.7001	19.5504	20.0791	20.0674	19.6184	20.5812	19.9205	22.3847	20.4679	19.6131	19.2467	20.0617	17.2137	20.6263	20.7236	20.4688	20.2935	20.3615	19.4693	20.9942	19.5667	19.0092	20.0217
IGFBP7	ENSG00000163453.10	mRNA	23.2859	22.9913	22.2328	23.2661	23.9354	23.4812	24.8214	24.0977	23.808	23.8602	23.7224	22.7402	22.9437	23.3021	22.647	22.355	22.0764	22.418	22.4673	23.3259	22.7763	22.5406	22.9162	23.0358	22.2353	23.6685	22.404	23.1993	24.0899	23.0465	22.6943	25.6619	21.8287	22.7139	23.646	22.7912	19.8569	23.0704	22.3167	22.7825	22.9492	23.1129	22.7736	23.4062	24.0905	22.2741	22.841
IL13RA2	ENSG00000123496.6	mRNA	16.2919	16.1399	18.2231	13.2969	18.4573	19.537	14.5117	19.4869	18.7002	16.3225	15.8982	19.1316	14.2781	12.2713	12.1796	16.7992	18.1115	14.7352	18.2164	19.2276	20.9139	17.8752	20.9379	17.8186	17.4331	17.9313	13.7056	18.8866	16.6744	20.4832	11.5999	19.7037	17.898	15.7648	16.4666	18.3463	19.5352	14.5095	19.0333	19.0648	18.2275	18.3469	12.978	18.3668	12.8885	18.331	13.9577
IL20RB	ENSG00000174564.11	mRNA	12.9079	13.4944	15.0004	13.7721	13.4076	12.7961	12.7193	15.882	13.0289	13.4118	11.6371	12.747	13.0212	12.5839	12.9805	13.0124	12.6982	13.5089	12.9975	13.2976	14.2189	13.9866	12.0496	12.8623	12.3049	13.5562	13.1282	12.8862	13.0581	13.4224	14.3591	13.3538	13.103	11.9658	12.0949	12.8504	13.1482	13.033	13.6603	13.2832	13.8568	13.0819	12.5336	12.5369	13.5373	11.1854	13.303
IL31RA	ENSG00000164509.12	mRNA	14.5654	8.48119	7.62007	11.3757	11.4449	10.3243	6.67552	14.422	11.9629	0	8.16886	6.70291	9.69014	8.19824	6.38202	7.40506	9.41992	7.60599	10.9673	11.758	10.5041	8.57887	8.99436	8.12153	0	0	6.52799	12.2142	9.53975	8.29114	0	10.0078	7.44202	7.38584	0	11.0245	10.8624	0	8.27454	10.0181	0	6.81446	6.41464	7.65603	12.3101	0	8.58595
ILDR2	ENSG00000143195.11	mRNA	14.9591	15.5439	17.5056	14.4594	14.4911	15.5506	14.9894	15.9376	15.9922	17.5126	15.1463	16.1308	18.2757	18.1966	17.4866	17.8565	14.3712	16.8502	15.4834	16.368	17.4337	17.3543	15.8928	14.7607	16.8959	15.3826	16.7172	15.4817	15.7833	15.0229	17.9807	15.7921	15.9416	16.4716	16.0774	17.1623	18.8689	15.7	15.8277	16.0744	15.8857	15.753	17.7169	17.4104	16.3197	17.3271	17.623
IMPA2	ENSG00000141401.10	mRNA	17.6559	15.772	14.7169	16.1813	16.4094	16.6189	15.9914	15.9378	15.4203	15.2517	15.4374	13.9135	15.532	14.1708	14.737	14.9995	16.3838	14.9447	15.0623	15.7968	13.6099	13.3574	14.969	15.0474	13.6755	14.8697	15.2345	15.5881	15.3074	15.5508	15.617	15.3094	17.2315	15.3047	15.4928	15.1528	13.4159	15.9912	13.5135	15.2342	14.3696	14.5197	13.3706	15.2474	16.4112	13.5032	14.0983
IMPACT	ENSG00000154059.8	mRNA	17.4156	17.5905	18.128	17.9717	18.0933	17.138	17.6924	17.7951	17.6148	17.6075	17.7718	17.3507	18.2307	18.0912	18.0888	18.2054	17.7206	17.6316	17.5479	18.0356	17.3323	17.9468	18.374	17.2792	17.7895	17.2361	17.9101	17.9007	17.85	18.368	17.6371	17.4299	17.9835	18.2157	17.9994	17.6736	16.9457	17.5485	16.9722	17.9997	18.0265	17.9246	18.2734	18.1623	17.6519	18.1199	17.9268
ING2	ENSG00000168556.6	mRNA	17.9784	17.3516	17.442	17.5368	17.6252	17.7602	17.3179	17.0227	17.128	16.1236	17.3431	17.4665	17.4952	16.814	16.9893	16.6139	17.1027	17.41	17.1136	18.0967	17.661	17.4569	17.7522	17.9431	16.4368	17.2292	16.979	17.2379	16.5053	16.776	16.82	18.0216	17.6077	18.3377	17.7582	17.2451	17.1665	17.5181	16.7334	17.5418	17.359	17.8544	17.2819	17.4158	17.5818	17.0234	17.0259
INHA	ENSG00000123999.4	mRNA	13.8095	12.6165	12.2452	15.4769	15.2597	12.4446	13.9764	13.497	14.7713	14.2408	13.3895	14.3771	14.2604	12.6367	14.1919	13.7809	14.8133	13.3405	13.3807	12.7132	15.266	13.1294	13.5983	13.6706	13.2163	11.731	13.8966	12.2359	13.4076	11.8411	14.754	12.3909	13.573	15.1365	15.6719	15.4156	13.809	15.6958	13.1986	14.1666	14.3281	14.1167	13.4259	12.6772	14.7937	13.3658	12.0543
INHBB	ENSG00000163083.5	mRNA	14.9468	16.8832	17.5884	13.4179	16.0491	16.7523	16.4259	17.3955	17.1312	17.4544	17.997	17.2074	16.1568	16.6886	17.4267	16.2661	15.5831	16.1896	15.0955	15.67	15.0353	15.0666	17.2223	16.7803	17.6918	16.4288	18.2691	18.3272	16.4096	15.665	17.8555	16.469	14.3403	18.2201	17.6333	16.0002	18.0328	17.8983	15.4232	17.3864	17.6251	16.8335	16.5913	17.4691	15.8093	16.6386	16.8989
INSIG2	ENSG00000125629.13	mRNA	17.9023	17.5072	17.0871	17.3708	17.8165	17.1254	17.2157	17.7253	17.06	16.8836	17.1376	18.521	18.4713	16.6296	17.3031	17.4153	17.4163	17.7102	17.5574	17.7009	17.7521	17.8748	17.2563	17.9294	16.5386	17.0199	18.4443	18.8806	18.6315	18.6014	17.2801	18.0936	16.9463	17.6222	17.9009	18.2791	17.4105	17.8728	17.382	17.7344	17.2405	17.4222	17.1587	17.5013	17.9579	17.5551	17.1197
INSL4	ENSG00000120211.4	mRNA	9.04232	0	8.84499	8.9069	7.87229	0	0	0	7.94958	8.00376	0	7.92408	0	7.84379	0	0	7.65412	0	7.61808	0	9.99672	0	0	0	0	8.40981	0	0	0	8.5196	0	0	0	7.6137	0	0	0	0	0	8.9269	0	0	0	0	0	0	0
IQCF2	ENSG00000184345.4	mRNA	0	0	0	0	0	0	0	0	0	9.63606	0	9.55616	0	0	0	0	9.28537	0	0	0	0	0	0	0	0	0	0	0	0	0	0	0	9.30124	0	0	0	0	0	0	0	9.97754	0	0	0	9.5623	0	0
IQGAP2	ENSG00000145703.14	mRNA	15.4314	15.5404	17.681	16.0233	16.0184	16.3885	16.3607	15.4783	16.5709	16.3292	15.52	17.7377	15.3466	16.5203	17.8793	16.647	15.8701	15.7526	13.933	15.8938	15.8481	17.2171	17.8696	14.7159	14.1309	17.0613	15.3874	14.5456	16.0255	14.8064	15.0731	16.4847	17.9722	16.9805	16.2492	15.4497	17.1606	17.1969	16.8003	16.9035	16.5403	16.2811	16.0645	17.1492	16.3753	17.1083	16.0056
IRF7	ENSG00000185507.18	mRNA	17.7321	15.753	18.3458	18.5356	16.685	18.2248	17.2912	16.7268	17.84	17.3456	17.5313	17.2507	16.6473	17.8263	16.591	17.1538	18.4694	16.5861	16.5371	17.6524	16.4931	15.5452	17.6076	16.859	19.492	17.6525	17.8142	17.513	18.3625	16.6413	17.9868	17.239	19.313	16.3447	15.7494	17.5081	15.2413	18.029	14.4509	16.4491	17.5165	17.4123	16.893	16.3559	16.9588	16.6318	19.3234
IRX3	ENSG00000177508.11	mRNA	18.6737	15.3047	14.3528	17.3758	15.5088	15.9757	12.0147	17.4824	14.8102	13.9762	10.0402	13.0142	13.9785	14.359	11.4771	14.804	15.4627	13.1339	12.2439	14.4509	12.7409	13.2278	13.4343	13.1614	15.2832	10.6373	12.3351	15.2816	14.5267	15.0889	11.5253	15.4855	10.5467	13.4561	16.6224	13.9863	14.7553	14.3199	14.6413	13.6329	14.4914	12.9138	12.0505	15.147	15.4246	14.956	11.3228
IRX5	ENSG00000176842.13	mRNA	14.5185	15.2181	14.5368	13.9899	15.3995	14.1244	15.0052	15.8293	12.3074	12.4993	9.58833	15.1162	13.5262	12.3818	14.2792	13.2321	11.1915	14.4741	13.3153	13.9579	13.5394	14.5827	13.975	13.6601	15.674	12.1843	14.4172	13.4847	13.2592	13.4317	10.2789	14.5501	15.6968	14.9084	10.7777	9.71119	14.9767	14.3423	15.7629	13.666	14.0445	14.1312	12.6982	14.0211	10.9665	14.2087	13.1009
ITGA1	ENSG00000213949.7	mRNA	15.2908	15.9885	15.4212	14.7681	15.7541	15.3064	15.291	15.8769	15.0351	15.3419	14.7283	16.0848	16.655	16.6783	16.2826	16.1854	15.6207	15.6675	15.6774	16.2216	14.9405	15.3327	14.136	14.8101	14.8846	15.2579	15.4719	15.8228	14.2856	15.6378	15.2869	16.08	14.965	16.2744	15.1845	15.7582	13.6856	15.9515	15.1673	16.3547	16.1838	15.1691	15.4161	16.5484	14.3383	16.1704	16.2033
ITGA2	ENSG00000164171.9	mRNA	16.2509	15.0583	15.4137	15.0551	16.9289	16.621	15.8347	17.4397	15.7113	15.8788	16.5417	15.1918	17.798	16.4725	16.3605	16.4263	18.6379	15.1949	14.1657	15.5023	12.9154	16.0191	16.6532	14.3268	16.8258	13.8627	16.2945	14.7221	16.5243	16.6159	16.4433	19.2478	16.5321	16.1518	16.7787	15.5426	16.1382	16.9289	12.7903	16.8832	16.1715	16.709	14.9568	16.2676	16.9272	15.8033	16.2825
ITGA4	ENSG00000115232.12	mRNA	16.5253	14.6836	13.5184	17.8522	14.5599	14.5049	14.3164	17.1619	13.4737	13.3031	13.4705	15.4009	16.1175	15.066	15.1236	15.1574	13.8779	14.5689	14.3816	15.4533	14.4323	13.9572	15.2498	13.1359	15.2004	14.3715	13.8588	14.8963	14.286	14.8429	13.5515	15.7826	14.1927	14.2223	13.0039	16.653	13.6478	13.8524	13.298	15.2534	14.4828	14.5987	14.0814	14.2141	14.9185	14.5628	14.6769
ITGB4	ENSG00000132470.12	mRNA	17.9277	16.7084	18.7655	15.7823	17.6904	20.6449	18.1886	19.0772	17.7476	17.589	17.2227	18.0702	16.9461	17.1975	18.7622	15.6327	19.8476	17.8331	16.375	16.3107	18.3755	18.4455	19.3524	17.3148	18.6799	17.672	18.4472	19.5612	17.2131	18.5665	18.4567	20.3605	20.0356	18.3896	20.0464	17.5848	17.6098	20.2271	19.0194	20.0414	14.8004	18.5038	16.9053	18.6302	19.6037	18.1657	17.7268
ITPR1	ENSG00000150995.16	mRNA	16.8646	14.0215	14.6592	15.5573	15.6392	15.3933	15.4987	16.5476	14.5238	14.2199	15.7299	15.4256	15.6163	15.4107	15.2209	15.0605	15.0576	15.6314	16.7135	15.9321	14.2412	14.8084	14.0744	14.5406	14.2035	13.2893	15.2112	16.4941	16.1899	14.994	13.8177	16.444	15.119	15.1114	15.641	15.3851	15.3433	14.4882	15.4465	15.825	14.2852	15.0281	13.7296	15.0701	15.0693	15.2105	14.6912
ITPRIPL1	ENSG00000198885.8	mRNA	15.8118	16.5222	15.8628	16.1882	15.1755	16.4491	15.916	15.9162	15.0396	15.5101	15.1954	16.2044	16.0646	15.7645	15.4727	15.8865	16.8738	15.4514	14.4664	15.8067	16.2289	15.9943	16.1756	16.1854	16.6047	15.9471	16.1574	16.0398	16.3291	16.5435	16.4387	16.0379	16.7576	16.2376	14.5911	15.5262	16.2019	16.5194	11.3056	14.993	15.4314	15.6482	16.657	16.3649	15.5662	15.871	16.5514
JOSD2	ENSG00000161677.10	mRNA	18.9751	17.7275	17.6821	18.4921	18.9349	18.956	19.1389	19.1491	19.284	18.7889	18.1009	17.2272	18.3102	17.7491	17.5806	17.727	17.5391	17.8237	18.2673	18.4896	19.3103	16.71	18.5731	18.628	17.8733	19.0401	18.6616	18.7351	18.3585	18.3252	18.6033	18.4286	17.7054	17.9051	18.5491	18.5314	17.3881	18.5849	18.1246	17.991	18.0195	17.9595	18.3651	17.7364	18.4733	17.7453	18.2386
JPH1	ENSG00000104369.4	mRNA	15.805	11.1854	10.9992	15.2582	15.9793	14.6349	15.5707	17.1487	13.7327	12.7399	13.8127	11.8407	16.6843	16.0494	12.7506	14.1258	14.1752	11.4702	14.6003	16.5011	12.8891	10.9616	11.6001	12.9352	14.5104	12.5624	12.7462	16.2111	14.0077	14.0229	11.7559	16.26	15.6008	13.8589	15.1093	16.717	13.0661	12.4874	13.703	13.0626	13.3843	13.711	12.0164	11.8423	15.5272	13.7032	13.1697
JPH3	ENSG00000154118.11	mRNA	14.6138	16.4157	14.6242	9.6219	12.7841	16.9465	12.9853	9.67359	11.5864	13.9924	16.2093	15.8765	14.7306	14.2542	13.9881	14.2821	13.4422	17.0533	18.0197	12.8666	15.6595	13.5561	12.863	16.4297	10.1934	9.12433	14.7319	11.1916	13.8051	11.3699	13.6466	10.2159	11.2671	14.6409	15.0245	13.6169	17.3162	12.4429	13.1286	14.053	11.1943	13.5231	12.9985	12.36	10.9042	16.9025	13.0259
JUP	ENSG00000173801.15	mRNA	17.6652	17.0924	17.6965	16.4886	16.2691	17.115	17.2023	16.6654	17.0934	17.021	17.0659	16.3886	16.9858	17.4237	16.7947	17.217	16.8767	16.9316	16.7249	17.297	16.0617	15.7025	16.4274	17.258	16.8757	16.0312	15.7828	17.3004	15.8019	15.8444	16.8808	16.0451	16.9566	17.6199	17.2122	15.4259	16.5962	17.2608	16.4611	17.3404	17.7388	16.9049	16.0399	17.4884	14.6716	17.2627	16.8635
KCNAB2	ENSG00000069424.13	mRNA	17.1422	16.0773	15.7993	17.654	17.1426	17.9056	16.1415	16.8637	15.1192	15.861	17.0912	15.9108	16.3716	16.3727	15.924	15.3901	16.2191	16.7276	18.9198	16.7927	15.2464	15.7593	14.8712	16.3405	15.9209	15.889	15.7786	16.1207	16.0087	14.8858	15.7783	16.6922	16.4688	15.3843	16.767	16.7652	16.7516	16.2687	16.1641	16.0663	15.5872	16.1328	15.4821	15.4053	16.4306	17.2082	14.8247
KCNJ12	ENSG00000184185.8	mRNA	15.1801	13.439	11.0181	9.5509	10.1499	13.0276	8.9535	10.3818	9.87984	10.7221	12.0908	9.85427	11.3526	11.5985	10.4622	9.90966	10.0304	11.5128	13.5454	10.3337	11.1341	10.6022	9.9197	11.7279	6.96278	8.46976	9.67776	8.33771	11.0908	9.31501	10.0753	10.7115	10.5984	10.2526	11.0186	10.8988	12.2966	9.75582	9.8502	11.1546	7.82154	9.67755	10.1032	11.5236	8.72477	12.6203	8.6121
KCNJ18	ENSG00000260458.3	mRNA	0	0	0	0	0	0	0	0	0	0	0	0	0	0	0	0	0	0	0	0	0	0	7.47391	0	0	0	0	0	0	0	0	0	0	0	0	0	8.46553	0	0	0	0	0	0	0	0	0	0
KCNK1	ENSG00000135750.13	mRNA	15.1626	13.7195	14.6416	14.8556	15.7925	16.4658	15.8975	13.448	13.1793	15.2541	16.4726	14.9372	15.0387	15.6126	14.7874	14.1913	14.7976	15.6988	18.5725	15.0617	15.7014	12.2326	16.5621	17.4389	11.1678	12.9042	14.9509	13.1608	16.8273	12.6665	13.4056	14.9267	14.7116	12.6196	16.2552	14.5686	16.265	13.3182	10.4807	13.7167	11.5341	11.3074	15.2047	13.46	10.3535	17.1491	13.9729
KCNK2	ENSG00000082482.12	mRNA	17.0232	17.3086	15.6308	16.4154	14.1401	15.4729	14.5678	14.0544	14.8604	16.6912	13.9658	16.7692	12.5785	15.4864	12.2923	14.9273	17.3862	18.0811	15.9879	13.5418	15.9278	16.3177	15.9976	16.6425	11.1749	14.7784	13.3243	15.8597	15.2437	13.9398	11.656	14.3523	14.053	15.2298	14.7332	12.4474	16.399	15.7599	15.1262	14.348	15.106	15.1681	10.9472	16.0382	14.3816	15.7249	16.106
KCNK5	ENSG00000164626.8	mRNA	11.7396	12.0843	9.70669	12.1299	13.244	11.8308	9.53314	12.8283	8.00511	10.5143	10.8645	9.78288	16.6768	6.90534	9.97287	15.1971	14.4307	10.2066	11.1906	12.001	13.081	9.86153	10.1522	11.794	10.7026	9.78489	12.0454	12.7554	12.1449	11.157	7.08033	13.2222	9.89004	12.7497	15.2506	11.6784	12.7534	14.0946	14.5168	12.5946	10.3968	10.0878	10.2687	15.0886	12.1898	12.0602	9.4541
KCNN4	ENSG00000104783.10	mRNA	16.5301	13.8962	16.8273	17.3788	14.9714	16.9894	14.5472	18.1044	13.5835	14.4054	15.2452	12.947	17.2452	12.3705	14.6929	13.9065	15.0642	13.1413	13.1061	17.4524	12.7453	11.6369	11.8376	11.9151	13.7895	13.1449	15.0973	16.3533	12.2776	16.1073	13.6876	18.3369	17.9059	13.6611	15.6266	15.3247	13.5792	13.9618	16.7255	15.1079	12.7574	14.185	12.8285	12.2955	17.4278	12.7476	13.9167
KCNQ1	ENSG00000053918.14	mRNA	16.5639	16.3647	15.0653	16.8466	16.6586	17.1077	17.4788	16.4193	16.0613	15.5205	17.0123	15.5411	16.2447	15.4092	16.5278	15.8796	16.4897	16.6249	16.0477	17.4686	14.5757	14.909	15.2259	15.8406	15.2329	16.2139	15.6447	16.9351	14.2279	15.9216	15.5207	16.7443	15.8355	15.9677	15.8758	16.2152	13.6069	15.755	15.216	16.2009	15.9042	16.6061	15.6575	16.0108	15.9221	15.7603	15.8175
KCTD14	ENSG00000151364.14	mRNA	12.1558	12.0449	15.7037	14.2551	14.9049	16.1848	14.2028	14.896	14.5515	12.1143	12.3836	13.3318	16.3392	12.1761	14.7246	15.3064	13.1088	12.8507	12.6337	15.6076	16.0446	13.5052	13.121	13.6314	17.5403	15.3628	15.6033	14.8702	15.1155	12.3688	15.8577	16.2094	14.9752	14.2769	13.3109	13.642	12.1626	13.8424	12.3994	12.9469	14.6124	15.6544	13.4058	15.9558	13.931	15.9256	15.8381
KCTD15	ENSG00000153885.13	mRNA	16.1856	17.992	18.523	15.996	16.5133	17.4785	16.9046	15.7316	18.6814	18.642	16.8625	17.8234	17.5558	17.5162	17.3195	18.0146	17.5443	18.0679	16.9644	15.7618	16.9191	17.3699	17.9047	17.7937	17.4122	15.5686	16.8552	17.3159	16.7004	15.7566	17.7843	16.4514	16.8578	17.2319	17.966	16.6406	18.5069	18.6112	18.7811	17.8833	17.0642	15.7105	18.1542	17.4361	16.3585	17.9245	17.0703
KCTD2	ENSG00000180901.9	mRNA	17.2838	17.8889	17.9659	17.1999	17.697	18.6716	17.5152	17.6951	18.4561	18.2445	18.8329	17.7432	18.2026	17.8057	18.1535	18.0339	19.1215	18.2593	18.7707	18.0781	17.9117	17.7952	18.6433	18.1927	17.7678	17.4018	18.4087	18.353	17.5106	17.6728	18.7413	18.2729	18.3157	18.3844	18.3438	17.7295	18.7364	17.9934	18.0888	18.5193	18.8138	18.6961	18.5296	17.8867	17.9525	17.8283	18.4364
KIAA0513	ENSG00000135709.11	mRNA	16.6242	15.2859	16.2207	16.2182	16.3502	17.5815	16.2296	16.2075	15.5837	15.4379	17.1382	15.9922	16.5865	16.1657	16.3635	15.5451	16.5093	16.1529	18.3632	16.7267	16.3739	16.2106	15.7869	16.5211	15.5166	15.4773	15.8597	16.2417	15.979	15.3539	16.0484	15.2118	16.0029	16.2487	16.8445	15.924	17.3173	15.9054	16.3419	16.3369	16.2356	16.4191	15.8953	15.9767	15.7057	17.7957	15.4672
KIAA0895	ENSG00000164542.11	mRNA	15.2173	14.819	15.8182	14.6462	15.1005	15.372	15.4847	15.0774	15.1529	15.6117	15.4512	16.1259	15.7874	15.5759	16.08	15.1759	15.7104	13.5102	16.3113	14.9671	16.0722	13.6915	16.5665	15.8595	15.7407	15.0041	16.3677	15.3978	16.2391	16.757	15.4671	15.4947	16.2849	15.5285	14.8206	16.1248	16.2682	15.8304	14.8431	15.8461	15.2963	16.1777	15.5298	15.3144	16.083	14.7344	15.2621
KIAA1107	ENSG00000069712.10	mRNA	14.3867	13.5921	14.1269	13.91	14.8625	15.6987	13.5007	13.7247	13.9971	14.1504	15.516	14.4165	15.1023	14.5977	14.7719	11.4908	15.1589	15.1441	16.7941	14.3421	16.4959	15.4394	15.3258	15.6225	12.0609	13.4308	14.4844	14.485	15.734	15.2177	13.1663	14.2607	15.2312	14.4388	15.0595	15.1526	15.9765	14.8352	13.6571	14.93	14.1173	15.5761	14.97	14.2477	14.1109	16.453	14.6438
KIAA1324L	ENSG00000164659.13	mRNA	13.315	15.8256	15.3351	13.1613	15.6065	15.0816	14.5284	13.2862	13.5677	14.535	15.7325	14.1663	15.2675	13.7477	14.8236	13.8228	16.1866	15.5303	15.9159	14.3449	14.4155	16.6282	16.5473	15.5496	12.4206	13.52	12.8153	14.9624	13.8652	16.0069	12.9126	16.0913	15.6706	14.2373	15.7351	13.6459	16.7846	15	15.1781	16.3642	14.0259	15.7728	13.5656	14.4771	12.0588	15.7251	13.8799
KIAA1671	ENSG00000197077.11	mRNA	14.0872	13.5766	15.051	14.7938	14.2249	14.8972	15.079	14.8845	15.6308	15.1988	14.869	13.6778	14.53	15.3327	15.0109	15.5482	14.8195	13.959	14.4455	14.9131	14.6013	14.1608	15.9526	13.2696	15.4978	13.5819	14.6973	15.8044	13.8778	14.0709	14.0371	15.0016	15.9791	15.8598	15.0766	14.6691	15.0412	14.5576	15.2432	14.9195	15.4103	14.7005	13.861	15.9582	15.0593	16.0989	15.2326
KIF26A	ENSG00000066735.13	mRNA	11.2933	15.6948	13.6432	12.6207	11.8826	13.9041	12.4918	12.7414	12.3622	14.1554	13.2264	16.4987	12.2605	13.6162	14.2331	14.0391	14.3715	15.5163	15.1003	13.7458	14.0786	14.456	14.3122	15.4761	12.3289	12.5688	13.1888	12.4364	12.3265	11.1174	13.043	11.0299	13.2205	15.2224	13.4679	13.6648	13.7106	13.1053	13.1117	15.4089	13.8343	14.887	13.3826	13.5463	10.1343	13.3199	14.0917
KIF26B	ENSG00000162849.14	mRNA	16.2391	15.3592	14.1058	16.5412	13.5143	15.8489	14.642	14.9249	14.4635	15.0559	15.6712	16.2992	15.1393	13.426	14.3829	15.7067	13.1646	14.8332	14.2293	14.4004	15.9172	13.4446	14.1512	14.2337	14.4065	12.9318	13.8182	15.7605	12.8838	12.99	14.0315	15.1676	13.952	15.2795	14.5834	14.2068	13.3702	15.2054	13.0862	14.6791	14.0075	14.5006	15.0789	14.2615	13.6957	16.4752	14.2567
KIF3C	ENSG00000084731.12	mRNA	18.0422	18.3351	18.1915	17.3512	17.4994	18.4919	17.0261	18.1772	16.9226	17.5726	18.1893	17.9143	18.3218	17.4501	18.0994	17.3871	17.9119	17.91	19.4072	17.7211	18.4099	17.9106	18.5488	18.7748	17.8838	17.6733	17.841	18.1173	16.4438	16.9731	18.0529	17.3427	17.5217	18.6476	17.6317	17.3588	17.9637	16.4556	18.5094	18.0611	17.0088	17.9381	18.7678	17.8103	17.9393	19.6162	18.0705
KIF4A	ENSG00000090889.11	mRNA	16.3119	17.8863	17.0484	17.2372	14.8055	16.7176	15.3545	17.7144	16.1355	16.5525	14.9676	17.9224	15.6036	16.5438	16.6035	16.5963	17.3813	16.4686	16.3952	16.0807	17.9159	16.7385	17.396	16.781	17.3988	17.2494	16.7833	15.3291	16.0529	15.5338	17.4431	15.5937	18.6653	17.5123	15.8686	16.9231	17.1412	17.448	17.2627	16.5941	16.1524	16.6933	17.6949	17.0266	17.7627	17.2606	17.5117
KIF5A	ENSG00000155980.10	mRNA	18.0801	17.9182	21.0828	15.4295	17.9096	19.6478	18.0312	15.9569	17.1164	17.9451	20.1697	18.3839	18.9259	18.6346	18.7646	17.7272	17.9338	21.5693	21.633	16.8324	18.4594	18.7292	19.3281	18.8461	16.8952	16.2978	17.5174	16.8863	18.4034	17.6008	17.5821	16.1651	16.0381	17.9856	19.7904	17.3408	19.1556	17.1318	17.563	17.7937	16.8946	18.2479	17.9006	17.5819	16.8585	19.0288	17.5467
KIF6	ENSG00000164627.16	mRNA	10.4366	9.10485	13.3621	11.1831	13.0824	13.9781	12.653	11.3021	12.4485	11.2276	13.0683	11.6544	12.0746	10.4439	11.2941	9.83054	15.685	11.4721	12.7817	11.2984	12.2495	14.3088	13.5435	13.1425	9.33363	9.8905	11.0207	10.5769	13.8909	12.9342	8.41406	11.8018	13.7834	12.5647	13.2608	11.1307	12.9817	14.9281	11.4804	14.3029	11.0942	14.6239	9.11278	10.1332	12.3429	11.1376	8.79548
KIR2DL1	ENSG00000125498.18	mRNA	0	9.92942	9.65026	0	10.4108	11.1896	9.69882	0	9.75202	8.22461	0	0	0	8.06455	0	7.85356	12.1168	8.05479	7.83868	10.8872	0	0	0	0	0	0	0	0	8.67021	9.739	0	9.45921	0	7.83431	0	7.8957	7.85924	8.04669	0	9.73224	9.56356	8.25709	0	8.1049	10.1472	7.9462	10.0344
KIR2DL3	ENSG00000243772.5	mRNA	9.23518	9.63827	0	10.3206	8.47841	9.57746	9.82224	0	7.55964	0	0	8.53028	0	9.76932	0	0	10.4262	8.44011	7.22861	10.7884	0	0	0	7.95953	0	8.01938	7.35847	7.88748	8.05868	0	7.62942	9.84532	0	7.22424	9.34586	0	0	9.42991	9.10987	7.53995	8.95116	8.64257	8.23979	0	8.53641	10.1356	8.42378
KIR3DL2	ENSG00000240403.4	mRNA	8.10137	8.76613	7.90441	9.96187	9.50958	10.0252	7.95283	8.87773	0	8.06007	0	0	0	8.89705	0	7.68918	10.5118	0	7.67432	9.91546	0	0	0	0	0	0	7.8044	0	10.0878	8.57597	9.07308	8.29663	0	0	0	0	7.69487	9.4631	0	0	0	9.08989	0	0	7.9865	0	0
KLF12	ENSG00000118922.15	mRNA	14.8372	16.6839	16.9907	14.7464	15.0621	15.3499	13.9427	15.2293	15.6567	16.1941	15.8545	16.4336	15.0853	16.1322	16.2264	16.9244	15.1266	16.7149	16.0587	14.3428	16.2306	16.2109	15.0706	16.0079	16.5099	14.4463	15.9261	15.8263	15.3503	14.8891	15.6549	14.4876	15.6605	16.4152	16.3259	15.2898	17.5611	15.497	15.4399	15.5649	16.0322	15.2877	16.1731	16.1073	15.2915	17.0477	16.8198
KLF17	ENSG00000171872.4	mRNA	12.4456	10.026	9.1627	12.58	11.4329	11.608	11.7942	12.3462	11.786	10.9022	13.7264	10.2377	13.8989	10.1571	12.9346	13.8267	11.2138	10.6064	11.5145	10.6361	11.1887	10.1238	9.76304	10.4722	7.80083	12.5821	13.6448	14.2062	11.7638	12.0823	13.1397	11.8762	7.98686	13.6527	13.8612	12.1159	10.1209	10.4609	8.23717	10.9434	10.4667	10.6719	12.2673	12.6884	13.3088	14.7375	10.59
KLF4	ENSG00000136826.13	mRNA	17.3315	15.099	17.3255	16.4731	15.4109	15.5686	16.0581	15.304	15.6185	15.8365	15.4638	15.2596	15.5554	14.9534	14.5139	14.6381	14.4616	15.6251	15.5308	16.5527	15.5318	13.8047	16.8853	14.4614	14.7594	15.9829	15.2862	15.9591	15.1968	14.3774	14.9901	16.3951	16.393	15.8822	16.971	15.7866	14.6791	15.3766	15.8593	17.5233	15.4559	15.4685	13.6392	16.243	14.4357	16.1807	15.5415
KLHDC9	ENSG00000162755.12	mRNA	15.6315	13.7469	15.3995	15.3249	17.4999	17.6417	16.4039	15.8145	17.8593	17.5228	17.3326	15.0196	17.0951	16.5159	16.6832	16.9731	17.7764	14.3322	18.0149	16.9796	17.6962	13.8938	17.864	16.7079	17.6301	18.6901	17.4198	15.7595	18.6048	18.4861	17.9429	16.1528	16.079	17.2401	17.8067	17.0154	15.8854	17.4326	14.4004	16.9203	16.8845	17.7071	16.4923	16.9913	17.5724	16.3689	15.6592
KLHL3	ENSG00000146021.13	mRNA	13.2253	11.7768	12.4686	14.3184	14.4008	13.3424	13.2071	13.1047	14.7906	12.8054	13.8746	13.4606	13.4354	12.7667	14.0869	12.9601	12.4542	13.987	13.7767	12.9488	14.7149	14.6028	12.9643	13.3282	12.5743	10.5591	12.022	12.2257	11.9723	12.0222	12.0984	11.5405	12.1693	14.0915	13.6723	13.4581	14.6908	12.4172	12.7465	15.041	14.1724	12.838	10.8066	13.3472	12.4202	13.3405	13.0293
KLHL32	ENSG00000186231.15	mRNA	12.8187	13.7872	14.9674	13.3485	15.4701	15.5176	16.4444	14.1228	15.3076	13.9635	16.3637	14.339	13.8082	13.9777	15.0959	13.0703	16.1659	16.1538	16.9941	14.1707	14.0318	16.6139	17.0772	16.8017	11.6453	14.7188	13.1543	12.4797	15.3026	13.6846	11.7426	13.4233	15.4261	13.9703	17.1116	13.5548	15.9489	14.1069	15.5595	15.5102	14.8001	17.0298	13.1328	11.8867	11.933	15.5821	11.5907
KLHL35	ENSG00000149243.14	mRNA	13.4258	15.4382	15.1242	11.2362	11.5853	12.9911	10.8444	12.1221	11.1606	12.4876	12.3703	12.5496	11.7012	11.5567	11.8692	10.2581	10.9228	14.2005	14.5996	11.3472	14.4763	10.4365	13.9675	16.6367	10.5676	10.4972	11.695	11.1529	12.0766	11.0545	11.4005	11.6221	11.6868	12.0453	12.4113	13.9214	11.1212	11.3094	11.938	13.7152	11.0594	12.3627	11.1166	11.7576	10.7263	12.1576	10.9028
KPNA5	ENSG00000196911.8	mRNA	15.8159	16.1101	15.942	15.2897	15.5762	15.3409	14.8612	14.557	16.0604	15.9789	15.9192	16.7622	15.9145	16.0546	16.0389	16.4708	15.8556	16.476	16.6114	15.6703	16.0911	17.5782	16.4864	15.3756	15.5482	15.5259	14.8617	16.126	16.7545	16.1538	14.8755	15.6806	14.7425	15.3664	15.9198	15.9071	16.5306	16.0299	16.7246	16.1411	16.1972	15.9604	15.4862	16.2683	15.3009	16.2581	15.0803
KRT17	ENSG00000128422.14	mRNA	18.5773	11.2356	12.7118	11.9184	12.1321	14.3441	12.2675	12.3944	11.9582	12.0797	12.4301	11.5404	13.3238	12.504	11.1231	11.3355	13.1269	12.5791	16.3174	11.9391	11.3547	10.4271	12.0128	13.6398	0	11.0281	13.7032	15.3868	14.0442	10.9456	12.0284	16.7582	14.7925	11.3986	13.1647	12.045	10.4242	12.6895	11.9286	12.5904	11.7696	12.607	11.2492	12.3075	12.1314	10.5114	10.604
KRT18	ENSG00000111057.9	mRNA	17.6902	13.0296	13.4245	14.9641	13.6842	14.5316	13.5788	17.2618	13.632	13.447	12.6416	12.841	13.6704	13.7014	12.3964	13.0544	13.2834	12.3547	12.8897	13.7802	13.1487	11.6684	11.3745	11.7122	12.2145	13.0768	12.7483	12.4591	12.8533	12.7947	13.6147	14.809	13.2086	13.4551	12.1844	13.4861	10.9983	13.5414	12.8655	13.4882	14.1267	12.3972	12.2634	14.8847	13.7423	13.8305	13.021
KRT25	ENSG00000204897.6	mRNA	0	0	0	0	0	0	0	0	0	0	0	0	0	0	0	0	0	0	0	0	0	0	0	0	0	0	0	0	0	0	0	0	0	0	0	0	0	0	0	0	0	0	0	0	0	0	0
KRT7	ENSG00000135480.13	mRNA	14.8843	8.9629	10.3597	13.8582	14.8203	15.2742	13.2818	14.0354	12.3676	11.5154	14.7399	11.2428	15.1713	10.5776	12.0805	12.5577	11.5792	8.34889	12.6513	16.0419	12.5123	8.7394	11.6972	9.60106	7.41628	14.0789	14.408	14.5537	14.4537	16.4503	11.5311	13.7968	12.2096	13.6675	14.1591	14.4764	6.57834	11.5592	9.17028	11.9005	9.59558	11.7703	11.0187	13.2362	14.2398	10.4589	12.8931
KRT8	ENSG00000170421.10	mRNA	17.575	11.7041	11.9083	14.5038	12.6355	12.9997	12.5306	15.6027	11.9415	11.8083	11.7702	11.6459	12.3877	11.2328	10.9892	11.8509	12.457	11.1121	10.9517	12.1415	12.1798	10.7668	11.0311	11.0735	11.0235	12.2156	11.0258	12.0008	11.173	9.96432	10.6546	11.8757	11.5511	11.7701	10.698	11.0634	10.1794	11.1039	10.7247	11.6935	11.6807	10.6715	11.0222	12.5181	12.7141	11.4883	11.737
KYNU	ENSG00000115919.13	mRNA	14.4818	12.8468	11.2846	14.2233	14.2211	13.4814	13.0173	13.7411	11.6543	11.6334	12.7955	12.0946	13.1182	11.2949	12.4158	11.7203	12.7034	12.7268	12.8091	13.9773	13.1687	11.2761	12.8121	11.7583	11.3915	13.8842	12.4146	13.5601	12.0672	13.7568	11.3013	13.9548	12.0756	11.2288	11.9031	14.1732	10.5472	12.3055	12.7696	12.6281	10.0268	13.3012	11.3736	9.61418	12.9759	10.9731	11.9611
L1CAM	ENSG00000198910.11	mRNA	15.574	16.9641	15.2702	12.9312	15.1289	16.3532	11.7452	14.5529	12.7584	14.1692	15.902	16.8475	15.8093	14.4535	14.2328	14.0025	14.1712	14.8076	18.2759	13.4304	17.2515	13.4623	14.2595	18.2402	11.4075	14.0711	14.5491	16.2455	14.3635	12.1125	13.9998	15.1094	13.5561	13.4803	14.4305	15.3146	15.6067	14.3683	14.6345	18.2929	11.5009	17.1515	16.3579	14.5322	11.0423	16.3606	13.352
LACC1	ENSG00000179630.9	mRNA	15.4407	13.3184	12.9249	16.4177	16.0289	14.0684	14.9688	15.4142	13.7563	13.1349	16.3652	15.1443	15.2097	13.5356	15.2707	15.8926	14.0985	13.6403	15.2907	14.5192	14.4183	13.9757	14.8285	14.0315	12.4648	13.2292	13.4748	15.4743	13.7941	13.8026	12.1508	16.2578	14.1835	13.2682	15.978	15.4129	14.0252	13.3932	12.5007	14.5918	14.279	14.3334	13.1065	14.227	13.5108	14.5146	13.5094
LAMA1	ENSG00000101680.12	mRNA	14.7942	14.1071	10.9277	11.0906	14.074	14.6718	11.8898	12.5296	15.0701	10.5302	11.9648	15.8912	12.1591	11.0435	11.6042	15.6487	14.0952	11.344	13.2982	10.7655	14.6061	12.5624	13.3093	14.2199	15.9975	16.2174	14.1917	12.8937	11.329	13.2997	16.8519	15.6653	17.8623	14.6901	10.4134	10.4529	15.2733	14.3717	12.6255	12.9505	16.7892	14.4231	15.0317	13.8687	13.4401	13.3284	16.2519
LAMA3	ENSG00000053747.14	mRNA	14.4273	9.9155	10.1383	14.1032	11.8686	11.8759	12.9563	10.2749	10.767	9.90779	11.3561	10.3364	11.3653	10.8789	10.5029	10.9002	13.4208	10.8691	11.3736	11.0882	10.8668	10.4724	14.1811	10.4122	11.2389	11.3687	10.9041	12.3759	11.3257	12.0813	11.0802	15.7006	16.0946	10.944	11.8504	11.9635	10.1258	11.5976	12.0763	13.2139	10.5029	12.5516	8.92492	11.4082	13.0747	12.592	10.0648
LAMC3	ENSG00000050555.16	mRNA	15.2671	16.9356	16.5095	14.5477	16.3481	15.9382	16.4384	16.4609	16.2933	16.7889	15.9075	16.0888	16.747	17.1871	16.2018	16.5711	15.9219	17.4147	16.1606	17.0948	15.3988	15.1572	13.7148	15.7715	16.0239	15.696	15.3071	15.2934	14.0088	14.7506	16.3815	17.5218	15.6083	17.6298	15.8362	15.9465	13.7957	17.3998	16.166	16.1239	16.8649	15.5384	15.7702	16.8518	14.3525	16.2606	16.645
LAMTOR3	ENSG00000109270.11	mRNA	18.4186	18.3122	17.8574	18.2819	18.8266	18.1009	18.3853	18.0167	18.1748	18.1727	18.454	18.4139	18.2243	18.2676	18.3953	18.3913	18.408	18.0532	18.8183	18.3191	18.0584	19.0096	18.4181	18.4412	18.0776	18.911	19.1197	18.3548	19.8409	19.5085	18.0152	18.4414	17.6791	18.2993	18.2358	18.8063	18.8426	18.335	18.9216	18.2062	18.3614	18.7084	17.9724	18.5098	18.3679	18.1589	18.394
LARP7	ENSG00000174720.14	mRNA	17.829	17.9764	17.7035	18.1441	18.0399	17.6306	17.6088	17.5125	17.9357	17.9384	18.1053	17.9911	17.9009	17.7799	17.668	17.8394	18.4175	17.6264	17.7021	17.9272	17.8916	18.4365	18.9025	17.1635	17.3376	17.8546	17.3995	17.4996	18.1336	18.1462	17.8478	18.3582	17.8282	17.4907	18.049	18.1101	18.4619	17.9921	17.6209	18.1868	18.4117	18.1991	17.7921	18.0565	17.612	17.2371	18.1282
LAT2	ENSG00000086730.15	mRNA	17.781	16.5611	16.1064	18.6661	17.8434	17.731	18.7063	17.1969	17.3601	17.2145	18.0321	16.7267	17.6888	16.8373	17.6224	16.5017	17.9319	17.8105	17.355	18.7751	15.4857	16.4553	17.3367	17.1276	17.4783	17.3181	17.2602	18.0796	17.4521	18.5449	16.2864	17.8609	17.5618	16.1268	16.8084	17.9249	15.7564	16.3701	15.7796	17.2301	15.4516	17.7377	16.6181	15.7462	16.8381	16.6941	17.2785
LDHA	ENSG00000134333.12	mRNA	22.052	19.7234	20.3284	21.5554	20.9486	21.3332	20.9531	22.2056	20.0701	20.0768	20.4848	21.7687	21.4448	20.3621	20.8367	20.2789	20.4878	20.263	20.6182	21.8294	21.8023	20.021	20.4157	21.8324	19.8296	20.7263	21.8758	22.0236	21.8618	21.3905	20.8198	22.0402	19.9006	20.7188	20.7109	22.0525	19.5103	21.6719	19.2893	20.788	19.886	21.2766	21.2086	21.1228	22.1421	21.4286	20.452
LDHD	ENSG00000166816.12	mRNA	15.0793	14.6715	15.3824	15.0316	17.2529	16.7602	17.4984	15.3131	16.0014	14.8645	17.223	15.4131	15.7365	14.9042	15.7635	15.2533	16.6614	16.082	16.8669	16.4044	14.0914	15.3384	15.4969	16.5561	14.4696	14.9653	15.2496	15.9483	15.4938	14.452	14.796	14.4381	15.2723	16.986	17.8545	16.3107	16.1428	16.4533	15.8935	16.1743	15.7392	16.405	14.2484	15.353	15.0689	16.0639	14.2524
LETMD1	ENSG00000050426.14	mRNA	17.0603	16.8133	17.0296	17.7077	17.5592	17.1405	16.7496	16.5337	17.9924	17.357	17.224	17.0537	17.2047	17.1152	17.1895	17.194	17.6595	17.193	17.443	16.8325	17.0043	16.9935	17.1635	17.349	17.0541	16.8154	17.1554	16.9297	17.6573	18.3289	17.3897	16.694	17.2658	16.7868	17.7881	17.084	16.8794	16.8066	17.2821	16.9419	18.2635	17.3601	16.7772	16.8842	17.358	16.5678	16.611
LGALS3	ENSG00000131981.14	mRNA	21.7728	18.2757	19.2954	21.028	21.0662	20.6332	22.2938	21.3106	20.047	20.5044	21.5105	20.204	22.0109	21.0032	19.997	20.6458	19.2237	17.5593	20.1842	21.1347	20.921	18.6086	18.8615	19.5786	19.6448	20.8332	22.9155	22.3086	23.1924	22.0477	20.6389	21.195	21.3993	20.7905	21.7075	22.7051	17.754	20.6794	17.4459	17.9552	19.9313	19.4713	20.9162	21.991	22.114	19.4966	21.0564
LGALS3BP	ENSG00000108679.11	mRNA	22.3189	20.3293	21.5678	21.969	21.7238	21.3951	21.4109	22.2252	20.9771	20.2096	21.576	20.1445	21.1504	21.7592	20.4724	20.6158	21.1168	20.3809	19.9148	22.2579	20.2156	19.8442	21.0941	20.9332	23.4338	20.8406	21.5041	22.5303	21.1144	20.7901	21.2859	22.7326	21.4226	21.0501	21.3454	21.3883	20.0297	21.3962	21.2195	21.2576	21.5282	20.973	20.6236	21.1286	20.9406	20.7328	21.8967
LGR4	ENSG00000205213.12	mRNA	16.9071	16.6206	16.3687	18.7156	16.8452	17.2593	16.2161	16.9106	17.0305	16.4305	16.4965	15.8148	16.9677	17.1337	16.8426	17.1929	17.6278	15.5897	16.0275	16.9515	15.5657	15.6746	17.9668	15.936	18.0854	16.9155	16.2416	16.8439	17.8475	17.2138	15.7195	16.8144	16.9815	16.2533	17.3779	17.4299	17.2778	17.1902	15.7184	16.4664	17.4757	16.7575	16.6509	16.59	16.3846	16.2492	17.0232
LGSN	ENSG00000146166.15	mRNA	0	8.45552	7.27439	9.78815	9.29161	0	7.3227	6.26027	0	10.0077	0	0	8.49672	0	7.02804	8.85931	6.09145	9.06095	8.0394	7.87176	6.84613	0	0	0	8.90222	7.83509	7.75625	7.70326	8.45728	6.95056	6.45362	6.67291	9.7881	8.61815	10.3296	7.68317	0	0	8.92517	10.2552	0	8.04434	6.07157	8.30575	6.36507	0	8.2393
LHX4	ENSG00000121454.5	mRNA	10.7981	13.3479	14.758	12.1025	11.0396	11.6551	10.6491	9.99231	11.3097	12.5732	10.8746	13.6235	11.9463	12.2906	12.4188	13.141	11.7941	13.1933	12.7965	10.8675	11.8205	12.6934	12.2109	12.7772	10.9296	9.35813	10.2779	10.4469	11.3345	10.2042	11.2378	11.1865	11.0733	12.3295	11.9591	12.2235	13.2064	12.0433	12.6372	11.9901	12.728	11.0972	12.6648	11.4138	10.3782	13.2135	11.905
LIG4	ENSG00000174405.12	mRNA	16.3287	16.2946	16.5501	16.1193	16.7599	15.3537	15.536	16.1216	16.1699	16.032	16.2266	16.6642	16.4011	16.2617	16.8157	16.51	16.3242	16.4844	16.8055	16.1383	16.8383	17.3571	16.1416	16.0383	15.6741	15.1681	15.7996	15.9936	16.6518	16.284	14.6465	16.7183	16.4733	15.6597	16.6305	16.5165	17.0527	16.2419	16.5304	16.0776	15.9166	15.624	16.1185	15.9974	15.6202	16.5133	15.9874
LIMS2	ENSG00000072163.17	mRNA	15.53	15.8324	14.5885	15.1583	16.9353	16.5982	14.9987	13.5556	15.6655	16.2816	15.472	14.5984	14.5725	14.6682	14.6972	15.1271	14.6479	18.7785	16.5888	15.0543	17.408	15.356	14.413	16.6914	14.4587	15.591	14.7527	13.825	14.0456	14.6758	15.6958	14.8631	16.0311	14.8077	16.4882	14.6971	13.9661	15.0321	16.0198	18.0306	15.1233	15.4647	15.6134	15.8409	13.9786	16.1206	14.9807
LIPE	ENSG00000079435.8	mRNA	14.0757	15.6486	15.375	13.6385	14.8303	15.3723	16.4625	14.8706	15.0716	15.8356	15.5652	15.1359	15.1236	15.4585	15.1415	15.4631	14.7709	16.4153	16.4774	14.4423	16.1296	14.9282	14.8389	17.8698	14.8356	15.3784	15.0878	14.7648	13.8754	12.5925	15.5702	12.7512	16.4704	15.7553	17.2583	14.2186	15.3936	15.341	12.5865	14.7519	14.4717	13.901	16.6347	15.2925	13.993	16.4469	15.1241
LMF1	ENSG00000103227.17	mRNA	15.2158	16.4145	16.0369	14.7132	16.1852	15.43	16.3532	16.9735	16.5129	16.7395	15.9374	15.9735	16.295	16.6104	15.9561	16.0629	15.6659	15.5473	15.9958	16.0641	16.5287	15.4893	16.6421	16.2057	16.5107	16.4311	16.4963	16.3337	15.5756	14.8655	17.1048	15.063	14.7812	17.1101	16.5339	15.1307	16.1696	16.1094	15.5975	15.8276	16.6244	16.5699	16.6365	16.7987	15.5758	16.8413	15.6862
LMF2	ENSG00000100258.16	mRNA	19.8989	18.8719	18.6799	20.3188	18.7711	19.548	20.0205	20.4154	19.9954	18.918	18.4161	18.7122	18.6468	19.6891	18.988	19.2361	18.9828	18.799	17.9221	19.5574	18.3756	17.6938	18.8676	18.7325	20.1029	19.1321	19.2084	19.2869	17.9156	18.5634	19.0871	19.8829	20.0337	19.2754	18.7541	19.4514	17.7792	19.2586	19.3541	18.6219	18.4968	18.5072	18.5683	19.1637	19.6754	19.1534	19.2974
LPAR6	ENSG00000139679.14	mRNA	17.9169	17.3133	16.9105	18.9096	18.8582	16.9768	18.0158	17.1666	17.4853	17.7918	18.0211	17.3183	17.7137	17.7755	17.7777	17.9132	17.6986	17.3675	16.9935	18.269	16.1619	16.8632	17.7294	16.7466	16.8225	16.9297	17.0372	17.4676	18.6461	18.8314	16.5238	17.3375	16.545	16.8422	17.0838	18.9191	17.5421	16.3887	16.5772	17.1305	17.3595	17.5119	17.2585	16.8988	17.2014	16.449	17.288
LPCAT3	ENSG00000111684.9	mRNA	15.7586	15.2607	16.0483	16.0839	15.5766	16.3573	17.4684	16.0683	15.4693	15.4232	15.9228	15.6735	16.1197	16.1769	16.0666	15.6879	16.7466	15.4472	15.2779	16.2041	14.7932	15.7577	16.68	16.0127	16.2532	15.8237	16.0585	16.5369	15.8701	17.8523	15.7301	16.1301	16.7723	16.1156	15.8988	16.022	16.0873	15.0834	15.3564	16.0643	15.9039	16.084	15.8533	15.9755	16.1861	15.0691	16.187
LPIN3	ENSG00000132793.10	mRNA	13.3376	12.4116	15.4459	16.5941	16.4718	13.8292	13.7838	13.7321	14.8525	13.7033	16.822	14.5254	14.1219	12.8974	14.3048	13.57	14.2415	13.8018	13.3964	11.9541	12.9662	13.6231	15.3526	14.6434	14.0449	11.9876	12.7254	13.8158	12.9744	12.3777	15.3956	12.9169	15.7455	14.4031	14.5866	13.6519	15.4718	13.2088	12.0463	13.2683	13.2642	11.3906	13.1561	14.7661	15.2183	16.3116	14.8193
LPL	ENSG00000175445.13	mRNA	18.163	18.425	18.6214	17.9899	20.0952	18.0439	20.3825	20.2392	16.8256	17.9341	17.3023	20.104	21.1673	21.5021	20.5942	20.3816	20.2041	17.0153	17.6401	21.7305	19.8747	19.5557	18.0606	20.4283	20.1064	21.2462	19.5171	22.0254	18.3519	15.6391	18.0153	19.3097	18.0426	20.8387	20.1848	19.6986	19.4623	20.3748	16.2592	19.4077	20.4939	17.7314	19.848	19.5046	18.9112	17.5744	21.1632
LRIF1	ENSG00000121931.14	mRNA	16.8486	17.2987	16.3233	16.629	16.6454	16.1093	16.0103	16.4928	15.6633	16.7103	16.8144	16.8691	16.0874	16.1677	16.5177	15.8454	16.0176	16.4261	16.6232	16.4817	16.1878	17.2835	17.2401	17.1015	16.8062	16.646	17.3568	16.2705	17.625	17.6438	16.7408	16.8319	17.0956	16.4631	15.7509	17.2421	17.0079	17.0076	17.3591	13.705	16.9583	17.2134	15.6983	17.0419	16.7659	16.6712	16.8785
LRIG1	ENSG00000144749.12	mRNA	17.4904	19.0716	19.1482	17.5036	19.3036	19.9103	20.2543	19.1562	19.2184	19.1558	20.3598	19.1928	19.116	19.3706	19.6081	19.4228	20.7087	20.2053	18.8763	19.4798	18.9472	21.8291	18.4598	19.8233	18.2614	18.5796	19.7632	20.3565	19.0147	18.5585	19.0362	19.6893	18.1954	20.4784	20.1753	18.905	20.3577	20.4131	21.2625	20.0288	19.8876	20.5519	18.5718	19.6686	19.796	19.5757	19.7149
LRP1	ENSG00000123384.12	mRNA	19.0219	18.1095	18.1568	20.1768	19.5797	20.5906	19.1095	19.5014	19.7908	19.8632	20.1075	19.3806	19.9037	20.0757	19.9671	19.9426	19.4519	19.411	17.9263	19.8881	18.7947	18.2264	18.6767	18.5994	20.6262	19.0528	19.7712	20.716	18.5702	19.0697	20.0286	20.5432	18.9309	20.9452	20.3663	19.3244	18.0775	18.8015	19.085	19.7826	21.291	18.9204	19.7921	20.1071	19.6757	20.4901	19.9634
LRP1B	ENSG00000168702.15	mRNA	13.8295	14.6151	14.3776	12.8708	14.2812	13.9706	15.2553	13.9982	13.9827	14.5268	14.7182	14.1342	14.8027	15.0049	14.7485	15.6055	14.0068	16.1025	13.8401	15.4161	14.9497	15.6497	14.4537	14.8025	10.5209	13.324	14.4609	13.639	15.1692	13.6658	14.15	14.0637	12.9632	15.8699	15.3133	15.0547	15.3095	13.8635	15.4858	14.9362	14.757	14.4897	14.2473	15.0963	13.767	15.6979	15.6322
LRP3	ENSG00000130881.12	mRNA	16.809	18.8601	18.6005	17.2202	17.3949	19.3009	18.3514	17.0478	18.3726	19.2225	18.0772	17.3928	18.0434	18.4296	17.7823	18.2856	17.4068	18.459	18.4357	17.5102	18.3705	16.7777	17.8422	19.227	18.8831	18.3707	18.3876	18.4077	17.7587	17.6002	18.5355	17.4889	18.6686	19.0326	19.1667	17.8763	17.8821	18.1841	18.6084	17.7836	18.0929	16.4684	19.399	18.469	18.7207	18.8229	18.1611
LRRC3	ENSG00000160233.7	mRNA	13.7089	14.2881	11.2085	12.6197	11.7702	12.3794	11.3029	11.3598	9.8166	11.1111	12.0275	11.138	12.2258	10.5722	11.6785	10.6822	10.0601	11.8546	12.1103	11.5917	13.1261	10.2173	9.95588	11.2815	10.0591	10.278	10.8545	10.7733	10.0282	11.3875	10.5966	12.455	11.7475	11.1887	9.95604	11.6349	10.9019	11.9042	12.7011	11.1438	11.4528	11.1436	10.432	11.6122	10.4246	11.3405	11.3936
LRRC39	ENSG00000122477.11	mRNA	14.0111	14.5233	15.2142	15.9307	15.4523	12.524	16.2107	12.3134	14.4388	15.7705	15.4448	15.2647	14.2737	14.8424	16.2931	14.9459	14.8083	14.6696	15.3237	12.999	14.4042	14.7757	13.3887	14.8716	13.5769	12.6252	13.8422	14.1516	14.5663	13.3452	15.0188	13.9619	15.6343	13.0042	14.5398	15.1941	15.6363	14.8134	13.908	14.4653	15.3002	13.8849	13.9202	13.3414	13.3877	14.4045	12.7372
LRRC66	ENSG00000188993.3	mRNA	12.3999	12.9596	13.6273	14.1571	13.8112	11.7834	13.3308	11.7497	14.2935	13.9014	12.8969	18.7395	12.4704	13.2972	13.6575	13.9226	13.4777	13.2484	11.8862	11.5481	14.4356	13.0351	12.5946	15.9426	13.2615	12.337	12.1424	13.2045	12.4309	11.7468	12.9172	13.3733	13.5375	11.4814	13.4898	13.6403	13.1477	14.7851	12.73	15.6304	14.0302	13.0945	11.8121	13.0158	12.9881	13.6638	13.5016
LRRIQ3	ENSG00000162620.14	mRNA	11.1223	9.71212	8.67956	12.293	11.1928	10.1247	10.0479	11.9195	10.4228	10.9205	12.0349	8.75566	10.0426	10.8819	9.01569	9.98483	11.9078	9.66367	11.2269	11.525	13.222	12.3936	11.6602	10.3507	9.77129	10.8255	11.4588	10.4303	11.7059	12.2328	9.75662	11.1578	11.2255	11.6308	12.0935	11.547	10.2741	10.7839	10.3932	11.6655	9.98296	13.2913	10.5494	12.0701	13.0715	9.25568	9.73467
LRTM1	ENSG00000144771.7	mRNA	8.3454	10.3307	9.14578	9.20772	8.17251	10.2699	8.19677	9.70621	12.0528	0	8.1146	8.22434	11.2195	9.14143	0	7.93295	7.95415	0	7.91807	9.16134	0	0	0	9.64866	0	0	8.04825	0	8.74975	11.8174	0	9.53883	7.96998	8.9107	0	0	11.1033	0	0	0	10.2275	13.1902	7.93406	0	9.81222	8.02562	0
LSAMP	ENSG00000185565.10	mRNA	15.6829	18.1746	18.0731	14.7023	17.7229	17.5789	17.8248	16.3569	17.7509	17.353	18.4772	18.1322	17.7164	17.3406	18.104	18.6447	18.0011	19.138	17.9505	17.6404	19.0932	18.7336	17.6213	17.7907	16.7839	17.3293	17.5546	18.3793	17.2118	15.8278	17.357	16.3306	16.3702	18.7554	18.8426	17.6925	18.4132	17.4812	18.8993	18.813	18.6275	18.2891	17.9389	17.6217	17.3843	18.1287	18.5128
LTBP3	ENSG00000168056.13	mRNA	19.8116	18.5072	18.6933	20.2826	18.8124	19.392	19.52	20.2782	19.7246	19.0455	19.5239	18.8527	19.7845	18.6895	19.0594	19.0406	19.7898	18.5157	17.7022	19.7828	18.7167	18.1727	18.7495	18.0828	19.9326	18.3441	19.1919	20.9779	18.0036	17.7763	18.9897	20.4013	18.3096	19.1422	19.4738	19.3355	18.0559	19.781	19.4896	18.988	19.1992	18.2318	18.5341	19.1144	19.4492	19.1163	18.5017
LTBP4	ENSG00000090006.16	mRNA	18.0041	18.7839	17.085	16.7646	17.5939	16.8407	16.9387	18.487	19.6103	18.804	18.8781	15.9352	17.4083	16.553	16.388	18.2998	17.4832	18.3634	16.4617	16.2241	17.3072	16.6835	14.2609	17.8341	16.1496	16.8806	17.6452	20.1032	16.629	16.3424	17.3736	17.2323	17.6745	16.321	19.2795	16.2913	18.657	20.1484	18.3018	19.0012	15.7553	15.6992	17.7891	17.5022	18.1884	17.602	16.161
LUM	ENSG00000139329.4	mRNA	22.6942	17.6824	16.2459	23.18	19.7426	17.6009	17.4663	21.734	16.8157	16.6712	16.8689	16.2514	18.3574	18.1787	17.4826	16.4427	15.7236	16.6047	17.27	19.1498	16.6874	16.1462	13.9777	15.7217	15.3198	17.0625	17.6323	16.8539	18.305	17.6299	16.023	21.0469	15.7872	17.2233	16.0185	19.1967	14.4505	16.4149	17.2313	17.3472	15.8608	16.3347	16.5766	18.3343	16.2073	16.2395	17.5406
LXN	ENSG00000079257.6	mRNA	16.0231	17.8882	17.2292	16.7558	17.8771	16.9284	17.5217	16.8309	17.6642	17.5837	17.1208	17.2131	17.3405	17.7195	17.5624	17.317	16.3938	17.2345	16.3749	18.3211	16.7465	17.1577	15.4213	15.6524	15.747	16.4184	15.403	16.3704	15.6916	16.64	16.2102	16.7306	16.2726	17.091	16.5294	17.2141	14.1974	16.6593	14.7821	16.6576	18.4876	16.4837	16.3952	16.2025	14.8703	17.3213	17.0108
LY6E	ENSG00000160932.9	mRNA	21.276	20.1596	19.7932	21.2588	19.2575	20.3286	20.5466	20.6438	18.0386	18.3787	18.7409	18.0571	19.6981	19.3749	18.1805	18.8393	20.2393	16.8036	20.1055	19.7165	18.2877	16.5878	19.567	19.4549	21.9662	19.7485	19.7475	19.4012	19.8909	18.7943	19.3751	20.5811	20.9772	18.4613	17.7897	19.6036	20.4328	19.7519	18.5739	18.6545	18.9149	19.2149	18.0669	19.3139	18.9316	18.9061	21.0435
LY6K	ENSG00000160886.12	mRNA	12.6596	11.561	9.79086	9.85284	10.8143	10.9155	9.42492	12.9356	9.4781	10.406	11.3998	9.67464	8.28458	7.79141	7.54886	10.3815	11.724	9.36225	11.1437	6.81767	11.6801	0	8.17306	8.88089	9.01116	7.36175	9.27609	8.8087	11.4804	8.46713	9.77027	8.77116	10.3118	9.36325	11.9311	9.61721	11.7491	10.0902	7.86763	10.779	10.4583	10.4386	8.16415	10.4114	9.19605	6.68021	7.76536
LYPD1	ENSG00000150551.10	mRNA	18.1288	17.3954	18.448	17.9747	19.9861	20.2176	19.3592	19.5634	18.7259	19.9208	18.787	17.8925	20.0667	19.083	18.6657	17.7859	15.6038	17.9233	18.4653	20.3433	18.4054	19.5171	18.4706	19.3604	20.7994	21.3584	20.344	17.7492	19.3631	19.15	20.3448	19.7267	16.6772	18.7661	18.7167	18.6992	16.4029	17.5143	18.714	19.5941	20.3603	20.1062	19.5656	19.889	19.3689	19.222	20.3642
LYPD3	ENSG00000124466.8	mRNA	15.1716	11.4264	11.7223	14.6653	13.8734	12.1847	12.6927	13.7357	11.3837	11.3312	13.1127	11.8725	12.1874	11.8623	11.6857	12.165	13.0071	11.6302	12.0505	12.9492	10.8506	11.022	13.2452	12.9778	10.9162	11.8454	11.1815	12.5493	11.3996	13.1479	11.9683	13.5116	11.9957	13.0459	11.9528	11.6928	9.58727	12.5394	11.4536	12.8042	11.673	12.1867	11.0669	12.9697	12.842	11.6732	12.729
LZTS1	ENSG00000061337.14	mRNA	18.2369	17.7172	16.6151	17.8102	16.2987	18.108	18.0713	19.9574	16.3749	18.1815	16.6539	18.4184	19.2134	18.756	18.049	18.573	16.6655	17.0509	17.6622	19.7517	17.4097	15.8266	15.238	17.8148	18.5381	15.4127	18.6538	21.0154	15.9059	16.1381	17.7995	18.8541	16.4019	18.5967	16.9243	18.5845	15.3318	17.7985	15.9959	17.9358	16.1301	17.1636	18.0203	17.3347	18.9236	16.6418	17.776
MAFB	ENSG00000204103.3	mRNA	19.752	19.5312	17.3919	20.4745	20.2164	19.9112	19.5882	19.3836	18.3683	17.0271	19.7353	19.8129	18.4838	17.2651	18.3158	17.9496	18.4581	19.0932	18.3425	20.469	16.844	17.625	18.5635	18.8866	17.2521	18.7507	18.1678	19.6595	17.6945	19.2029	17.0555	20.917	18.7383	17.8234	18.3301	19.2898	17.1318	18.3712	17.0413	19.8549	15.9936	19.8958	17.3924	17.3116	18.4754	17.1487	17.2617
MAGEA11	ENSG00000185247.13	mRNA	0	0	0	7.08665	0	0	0	7.00154	0	0	0	0	0	7.02074	0	0	0	0	8.78608	0	0	0	0	0	0	0	6.92542	0	0	0	0	0	6.84751	0	0	0	0	0	0	7.10653	7.51997	0	0	0	7.10687	0	0
MAGEB2	ENSG00000099399.5	mRNA	9.90394	0	0	8.18675	8.1491	11.2458	8.17337	11.7969	8.22644	0	8.0912	0	0	9.70208	0	7.90956	0	8.11082	0	8.14045	0	10.0834	0	8.62703	8.75725	9.68521	8.02485	8.55486	0	9.79518	0	8.51734	7.94659	8.88726	0	0	7.91525	8.10272	0	0	0	0	0	8.16093	0	8.00222	8.0945
MAL2	ENSG00000147676.12	mRNA	15.4552	11.2859	13.8742	12.6144	13.6968	15.6933	10.9848	12.3271	11.038	13.4888	15.0282	12.9379	14.3523	14.6463	13.1205	10.7201	12.7408	13.2434	17.4066	14.0443	12.9192	8.9938	8.82563	13.415	7.66986	9.59418	13.2681	9.78344	15.4456	13.0949	13.0588	10.745	8.43871	11.9633	12.446	12.5554	14.835	9.81527	10.5612	7.12108	8.53064	9.21988	12.2061	13.5406	0	16.7942	13.1681
MAN1A1	ENSG00000111885.6	mRNA	18.3269	16.0901	15.7264	18.2171	18.3113	16.8303	16.9132	18.5306	14.882	15.7457	17.1918	16.0247	16.6202	15.3283	17.1956	14.3627	16.9226	15.6341	16.6204	17.3293	14.3348	14.5726	16.1373	16.6029	14.8964	17.7196	16.4572	17.603	16.4525	16.5914	14.0017	18.4209	17.034	15.763	16.5642	17.2466	15.5395	15.7646	14.6246	16.1629	14.4868	16.8296	14.5512	16.4507	16.7824	15.6592	14.9856
MAOB	ENSG00000069535.13	mRNA	19.3102	17.0177	20.6959	18.2146	20.5327	21.8936	20.495	19.2068	19.8511	20.8368	21.8102	20.2299	20.5035	18.8652	20.4917	19.898	21.3534	16.4534	19.5706	20.3158	20.3348	17.5863	23.0207	19.5846	19.056	20.2438	21.1216	20.2842	21.1242	22.8237	20.9635	20.5961	21.788	20.9392	21.6747	20.4446	19.0531	21.7481	14.7312	21.3538	17.2369	21.5441	20.2897	20.4274	18.7876	20.6251	20.4421
MAP1LC3B2	ENSG00000258102.2	mRNA	14.4871	13.8724	14.6294	13.9784	14.7513	14.969	13.9169	14.3712	14.1098	14.1863	14.4275	15.4369	14.1581	13.8141	14.3813	15.8354	14.0945	15.0799	15.1973	14.645	14.9803	15.0354	14.1545	14.8111	14.2922	14.7192	14.64	13.8763	15.7884	14.4667	13.6171	13.5086	14.2823	15.4011	15.479	14.9097	15.9649	14.8336	15.1021	15.0334	13.2911	14.0073	15.4215	14.2696	14.5109	15.1753	13.862
MAP2K6	ENSG00000108984.12	mRNA	13.4012	14.2114	15.6205	14.3575	14.6385	14.099	13.7486	13.6114	14.0885	13.5773	13.453	13.4682	12.3835	13.9158	12.9215	13.0095	14.0953	14.2387	14.0163	13.7469	13.8375	15.2838	15.0628	14.7456	14.4113	14.4838	13.0343	13.0993	14.1082	15.254	14.178	13.3541	16.0018	13.9109	13.8137	13.8763	14.3171	13.5363	13.6823	13.8667	14.2449	14.2202	13.4447	14.0485	13.8967	12.9395	14.3613
MAP3K2	ENSG00000169967.15	mRNA	16.9947	16.1918	16.2695	17.3344	17.0997	16.0802	16.4335	16.4222	16.0334	15.9354	16.4645	16.5527	16.6043	16.3936	16.3994	16.9182	16.7999	16.2967	16.1855	16.4864	16.3416	16.7544	16.683	15.8983	16.3098	16.1735	16.0804	16.7373	16.7128	17.2701	15.7964	16.8999	16.8002	16.2433	16.8632	17.0491	16.8755	16.7658	16.4319	16.9582	16.5015	16.7408	16.0126	16.4347	16.3035	16.3957	16.2067
MAP3K8	ENSG00000107968.8	mRNA	17.8108	15.6238	15.1384	17.002	17.947	16.2538	16.5029	15.6142	15.3503	14.7368	16.7059	15.3879	15.9303	14.2021	14.7978	14.5236	15.3746	15.8985	15.922	17.7537	14.6665	13.8278	14.8451	15.3508	13.985	16.2535	15.4579	16.3698	16.2655	17.6601	14.7525	16.6444	15.0368	15.2775	15.4142	16.6626	13.8773	14.7371	13.5385	16.4979	14.0112	17.1015	13.4849	14.3955	15.4246	13.7895	14.4978
MAP7	ENSG00000135525.17	mRNA	16.9832	13.4927	15.9907	14.5884	16.0438	16.255	16.8436	16.2976	15.6993	15.3972	17.2882	15.1992	16.0353	15.1318	16.9882	15.3595	17.0741	15.1417	17.4784	16.0529	12.5739	14.5526	15.3376	17.2659	15.9263	14.9804	15.2496	16.524	15.7426	15.453	14.4343	15.7063	16.4374	16.0916	18.0156	14.8529	16.0697	16.5202	14.8724	15.9709	13.9576	15.6949	14.735	15.0232	15.441	15.7676	13.0452
MAPK4	ENSG00000141639.10	mRNA	16.4249	16.4298	18.4049	15.0616	19.5828	19.9523	18.8295	16.2023	17.378	17.6571	19.5447	17.7747	16.9361	15.872	17.3238	16.9864	18.6871	17.7812	18.1343	17.6478	17.1548	16.5048	20.1869	18.4426	15.0847	19.355	17.4819	19.1888	16.6761	16.8352	17.2766	18.5562	19.5862	19.0408	19.6181	17.295	17.5767	19.3724	17.1768	18.5998	18.6367	19.2079	15.7072	18.0735	19.8019	18.1447	16.1505
MAPK7	ENSG00000166484.18	mRNA	16.8415	17.4372	17.3082	17.0792	17.0073	17.6237	16.8498	17.2275	17.4898	17.1688	17.1818	17.3921	17.1449	16.722	17.1091	16.5893	17.5849	17.346	16.959	16.9597	17.9979	16.9193	17.2134	17.4972	17.3787	16.9804	17.3012	17.4037	16.297	16.3296	17.5425	18.0398	17.7502	17.7566	16.8426	16.4466	17.4985	18.06	16.9864	16.9648	16.566	17.3639	17.1369	16.6896	17.7455	16.9725	17.2341
MAPRE3	ENSG00000084764.9	mRNA	18.1582	17.9776	18.1732	17.6254	19.0025	18.9573	18.3242	18.2531	18.3597	18.2668	18.693	18.104	18.6056	17.8355	17.9143	18.337	18.1692	18.2981	20.2478	18.561	18.8824	18.0177	18.8485	18.9242	17.8722	18.271	18.1412	17.7719	18.333	18.2733	18.1229	18.8364	17.6703	18.1208	18.4501	18.4341	18.272	17.5391	18.69	18.2381	18.0845	19.3174	18.2776	17.8624	18.0647	19.1034	17.5348
MAPT	ENSG00000186868.14	mRNA	14.8719	18.7953	18.0002	13.5244	16.9421	17.9982	17.1318	14.5896	18.2452	18.2409	17.0781	18.4463	17.0482	17.4964	17.9265	17.3008	18.5168	18.7547	18.8221	16.375	18.6802	19.1333	18.1996	18.8679	17.7543	17.0216	17.4141	16.686	17.0948	16.2601	17.8239	14.2143	17.5508	18.7928	18.7077	16.5298	19.3051	18.3286	19.2904	18.4396	19.2666	19.0233	18.5452	17.7859	16.5141	19.0011	17.7922
MARVELD2	ENSG00000152939.13	mRNA	13.399	13.0516	12.1588	12.5542	12.5615	13.0997	13.5059	11.5788	13.7146	14.1467	14.4233	12.1458	12.1756	13.065	13.939	14.3483	13.6144	12.8582	12.8383	13.5637	11.2536	12.5647	12.2157	12.6623	13.1262	13.8063	11.1153	13.5459	12.0723	11.7124	13.9813	14.8741	12.1433	14.1057	14.6843	13.3962	12.6263	13.4113	12.0466	13.0063	13.5675	11.8332	12.5852	15.0386	13.6415	13.4028	12.7881
MATN3	ENSG00000132031.11	mRNA	17.2435	13.9614	15.0671	15.6959	15.5348	16.1119	16.7403	20.3515	15.1261	15.7737	16.069	15.1614	15.7302	14.8057	15.7415	16.6046	13.6856	15.4235	15.9209	16.5037	14.5676	15.6677	16.0017	15.6922	16.1754	17.2593	15.0316	14.9984	15.0268	13.6475	15.0525	13.7498	14.6019	15.5491	16.3681	15.3098	14.8445	15.9513	13.8967	15.0938	14.5099	15.156	14.0805	16.171	13.8781	15.6905	15.6315
MBD5	ENSG00000204406.10	mRNA	14.8391	14.8068	14.8736	14.7417	14.4997	14.4985	14.6141	14.7164	14.4536	14.7087	15.1332	15.0172	14.5594	14.8173	15.1228	15.4965	14.9855	15.3278	14.7865	14.8588	14.6819	15.7684	15.2056	15.0161	15.4728	14.0973	14.8646	15.273	14.4434	14.6654	14.6941	14.9775	14.1021	14.9558	15.0956	14.7191	15.9644	14.7439	15.1548	15.0187	15.0029	14.7837	15.1323	14.8763	14.5539	15.2678	15.1893
MBP	ENSG00000197971.13	mRNA	17.3158	15.5	16.6294	18.2482	19.6966	20.1396	21.9001	18.462	16.0435	19.3032	21.1033	18.8653	17.917	18.6043	19.9487	15.9989	19.3271	20.2266	22.8259	17.6633	17.9022	17.2179	15.9054	23.0946	16.096	16.6703	18.0126	17.0448	18.9218	15.4508	15.5918	16.0696	20.8033	15.0481	22.8176	19.0698	19.2716	18.9211	15.9198	18.9452	14.2566	16.2895	17.6095	14.8832	15.995	18.5055	15.1106
MCAM	ENSG00000076706.13	mRNA	19.2787	19.2981	18.5377	19.1679	18.7261	18.7887	18.1915	19.2677	18.8343	18.8397	18.6919	19.34	19.8461	18.8224	19.4956	18.8591	18.2963	19.2991	18.9365	19.1794	18.7747	18.9259	16.718	18.3104	17.7303	18.6061	18.3889	18.3442	17.897	17.8176	19.5252	18.9201	18.2756	19.0893	18.1316	18.3084	18.0089	18.966	19.1977	19.0222	20.0459	18.382	19.3388	19.7425	18.2352	19.4848	19.3013
MCFD2	ENSG00000180398.10	mRNA	19.7349	18.6816	18.9098	19.4381	19.2696	18.5824	19.4343	19.9456	18.1874	17.9389	19.3665	18.5493	19.3883	19.0289	18.8761	18.7607	18.7618	18.4283	19.0736	20.1462	18.2435	18.8634	19.4741	18.5213	19.3709	18.8362	19.1771	19.4997	19.4583	19.5742	18.5032	19.5996	18.7553	19.1356	18.7566	19.6341	19.3406	18.5869	19.2744	19.0384	18.5052	18.6268	18.6662	18.91	19.39	18.6119	19.0863
MCM5	ENSG00000100297.14	mRNA	17.6099	18.1245	18.116	18.53	16.595	18.5102	18.1311	18.2055	17.3831	17.2953	16.4966	17.4553	16.5987	17.1962	17.1273	17.1613	17.7911	17.7869	16.653	17.8692	17.713	16.1465	17.7154	18.1803	18.3375	17.6607	17.4103	16.8715	16.4309	16.9759	17.3293	17.4375	18.74	18.0554	16.4868	17.4679	17.2332	17.5211	17.7535	16.6565	16.6763	17.1971	17.2365	17.6955	18.0897	17.1658	18.1369
MCTP2	ENSG00000140563.13	mRNA	14.6838	9.78224	8.91914	14.0987	13.3859	11.0423	9.40748	13.597	10.7034	7.27443	9.98328	8.88857	10.6302	8.56769	8.56496	9.9815	10.937	9.55601	10.5791	13.6164	8.68083	7.08187	10.0333	6.62711	7.33689	9.5813	9.33253	13.9496	10.1727	11.9123	8.45487	16.1802	8.25645	11.0638	9.00516	11.9577	10.029	8.09182	8.5069	11.8917	9.69615	8.62326	7.48675	10.0043	10.5141	9.44714	8.98801
MDGA1	ENSG00000112139.13	mRNA	15.2101	14.7917	15.5672	15.6916	14.0788	15.1226	14.4594	15.5787	14.6521	13.9537	16.233	15.7041	17.4649	15.7107	14.3229	14.4801	14.8769	14.8716	14.3286	15.755	13.9752	14.2826	15.8853	16.4924	13.146	14.2583	15.2549	15.5626	13.7077	13.7364	15.8097	15.1036	13.4271	15.9247	14.3169	15.2348	12.77	14.5838	13.2958	15.3222	14.8644	15.1706	15.7959	15.1522	15.3059	15.6556	14.8462
MDK	ENSG00000110492.14	mRNA	20.5056	19.2579	20.8239	22.6117	21.1707	20.4075	20.0975	22.184	21.1164	21.2445	20.8254	20.7692	20.8847	21.0704	20.7651	20.2914	20.5125	19.2119	20.1486	20.6073	21.4637	17.6677	19.7152	20.9583	20.0985	21.3125	21.5203	19.654	21.1786	19.1023	20.9926	21.5662	20.442	19.3399	19.6396	22.0601	19.659	20.8557	19.2148	19.8144	20.4841	20.1889	21.2151	19.8657	21.0249	19.0659	20.9621
ME1	ENSG00000065833.8	mRNA	16.8605	14.9125	14.683	17.1546	17.9242	16.4175	15.6607	16.9232	14.189	14.9379	17.245	14.5894	15.7923	15.7323	15.7064	17.9557	14.8531	15.1217	17.8648	17.1013	18.9162	14.3736	12.4624	15.7667	13.3604	15.5774	14.878	14.1288	17.383	14.2032	13.6352	15.384	17.5426	13.8735	16.8926	16.2129	15.4906	14.389	17.3832	17.6185	13.5743	14.7101	14.096	15.2139	13.0904	16.2902	14.9715
ME3	ENSG00000151376.15	mRNA	15.8971	17.2187	16.2927	15.3422	17.3936	16.5076	17.1135	17.0534	17.1244	16.8445	16.976	16.3351	17.4304	16.8322	16.4513	16.2977	16.3475	17.2681	17.4118	16.5738	17.2294	16.3366	16.2546	16.6852	16.108	16.6518	16.7289	16.3503	17.3885	17.2162	16.5581	16.5409	17.4498	16.7958	17.1545	17.1551	16.6546	17.2683	14.1867	16.9027	16.5862	16.7523	16.657	16.229	16.6648	16.9649	16.4744
MED16	ENSG00000175221.13	mRNA	17.9765	18.6861	19.0212	17.9311	17.6683	19.3422	18.6448	18.5632	19.2263	19.0106	18.2996	17.9071	18.1235	19.3005	18.1327	18.8809	18.5825	19.1543	17.9135	18.157	18.5147	18.0041	18.2726	18.8458	19.4163	19.0012	18.5935	19.1915	18.0403	17.5461	18.9572	17.9259	17.6804	18.9865	18.7823	17.6733	18.3071	18.8378	18.8604	18.1374	18.2918	18.8099	19.2477	18.961	18.6327	19.1675	18.7393
MED7	ENSG00000155868.7	mRNA	16.5092	16.1948	16.0358	16.5063	16.8866	16.0045	16.0943	16.0512	16.0315	15.8385	16.476	16.3064	16.6171	15.943	16.3085	16.2551	16.0778	15.689	16.9859	16.6658	17.1066	16.3035	17.0833	16.4822	15.3497	16.4827	16.4745	16.075	17.6972	17.3873	16.0547	16.5619	15.6476	15.7118	16.6417	16.8386	16.7315	16.3892	15.5313	16.1113	15.9523	16.3328	16.1234	16.4246	16.3524	16.2523	16.4408
MESP1	ENSG00000166823.5	mRNA	14.7827	15.5614	14.6606	14.3661	15.0946	16.1474	15.6335	14.4696	15.219	15.6846	14.5948	14.4462	15.8433	14.8528	14.2918	14.6318	15.5916	15.2138	16.3948	15.473	15.1311	14.8825	15.6647	15.9242	16.6926	17.7773	15.381	14.4201	16.2795	16.1552	16.414	15.44	16.2446	15.3383	14.796	15.1502	15.6282	16.1913	15.2046	15.0022	15.1796	14.0913	15.9059	15.4996	16.188	14.8488	15.7704
MGLL	ENSG00000074416.12	mRNA	15.9944	17.5105	17.5122	17.0661	17.4959	18.4653	18.5337	17.4954	17.8212	17.2096	18.6569	17.1908	18.4331	17.7247	18.1333	17.2733	16.646	17.9217	18.2503	17.9752	17.4045	17.2496	16.7091	17.583	18.7595	18.1957	17.4645	17.6894	17.113	16.4772	18.2246	18.0531	17.9048	18.9555	18.0568	17.2123	16.3083	18.2194	18.8546	18.0293	18.2056	17.8783	18.5908	17.7886	17.986	18.579	18.3281
MGMT	ENSG00000170430.9	mRNA	17.4289	15.3325	16.026	16.3646	17.0772	16.0441	16.0882	16.8366	14.479	15.337	16.3686	14.1714	16.3758	13.7134	15.4146	13.9695	14.4466	15.2335	16.0737	15.9284	16.7759	13.983	16.1076	17.2094	16.1764	15.6167	15.7886	14.2019	15.4059	16.216	16.4633	16.1995	14.952	14.1157	15.0397	16.4729	15.5795	14.8608	16.4662	15.5621	13.9501	16.6748	15.3423	16.7672	14.4933	16.2432	16.5287
MIA	ENSG00000261857.5	mRNA	15.8311	11.2889	13.9475	11.9457	16.1761	0	10.7952	12.7223	13.7353	13.0397	15.9599	11.9599	10.6524	11.0052	12.5683	18.6096	8.23375	13.7317	13.3628	10.4405	15.4681	11.3868	0	11.5129	12.0584	13.7426	10.9091	12.3149	12.3492	10.6835	11.7662	12.2772	12.83	0	11.6398	10.2512	11.0214	9.40371	12.6662	11.8283	11.7298	10.1989	11.2094	12.7081	13.03	13.1082	9.39548
MICAL1	ENSG00000135596.16	mRNA	17.1737	17.0385	17.688	18.1631	17.8853	16.9463	17.3283	16.7724	17.8683	17.8268	17.3778	18.044	17.1026	16.8197	17.4502	17.6003	17.2251	18.5139	17.1904	17.0817	17.8851	16.2587	16.833	17.3379	16.114	15.9967	15.9415	16.898	16.2259	16.2875	16.9536	16.8845	17.2607	16.1133	17.2068	16.9239	16.7149	17.3671	17.5827	17.8128	16.1118	16.8404	16.4777	16.4164	16.3535	16.9106	16.0647
MICAL3	ENSG00000243156.6	mRNA	14.0748	13.91	13.6328	13.848	12.5825	13.7353	13.4816	13.9855	13.4762	14.4537	13.8868	15.4293	13.7943	14.1889	13.9681	14.4723	13.5474	15.748	14.6593	13.3372	14.7352	14.4365	14.6369	14.6028	14.2207	12.0978	13.9348	14.1111	12.4591	12.5758	12.6207	12.532	15.1219	14.536	14.4635	13.9303	14.2826	13.4289	15.5304	14.4289	13.2192	14.5861	14.7764	14.3981	14.4621	15.1238	14.5908
MIF	ENSG00000240972.1	mRNA	21.2839	20.1681	18.9625	19.9752	19.3883	20.134	20.817	20.6054	19.8647	20.9822	18.3919	19.3439	18.6077	18.703	18.3431	18.7901	18.6475	19.5045	19.4243	20.0268	20.2908	17.1118	18.8881	20.641	19.7429	20.0181	20.3487	19.6511	20.9149	20.6139	19.0572	19.1818	20.09	19.3123	18.9498	20.078	17.3328	19.3288	20.0076	18.3763	18.0168	20.236	19.8724	19.6472	20.6397	19.4178	18.9791
MILR1	ENSG00000271605.4	mRNA	17.2961	15.898	15.1457	18.5713	17.7335	16.813	17.4623	16.8262	16.3147	16.3455	17.6604	15.5922	16.0902	16.2225	17.0795	16.5878	16.7791	16.9681	16.5093	18.1403	14.4919	15.5523	16.3981	15.6196	16.0721	16.3924	16.0502	16.7825	16.778	17.3681	14.4932	16.9691	16.6829	15.1782	15.7465	17.2398	15.3054	15.3995	14.9725	16.0225	13.8705	16.6387	15.4521	15.2301	15.5676	15.1628	16.0397
MKX	ENSG00000150051.12	mRNA	15.32	12.1884	12.7235	11.0017	12.2855	11.7023	11.0663	10.206	10.3315	10.833	12.4904	10.7531	11.7627	11.5201	10.1072	13.5303	9.57605	11.5628	13.138	10.9553	8.9255	8.73483	11.2074	11.2733	10.2118	9.33502	13.0782	9.52424	14.2052	15.3498	8.94403	11.918	17.033	11.6633	11.7505	9.76678	11.6883	8.75014	8.43042	10.6594	11.0752	9.95938	9.36353	8.39447	11.6593	12.816	9.90997
MLF1	ENSG00000178053.16	mRNA	17.4739	15.9469	17.0468	16.5841	17.9152	18.048	16.7848	16.6924	16.9619	16.7786	17.8101	16.9056	17.6715	16.3201	17.1734	17.6552	17.2037	16.867	17.5215	16.725	18.5242	18.0158	17.2439	17.3968	16.7729	18.8146	18.186	17.1373	19.331	19.274	17.3528	17.3762	17.622	16.9884	17.8421	18.0154	17.8147	16.7756	17.0336	17.9106	17.5923	19.2028	17.5136	18.3277	18.5305	17.7914	16.8219
MLH3	ENSG00000119684.14	mRNA	14.6651	15.7934	15.7845	15.7474	15.3983	15.1444	15.4971	15.1285	15.8076	15.5138	15.8562	16.0015	16.0727	16.2492	16.2286	15.9891	16.2291	16.0427	15.379	15.6226	15.0662	15.8549	15.4525	15.2799	15.3514	14.7984	15.5582	16.0915	15.791	15.6502	16.0848	14.9341	15.5624	15.8168	15.4469	16.016	15.835	16.0868	15.3561	15.9097	15.5031	14.6799	16.1607	16.0042	15.3449	15.9223	15.9602
MMP15	ENSG00000102996.4	mRNA	14.7738	17.9321	17.6574	15.49	15.9588	16.6087	15.9573	16.3259	16.3499	17.727	16.4446	17.5507	16.549	16.7302	16.9454	16.7311	16.2063	17.6154	17.4221	16.3261	17.4995	17.1372	15.6092	18.3196	17.1645	15.8525	17.5864	16.1333	14.9737	15.058	18.0819	14.8833	17.2339	17.5594	16.673	15.9831	15.4385	17.1506	17.5964	18.1229	17.2487	17.9947	18.9821	16.8143	16.7469	17.249	16.0441
MMP17	ENSG00000198598.5	mRNA	16.6182	16.3479	15.8906	13.0177	15.4811	17.3019	12.8318	15.6086	13.9077	14.6694	15.4793	15.9481	15.7311	14.2853	14.4586	12.2337	13.7299	16.7458	17.1558	13.3913	16.569	13.5756	11.6	16.027	12.688	13.8453	16.747	15.2814	14.8684	15.0494	15.6431	12.4091	16.3631	14.0621	15.314	14.1555	14.0952	15.1929	17.0862	16.5549	13.8738	13.4704	14.0419	14.4344	14.9271	16.9388	13.4618
MMP28	ENSG00000271447.4	mRNA	16.231	16.8198	17.8445	15.2426	16.4324	17.5466	16.8482	15.8073	17.4021	16.8972	17.6492	16.8759	17.0113	17.6439	17.388	16.8171	17.4522	17.2434	16.884	17.1131	14.9047	15.7136	19.7378	16.5636	16.5407	16.8751	14.8638	15.9129	15.2959	15.1052	16.3587	17.4685	16.3772	17.2767	16.0741	15.8527	17.3759	17.3962	13.4726	16.3017	18.3174	16.4025	15.6878	16.0762	13.5838	16.6525	16.9704
MMP7	ENSG00000137673.7	mRNA	20.0615	15.9391	10.5917	16.3003	18.1991	18.9061	14.485	15.8617	18.9982	12.9172	13.3645	13.7547	17.411	11.7568	13.1242	12.1823	13.9352	12.2208	20.3881	13.2213	16.2938	12.8753	13.1397	13.139	11.3954	13.284	14.2047	15.1719	14.8087	14.394	11.2229	20.1557	16.2062	15.4949	15.9842	16.4504	11.9043	16.5657	10.8337	15.0992	11.0896	16.0605	10.9614	11.5343	14.1811	9.79121	15.5433
MNX1	ENSG00000130675.13	mRNA	7.93934	15.2937	12.6186	7.80424	6.77324	10.4472	10.1076	0	11.5385	10.478	0	13.8345	0	8.32085	7.49564	12.6072	9.12836	13.2453	13.9965	6.76464	11.7641	11.2836	12.8152	12.4491	8.95776	7.30857	9.22266	10.8682	11.2464	0	10.2309	7.13965	8.14677	12.0241	11.5366	11.1475	13.0012	10.7143	14.2756	13.8403	7.24342	8.51351	8.52457	9.94326	6.83088	13.6127	8.29476
MOB3B	ENSG00000120162.9	mRNA	15.0249	17.2421	17.5699	13.9507	15.8213	16.0787	15.8231	14.8345	14.7202	14.6177	15.1499	16.7875	15.0498	15.7188	16.5829	15.1663	16.3278	17.886	16.4716	15.2942	17.1958	16.2927	17.5957	17.7038	16.5524	16.9073	16.1804	16.5228	14.8328	15.1633	16.4016	16.074	16.5057	16.3845	16.6167	16.3176	17.4541	15.7325	17.5412	16.5922	16.4252	17.057	14.9638	15.0973	15.386	14.63	16.3076
MOCOS	ENSG00000075643.5	mRNA	16.982	9.60706	12.6638	16.0381	12.8807	13.1394	11.2925	15.679	12.4077	11.6701	12.389	11.2327	14.4323	11.1521	13.8444	12.2253	13.9999	12.2505	12.7062	15.0449	14.1756	11.1188	11.3765	9.98279	14.0474	12.1122	12.1001	13.7165	13.4173	12.2222	11.0834	14.3309	11.9314	11.4754	11.4422	14.9127	8.53418	14.0584	9.92993	12.7138	10.7423	11.3896	12.5409	12.0252	14.121	13.0215	12.4654
MON1B	ENSG00000103111.13	mRNA	17.1002	17.3011	17.233	17.122	17.2243	16.8512	17.5569	17.3579	17.2625	16.9727	17.4569	17.5019	17.7729	17.3386	17.6822	17.6725	17.4681	17.6986	17.4655	17.5432	17.7233	17.085	16.8901	17.3063	17.039	16.35	17.3103	17.7904	16.8374	16.5134	17.2176	16.8727	17.2508	17.7239	18.1434	17.266	18.028	17.5863	17.6836	17.7862	17.3362	17.4846	17.4772	17.578	17.7355	17.6701	16.6257
MPV17L	ENSG00000156968.8	mRNA	15.2629	15.8786	16.0885	14.817	17.3134	14.989	16.3886	14.8507	16.4915	16.2293	15.907	15.1352	16.8728	17.0235	15.917	16.9021	16.475	15.1125	15.9772	17.0207	16.3844	15.8825	15.3151	15.9521	16.5227	16.7692	15.7559	15.9502	17.2066	16.5642	17.0383	15.7707	15.2791	16.9156	16.906	16.3507	13.2761	15.6466	15.4289	16.0994	15.4926	15.8285	16.9588	17.5659	16.0266	17.6673	14.7742
MPZL2	ENSG00000149573.7	mRNA	15.2355	14.6319	13.1127	14.6535	15.0661	14.1429	13.8259	15.4291	13.5548	14.0181	14.1092	14.6622	15.9415	14.3416	15.3625	14.9454	14.0911	13.4266	14.7489	15.0654	14.9209	13.8058	11.9371	14.3836	13.9736	13.6296	15.2124	15.3556	15.4138	15.2318	15.5212	16.114	14.7884	15.4517	15.3157	14.8354	11.8073	15.3431	14.5431	14.24	14.0335	13.5924	14.2195	16.2523	14.2625	15.1662	14.7849
MSLN	ENSG00000102854.13	mRNA	17.0355	11.4401	10.576	13.9103	15.256	16.7006	15.905	13.6104	12.5947	11.8838	16.7637	11.1825	11.9551	12.1016	13.307	12.8896	15.7378	15.6102	15.293	15.4815	10.9744	11.6899	12.1993	13.0383	9.04208	13.8019	16.0121	14.8023	12.1786	11.8867	12.037	11.2589	14.9811	11.9774	12.6913	13.0388	11.4431	11.9068	11.4779	13.7911	11.3633	15.0535	13.9451	10.7641	16.5016	12.9546	10.3757
MST1R	ENSG00000164078.11	mRNA	9.78323	10.5273	11.9689	11.0002	11.6086	11.5399	10.2711	9.20004	12.0397	12.4285	10.7732	11.1913	10.3208	10.2181	11.6898	10.5206	12.3278	12.4444	12.09	9.60131	8.98528	12.0771	10.209	10.5035	10.3711	7.98336	7.90449	9.65436	10.603	10.2589	10.9086	11.7149	11.043	10.3494	10.4784	11.5625	11.4894	10.5625	10.657	12.1688	10.9128	10.0636	10.5921	9.91101	10.5848	9.99263	8.70879
MTCP1	ENSG00000214827.8	mRNA	13.3314	13.1787	13.0848	15.0436	13.8509	12.5223	13.3415	13.5429	13.4372	13.4705	12.778	12.8881	13.22	12.508	13.1486	13.4369	13.6612	12.7673	12.6682	13.3085	13.2547	11.5115	12.6646	11.8181	12.5049	13.899	12.3744	12.6124	13.6628	14.4083	13.2317	13.7702	13.2376	12.6352	12.7054	14.4791	13.2061	13.7894	12.1065	13.3533	13.4529	13.6251	11.9188	12.3505	14.5088	11.8043	12.6558
MTHFS	ENSG00000136371.8	mRNA	16.5162	14.5785	15.0766	14.5189	15.2529	16.651	15.6317	16.1035	15.1554	15.3109	15.1099	14.6513	15.5749	14.9279	14.5792	14.8718	15.8053	14.8665	15.3028	16.0749	13.9533	13.8691	15.4167	14.0948	15.5408	16.953	16.0596	15.3886	16.8573	16.8446	15.8934	16.0165	16.1491	15.426	15.8383	15.8142	13.7469	16.1377	14.5114	15.2038	15.0069	15.1337	14.7171	14.4753	16.0083	14.9985	15.2287
MTSS1	ENSG00000170873.17	mRNA	16.6684	20.0939	18.1228	17.1057	17.0912	16.8435	16.9444	15.9766	16.2986	17.547	17.1568	18.7538	16.7919	17.4824	17.6228	16.3627	16.9153	18.6531	17.8849	16.639	18.7044	17.5891	17.5651	18.4286	17.2501	16.7989	17.4612	16.7629	16.3938	16.1325	17.0506	17.7298	17.2736	18.2101	17.1135	16.9101	17.4105	15.9287	18.4666	17.55	16.4597	17.596	17.8242	17.304	16.4511	17.6267	18.3079
MTTP	ENSG00000138823.11	mRNA	13.9816	12.3888	14.061	11.6463	15.7672	16.1292	14.224	16.1725	14.211	13.6805	17.3121	13.5276	14.9455	13.8459	17.491	14.1639	16.4392	10.8205	13.0623	15.0157	12.2651	13.0918	16.891	12.7851	12.5634	13.9826	16.3548	15.471	16.5167	14.6332	14.4653	15.9775	16.5229	17.1111	16.282	14.6268	19.3981	16.4074	14.9897	14.7829	15.1393	16.0083	11.018	11.166	16.2545	12.1095	12.0721
MTUS1	ENSG00000129422.12	mRNA	15.4338	16.2118	17.0504	15.6772	17.2721	16.747	17.6605	16.2482	16.7261	16.3121	17.4808	16.389	16.5225	17.1566	17.306	16.8054	16.5161	16.1622	17.1725	17.0444	15.9003	15.4215	17.3493	17.0922	16.1368	16.4891	16.5131	16.7059	16.4998	16.2164	15.9823	16.5671	16.9664	17.1086	18.0143	16.4594	16.9953	16.5079	15.2572	17.0775	17.4044	16.7549	16.2635	16.6351	14.7543	16.3263	16.0535
MUC1	ENSG00000185499.15	mRNA	16.9871	14.7049	14.4516	17.3478	15.86	16.1291	16.9018	16.3364	17.2388	17.1979	17.081	16.1047	16.3786	15.2476	16.0056	15.7494	15.7685	15.6263	13.9229	15.752	14.8654	15.7981	14.9403	14.0384	14.773	15.3567	15.6657	15.814	15.9502	16.3669	16.3612	18.4474	14.6236	15.6866	16.571	16.0171	14.5133	17.5897	16.0463	16.0282	16.1439	15.1925	14.6758	15.1788	17.2466	14.9134	13.1679
MXD4	ENSG00000123933.13	mRNA	17.5957	18.7024	17.4429	18.5085	18.4477	18.6405	18.7867	17.9056	18.4908	18.3918	18.8179	17.8928	17.8623	18.0436	17.8844	18.2925	17.9319	18.8703	18.5644	18.3072	18.4101	18.8341	18.5713	19.175	18.0832	18.6578	17.9937	18.0658	17.9405	17.455	18.475	17.5284	17.4551	18.6425	18.5491	17.5955	18.3004	18.0904	18.0266	18.2788	18.2221	18.1827	18.031	18.152	17.7812	18.0702	18.2597
MYC	ENSG00000136997.13	mRNA	20.226	20.3699	18.8512	19.0211	17.5357	18.3581	17.5885	18.768	17.7495	18.7483	17.964	18.1818	19.2033	18.7528	17.1594	18.1669	16.798	19.6248	17.1311	19.5087	18.4534	18.2005	16.129	17.9717	17.4776	16.686	18.2656	19.1942	17.9474	16.9985	18.3585	19.6761	17.8286	18.8833	17.4878	18.2105	17.8912	18.0177	20.5581	19.6657	17.8894	17.7026	18.1899	18.047	18.1287	17.5951	17.7406
MYL9	ENSG00000101335.8	mRNA	23.1299	18.7656	17.6121	21.0301	19.056	19.8002	19.3536	19.4016	17.9842	18.2209	19.0881	18.4895	19.7239	18.3342	18.7763	17.3292	18.0516	18.6726	19.1503	18.7419	19.8095	17.5114	16.7892	18.5791	18.2325	17.7119	19.4723	18.6822	19.522	17.924	19.467	20.8108	18.7273	18.2815	19.0323	18.0946	16.9251	18.761	18.0094	18.4534	19.0096	17.2643	18.3333	20.3265	19.6395	18.7222	18.0114
MYLK3	ENSG00000140795.11	mRNA	10.6122	9.66967	10.7658	10.3736	9.82932	11.1411	9.30688	9.62112	9.82893	9.41437	10.9487	10.4908	8.46537	9.87465	10.0093	10.2947	12.2064	10.3499	11.8946	10.096	9.82607	11.9777	11.7249	10.2303	10.5126	9.12185	8.91751	10.158	11.0663	10.2306	8.5388	9.41075	11.1321	10.9646	9.91001	9.70533	9.73906	8.53715	9.79928	9.88707	9.86259	14.8634	9.34268	7.59914	10.0317	11.4773	9.52697
MYO1D	ENSG00000176658.15	mRNA	15.8118	15.0386	13.7507	16.3222	15.3503	15.2911	15.6147	15.6277	13.7145	13.8305	15.3941	14.7595	15.707	14.3312	15.2717	14.6232	14.8546	15.1812	16.0098	15.1552	14.3971	14.0395	13.083	16.5773	12.9154	14.092	14.2579	14.66	13.4427	13.6856	14.1886	16.5453	15.5716	14.6748	16.1786	14.1845	14.7353	14.539	14.5425	15.7319	14.2827	13.8077	14.447	15.7432	13.1957	14.9356	14.2742
MYO1E	ENSG00000157483.7	mRNA	17.7857	15.4181	16.1842	17.4777	16.3594	16.4108	17.2456	17.3097	15.526	16.023	16.5988	16.3518	17.3806	16.8055	17.0917	16.4564	16.2939	16.4035	15.7574	16.7237	15.4293	15.4216	15.1195	15.8293	16.1967	15.0103	16.406	17.6581	15.8634	15.8426	15.8337	17.9977	17.0649	16.5569	16.7579	16.7987	16.9477	17.1134	15.1861	15.4215	16.852	15.4653	15.2187	16.3764	17.4308	16.3818	15.6352
MYO5C	ENSG00000128833.11	mRNA	13.957	12.6098	16.4384	12.9329	13.4915	16.0957	13.44	12.6447	15.0459	15.3913	14.4917	12.6634	13.896	15.7926	14.6566	15.8033	17.2128	13.7818	13.4762	14.2523	12.276	13.2223	14.0405	12.1918	16.061	13.9906	14.9094	13.7863	14.8728	16.7834	16.3326	15.1105	16.632	15.0503	16.655	11.9343	16.3991	15.4118	12.0587	13.7052	15.3297	13.7811	12.7792	14.309	15.3937	13.6996	15.0882
MYO7B	ENSG00000169994.17	mRNA	9.77557	11.2892	11.799	11.4598	11.8437	12.2545	9.96729	9.10764	14.052	13.8646	10.337	11.604	9.16253	10.3099	9.94623	11.9613	15.1697	13.27	15.6658	9.68664	14.3774	11.539	12.4059	12.0313	11.2583	11.3628	10.5698	9.42461	11.5209	12.1508	11.5142	10.386	13.0679	10.7921	14.5229	10.2515	12.1596	14.7841	12.8914	14.1438	10.9755	11.0288	12.7398	12.8452	9.45422	13.7361	12.7988
MYPN	ENSG00000138347.14	mRNA	10.3559	7.8578	6.0097	7.64139	8.3378	0	7.62803	8.77408	7.68102	7.73516	7.54599	8.0688	7.89894	8.30926	7.33297	7.36468	7.38584	7.97872	8.92889	8.00834	0	8.95242	7.37467	8.8159	0	0	8.21349	6.43518	7.59777	7.66806	6.17921	6.398	11.235	5.77813	7.88679	5.8387	7.37036	5.98777	9.06203	9.0719	8.0756	8.76428	7.36579	7.03433	8.07492	9.56632	6.96818
MYSM1	ENSG00000162601.8	mRNA	15.8863	14.8014	15.475	16.2147	16.4377	14.5537	15.5315	14.755	16.0038	16.143	15.4972	16.6954	16.0435	16.3653	16.107	17.1726	15.5644	16.2177	15.342	14.9617	15.7642	16.0144	15.2352	14.844	15.461	13.6864	14.4443	15.4225	15.8629	15.8753	15.5054	15.0877	15.3718	15.6851	16.0502	16.3963	16.1583	15.8095	15.7972	15.8336	16.3311	14.7487	14.7605	15.2453	15.5654	16.0974	15.4508
MYT1L	ENSG00000186487.16	mRNA	12.7792	14.06	13.924	7.48943	12.0645	14.6066	9.54028	6.67286	9.90123	12.1847	14.159	12.8321	13.2079	13.8279	12.3008	9.20558	11.6444	12.3219	16.4657	12.0675	12.846	10.6456	12.571	16.2485	8.73496	8.66468	11.8553	9.43765	13.5145	10.6301	11.6622	8.49506	8.24508	11.7327	12.8491	12.9349	14.3908	10.5679	10.6299	12.8307	9.18299	14.4462	10.4683	11.5264	7.50969	14.8902	10.6224
MYZAP	ENSG00000263155.4	mRNA	13.4028	12.1728	15.3449	12.1563	14.2946	14.861	12.4532	9.01414	14.4709	12.5608	13.5249	14.1558	12.3103	11.7681	12.0603	13.4239	15.0101	13.8284	12.0267	12.9253	14.1886	12.8721	14.8878	13.5977	9.67099	13.1433	11.672	14.9038	13.9602	17.92	12.3773	14.0918	15.6287	13.1216	15.4626	13.2987	12.9677	14.3105	13.9818	13.1762	12.5334	13.0986	11.8204	13.2413	13.942	15.2812	11.7419
N4BP1	ENSG00000102921.6	mRNA	16.8549	16.9509	16.8578	17.2014	16.553	16.3103	17.0128	16.8826	16.8306	17.0196	16.7645	16.9202	16.877	16.7424	16.8958	16.9852	16.8274	17.0484	16.4661	16.698	16.6889	16.644	16.1388	16.5734	17.0402	15.4767	16.852	17.4405	16.3035	16.2514	16.7008	16.5438	16.9483	16.7163	17.3081	16.8044	17.5344	16.995	17.0331	16.2998	16.8401	16.4227	16.5897	16.8001	17.0784	16.8646	16.2413
NAAA	ENSG00000138744.13	mRNA	16.6044	15.1905	14.2501	17.5724	16.731	16.7699	17.126	17.0505	16.5284	15.9713	16.482	15.4129	16.1761	16.4928	15.5364	16.3632	15.7839	15.5002	16.0736	16.3399	14.476	14.5667	17.1444	15.8191	14.76	16.4281	15.0693	16.286	15.9502	16.2781	15.6739	16.7055	15.4136	15.2569	15.801	16.3249	14.2789	15.7206	14.19	15.5964	16.429	16.2943	15.4094	16.7856	15.5204	15.763	16.1392
NAGS	ENSG00000161653.9	mRNA	14.8829	14.1858	14.1303	13.6202	14.9783	14.8619	14.127	15.0346	13.9356	12.926	14.4362	14.3751	14.3958	12.7654	13.8565	13.6018	14.3914	14.1034	14.2186	15.0739	13.1267	13.973	13.0814	15.0134	13.4679	15.3577	13.8536	15.1251	13.7462	15.0063	14.052	15.2273	13.8861	14.6292	15.1225	14.5457	12.7722	15.242	12.6679	13.9922	14.6786	14.1995	12.1397	13.8541	14.8844	14.6132	14.302
NAT8	ENSG00000144035.3	mRNA	10.6689	9.75148	12.586	11.2699	0	11.0115	0	0	9.98867	11.6271	10.4375	10.5476	8.79437	11.2036	10.2234	11.2547	12.7781	12.0415	10.6551	10.9017	10.4549	10.8485	11.2648	9.39115	12.3272	0	10.7857	11.639	12.0738	9.56109	10.0587	9.28135	10.7072	8.65342	9.78055	9.71322	11.6753	10.8639	0	10.9682	12.3838	11.6596	10.6712	0	9.96923	10.763	9.8564
NAV1	ENSG00000134369.14	mRNA	15.2847	16.9194	17.2502	17.6211	16.0169	16.0396	15.6835	16.4421	16.1768	16.24	16.689	17.3207	16.6009	16.3443	16.9128	17.4202	15.6264	17.2414	15.9615	15.5594	17.6734	17.6329	15.4853	16.6939	16.9546	15.0912	16.3342	16.7937	15.2644	14.5918	17.1132	15.9453	15.349	16.849	16.3279	16.41	16.4659	16.1396	17.4665	16.9796	16.8091	17.1493	17.2277	17.1526	15.1645	17.8384	16.7687
NBPF4	ENSG00000196427.12	mRNA	0	7.30964	0	8.50211	0	9.56346	0	7.42081	0	0	0	0	7.3507	0	0	0	0	0	8.79316	0	13.1747	0	7.23951	0	0	0	0	0	8.04472	0	0	0	7.26647	0	0	8.2669	0	9.00158	9.83179	0	0	7.63223	0	0	7.52635	0	0
NCAPG2	ENSG00000146918.18	mRNA	16.2885	16.986	16.943	16.9235	15.8303	17.0343	16.6863	17.5213	16.3706	16.1999	15.5847	17.7734	16.0963	16.6727	16.9784	16.5531	17.7429	16.2033	16.3283	16.2036	16.9946	16.7877	17.3542	16.6904	17.5407	17.0343	16.8542	15.6716	15.4253	15.3553	17.236	16.6706	18.0967	16.9819	15.8497	16.5543	17.7332	17.8465	16.7978	16.8213	16.7504	16.7104	17.5739	16.6864	17.4943	16.7576	17.7804
NCCRP1	ENSG00000188505.4	mRNA	9.6073	11.3882	7.82912	12.207	11.1696	9.94969	7.87753	10.7999	9.92612	10.3021	10.1121	8.90206	10.8992	8.8216	8.57844	9.19399	9.21525	9.81022	7.59908	9.42541	10.714	0	8.62028	8.33088	9.45898	0	9.30956	0	0	10.0829	9.58163	8.22126	9.96712	9.91066	8.71973	11.4568	10.1985	9.3876	8.89799	10.228	0	11.0123	9.93108	10.1821	8.90819	10.0229	0
NCF2	ENSG00000116701.13	mRNA	18.6525	16.9495	16.1994	18.8277	18.4479	17.4103	18.0094	17.7801	16.1137	15.5112	17.8551	16.5811	17.5399	16.3078	17.7333	16.3215	17.7291	17.1496	16.9206	17.9634	14.9547	15.6456	16.4495	16.8924	16.3131	17.7002	16.7803	18.2955	16.2947	17.4444	15.4788	18.8991	17.1413	16.2598	16.7466	17.8379	15.5262	16.8045	15.1235	17.0686	14.9742	16.9255	15.8265	15.7318	17.1879	16.3432	15.7421
NCOA7	ENSG00000111912.17	mRNA	17.4329	16.1359	16.4083	16.2566	16.0638	16.0245	15.8991	15.3989	15.4221	15.2422	16.2334	16.1245	15.9465	15.6737	15.9989	15.5603	15.5561	16.105	17.2179	16.4449	15.69	15.8339	16.5704	15.8136	15.5084	15.1119	15.4425	16.576	16.2587	15.7355	14.5226	16.3555	15.9425	15.2986	16.0543	15.6524	15.6749	15.4545	16.4543	16.6109	15.5888	15.4803	15.171	15.6474	15.0456	16.4423	15.242
NDC80	ENSG00000080986.11	mRNA	15.9346	17.9634	16.7353	17.3063	15.2023	16.6842	15.3384	16.8223	16.0719	16.4189	14.4249	17.7373	15.3484	16.2719	16.0705	15.9176	17.2816	16.3519	16.2175	15.7786	17.8771	16.6761	16.6153	16.7455	17.0667	17.0829	16.2762	14.5996	16.3466	15.3875	17.0719	15.1663	18.7329	16.5983	15.1285	16.5247	16.0521	17.6525	15.728	15.3263	16.3056	16.2298	17.1867	16.8867	17.0242	16.4169	16.3483
NDP	ENSG00000124479.8	mRNA	18.1596	17.4081	19.9602	19.5128	19.9413	19.0832	19.4335	20.111	18.5452	19.2393	19.5769	18.5663	19.2221	18.7901	19.0165	19.1753	19.7756	19.1181	18.5826	19.745	18.0823	17.9664	19.6872	19.8536	18.2896	19.4729	20.0703	19.3404	21.2004	21.2035	18.8917	17.9093	19.995	19.5268	19.316	20.0019	18.3118	19.0582	17.5323	17.9335	17.071	17.5393	18.2959	18.7575	19.6462	18.0177	18.7954
NDUFV2	ENSG00000178127.11	mRNA	16.8557	16.7082	16.044	16.4607	17.0088	16.436	16.1411	16.4915	16.3059	16.8143	16.2708	16.2322	15.8206	15.8353	15.4731	15.6793	15.8491	15.9123	17.1041	16.8573	16.9972	16.5878	15.8021	16.6198	16.42	18.2682	16.5155	15.7993	17.5599	17.4103	16.5899	16.6595	17.0485	15.8433	16.1319	16.4679	15.0463	16.2941	15.4346	15.0867	16.6008	16.647	16.5517	16.326	16.1986	15.9964	16.4821
NEBL	ENSG00000078114.17	mRNA	16.004	14.3513	16.3953	15.9026	17.2425	17.0932	16.6431	15.3304	15.9015	15.358	16.9639	15.3238	15.3707	14.6218	15.1384	14.8569	17.8667	15.8167	16.9859	16.0638	16.6641	17.2268	17.5603	16.3498	13.6811	15.4099	16.2537	14.6616	16.9253	17.3032	15.2006	16.6682	17.3566	15.7455	18.0419	15.2753	16.0333	16.3531	12.0739	16.6669	15.3346	17.3343	12.5689	15.9673	17.7553	17.3858	13.1851
NEDD9	ENSG00000111859.15	mRNA	19.7608	16.3984	17.7455	16.4854	15.797	17.2354	16.6927	17.6149	16.1662	17.2219	17.4988	17.1314	17.7979	16.4105	17.033	17.2819	16.5406	16.3536	16.0616	17.798	16.0767	16.5911	16.8608	16.5615	15.9355	16.8035	17.2299	18.2228	17.1958	15.739	16.9296	17.8445	16.2244	17.8178	17.407	17.727	15.862	16.849	16.5376	17.6687	16.7776	16.6856	15.9194	17.4348	17.8501	17.3867	17.7998
NEFL	ENSG00000277586.1	mRNA	19.8489	16.7507	15.9549	18.0857	17.8693	18.2715	13.9313	15.7565	14.1256	16.3429	18.0946	16.1506	17.1947	17.4206	15.6121	13.4425	15.4837	16.7701	22.1068	16.5157	17.2457	12.9773	12.8444	16.4324	11.1349	12.1148	16.4841	11.9318	17.2903	14.4959	15.5825	14.9507	11.6017	13.6765	16.0742	14.8983	17.7584	14.2175	13.6231	12.3898	12.0492	11.1302	15.1885	14.9039	11.5306	19.2587	13.6281
NELL2	ENSG00000184613.9	mRNA	16.5402	14.4349	19.2849	14.3199	16.2124	18.5469	17.9138	16.3005	17.4702	17.295	17.198	18.5274	16.4658	16.7309	17.8668	16.3112	17.9915	15.8971	18.8389	18.3818	16.301	16.5655	19.3662	18.7194	15.2928	14.6471	16.2932	17.2766	16.6822	16.1525	16.2246	17.8316	18.2047	19.02	19.3029	17.1467	18.5386	15.4003	17.2863	17.0603	16.8467	18.128	15.6581	15.3294	16.4981	17.8574	15.1454
NETO2	ENSG00000171208.8	mRNA	16.4839	17.9085	17.9541	17.0968	14.0777	15.8994	16.2096	18.3482	16.3827	16.828	14.867	17.7472	16.5701	17.9038	17.804	18.8444	15.9813	16.7918	16.3045	17.3964	18.0589	17.1281	11.8677	17.762	18.0938	13.2223	17.4044	17.874	16.5969	16.2086	17.4791	15.8306	17.2992	17.0969	17.7033	17.4358	17.7265	13.2034	17.2124	13.963	17.2628	16.1572	17.691	17.8881	13.7675	18.4495	13.4952
NFATC1	ENSG00000131196.16	mRNA	15.7079	15.4863	14.8597	15.4579	15.087	15.823	15.1982	14.6495	15.8507	15.7263	15.8531	13.9785	15.0651	13.7407	14.944	15.5647	15.4796	15.1837	14.2436	14.2747	16.0541	13.4954	15.3343	14.8439	15.8731	15.7539	14.8362	16.013	14.2179	14.8116	14.2033	15.7779	15.1885	14.4859	15.468	14.341	14.8122	16.1793	13.3918	15.1281	15.9945	14.9596	13.3119	15.4037	15.3232	15.1139	15.6803
NFIA	ENSG00000162599.14	mRNA	15.0915	18.1425	19.3846	15.6297	17.1732	18.501	17.3627	15.4013	18.6951	18.187	18.1345	17.7964	16.7753	18.0049	18.4894	19.0358	18.6132	18.1081	16.055	16.5296	17.071	18.4404	18.1512	17.8707	18.2748	17.4318	16.9582	17.5579	17.8784	18.5675	18.2213	16.7409	17.4842	18.5654	17.7984	17.1862	18.9856	18.2062	17.6865	18.1751	18.8086	17.5326	16.2045	18.299	17.0452	17.8329	18.0844
NFIB	ENSG00000147862.13	mRNA	16.5609	18.9061	19.3	17.8363	17.0072	17.8418	17.944	17.0819	18.5453	17.3242	17.378	18.8962	16.9247	17.3859	18.6489	17.7677	17.7837	18.7282	17.2857	16.551	18.3712	18.266	17.3779	19.1045	18.0067	17.4306	18.0264	18.1981	17.8331	18.586	19.0641	17.8324	18.3268	17.2872	17.2863	17.4414	20.0336	18.627	18.6208	18.5723	18.4557	18.8434	19.3465	18.3567	18.4133	18.6776	17.6625
NHLRC3	ENSG00000188811.11	mRNA	16.6743	15.6565	16.0545	17.0169	17.6672	15.752	16.2668	16.3953	16.6911	16.5154	16.7907	16.748	17.019	16.4181	16.7012	16.7122	16.2672	16.6164	16.4201	16.2971	15.8399	16.0891	15.9581	15.7826	15.7353	15.5577	16.1413	16.4003	16.7313	17.1077	15.4886	17.0653	16.5157	16.9246	16.6677	17.1089	16.7827	15.7155	15.8374	16.3999	16.806	15.8586	16.1113	16.2276	16.2398	15.9794	16.1609
NID1	ENSG00000116962.13	mRNA	19.9157	19.2773	18.7177	19.1467	18.0833	18.5327	18.6821	20.897	18.7459	19.0456	17.9693	19.2	19.0355	19.5985	19.3276	19.5799	18.1311	18.5414	17.7808	18.8845	18.1054	19.6996	17.9284	17.6863	18.9325	18.0743	18.1793	18.9823	17.5208	16.9704	18.6525	18.913	18.5134	19.4248	18.1976	18.4145	18.6228	19.1145	17.9158	19.0187	19.2566	17.7997	18.0812	19.6624	17.8014	19.4933	18.6277
NINJ2	ENSG00000171840.10	mRNA	15.8952	14.9499	14.0206	16.3104	16.7655	15.8981	17.4396	15.9681	14.8287	15.0478	16.6695	14.915	14.8781	14.7456	15.6894	14.8232	15.1476	15.5529	17.5386	16.1632	14.2238	12.9051	15.0259	18.1558	14.1073	16.397	14.8421	15.27	16.215	15.741	14.4204	15.316	15.6048	14.8225	17.4863	15.7383	14.6914	14.4646	13.3044	14.7251	13.8855	15.2924	14.9754	14.3938	14.0048	14.7992	15.5938
NINL	ENSG00000101004.13	mRNA	14.4676	13.6543	13.4962	15.685	14.9307	15.0869	12.6781	14.1963	15.4943	13.8841	16.4293	15.9669	14.5811	15.4964	14.0487	15.2445	14.8923	14.5765	15.3833	13.645	16.2723	14.8117	14.8244	13.2156	14.7368	12.3385	13.9269	14.5641	14.0806	11.9815	16.0412	14.8035	14.7621	13.5081	14.9337	14.1014	16.6342	16.0034	15.9539	15.5618	16.0423	15.3484	14.5166	15.1265	13.826	15.4934	15.3594
NIPAL2	ENSG00000104361.8	mRNA	17.2759	13.4246	14.8801	16.0649	16.4649	15.9229	14.9813	14.6199	16.1309	15.021	16.1674	14.8031	16.3056	15.8623	15.4443	15.6013	14.6266	14.1718	16.199	15.3952	14.7544	13.0915	13.9859	13.9953	13.4795	14.1334	14.4833	14.7809	15.9444	14.757	14.2751	16.9715	13.4647	13.6712	14.9295	15.1812	15.0301	13.5849	13.0379	16.0972	14.5946	13.8769	13.3259	15.0823	15.2306	15.9517	14.5486
NKAIN2	ENSG00000188580.12	mRNA	14.4008	11.3882	13.3535	13.0974	15.3005	15.7012	16.0386	13.7105	12.3941	13.7192	16.6549	13.8782	13.3885	13.597	15.2242	11.2532	13.9311	15.0257	17.5102	12.7842	12.0921	12.316	14.1397	17.2392	10.8627	12.7246	13.0775	12.058	14.8794	11.3496	11.111	14.6619	15.6392	11.4875	17.5583	14.1945	15.6401	12.4188	10.7483	14.9746	11.8519	14.8761	12.5077	12.0528	11.8956	15.5218	11.3822
NKAPL	ENSG00000189134.3	mRNA	12.4619	14.7914	12.1818	13.1104	14.0956	13.92	13.3522	13.3183	12.5884	12.2506	14.0144	11.8711	12.5235	12.4822	12.4311	10.4638	13.6271	13.0342	14.7084	12.2798	15.1703	14.7003	12.746	12.2983	11.0508	13.3583	11.6944	12.226	13.3411	13.0899	12.0737	12.2953	12.0852	14.5024	12.8946	14.0901	12.4687	11.6571	9.16869	12.5686	11.1777	12.8066	11.7862	14.1302	9.76303	13.0585	11.5234
NKX2-1	ENSG00000136352.16	mRNA	11.1503	14.2379	10.3157	8.21152	0	10.2712	8.78146	7.13121	9.83302	8.88889	8.11596	7.23051	10.7516	7.15043	6.90856	9.2527	14.5645	12.3786	11.6688	8.16522	10.5214	0	17.4413	15.0661	7.78532	8.71176	7.05505	0	11.8356	7.82479	9.31888	0	10.2887	6.92102	12.6233	9.77972	9.52104	10.8236	11.5392	13.6362	7.64994	12.8882	9.73856	8.1857	8.81519	0	8.11927
NMRAL1	ENSG00000153406.12	mRNA	17.835	17.1348	18.0195	17.8472	18.4457	17.6434	18.6801	18.1351	18.4476	18.2097	17.9247	17.6846	17.7923	17.8293	17.0677	17.656	18.9517	17.5144	18.041	18.0784	18.8572	15.6175	18.6671	18.553	17.6816	19.2355	18.2605	17.6547	18.5173	17.7505	18.3847	16.9836	18.3582	17.9158	18.0247	17.9193	18.4472	18.7857	16.8558	17.9157	18.1274	19.0107	18.2833	18.1129	18.3005	17.2889	17.1295
NMT1	ENSG00000136448.10	mRNA	18.2832	18.6693	18.6679	18.2658	18.7323	18.9116	18.5557	18.6875	18.5359	18.3946	18.2538	18.1293	18.6047	18.5321	18.629	18.323	19.1587	18.5963	18.6169	18.6999	18.8156	18.5602	19.6718	18.3445	18.5455	18.7633	18.8282	18.9877	18.7186	18.7641	18.5554	18.9533	18.6257	18.3527	18.8056	18.3567	18.7334	18.7548	19.1813	19.2242	19.0325	19.1148	18.6127	18.4748	18.6836	18.6316	18.7373
NOG	ENSG00000183691.4	mRNA	14.6545	15.0912	14.6012	13.3066	13.9113	15.0568	14.145	13.0728	15.7832	15.3006	14.8975	14.8336	14.4931	11.8829	11.5462	14.329	15.3431	16.1811	14.9226	13.362	16.0404	16.5772	13.7894	16.4886	11.5215	12.1514	13.6692	13.4882	14.9495	14.2046	12.966	14.3681	12.1676	14.2364	14.8249	12.8007	14.9053	13.6976	14.7793	13.697	14.292	15.4852	13.8217	13.7045	12.7769	14.1901	12.7635
NOL4	ENSG00000101746.14	mRNA	12.4513	16.5762	16.8334	13.5997	14.2601	14.3789	14.7358	12.685	15.1153	14.564	15.465	15.9957	13.7048	14.8985	15.6694	14.8479	14.5389	16.2377	16.4068	14.877	16.2535	16.4807	16.1181	17.1077	15.0366	14.9922	14.8992	14.0524	14.8331	13.7932	15.4225	13.0505	13.8617	15.9138	14.7163	14.6837	15.6979	13.6168	14.8143	15.5636	15.2526	15.8434	15.2911	14.1682	13.9439	16.2108	11.0766
NOXA1	ENSG00000188747.7	mRNA	16.2003	15.2374	16.23	15.7071	17.1396	16.0184	17.951	14.4287	18.5756	17.871	17.221	15.0671	17.4108	16.7032	16.4156	17.4213	17.7107	15.8788	16.3168	15.6606	14.2136	14.2704	15.3458	16.0313	16.4821	14.578	15.6391	15.374	16.8231	15.6997	17.4415	14.9616	17.1549	17.0485	17.1034	16.1991	16.798	17.6996	15.3991	16.7421	17.0339	14.7408	15.8506	15.3057	16.114	16.3799	14.7438
NPAS2	ENSG00000170485.15	mRNA	16.4116	14.5422	15.8444	16.3062	15.4539	14.882	16.836	16.6476	14.7376	14.0517	15.3602	15.0233	16.5854	15.4508	15.5813	15.569	13.477	14.7991	14.9044	16.4891	15.4941	13.1265	15.1831	14.0076	15.8357	13.8467	12.9217	17.0851	14.662	13.8823	14.9248	16.5392	13.892	16.5363	16.359	15.5254	13.962	14.1105	13.3396	14.974	13.679	13.3642	14.7038	15.4481	15.8648	16.6154	13.665
NPAS3	ENSG00000151322.17	mRNA	14.6638	16.6406	18.2835	14.3509	16.2276	17.6871	17.037	15.5336	17.3911	17.8415	17.812	17.5876	17.8689	17.8181	18.399	17.8787	17.5943	17.5471	15.7252	16.8438	16.845	17.2925	17.2211	16.7517	19.0385	16.3337	17.8459	17.63	17.521	16.6135	17.669	15.5277	15.9076	18.7628	18.4182	17.1227	18.7273	18.0813	16.8047	17.1413	17.7244	16.6588	17.6434	17.704	16.7587	17.0084	18.2273
NPFFR2	ENSG00000056291.16	mRNA	13.0519	7.44139	8.57242	0	9.18035	0	0	12.4994	0	7.73171	8.53867	0	0	7.57187	7.32953	0	0	0	11.4255	0	8.14224	0	0	0	0	0	0	0	0	0	0	0	7.39819	7.34201	8.46626	7.40331	0	0	7.64804	8.65429	9.65353	7.76414	0	8.60847	0	0	0
NPNT	ENSG00000168743.11	mRNA	15.7137	13.7728	19.2746	15.4459	17.3229	17.2939	19.243	16.9385	17.9784	15.8301	18.7961	16.1468	15.0067	19.9034	19.2293	15.4576	18.7017	14.8664	14.9825	17.2131	14.5504	16.5615	17.7306	15.2713	15.6291	16.557	16.4434	17.427	18.3689	14.1898	19.4396	18.0745	18.4273	19.6052	18.4049	18.8544	17.9042	17.9919	16.0311	14.0243	18.464	15.5402	16.121	18.1995	17.8893	17.8818	17.6678
NPR1	ENSG00000169418.9	mRNA	13.0913	15.3929	13.3043	13.4887	13.7938	14.3909	16.7409	13.4828	13.7659	13.7799	13.0942	15.3052	14.4342	14.2999	13.6539	14.9579	13.255	15.2281	13.9877	14.4185	13.462	14.3533	11.2327	14.1775	13.6881	12.0481	13.5232	14.5003	12.9203	11.8586	14.9507	13.8085	14.0262	16.9031	14.1191	12.2412	12.5026	13.9456	15.8254	14.9281	14.0266	13.2877	15.9484	15.6926	12.5209	15.9193	14.663
NPR3	ENSG00000113389.14	mRNA	14.6851	12.991	10.7146	10.9934	10.3371	11.6303	8.55679	11.8733	10.067	10.8313	9.99547	14.8661	10.9344	10.0863	9.9016	10.6813	10.2175	15.1889	12.5214	10.8426	13.171	12.467	9.54804	14.2981	10.1398	11.4948	9.31306	12.6223	11.1956	9.18064	9.76548	11.184	11.4957	10.1769	11.2058	11.1385	10.8796	10.7308	12.397	12.8345	11.0476	12.4616	12.2782	10.8632	10.5877	12.6482	8.06417
NPTX1	ENSG00000171246.5	mRNA	16.868	15.4982	15.1468	13.5754	14.6973	18.0361	13.8656	15.5891	13.0095	16.4019	16.4565	17.5376	16.3793	17.014	16.4442	15.1835	15.765	16.0422	18.8346	16.1939	13.8498	15.9844	11.8335	15.5458	13.4907	11.9115	18.7749	18.3147	15.7579	13.6667	14.6561	12.8309	11.8606	16.7076	15.4434	17.4278	18.8245	13.7472	14.9734	14.813	16.8944	12.2284	17.6822	16.6981	11.052	17.9438	14.6314
NPY1R	ENSG00000164128.5	mRNA	12.3676	11.0008	11.4987	9.12985	16.1812	13.1909	12.6501	12.9677	11.0158	10.9003	13.1526	14.5201	11.6495	14.2228	12.3284	9.52906	12.6147	14.0239	14.8114	11.7593	16.5334	12.7059	10.6255	13.1051	10.3785	10.6299	11.1029	12.9027	11.5949	10.4182	0	10.5973	11.2088	10.4157	12.807	11.7398	13.3011	9.89246	16.6468	12.607	9.56528	13.4241	10.3367	12.6377	11.9136	12.1123	11.3572
NQO2	ENSG00000124588.18	mRNA	15.6929	15.2319	15.9988	15.6521	16.3798	16.2595	15.6767	16.3278	16.2052	16.2356	16.2344	15.1238	16.0804	15.8864	15.38	16.0371	16.2498	14.9466	16.3964	16.3804	16.5257	15.4816	16.7559	15.5902	16.1184	17.0715	16.1181	15.7227	17.069	16.6528	16.5526	16.7918	15.3766	15.792	15.5468	16.0439	14.7573	16.2137	15.8757	16.1606	16.5815	16.3414	15.1655	15.9695	16.3898	15.7703	15.7933
NR1D1	ENSG00000126368.5	mRNA	17.668	17.0951	18.0578	17.9156	17.7243	17.4837	19.0056	18.1058	17.0708	16.4865	18.1062	17.8654	17.7092	17.7991	16.6385	17.1407	17.7584	16.5433	17.7504	17.2311	15.9919	16.7329	19.5399	17.2721	16.8889	17.8711	17.046	18.1766	18.0172	16.877	16.6138	18.9816	19.1008	18.8586	18.9709	17.2561	17.2991	18.001	18.5367	16.6894	19.8971	17.4271	17.1432	19.0789	18.3357	18.2714	16.9201
NR1D2	ENSG00000174738.11	mRNA	17.0736	17.4993	16.8252	17.5096	17.641	16.5712	17.6079	16.9734	16.6215	16.7807	17.8545	16.7892	16.9197	18.0395	16.7867	18.0967	17.3295	17.0346	17.2973	17.2565	16.1562	17.5066	17.0889	15.9369	17.1094	16.094	16.601	17.1473	17.5901	16.9564	16.2355	17.0093	17.6876	16.6723	17.2718	17.2768	17.6113	16.4615	17.5048	16.7804	17.8868	16.6931	16.9056	17.8808	16.9565	17.5301	17.8728
NR1H2	ENSG00000131408.12	mRNA	18.7852	18.655	18.9459	18.3734	18.2556	19.0029	19.2241	18.8505	19.2219	19.0023	17.9832	18.0478	18.3848	18.1488	18.0224	18.4586	18.6829	18.3553	18.4112	18.8231	18.5027	17.7066	18.9532	18.745	19.1033	19.4734	18.8095	19.1751	18.4043	18.5513	18.5506	18.7513	18.9623	18.5266	18.6487	18.2192	18.3642	19.1406	19.3764	18.4269	18.5892	18.2694	18.18	18.3753	19.106	18.394	18.3795
NR1H3	ENSG00000025434.17	mRNA	16.5739	16.5201	16.6334	17.9268	17.7953	16.8656	17.0281	16.7937	17.1928	16.6437	16.5655	16.4905	16.5391	16.566	16.6155	16.265	17.482	15.8625	16.3581	16.7828	16.5123	15.3436	16.8147	16.3467	16.348	17.634	16.9751	16.4839	17.3614	16.784	16.647	15.8749	16.2155	16.3638	16.5283	17.5199	15.5656	16.9985	15.5251	16.1431	16.6303	16.1968	16.2816	15.9844	16.0531	15.9667	16.7481
NR2C2	ENSG00000177463.14	mRNA	16.0914	16.2119	16.6865	16.5517	16.2365	16.0764	16.089	15.9409	16.2281	16.3721	16.6164	17.0116	16.5156	16.7549	17.1735	17.2856	16.7825	17.2594	16.4987	16.0174	16.1718	17.0084	15.8456	16.0452	16.5979	15.0811	16.1963	16.7781	15.8829	15.8946	16.0933	16.2297	16.0744	16.7554	16.7136	16.6267	17.3662	16.4951	16.6478	16.8744	17.0271	16.1756	16.4143	16.444	16.7885	17.0038	16.5506
NR3C2	ENSG00000151623.13	mRNA	13.4506	12.7156	15.2825	13.6607	14.5707	15.2417	16.0034	13.5591	15.6318	13.9465	16.2536	15.8209	14.8372	15.8047	15.7128	14.7524	16.2143	13.4525	15.1532	15.6298	11.6518	13.8526	15.5151	14.9174	15.8385	14.5108	13.2399	14.5198	14.8906	14.5116	13.7062	14.5746	15.8478	16.323	15.4068	14.3602	15.9478	15.5241	14.062	14.3597	16.4682	14.4215	14.0527	14.9894	14.8448	15.7862	15.6278
NR4A1	ENSG00000123358.18	mRNA	19.8526	16.1977	19.2985	15.6074	14.0935	16.0138	15.4439	14.1594	15.6491	16.8079	14.7102	16.2748	15.5804	15.1953	14.8891	15.2917	15.1942	15.8008	16.5081	17.0874	17.315	15.1784	16.6755	17.6334	15.3156	16.1707	15.6371	15.3908	15.2226	14.2062	15.6685	16.0666	15.8876	17.2898	16.4334	15.4906	16.3742	15.9729	16.8219	18.7311	15.6524	14.3576	14.6227	16.8792	15.0668	16.3761	15.0258
NR4A3	ENSG00000119508.16	mRNA	18.0858	13.4307	17.4115	14.216	13.1034	13.5592	13.8835	13.4734	14.1986	13.4645	13.8287	15.3094	15.2877	14.7439	14.6179	15.0249	13.8114	13.8277	13.4408	15.2055	15.1721	14.2806	14.0243	13.8614	13.9118	13.9975	14.2911	15.2484	14.5524	14.9668	13.788	14.0811	15.2053	14.3599	13.4513	14.4703	13.8021	13.9902	15.1863	15.6076	13.2465	14.5021	14.1621	14.4276	14.0887	14.7256	12.9253
NR6A1	ENSG00000148200.15	mRNA	13.1493	14.4085	14.6501	13.2937	12.0648	12.6848	12.5621	10.9054	14.6383	14.4297	13.3413	14.6688	13.2637	13.9006	13.1356	14.9771	13.1457	13.8118	13.3281	11.634	12.9691	13.1066	11.7226	13.3108	12.696	10.5388	12.8626	13.1737	12.6219	11.2924	13.1005	12.6718	12.5233	13.1817	14.0175	13.8502	13.2795	13.2918	13.9533	14.0336	14.3671	12.9705	13.6899	12.4028	12.1654	13.5446	13.0206
NRF1	ENSG00000106459.13	mRNA	16.7546	17.3351	17.0385	16.8634	16.886	16.6158	16.9183	16.7831	17.853	17.4952	16.8121	17.2981	16.8605	17.0319	17.2405	17.1628	17.0063	17.221	16.5743	16.636	17.0825	16.9727	16.6237	17.1194	17.4162	16.1367	16.8836	16.6856	16.6625	16.8243	17.2832	16.6073	16.849	16.9447	16.8259	17.116	17.2705	17.1292	16.9168	17.5169	17.3186	16.6843	17.2693	18.1806	16.7013	16.9154	17.296
NRG4	ENSG00000169752.15	mRNA	11.2592	9.6641	10.5644	12.5155	11.3081	10.9241	11.0488	0	12.411	11.918	11.966	10.8749	12.2646	10.1733	10.9835	11.5822	11.491	10.4628	12.3326	8.81668	9.04719	10.0247	9.5936	10.7878	10.1114	8.04515	9.83653	8.91024	11.0798	10.9579	12.3487	10.7773	9.10692	12.0736	10.9552	10.1107	11.173	10.978	9.13568	10.4659	11.2226	11.8747	9.72201	10.7609	11.2594	10.6756	9.4475
NRP2	ENSG00000118257.15	mRNA	18.3443	17.0629	16.6518	18.1544	18.7714	16.935	17.9741	19.9104	16.7573	17.6971	17.7869	16.629	19.0445	17.6095	17.3336	16.7136	16.2242	17.0247	16.0558	17.5794	17.5585	18.5528	16.2944	16.1756	15.2199	16.4202	16.4853	18.6145	16.5456	17.4946	16.5447	19.0182	15.7426	16.8468	17.5481	17.768	18.2364	17.4384	18.0311	17.7877	18.4136	18.5112	16.2422	17.8226	18.1931	17.942	16.3656
NRTN	ENSG00000171119.2	mRNA	12.4405	15.0456	11.658	11.3051	11.2674	11.7834	12.1659	10.6347	9.76108	8.81702	10.2099	10.3199	0	10.6541	0	10.0277	10.049	10.966	9.4285	10.674	14.3136	10.6208	11.9112	10.747	10.2929	10.2225	9.55902	10.0901	11.2613	0	10.4156	13.8587	9.48055	10.7448	9.55301	10.07	11.6174	10.6362	10.3158	8.74299	9.15821	0	11.0281	11.6941	10.3261	11.3423	0
NT5DC3	ENSG00000111696.10	mRNA	15.7883	15.4277	16.1988	15.9658	17.9259	15.9925	14.1015	15.8259	15.3115	14.9019	14.5522	15.3969	15.7888	14.1455	15.3692	14.6234	15.9528	15.7381	15.5358	16.5518	15.6978	15.8972	15.7912	16.0546	16.0116	15.1285	14.2075	14.9432	14.8284	15.9835	15.9976	17.6603	16.6611	16.0659	16.1941	16.3702	16.2232	15.8959	16.6301	17.7257	15.6901	16.3077	13.6471	14.9828	17.1633	16.3436	15.5358
NT5M	ENSG00000205309.12	mRNA	15.5487	17.3931	16.5868	15.6917	17.1074	17.59	17.2192	15.9096	16.7795	17.5556	16.2812	15.8063	16.5058	16.6732	16.1302	15.7012	17.9679	15.5558	17.2871	15.7933	17.3166	15.7976	17.8567	17.3247	16.8488	17.9933	17.1631	15.1973	17.4099	17.0559	17.7705	16.9224	17.7142	17.1562	16.6357	15.8902	16.8536	17.6662	15.2912	16.3436	16.907	17.337	17.1651	16.6061	17.0392	16.0915	17.0263
NTRK3	ENSG00000140538.15	mRNA	13.6999	15.7917	16.0203	11.8959	15.4953	16.832	15.7726	12.8842	16.251	16.6442	16.4654	16.6133	16.7677	15.9414	16.4274	16.703	14.3062	16.8217	15.6742	15.1061	14.5104	15.0501	16.0351	15.2254	15.7391	14.5118	16.331	15.357	15.2154	15.9185	16.7731	13.5884	15.45	17.3685	16.1295	15.5372	15.8969	15.1099	15.3329	15.2135	16.2631	14.0503	16.6207	16.2956	14.1771	16.9132	17.1593
NUDT18	ENSG00000275074.1	mRNA	16.6393	16.2209	14.5024	16.314	16.9377	16.3868	16.4525	16.7357	16.4714	15.9963	17.0132	14.9657	16.3961	14.8231	15.4538	15.246	17.4966	15.5654	17.0255	17.1573	17.9976	15.9569	16.7599	17.1239	14.9506	16.173	15.4715	15.4031	16.701	16.729	15.4145	16.3482	16.5704	15.8883	15.721	16.5452	15.5188	16.6517	15.7392	15.6765	15.0777	16.8308	16.0131	15.9965	16.1802	15.2112	14.8344
NUF2	ENSG00000143228.11	mRNA	16.1163	18.1603	16.799	16.5604	15.1316	16.5667	15.156	16.7769	15.6311	17.1982	14.4074	17.8794	15.5632	16.3385	15.9668	15.8664	16.9553	16.4464	16.5526	15.2728	17.9603	17.7748	17.1597	16.5863	16.2152	18.0295	16.5212	13.6588	17.9837	16.0845	16.5893	14.2456	17.2686	16.2896	14.5804	17.4676	17.0625	17.2361	16.69	16.2323	16.2971	16.1442	17.362	16.7321	16.9963	16.3543	16.7735
NUP62CL	ENSG00000198088.9	mRNA	11.8047	0	12.1543	11.1387	12.6855	14.4239	11.7625	9.46937	12.1782	9.64912	12.3319	10.3054	12.567	8.90474	11.1181	11.3909	12.1038	10.2151	12.7196	11.6226	12.2822	11.8688	16.3653	9.41183	9.54218	10.0561	12.6132	11.6597	12.8314	12.9724	8.08343	14.3222	14.8356	13.2253	12.5003	12.9023	14.3822	9.4708	8.98114	10.5741	10.9899	14.1611	10.0143	7.94808	0	9.37006	0
NUPR1	ENSG00000176046.8	mRNA	18.0228	17.6196	16.9107	17.6389	19.1531	16.9238	17.8574	17.5344	18.7575	17.9435	17.0426	17.6525	16.7733	16.3177	16.7285	17.8099	17.9007	16.9094	17.2953	18.3113	16.2175	15.8423	18.9262	17.1789	17.004	18.196	16.4629	18.6022	18.7966	19.3398	15.4773	18.6876	18.0019	15.3196	18.3438	18.0809	16.1728	18.7291	18.9383	17.7344	16.1315	18.0791	16.1084	17.0459	17.696	17.0419	15.6251
NYAP2	ENSG00000144460.11	mRNA	9.32033	9.40195	11.7837	8.18734	6.57486	8.66441	7.59149	6.52739	0	6.70555	8.50551	9.93506	8.76637	9.3406	8.29189	7.32819	8.34491	11.0455	12.6968	8.87597	9.69059	0	10.031	11.4989	8.17454	0	7.44325	0	8.72691	0	0	6.94083	8.36076	7.8909	7.43727	8.94939	10.9106	9.51507	9.41704	8.94232	0	9.0489	0	0	0	11.5002	0
OAS1	ENSG00000089127.11	mRNA	16.8414	15.6799	18.8501	18.9535	16.9518	17.637	17.2802	16.3438	16.7146	15.631	17.4699	16.9396	16.2825	19.0839	15.6207	17.314	19.0166	15.8103	16.2493	18.8599	16.0772	15.0774	18.8352	16.07	21.3571	17.8826	17.4319	17.6484	19.3926	17.7869	17.0742	16.8083	19.4533	15.6973	15.3422	17.4178	14.695	17.922	15.5583	17.1108	18.4599	17.2215	16.3323	16.6358	15.8067	17.414	20.284
OBSCN	ENSG00000154358.18	mRNA	12.6102	11.2882	12.3255	12.8673	11.7669	11.3122	9.95243	11.6035	11.3557	11.9278	12.0083	12.4057	11.4749	10.0762	10.8133	11.6388	12.1804	11.7343	12.0905	10.5246	11.9401	10.664	11.4524	11.2169	10.8382	9.11504	9.47678	11.3446	10.0988	10.7353	10.9666	12.3222	10.3841	11.1514	10.619	10.5036	12.1984	11.6546	12.4285	12.545	11.3149	11.5756	9.46344	11.2652	10.2868	12.3679	10.5192
OCIAD1	ENSG00000109180.13	mRNA	19.5233	19.6568	19.1261	19.2385	19.7386	19.2011	19.6675	19.3191	19.5202	19.5888	19.7953	19.307	19.7607	19.7933	19.4525	19.6471	19.3191	19.2624	20.2355	19.9412	19.3618	20.146	19.5495	19.4539	19.2481	19.8916	19.5982	19.3993	20.7082	19.9181	19.3914	19.374	18.9654	19.1708	19.7308	19.7349	19.5879	19.4323	19.7797	19.4813	19.832	19.3931	19.6172	19.7787	19.2711	19.327	19.6083
ODF3B	ENSG00000177989.12	mRNA	17.5387	15.0082	15.1895	17.7777	16.7321	16.052	15.3879	14.8193	17.1801	15.3902	15.4411	14.9288	15.4703	15.2867	14.1247	16.0214	16.1511	15.1061	14.5633	15.9376	13.4211	12.3745	15.538	14.5176	17.7425	14.8265	14.9636	15.5672	15.5565	15.6093	14.6221	15.6349	15.9569	13.939	14.99	16.4165	13.4166	16.5823	13.2618	15.9251	13.3123	16.3595	13.171	12.5951	13.857	14.1253	14.8029
OGDHL	ENSG00000197444.8	mRNA	15.0033	11.3642	13.8898	14.6233	17.0128	16.3636	17.7678	15.3187	12.7669	14.1044	16.9599	13.1864	15.8555	15.3992	13.5496	12.4662	13.6028	13.6681	17.0955	15.4373	15.1483	12.7118	14.1171	14.7477	10.8316	13.648	14.6812	14.061	15.1409	13.9062	12.5064	13.8333	16.8233	16.6326	16.2494	13.9362	14.5388	12.3763	16.0397	12.2301	16.9554	14.7595	15.1963	15.1236	16.1052	15.6158	12.5814
OLFM1	ENSG00000130558.17	mRNA	17.3188	18.867	18.4099	15.3111	17.2634	19.9113	16.919	13.8139	16.885	18.1402	18.9217	20.1252	18.6218	18.0135	17.731	17.1582	17.8764	18.2825	20.6832	17.3302	17.9716	16.3988	19.4815	20.0994	14.7625	14.0635	20.0088	16.3571	18.4982	17.829	17.0087	18.0623	18.0628	19.2488	18.7609	17.3923	19.287	18.3614	16.8194	17.4136	15.4915	17.4569	18.4392	18.5803	17.6639	20.2926	18.4041
OLFML1	ENSG00000183801.6	mRNA	13.9518	14.8213	14.1961	13.4633	14.7986	14.6752	14.0635	14.0248	16.0498	14.3523	13.8992	14.045	14.7961	15.1967	14.4505	15.7406	14.3548	14.6119	14.0618	16.4297	13.724	14.5121	12.9698	13.6591	14.0179	13.5206	13.7586	13.566	14.4107	13.8497	13.8564	15.2777	16.516	14.368	13.6746	14.2869	12.6487	15.0095	13.8263	14.6705	16.5659	14.0854	13.4835	16.2814	12.8091	15.3988	14.4713
OLR1	ENSG00000173391.7	mRNA	18.707	16.9928	18.1008	19.8166	19.3936	18.4103	19.439	18.1927	17.4142	16.4384	19.4144	17.6108	18.2181	18.4884	19.9494	17.0726	18.4791	18.3143	18.0168	19.1565	14.6821	15.912	17.5669	17.433	18.0407	17.8258	17.4049	18.2544	17.7152	19.1499	15.711	18.1808	19.1275	16.9336	17.929	18.4617	16.9061	17.0972	15.4567	18.3682	16.532	17.3892	16.9497	16.1821	16.9407	17.4058	17.5936
ONECUT3	ENSG00000205922.4	mRNA	7.54102	10.4234	5.77712	7.4061	8.58595	7.88216	7.39276	7.73365	8.44156	9.07944	0	8.41604	5.68464	6.75959	8.09272	7.12967	8.36739	8.32589	7.52727	7.35993	7.32807	9.71466	5.575	7.26362	8.71011	8.63983	7.24463	8.50774	6.37126	7.43275	9.09516	7.15439	6.58664	7.11047	7.6513	8.16669	7.13534	7.32229	7.82912	8.42182	6.26756	6.95114	8.12562	5.81261	7.42636	11.0204	8.04743
OPHN1	ENSG00000079482.12	mRNA	14.916	16.669	15.4036	15.1756	15.228	16.0166	16.275	15.917	16.1508	15.8166	17.3172	15.6903	15.9325	16.5316	16.1922	17.4595	16.5065	17.8994	15.7707	15.5932	16.3578	17.9618	17.4477	16.6215	16.902	15.9655	15.6237	16.852	16.5401	15.8071	15.301	14.768	16.1569	15.8099	15.6829	17.0556	16.8688	15.5146	17.6024	17.2039	17.0041	16.309	15.2296	16.0415	16.9953	17.0706	16.023
OR2B3	ENSG00000204703.4	mRNA	0	0	0	0	0	0	0	0	0	0	0	0	8.70595	0	0	0	0	0	0	0	0	0	0	0	9.43299	0	0	0	0	9.47258	0	0	0	0	0	8.62652	8.59	0	0	0	0	0	0	0	0	0	0
OR5AR1	ENSG00000172459.3	mRNA	0	0	0	0	0	0	0	0	0	0	0	0	0	0	0	0	0	0	0	0	0	0	0	0	0	0	0	0	0	0	0	0	0	0	0	0	0	0	0	0	0	0	0	0	0	0	0
OR6K2	ENSG00000196171.3	mRNA	0	0	0	0	0	0	0	0	0	0	0	0	0	0	0	0	0	0	0	0	0	0	0	0	0	0	0	0	0	0	0	0	0	0	0	0	0	0	0	0	0	0	0	0	0	0	0
OR6N2	ENSG00000188340.1	mRNA	0	0	0	0	0	0	0	0	0	0	0	0	0	0	0	0	0	0	0	0	0	0	0	0	0	0	0	0	0	0	0	0	0	0	0	0	0	0	0	0	0	0	0	0	0	0	0
OR7G1	ENSG00000161807.3	mRNA	0	0	0	0	0	0	0	0	0	0	0	0	0	0	0	0	0	0	0	0	0	0	0	0	0	0	0	0	0	0	0	0	0	0	0	8.73175	0	0	0	0	0	9.09373	0	0	0	0	0
OR8K3	ENSG00000181689.1	mRNA	0	0	0	0	0	0	0	0	0	0	0	0	0	0	0	0	0	0	0	0	0	0	0	0	0	0	0	0	0	0	0	0	0	0	0	0	0	0	0	0	0	0	0	0	0	0	0
OSBP2	ENSG00000184792.14	mRNA	15.7482	15.551	14.6811	15.6206	15.37	15.5101	17.3538	16.8431	15.3219	15.0199	15.5406	14.9236	15.3947	17.4268	15.9528	16.04	14.5008	15.894	16.0089	16.592	16.5123	14.4001	14.3363	16.0541	15.8466	15.1262	16.5462	14.7324	14.9326	14.5757	14.8858	15.6288	16.098	16.9743	15.2042	17.0334	14.5317	15.18	16.5088	15.6164	15.4032	14.8663	15.2654	16.0266	15.6086	17.302	16.7412
OSBPL1A	ENSG00000141447.15	mRNA	16.8515	16.5415	17.9025	16.9897	17.7549	17.3939	17.541	16.6254	17.0113	17.119	18.4043	16.929	16.3828	17.4251	17.6302	17.2767	17.3481	17.2512	18.2027	16.7291	15.3285	17.4037	17.9701	17.9299	17.6944	17.8347	17.4656	16.7567	17.5627	17.9468	16.9812	17.1471	18.5468	17.8182	18.2278	16.6276	17.1665	17.0112	16.4572	17.3536	17.5754	17.0672	16.5955	17.486	17.4098	17.4524	17.663
OSBPL5	ENSG00000021762.18	mRNA	17.8978	15.5039	16.0019	17.282	16.0393	16.322	15.5231	17.2069	16.6531	16.1908	16.3575	16.7731	16.5092	15.9896	16.6335	16.5081	16.1493	15.8696	16.1841	15.8365	16.4131	15.3118	16.6618	16.9856	15.6955	16.1532	16.635	17.0859	15.5891	14.9423	16.7024	16.5611	16.9161	17.197	16.5432	16.0836	15.4872	16.7012	15.6135	16.519	16.1172	16.668	16.8032	16.6748	16.5007	17.0401	16.4553
OTOGL	ENSG00000165899.9	mRNA	12.2047	10.2493	10.1335	9.71051	11.4925	11.1879	9.25027	10.3611	11.7729	10.8038	12.0814	13.2	11.3466	13.102	10.5371	11.0479	10.6333	11.9928	12.2904	11.0415	14.8437	11.7027	10.9607	11.5659	13.1424	9.47552	10.1002	9.49506	10.5919	9.58547	9.82036	10.9416	10.1471	12.6131	11.8432	10.9243	10.4373	11.21	12.3822	12.1442	12.5236	12.9289	10.2264	10.2366	10.3469	13.6612	10.3543
OTUD1	ENSG00000165312.6	mRNA	17.2237	17.4797	15.4294	17.2383	16.8159	16.4674	16.8899	16.0413	15.4701	15.8328	16.9297	16.0823	16.0998	15.415	15.9779	15.7491	16.5831	16.5622	16.576	17.2658	16.2492	16.2829	16.6758	15.8025	15.7834	15.8734	15.5761	16.8098	16.3929	16.6356	14.9811	16.6979	16.4352	15.7771	16.6398	16.9663	15.9509	15.7674	15.5214	17.5423	14.7526	16.273	15.3294	16.2477	16.1539	15.643	15.1488
OTUD6A	ENSG00000189401.2	mRNA	8.2531	0	0	0	0	0	0	0	0	0	0	0	0	0	7.80898	7.84074	0	0	0	0	0	0	0	0	0	0	0	0	0	0	0	0	0	0	0	0	7.84643	0	8.128	0	0	0	0	8.09207	0	7.93339	0
OTUD7A	ENSG00000169918.8	mRNA	11.8077	11.9074	14.0612	11.5828	12.4332	13.8192	12.86	11.1325	13.2723	13.3936	13.6802	13.202	13.2423	13.2236	13.3102	13.9832	14.0724	13.9088	14.4862	12.5665	11.994	13.9835	14.0358	14.6368	12.5427	12.4839	12.1324	12.9364	12.9089	11.8298	13.3571	10.9147	15.1432	14.2944	15.2538	11.5066	14.0033	13.0626	12.2477	12.6405	13.8606	12.4947	13.5256	13.1365	12.1674	13.9088	12.459
OVGP1	ENSG00000085465.12	mRNA	14.1681	13.3113	15.4966	13.2368	15.2912	12.8943	14.8263	10.5939	16.1925	16.5803	13.5423	15.3622	13.9224	15.0046	13.5738	15.7658	14.5093	15.477	14.238	13.571	14.8482	15.2165	13.5075	13.6509	13.666	12.403	11.9316	14.3043	15.116	14.1206	14.3603	12.7475	12.7915	14.0315	16.0476	14.1309	15.0943	14.6437	14.6788	15.7956	15.3199	13.7232	13.6747	14.7117	14.3236	15.5524	12.8758
OXTR	ENSG00000180914.9	mRNA	17.0565	13.7731	16.1735	12.4226	17.4074	16.297	18.3253	18.596	14.9389	13.609	13.2991	18.1117	16.1928	15.959	18.2361	14.4715	14.8512	14.501	14.9712	17.5809	14.6522	16.5314	18.8583	14.5624	14.974	17.7669	16.546	17.5087	16.1544	13.8455	15.7143	16.6518	17.7108	18.0339	19.0612	16.7703	15.4219	16.3516	15.5626	15.0364	17.9571	13.9194	15.755	18.4066	16.3351	17.4979	17.1878
P2RX3	ENSG00000109991.7	mRNA	8.62194	11.4554	11.328	8.48662	0	9.54794	0	0	8.52634	11.5773	8.391	9.82035	9.32854	11.0019	9.49637	14.2378	11.2262	11.9303	8.77766	9.02387	7.99471	0	11.215	10.5101	9.05742	7.98995	8.90807	9.43887	9.02648	10.4173	8.5963	9.4013	10.7018	11.1856	8.31861	7.25614	9.79664	10.3993	11.3007	9.82614	9.50564	11.0695	8.79368	9.04438	9.82648	10.8831	9.71366
P2RX5	ENSG00000083454.20	mRNA	11.2601	14.4747	10.9105	11.9315	12.9342	11.8657	11.1111	12.0019	12.7727	11.5405	11.407	10.4022	15.377	10.9062	9.81528	12.5012	11.1306	12.2179	13.7183	10.9261	10.8941	10.2883	9.70536	13.8583	10.6968	9.62732	10.341	11.4196	11.2505	10.5845	11.3048	12.2631	11.9188	13.5157	11.0935	11.0902	12.1735	11.473	12.6949	11.8667	9.82455	10.5147	9.69643	13.5443	10.2829	12.2317	11.4647
P2RY6	ENSG00000171631.13	mRNA	15.9111	11.9282	13.7463	16.179	14.7587	16.2448	14.1951	15.1669	14.5828	13.1217	15.1995	12.6469	14.7325	13.9302	14.7019	14.0506	14.9152	14.3713	14.2498	15.6984	14.1255	12.2376	12.9671	12.0743	14.6881	12.1344	14.9391	16.8633	13.2262	14.8644	13.6458	16.713	15.0711	13.5574	12.5672	15.1652	12.1289	14.1683	12.954	13.027	12.5993	14.8053	13.2005	12.2442	15.2467	13.4339	14.4574
PABPC1L	ENSG00000101104.11	mRNA	16.7813	15.0405	17.4888	18.3027	17.7928	15.5457	17.0578	14.8234	19.0847	17.9784	17.017	17.4492	18.7016	18.5479	17.8089	18.8375	17.0636	17.4824	15.4727	15.6523	15.0296	15.8948	15.2806	16.1353	17.6413	13.6079	14.2029	15.7054	17.1025	16.3679	19.052	16.2096	16.6985	17.4493	16.9357	17.4024	17.2923	17.7211	14.22	17.0764	19.1852	15.9168	16.4692	16.6588	16.2827	16.5685	15.8427
PABPC4L	ENSG00000254535.3	mRNA	12.5817	11.9205	11.4085	13.4213	12.9006	13.5809	12.278	12.4319	12.0952	12.5884	12.2225	12.3056	11.4948	12.3044	12.2757	12.5889	14.895	12.102	11.794	12.9763	12.1143	12.4638	13.617	12.6197	10.5957	11.5248	11.6491	11.181	12.1046	11.8192	12.5314	13.3212	15.507	14.0272	11.9186	11.0828	13.4506	11.7272	14.1433	12.7332	13.9063	12.3627	11.6084	12.4202	11.339	11.993	12.0559
PACS2	ENSG00000179364.12	mRNA	16.6614	17.3027	18.0824	17.0029	17.3214	17.7524	18.1992	16.9075	18.219	18.0128	18.1602	17.3306	17.5656	17.9628	17.8744	17.8858	17.7367	18.389	18.0205	17.4999	16.6632	16.7449	16.1736	18.4436	17.8134	16.6442	17.238	17.6624	16.7061	16.3385	17.7719	16.6203	17.876	17.5754	18.6839	17.2811	17.2184	18.1548	17.605	17.7	17.7258	16.7313	17.4564	17.4101	17.2902	17.6043	17.2285
PAG1	ENSG00000076641.4	mRNA	15.7601	16.5194	16.2124	15.9033	16.2039	15.7366	15.7971	15.5018	15.9026	16.1108	16.4334	17.0966	16.382	16.191	17.0761	16.2419	16.4308	17.0154	15.9453	16.0235	16.1655	16.5523	16.4803	16.3804	16.3295	15.8029	16.0537	16.7071	16.0665	16.107	15.9458	16.4298	15.6381	16.1532	15.86	16.3043	16.2535	16.6075	16.8882	16.6144	16.8191	16.7889	16.2631	16.0343	15.3049	16.3415	15.855
PAGE1	ENSG00000068985.4	mRNA	0	0	0	9.45947	9.42175	11.5213	0	0	0	0	0	0	0	0	0	0	9.20292	0	10.75	0	0	0	9.19169	0	0	0	0	0	0	10.0705	0	0	0	0	10.2901	0	9.18737	0	0	9.47948	0	9.58612	9.18278	0	0	0	0
PAIP2B	ENSG00000124374.8	mRNA	13.5439	13.6429	14.954	13.1492	14.7693	15.3041	16.086	12.3996	14.351	13.8976	16.5371	13.7795	14.4458	13.5008	15.0881	14.487	15.3101	16.2906	17.2036	13.03	15.1677	15.1955	14.4096	17.1477	10.8787	12.5782	13.6182	13.7374	14.8309	13.9387	12.2112	12.3576	15.6603	13.9652	17.3616	14.4501	16.6805	14.5561	14.8688	15.2042	13.9764	15.6648	13.8239	13.3423	13.3369	14.4678	12.6338
PALM	ENSG00000099864.16	mRNA	16.631	19.1182	18.9816	15.1001	17.9246	19.3213	16.9095	15.2861	18.9696	18.2024	19.2288	18.1483	18.2314	17.7087	17.1627	18.121	18.4365	18.8387	19.7488	15.5105	18.7304	18.374	17.2393	19.6287	17.7988	18.4057	18.5077	16.9539	18.2745	17.8292	19.0751	18.2263	17.358	18.4433	19.0179	17.0028	19.392	18.6363	17.8066	18.3176	15.6931	18.4751	19.1844	18.7941	18.6533	19.2185	16.1052
PAPLN	ENSG00000100767.14	mRNA	16.4008	12.9459	14.4244	16.2495	16.145	15.782	16.9517	14.4532	16.661	15.2687	16.6365	15.8468	14.2315	15.1842	17.1352	14.9543	14.282	15.1564	14.3959	16.7043	13.3965	13.3792	17.9903	14.6512	17.2686	13.3329	15.1626	17.2315	15.2236	15.0398	14.338	16.076	16.7943	16.6724	17.6908	15.3748	14.4166	13.7408	14.4182	16.9968	14.9824	14.1804	12.4155	15.4833	14.2438	13.6033	16.1704
PAPPA	ENSG00000182752.9	mRNA	14.6318	10.1398	9.91946	12.6583	12.6024	13.8259	11.8777	14.8596	10.1846	8.24252	10.5988	8.9383	12.8021	9.85628	13.4482	9.81441	11.472	10.6184	9.95132	10.576	11.1652	10.4075	10.1567	9.68638	7.50123	9.01055	11.7133	13.3054	12.578	11.472	9.4482	17.1303	8.42124	10.6245	11.753	11.9335	10.065	11.9664	9.87141	12.2753	9.7739	10.464	9.30923	12.3329	13.3282	11.1289	9.56742
PAPSS2	ENSG00000198682.11	mRNA	17.2464	16.8704	16.794	17.2262	17.6932	16.61	17.0292	18.0144	15.5337	15.5881	16.0101	16.9276	16.7664	16.3003	16.8544	16.9425	15.468	16.8372	16.7072	17.6654	16.6922	16.2865	16.4884	15.7926	16.4774	17.3067	16.128	16.4776	15.2446	15.434	15.6217	17.2043	15.9776	17.0265	16.5503	17.239	15.1666	16.4623	16.2223	17.1424	16.1019	16.2744	15.2203	16.3251	15.7635	16.7215	16.7828
PAQR5	ENSG00000137819.12	mRNA	13.135	10.2825	13.2984	13.3707	13.4318	13.382	14.2233	13.5029	12.6804	12.3255	14.06	11.3333	13.4585	12.5742	14.6488	12.8955	13.7089	13.4217	13.6033	13.2291	11.5959	12.0386	13.2758	13.1157	12.1958	13.5657	13.1667	14.7551	13.1473	13.6373	11.699	13.3701	13.5292	12.4572	13.7491	12.8779	13.0247	11.875	11.2861	12.0327	12.8171	12.3581	11.8369	13.2713	12.952	13.0904	10.9465
PARP10	ENSG00000178685.12	mRNA	17.4194	16.018	17.8506	18.4222	17.9691	17.9449	18.558	16.6497	18.3667	16.5674	17.6204	16.4689	17.607	17.9686	17.4124	18.1176	18.7095	16.1525	15.9672	17.7865	15.891	15.376	17.5537	15.9797	19.917	16.4885	17.2016	17.9427	17.2745	16.085	16.8006	17.3783	17.9616	16.6196	17.6792	17.3387	15.6724	18.5992	17.5762	17.7059	17.8239	17.2693	17.2527	16.3909	17.2085	16.8127	18.182
PARP9	ENSG00000138496.15	mRNA	16.9512	16.8048	18.22	18.642	17.6011	17.8167	18.0314	17.4729	17.2694	16.9599	18.0139	17.0933	17.5994	17.8027	17.6514	17.9417	18.4103	16.8305	16.6142	18.161	16.9244	16.6994	17.7556	15.8509	19.0671	17.7522	18.2497	17.5049	18.401	18.2249	17.44	17.7014	18.109	17.0628	17.0541	18.4424	16.6213	17.5397	16.8983	17.7405	17.4937	17.7881	17.2427	17.0651	17.7008	17.5443	18.7916
PARVB	ENSG00000188677.13	mRNA	17.0684	15.6302	15.2293	16.9645	17.1956	16.6291	16.9273	18.3933	15.5165	15.6486	16.0372	16.5293	16.6205	16.5903	15.8994	16.6034	15.0836	15.7071	16.5502	16.8554	17.3514	15.051	15.0323	15.6631	17.5179	16.6735	16.296	16.917	15.2258	15.765	16.8523	17.0896	14.1992	16.2204	16.1364	16.9085	14.4259	15.9202	14.534	15.8758	15.6067	16.013	16.5134	17.637	15.4829	17.0038	16.5194
PC	ENSG00000173599.12	mRNA	17.2104	17.1429	17.518	15.9364	17.3453	18.0654	17.3112	17.7525	17.2662	16.6234	17.2398	16.7752	16.655	16.7528	16.9608	16.0691	18.0002	17.6542	17.5181	16.8935	17.3693	17.8778	17.3609	18.0583	16.3311	17.316	16.9081	16.5641	16.6191	16.2285	16.5122	17.502	17.2657	16.948	17.8439	16.1755	17.3666	17.6117	18.3145	17.2442	16.9962	18.5018	16.5153	17.0562	17.8366	17.4717	16.2898
PCDH9	ENSG00000184226.13	mRNA	15.3856	13.6783	15.7621	12.6556	16.3653	17.4442	15.9833	15.4356	14.8314	14.8035	16.0223	15.3499	16.245	15.86	16.3768	14.7469	14.5688	14.9966	15.6308	14.8807	14.8903	14.4794	14.6011	15.7208	16.2118	15.671	16.1886	17.3097	15.5083	13.8214	15.1985	14.5227	15.5111	17.8171	17.6949	15.2616	15.5759	15.3393	15.6915	14.5539	15.7311	14.3751	16.0591	15.771	16.4308	16.322	16.4279
PCOLCE	ENSG00000106333.11	mRNA	22.0869	17.9877	17.1027	22.8117	18.8767	18.5041	18.0378	23.0412	18.0959	19.3478	17.0727	17.5793	18.4557	18.0701	17.5845	17.255	18.2967	17.2587	17.1678	20.4847	17.4481	16.6282	15.9069	17.4088	17.2185	17.5173	18.694	17.1957	18.4881	17.164	18.3944	19.3824	18.3215	17.8329	16.3556	17.8188	17.2445	18.8626	17.8448	19.1331	17.6506	17.4052	17.786	19.2447	17.056	16.5214	18.0145
PCSK9	ENSG00000169174.10	mRNA	9.85957	9.52668	8.8155	8.55625	10.1009	11.4237	9.99983	11.0523	8.91716	9.64845	9.04422	9.8901	8.98393	9.07365	7.25177	7.28346	9.75656	9.64795	9.84576	8.50992	9.64563	11.2607	7.87534	11.7493	9.71122	9.86299	9.39207	9.24595	8.0988	9.48812	8.66595	10.7917	10.12	10.7151	9.97031	9.48843	9.2822	8.05847	8.15261	8.8974	8.57726	8.68275	8.27993	8.85157	9.16028	9.53907	9.04753
PCYOX1L	ENSG00000145882.9	mRNA	15.7825	15.7209	16.508	16.1773	16.5504	16.684	16.3923	15.9515	16.4847	15.6948	16.3085	16.0282	16.7203	16.408	16.6732	16.5685	16.9083	16.2694	16.4182	16.4132	16.9833	16.0985	16.6529	16.6544	15.8647	16.6379	16.5582	16.1874	16.1237	15.8593	17.1694	16.332	16.4014	16.7852	15.521	15.8832	16.8482	16.9579	15.3782	16.5924	16.9854	16.5312	16.5948	16.6209	16.4451	16.1829	16.9463
PDCD4	ENSG00000150593.14	mRNA	17.0181	17.4579	17.186	17.9542	17.7501	16.9762	17.4963	16.9179	16.7336	16.6063	17.4821	16.8781	16.8653	16.73	16.9811	17.0523	17.2432	17.8037	17.1868	17.7434	16.9419	18.8393	17.8582	16.6432	17.5621	17.6583	16.5313	17.2999	16.7388	16.6729	16.5438	16.8325	17.025	16.9011	17.6253	17.1441	18.0922	16.9887	16.2039	17.3948	16.5252	17.0492	16.0507	17.1698	16.6716	16.4221	16.9031
PDE1A	ENSG00000115252.17	mRNA	15.2984	14.5306	14.7201	13.8668	13.9323	14.6813	13.5261	13.3028	12.5339	13.3252	14.8061	13.7927	14.4743	13.975	13.5058	13.0284	13.2736	14.6637	17.389	13.9886	14.0459	16.4795	14.4678	15.1931	10.7814	12.8803	13.3948	12.4606	14.9196	13.5885	13.4784	13.958	13.7619	12.8059	14.6621	14.2062	16.0717	12.4463	16.2172	13.6209	12.1043	14.5103	13.5013	15.0375	12.3789	14.1933	12.844
PDE1C	ENSG00000154678.15	mRNA	16.3366	12.0017	14.8915	16.5313	15.2072	14.736	16.0876	14.0442	14.9764	15.8191	14.9384	14.8839	15.9695	14.5836	16.1623	14.4239	13.7919	14.5216	15.5829	14.3283	13.8949	12.9806	15.8147	15.0015	15.3544	13.9954	15.0038	16.8233	13.6492	15.9842	13.3898	15.3306	16.0393	15.563	15.8423	15.5498	14.4019	14.3752	13.3144	15.4444	15.4776	12.4833	15.59	16.0507	13.5682	15.8167	16.4541
PDE3B	ENSG00000152270.7	mRNA	14.3318	14.5335	12.9372	14.5364	14.2959	13.5328	14.4585	12.819	13.1077	13.0287	13.8997	14.4683	13.1802	12.6457	13.9134	13.8096	13.1972	14.3335	14.1297	13.2956	14.1435	13.1508	14.7793	14.6316	12.3838	13.2643	12.6491	13.34	12.8267	12.4707	10.9848	12.3657	14.2308	13.1668	13.1846	13.8184	13.3555	12.7353	13.4226	13.7743	13.1987	13.555	11.5507	11.8332	13.6254	14.0017	12.9066
PDE4A	ENSG00000065989.14	mRNA	16.378	15.8061	14.5979	15.6481	16.9805	16.5921	15.8095	16.0868	16.5642	16.4868	16.8551	15.2354	16.4063	16.172	14.4737	17.2124	15.4531	15.4738	16.6278	16.396	16.6499	14.0368	16.4025	16.6995	17.6041	16.1498	15.6051	17.9547	16.0655	15.3518	15.6705	16.3869	16.7764	16.7214	17.0881	15.362	14.585	15.885	14.7126	16.176	14.6004	15.5715	16.6528	17.1161	15.4375	17.6667	16.2606
PDE4D	ENSG00000113448.15	mRNA	15.7293	13.6419	16.768	15.9375	15.4029	15.3049	14.4684	15.2968	14.2121	14.2711	14.9819	15.6948	14.9397	13.9516	14.5663	14.9435	15.3654	14.81	15.1579	15.755	15.644	16.1953	15.6794	15.7207	14.6956	14.2085	13.4995	15.7655	15.7065	16.8406	13.0088	16.1055	16.435	15.2771	15.7316	14.9935	14.9459	13.8845	13.9947	15.5311	14.3153	14.1625	14.7242	13.7816	14.7382	14.9299	12.4295
PDE4DIP	ENSG00000178104.18	mRNA	17.099	15.4557	17.1238	16.1958	16.9353	16.7369	16.8381	15.8135	15.9471	15.7227	16.6423	16.2583	14.8422	15.2519	17.0931	15.1995	16.9737	16.8344	16.3353	15.4248	16.0315	18.5	17.3957	16.898	17.4859	17.2313	16.8257	15.9611	16.6903	16.8615	16.2521	16.3803	17.0536	17.3163	17.8194	16.4311	18.2176	16.6397	17.3586	17.0396	15.1438	17.0491	15.1214	16.9885	17.6236	17.2947	16.4863
PDE7B	ENSG00000171408.12	mRNA	15.8982	14.7104	15.6695	14.2277	14.6124	15.4265	15.0149	14.6035	16.0596	15.6627	16.1812	16.1938	15.0536	15.8672	16.2687	17.363	14.8016	15.7086	15.4237	15.645	15.4688	15.7287	15.2979	15.0286	13.5274	13.8967	14.0049	16.2735	15.5454	14.6367	14.5103	13.8575	15.6239	15.6251	16.1591	15.3208	14.1066	14.6884	14.4569	15.6811	16.0482	14.7681	15.5763	15.968	14.5981	16.7664	14.7436
PDE8B	ENSG00000113231.12	mRNA	15.0097	15.9827	15.0582	16.4295	16.3437	16.2133	17.8782	16.9838	17.2017	16.1244	16.167	17.5936	17.0767	16.8817	17.6025	16.6333	16.2868	17.379	16.6387	16.8235	15.5511	17.0898	18.9814	17.5968	15.6648	16.4892	15.7577	16.7732	15.7175	16.3626	15.7923	15.3963	16.7531	16.5279	17.3486	16.2571	16.3123	16.4369	17.4192	17.9037	16.9809	16.9615	16.2544	16.3453	16.5519	17.1564	16.1542
PDGFRB	ENSG00000113721.12	mRNA	18.8491	18.6533	18.2804	19.3588	18.0756	18.2769	18.3987	20.0732	18.0467	18.4021	18.0605	18.5479	18.8461	19.0904	18.7344	18.6736	17.9368	18.9473	17.7137	18.8599	17.3522	17.8661	17.3938	18.1603	18.0007	17.8102	17.3437	18.339	16.306	16.8487	18.1558	18.6275	17.8783	19.2623	18.08	17.207	16.5058	18.9141	17.9997	18.986	18.4837	17.7519	17.9573	19.1934	16.8345	19.0184	18.4152
PDK4	ENSG00000004799.7	mRNA	17.4588	19.519	17.3604	17.3564	18.3012	17.4842	18.1592	16.3983	14.5907	16.118	17.8655	16.7169	14.775	15.1343	17.3643	15.3659	16.0905	17.2997	18.1474	18.6956	15.1535	17.0026	19.0037	18.2893	15.898	16.997	16.6712	15.7096	15.9135	14.9771	14.0697	16.7575	16.7703	17.1946	18.2429	16.3165	17.4259	17.2424	16.0867	18.787	14.3287	16.662	12.9395	15.3394	16.6833	15.043	16.0266
PDLIM1	ENSG00000107438.7	mRNA	20.205	18.124	19.5945	18.0525	18.759	17.9343	17.7424	18.9478	18.6162	18.6721	17.5155	18.9211	18.6471	18.1855	17.9911	17.2607	17.8899	17.5738	18.1262	18.1663	20.4054	16.6176	14.5876	17.2482	16.5117	16.8942	18.2491	17.767	17.427	19.6164	18.9478	19.9501	17.3291	17.9122	17.8862	19.2859	18.071	17.6174	18.206	18.2038	17.9938	18.657	17.8842	19.5798	17.381	19.3753	17.7401
PDPR	ENSG00000090857.12	mRNA	16.5131	16.7042	16.1151	17.6822	16.5923	16.2105	17.0794	16.8108	16.9278	16.8452	16.7083	17.2761	17.283	16.2286	17.8062	17.9561	16.0707	17.4292	15.2734	16.1281	16.5146	17.7337	15.158	16.759	17.1835	15.5828	16.2443	16.9942	15.979	15.0231	17.0412	16.2524	17.2326	17.2707	17.6487	16.8643	17.0204	17.375	16.5579	17.1568	17.9341	17.2952	16.8249	16.7467	16.6871	16.8723	16.303
PELI1	ENSG00000197329.10	mRNA	17.7715	18.8572	18.2356	17.6124	18.4183	17.4193	18.0476	17.6083	16.6587	17.3894	17.6143	18.1918	17.4803	17.1643	17.8238	17.5077	17.7592	18.3398	17.8282	18.2547	18.2166	18.1657	17.993	18.5761	17.2546	17.4399	17.8181	17.1881	17.6498	18.2127	17.0586	17.6469	17.3491	17.7569	17.492	17.6452	18.2545	16.9999	18.568	17.7951	17.0452	17.9548	17.6805	17.3531	17.2199	17.189	17.2505
PELI2	ENSG00000139946.8	mRNA	16.089	16.335	15.2677	15.49	15.6806	15.5394	15.9142	14.4548	15.2328	15.4135	16.6225	16.0043	15.3706	14.077	15.7695	15.8306	16.2331	16.779	14.8233	15.1806	14.5954	15.3573	15.095	15.2932	16.0504	14.236	15.407	14.8262	15.3333	15.4228	15.6437	14.7886	16.7432	16.151	16.3787	15.0754	14.7758	16.1356	15.8798	16.6212	15.4844	15.5694	15.3719	14.8329	15.9043	15.6462	15.2808
PER1	ENSG00000179094.12	mRNA	19.2514	17.6995	19.7703	16.9762	18.5023	18.5413	18.7163	17.4094	17.9495	16.5063	18.8549	19.0324	17.5455	17.3773	18.535	17.5572	17.3341	18.1384	17.856	19.1354	17.1581	18.7054	18.7607	18.7976	19.5093	19.1802	18.3322	18.3018	17.605	16.7145	19.4104	18.7259	18.855	19.7642	19.4024	17.9816	20.7694	19.5445	17.1693	18.808	18.7109	18.709	16.0636	18.9445	18.7966	18.8769	19.1961
PERP	ENSG00000112378.11	mRNA	17.4004	14.1478	14.5388	13.8972	16.7117	15.8313	14.5094	15.3332	14.9524	15.3699	16.9962	15.1658	16.7752	13.8309	14.5973	13.4784	13.1258	13.9109	15.2885	15.4009	15.508	13.7976	12.6292	14.5932	12.1983	14.5457	14.9674	17.1692	16.8365	17.2345	14.2788	19.0515	14.3534	15.2084	15.6218	16.8289	13.6452	14.4452	13.2044	15.7363	14.2264	14.8314	13.9746	17.0841	14.677	14.8163	13.8946
PFKFB2	ENSG00000123836.13	mRNA	15.0382	15.2812	16.3069	16.2035	17.962	16.6483	15.9841	15.2628	17.5258	16.0642	18.0918	16.5519	15.6912	15.4858	15.6773	15.8516	16.3853	15.605	16.6034	15.5638	16.5979	17.1265	15.8459	16.5778	15.3101	15.5558	15.0163	15.888	16.3818	16.5304	16.0016	15.7361	17.2872	16.1468	16.8138	15.5057	17.2055	16.3511	17.139	17.3554	16.5696	18.1045	14.9966	15.8701	16.6965	16.2658	14.5912
PFKFB3	ENSG00000170525.17	mRNA	20.0228	19.2805	19.4019	19.0976	19.7996	20.067	19.7379	19.4214	19.6108	19.3168	20.0951	19.8954	19.8594	18.9224	19.6102	18.7728	20.2735	19.9686	18.8204	20.3855	19.0569	18.9836	19.5742	19.3431	18.4054	18.5761	19.4949	20.9023	18.7749	19.3391	18.8822	19.6185	18.3767	20.5073	19.4121	19.3754	19.0606	19.489	20.1433	19.7914	19.6731	19.5493	18.7311	18.791	19.6458	19.6883	18.6653
PGAP2	ENSG00000148985.18	mRNA	16.8	16.0722	17.4739	17.324	17.1579	17.5213	17.0775	17.2086	18.4596	18.3752	16.8917	17.0371	17.2138	17.5667	17.2145	17.3318	17.9428	16.2533	17.0684	17.2267	16.9996	16.5986	17.9563	17.3283	17.5473	17.7452	17.0332	16.6703	17.4742	17.158	18.3344	17.341	17.1174	17.1603	17.1631	17.264	16.9916	17.7018	16.3045	16.92	18.4367	17.525	17.356	17.22	17.0816	16.876	17.214
PGBD3	ENSG00000243251.5	mRNA	9.44621	8.52979	0	9.7252	10.2718	9.78855	7.71694	0	7.76995	0	7.63488	8.74111	0	7.66423	7.42179	0	7.47468	10.818	8.43449	8.68056	0	9.62565	9.043	9.16759	8.3002	0	0	8.09801	9.26696	0	7.83979	0	9.07009	0	8.55883	7.4956	8.45508	0	8.73703	9.33074	9.16212	0	8.4505	0	7.75059	7.54603	7.63818
PGBD5	ENSG00000177614.8	mRNA	15.2836	16.4336	15.9604	16.1348	15.7113	16.5179	15.8526	15.5867	15.3398	14.6729	15.374	15.7296	16.4681	14.2677	15.1302	13.7688	15.9854	15.4972	16.9418	15.8654	15.7586	13.6028	16.4042	17.1043	15.941	14.4238	15.0668	15.6455	13.9843	15.307	15.2137	17.1784	16.1173	15.8213	15.7678	15.1493	15.7182	14.4865	13.1995	15.523	14.986	16.1243	15.6429	14.0689	15.7683	15.8968	14.4388
PGM2L1	ENSG00000165434.7	mRNA	18.1179	17.2051	14.831	16.4224	17.1176	17.1044	16.9785	17.2263	16.6972	16.1677	17.0224	17.9849	18.0412	16.8012	16.8129	16.2139	16.5406	16.5467	17.519	18.3558	18.0167	16.1441	16.9672	16.21	14.8587	15.1001	16.5838	18.2806	17.0258	16.9481	15.8947	18.7577	15.7195	15.9609	16.9105	18.7324	16.3587	17.2979	18.6534	17.7607	16.5533	17.7478	17.1029	16.9412	17.124	17.7958	16.0805
PHEX	ENSG00000102174.8	mRNA	14.2128	13.7383	14.1713	13.5695	14.5955	13.3872	15.0514	15.1961	15.0091	13.6016	14.8962	15.7747	14.9054	14.0168	14.9902	14.5272	14.3212	14.594	14.377	14.1924	15.5338	14.0017	15.3629	13.7341	13.8959	15.8254	14.9508	14.0475	15.5966	16.0422	13.6532	14.254	16.1183	13.8453	14.7194	16.1019	15.1167	14.8683	16.0687	14.9559	14.1063	16.1026	14.3971	14.6684	16.0493	14.3085	14.4057
PHYHIP	ENSG00000168490.12	mRNA	17.2998	15.6446	16.6849	14.4162	16.7077	19.0571	15.2992	15.1325	16.2559	16.5251	18.2118	16.6272	17.4015	17.359	15.9845	13.6287	16.0695	16.3891	20.0418	16.2136	14.9735	15.9759	16.5616	17.7149	12.4256	14.6681	16.9592	16.0546	17.2821	16.0279	16.4006	15.9349	15.4866	15.6276	17.0369	15.6008	17.9059	14.7634	17.0001	16.6977	13.2674	18.2314	15.5761	15.5445	15.5262	18.3747	15.1509
PI15	ENSG00000137558.6	mRNA	16.6919	11.9822	12.5678	15.6072	15.0171	13.1807	13.125	15.3277	14.0238	12.314	11.9115	13.4787	13.2486	10.5492	12.4477	13.1353	11.8175	11.6264	12.1963	11.5984	12.5808	12.8371	11.2539	11.3298	9.41129	12.9066	13.9706	15.497	13.2292	13.1011	12.5322	10.8215	12.2484	11.5906	11.8616	12.394	11.3724	12.9228	12.625	14.3581	11.0514	13.2756	10.9232	11.3619	13.3721	12.2877	10.8921
PI3	ENSG00000124102.4	mRNA	20.3195	15.4646	12.6004	15.4951	21.8213	19.8289	14.7781	15.7663	17.8968	13.5639	19.3295	13.764	19.6531	15.3772	13.5221	16.4501	17.8931	15.3409	17.7953	23.1382	14.6923	15.3699	14.8535	13.5633	13.5564	13.8644	18.3793	23.9501	17.8472	23.1413	18.2357	20.2441	14.1761	17.9421	18.3329	17.5912	15.3439	15.2503	12.9945	19.3098	14.4203	20.1143	13.7071	13.8063	16.9864	13.1776	14.699
PIGZ	ENSG00000119227.6	mRNA	15.4508	15.1781	14.6316	15.6494	16.3769	16.2035	15.8867	12.6239	17.2044	17.1082	16.4693	14.8583	16.256	14.8406	15.5552	16.1861	15.5942	15.5191	16.3582	15.0583	14.8009	15.0862	14.7506	16.024	14.9478	16.7697	14.8243	15.4438	16.2622	15.668	16.8233	15.9769	12.3713	16.2348	16.8597	16.5083	14.5787	16.0144	14.9642	15.0639	16.9684	15.9457	15.1567	15.2685	16.3355	16.4415	16.243
PIK3AP1	ENSG00000155629.13	mRNA	16.6595	16.8725	15.6926	18.2663	17.0254	17.0086	17.3467	17.2765	15.5824	15.4057	17.6811	15.8921	16.6907	16.0653	16.7304	15.733	17.2549	17.3951	16.5698	17.6691	14.7796	15.3373	16.1513	15.6378	17.0499	16.0014	16.7957	18.3683	16.7358	17.9549	14.436	17.5821	17.2815	14.3388	15.2416	17.5883	15.2725	15.4632	15.3647	16.383	13.7851	17.6725	15.8212	14.4688	16.1911	15.5886	16.3052
PIK3C2B	ENSG00000133056.12	mRNA	13.3919	15.6927	15.9643	14.7242	15.5092	15.2289	15.1205	13.945	15.1718	16.5659	15.8408	16.1981	15.4493	16.4798	16.0321	15.7341	14.9182	16.6159	18.4743	14.7995	15.3004	15.8608	14.8816	20.6721	16.2547	14.2599	15.3373	14.7649	14.8191	13.9041	16.8341	13.6024	14.9008	16.458	16.0821	14.4453	16.9285	14.504	15.3755	15.7975	15.8919	14.7439	16.4907	15.5711	13.9628	15.5109	15.9078
PIK3CG	ENSG00000105851.9	mRNA	14.8586	13.3322	12.6819	15.7017	14.5895	14.1192	15.0323	14.785	12.9555	12.3261	14.9397	14.0965	14.9901	14.7658	15.5221	14.1926	14.9538	14.9762	14.4213	14.9823	11.8951	13.4107	14.7016	13.5369	14.248	14.2538	13.6698	15.4082	14.1088	14.7892	12.055	14.6769	14.0542	12.5113	13.1325	15.1418	12.2954	12.7559	12.7706	13.8755	11.5954	13.6176	13.2527	12.8297	14.4659	13.5995	13.5834
PINK1	ENSG00000158828.5	mRNA	17.5332	17.4288	17.6441	16.5723	17.7969	18.3537	18.2571	17.4109	17.5876	17.7827	18.3097	16.869	18.1178	17.6656	17.6136	17.6189	18.2081	18.1085	18.8217	18.3151	17.2999	18.0934	18.5807	18.0987	18.0883	19.4033	18.2343	18.1816	17.5624	17.827	17.8011	16.9573	18.2339	18.0515	18.8926	17.3953	18.1084	18.4247	17.6537	18.2127	17.4824	18.046	17.8444	18.1232	18.1815	18.6675	18.1323
PITPNM2	ENSG00000090975.11	mRNA	14.7487	15.2489	15.4474	14.9355	16.336	16.2406	15.2393	15.3641	16.2524	16.5082	16.2004	16.1774	16.6405	15.567	16.0488	16.0163	14.94	15.9258	16.1648	15.4423	15.9026	14.6505	15.3492	15.5496	15.9597	14.4558	15.6298	15.5444	15.0154	15.8378	16.2951	15.8552	16.1729	17.1045	16.1791	16.3345	15.2416	14.886	16.3551	16.7541	15.5231	15.3889	15.6118	16.11	16.5003	16.2472	15.8948
PKD1L1	ENSG00000158683.6	mRNA	10.3369	10.463	11.0457	10.0089	11.7872	11.8489	10.3033	10.4373	12.2099	11.3824	12.4503	9.53823	11.3421	11.7971	11.393	11.1189	11.6255	10.398	10.7152	11.7391	12.4617	9.10308	8.80962	9.05945	11.969	10.0251	10.977	10.0732	10.4792	10.7513	10.726	10.755	12.9592	12.8335	9.25638	11.789	10.9872	12.5534	11.8352	11.7017	11.9343	10.7428	10.3835	11.3712	11.7445	10.3852	12.0148
PKDCC	ENSG00000162878.11	mRNA	15.5116	15.9394	14.8285	15.5182	15.6593	14.5446	15.5048	15.0866	16.1672	16.0726	15.3041	15.5361	15.7706	15.5475	14.9827	15.6759	14.9154	16.6402	15.9136	14.8666	16.0247	13.9259	14.4984	15.202	14.4907	13.1259	14.1346	15.1663	15.2055	14.883	15.3637	14.0092	14.2174	15.0457	15.3424	15.7998	14.7986	15.1912	15.6612	15.5456	15.2981	14.1105	15.2448	15.9996	13.5749	15.2617	14.7165
PKIA	ENSG00000171033.11	mRNA	17.6583	19.6061	19.2067	16.8711	18.2793	18.0036	17.2069	17.879	17.9123	18.0546	18.0201	19.5955	17.6039	17.5499	18.1226	17.4624	18.556	18.7866	20.2281	18.2963	18.3349	18.0242	18.998	20.63	15.0998	17.7663	17.741	17.5087	18.9775	17.6645	17.7014	17.5329	16.6004	17.3196	16.704	18.9553	18.1296	17.9114	18.7932	18.3729	17.5052	18.9429	18.7323	16.8559	17.87	18.6214	16.462
[truncated: 526 more rows]
[truncated: 20 more columns]
