# Supplementary material for: Analysis and Construction of ceRNA Networks Reveal 4 mRNAs as Potential Biomarkers of Temozolomide-resistant Glioblastomas
Source: Research Square preprint supplement (doi:10.21203/rs.3.rs-515099/v1), 2021-05-21
Supplement: Supplementary file 2 [file c9a15dfc935d927baac2e503.xlsx]

## Sheet: Sheet1
clinical data of selected samples
ID	patient.bcr_patient_barcode	patient.days_to_death	patient.days_to_last_followup	patient.follow_ups.follow_up.days_to_death	patient.follow_ups.follow_up.days_to_last_followup	patient.drugs.drug.drug_name	patient.drugs.drug.therapy_types.therapy_type	patient.drugs.drug-2.therapy_types.therapy_type
TCGA-06-5417	tcga-06-5417	NA	155	NA	155	temodar	chemotherapy	NA
TCGA-12-3653	tcga-12-3653	442	357	442	357	temodar	chemotherapy	chemotherapy
TCGA-14-1402	tcga-14-1402	975	975	975	975	temodar	chemotherapy	hormone therapy
TCGA-14-1823	tcga-14-1823	543	543	543	543	temodar	chemotherapy	targeted molecular therapy
TCGA-19-1787	tcga-19-1787	385	385	385	385	temodar	chemotherapy	chemotherapy
TCGA-19-5960	tcga-19-5960	NA	165	NA	165	temodar	chemotherapy	chemotherapy
TCGA-28-2509	tcga-28-2509	NA	145	NA	145	temodar	chemotherapy	targeted molecular therapy
TCGA-32-1970	tcga-32-1970	468	468	468	468	temodar	chemotherapy	chemotherapy
TCGA-32-2615	tcga-32-2615	485	485	485	485	temodar	chemotherapy	chemotherapy
TCGA-32-4213	tcga-32-4213	NA	357	NA	357	temodar	chemotherapy	chemotherapy
TCGA-32-5222	tcga-32-5222	NA	165	NA	165	temodar	chemotherapy	NA
TCGA-41-2571	tcga-41-2571	26	26	26	26	temodar	chemotherapy	NA
TCGA-41-3915	tcga-41-3915	NA	184	360	360	temodar	chemotherapy	chemotherapy
TCGA-76-4925	tcga-76-4925	146	146	146	146	temodar	chemotherapy	NA
TCGA-76-4926	tcga-76-4926	138	138	138	138	temodar	chemotherapy	NA
TCGA-76-4928	tcga-76-4928	94	94	94	94	temodar	chemotherapy	NA
TCGA-76-4931	tcga-76-4931	279	279	279	279	temodar	chemotherapy	NA
TCGA-02-2483	tcga-02-2483	NA	466	NA	466	temodar	chemotherapy	chemotherapy
TCGA-02-2485	tcga-02-2485	NA	470	NA	470	temodar	chemotherapy	chemotherapy
TCGA-06-2559	tcga-06-2559	150	150	150	150	temodar	chemotherapy	NA
TCGA-06-2562	tcga-06-2562	NA	86	NA	86	temodar	chemotherapy	NA
TCGA-06-2563	tcga-06-2563	NA	259	NA	259	temodar	chemotherapy	targeted molecular therapy
TCGA-06-2564	tcga-06-2564	NA	181	NA	181	temodar	chemotherapy	NA
TCGA-06-2565	tcga-06-2565	NA	207	NA	207	temodar	chemotherapy	chemotherapy
TCGA-06-2567	tcga-06-2567	133	133	133	133	temodar	chemotherapy	NA
TCGA-06-2570	tcga-06-2570	NA	285	NA	285	temodar	chemotherapy	chemotherapy
TCGA-14-0789	tcga-14-0789	342	342	342	342	temodar	chemotherapy	chemotherapy
TCGA-28-5204	tcga-28-5204	454	NA	454	NA	temodar	chemotherapy	chemotherapy
TCGA-28-5207	tcga-28-5207	343	275	343	275	temodar	chemotherapy	chemotherapy
TCGA-28-5208	tcga-28-5208	NA	474	NA	474	temodar	chemotherapy	chemotherapy
TCGA-28-5209	tcga-28-5209	NA	77	NA	442	temodar	chemotherapy	chemotherapy
TCGA-28-5213	tcga-28-5213	NA	298	NA	298	temodar	chemotherapy	chemotherapy
TCGA-28-5215	tcga-28-5215	335	237	335	NA	temodar	chemotherapy	chemotherapy
TCGA-28-5216	tcga-28-5216	NA	415	NA	415	temodar	chemotherapy	chemotherapy
TCGA-28-5218	tcga-28-5218	157	128	157	NA	temodar	chemotherapy	chemotherapy
TCGA-28-5220	tcga-28-5220	NA	319	NA	319	temodar	chemotherapy	chemotherapy
TCGA-76-4932	tcga-76-4932	1458	1458	1458	1458	temodar (escalation)	chemotherapy	NA
TCGA-26-5133	tcga-26-5133	NA	452	NA	452	temozolamide	chemotherapy	chemotherapy
TCGA-06-5411	tcga-06-5411	254	254	254	254	temozolomide	chemotherapy	targeted molecular therapy
TCGA-06-5412	tcga-06-5412	138	138	138	138	temozolomide	chemotherapy	chemotherapy
TCGA-06-5416	tcga-06-5416	NA	204	NA	204	temozolomide	chemotherapy	NA
TCGA-06-5859	tcga-06-5859	NA	139	NA	139	temozolomide	chemotherapy	chemotherapy
TCGA-12-1597	tcga-12-1597	675	427	675	427	temozolomide	chemotherapy	chemotherapy
TCGA-12-5295	tcga-12-5295	454	399	454	399	temozolomide	chemotherapy	chemotherapy
TCGA-12-5299	tcga-12-5299	98	98	98	98	temozolomide	chemotherapy	targeted molecular therapy
TCGA-19-2619	tcga-19-2619	NA	294	NA	294	temozolomide	chemotherapy	chemotherapy
TCGA-19-2620	tcga-19-2620	148	148	148	148	temozolomide	chemotherapy	NA
TCGA-19-4065	tcga-19-4065	NA	214	NA	214	temozolomide	chemotherapy	chemotherapy
TCGA-26-5132	tcga-26-5132	NA	286	NA	286	temozolomide	chemotherapy	chemotherapy
TCGA-27-1830	tcga-27-1830	154	146	154	146	temozolomide	chemotherapy	hormone therapy
TCGA-27-1835	tcga-27-1835	648	648	648	648	temozolomide	chemotherapy	chemotherapy
TCGA-27-2519	tcga-27-2519	NA	316	NA	316	temozolomide	chemotherapy	hormone therapy
TCGA-27-2523	tcga-27-2523	489	489	489	489	temozolomide	chemotherapy	hormone therapy
TCGA-27-2528	tcga-27-2528	480	480	480	480	temozolomide	chemotherapy	hormone therapy
TCGA-32-2638	tcga-32-2638	NA	224	NA	224	temozolomide	chemotherapy	targeted molecular therapy
TCGA-02-0055	tcga-02-0055	76	76	76	76	temozolomide	chemotherapy	chemotherapy
TCGA-06-0130	tcga-06-0130	394	320	394	320	temozolomide	chemotherapy	NA
TCGA-06-0141	tcga-06-0141	313	280	313	280	temozolomide	chemotherapy	chemotherapy
TCGA-06-0168	tcga-06-0168	598	579	598	579	temozolomide	chemotherapy	chemotherapy
TCGA-06-0184	tcga-06-0184	NA	1228	NA	1228	temozolomide	chemotherapy	chemotherapy
TCGA-06-0644	tcga-06-0644	NA	375	NA	375	temozolomide	chemotherapy	chemotherapy
TCGA-06-0744	tcga-06-0744	NA	595	NA	595	temozolomide	chemotherapy	chemotherapy
TCGA-06-0882	tcga-06-0882	NA	165	NA	165	temozolomide	chemotherapy	chemotherapy
TCGA-15-0742	tcga-15-0742	419	NA	419	NA	temozolomide	chemotherapy	targeted molecular therapy
TCGA-19-1389	tcga-19-1389	141	141	141	141	temozolomide	chemotherapy	chemotherapy
TCGA-28-2514	tcga-28-2514	NA	160	NA	160	temozolomide	chemotherapy	NA
TCGA-06-0743	tcga-06-0743	NA	679	NA	679	temozolomode	chemotherapy	chemotherapy
